# Supplementary material for: Expanding the “minimalist” small molecule tagging approach to different bioactive compounds
Source: Royal Society of Chemistry journal article supplement (doi:10.1039/c8ob03175d), 2019-01-01
Supplement: c8ob03175d2.xlsx [file c8ob03175d2.xlsx]

## Sheet: HepG2_Protein
Accession	Description	Sum(Coverage)	Sum(# Proteins)	Sum(# Unique Peptides)	Sum(# Peptides)	Sum(# PSMs)	A4: Area	A4: Heavy/Light	A4: Heavy/Light Count	A4: Heavy/Light Variability [%]	B4: Area	B4: Heavy/Light	B4: Heavy/Light Count	B4: Heavy/Light Variability [%]	C4: Area	C4: Heavy/Light	C4: Heavy/Light Count	C4: Heavy/Light Variability [%]	# Peptides A8	# Peptides B8	# Peptides C8	# PSM A8	# PSM B8	# PSM C8	Coverage A8	Coverage B8	Coverage C8	Score A8	Score B8	Score C8	Score Sum	# AAs	MW [kDa]	calc. pI	SILAC positive
IPI00465222.2	chromodomain-helicase-DNA-binding protein 3 isoform 3	0.1578	11	2	26	41	373600000	3.29	1		205000000	2.201	1		118500000	2.343	1		10	11	12	12	15	14	0.069	0.069	0.0869	6.95	5.96	6.72	19.63	2059	232.9	6.23	3
IPI00413451.3	Serpin B6	0.11	1	2	3	9	44140000	2.458	1		56330000	1.308	1		35040000	1.338	1		1	2	3	2	3	4	0.044	0.0807	0.11	5.59	4.97	8.15	18.71	409	46.3	5.76	3
IPI00009368.4	Sideroflexin-1	0.1863	4	3	5	7	33160000	2.192	2	108.8	31370000	1.992	2	80	27090000	1.133	1		3	2	2	3	2	2	0.1242	0.087	0.1087	1.62	4.94	0	6.56	322	35.6	9.07	3
IPI00300074.4	Phenylalanyl-tRNA synthetase beta chain	0.1494	2	3	9	10	394300000	2.093	1		19710000	1.071	1		54150000				5	2	3	5	2	3	0.1053	0.0357	0.0492	0	0	0	0	589	66.1	6.84	2
IPI00179057.6	Isoform 2 of Cullin-4B	0.2458	7	2	21	31	116300000	1.973	2	143.4	57010000	1.253	1		136700000	1.06	1		10	4	11	13	5	13	0.1385	0.0492	0.1341	2.41	1.7	0	4.11	895	102.2	7.94	3
IPI01009629.1	cDNA FLJ51373, highly similar to 26S proteasome non-ATPase regulatory subunit 7	0.251	2	2	5	6	20990000	1.967	1		34440000	1.134	2	17.2	63180000				1	3	2	1	3	2	0.0607	0.1377	0.1336	2.32	3.33	0	5.65	247	28.3	7.62	2
IPI00641992.5	Uncharacterized protein	0.1977	2	4	8	16	103100000	1.885	2	106.4	72370000	1.152	4	19.8	55260000	1.206	2	6.3	4	6	3	6	7	3	0.1126	0.1678	0.092	2.6	6.5	2.69	11.79	435	47.9	5.91	3
IPI00976200.1	adenosine kinase isoform c	0.159	4	2	3	7	14130000	1.822	2	89	25560000	1.342	2	41.5	7138000	2.979	1		2	3	1	2	4	1	0.1254	0.159	0.0489	7.93	9.35	3.51	20.79	327	36.6	6.79	3
IPI00972999.1	Histone deacetylase	0.214	16	3	8	14	133000000	1.779	2	48.2	61580000	0.912	2	28.7	73510000	0.868	2	7	5	3	4	6	4	4	0.1681	0.0699	0.083	1.98	0	2.94	4.92	458	52	5.74	3
IPI00106668.5	perilipin-3 isoform 3	0.1256	3	2	5	9	119400000	1.713	2	48.1	100200000	1.167	1		69080000	1.028	1		2	1	4	2	2	5	0.0664	0.0379	0.0972	1.84	0	0	1.84	422	45.8	5.43	3
IPI01014238.1	cDNA FLJ53963, highly similar to Leukocyte elastase inhibitor	0.2229	3	2	7	8	597500000	1.677	2	50.8	293000000				36730000	1.92	1		5	2	1	5	2	1	0.1554	0.0938	0.0411	1.93	1.93	2.81	6.67	341	38.7	6.67	2
IPI00852917.1	Uncharacterized protein	0.0873	4	1	3	5	10360000	1.635	1		0				98550000	1.314	1		1		3	1		4	0.0416		0.0873	3.12		3.3	6.42	481	53	5.82	2
IPI00940257.2	cDNA FLJ52362, highly similar to T-complex protein 1 subunit epsilon	0.2254	7	3	10	17	206600000	1.613	1		143900000	1.238	2	45.6	211600000	1.861	1		6	4	4	7	5	5	0.1451	0.1228	0.1228	2.73	11.44	0	14.17	448	49.5	6.19	3
IPI00003923.1	Isoform 1 of Uridine 5'-monophosphate synthase	0.1667	10	2	6	11	130200000	1.612	1		54780000	2.037	1		57630000	1.632	1		4	3	3	4	4	3	0.1042	0.1021	0.0854	3.41	6.12	3.84	13.37	480	52.2	7.24	3
IPI00234252.3	SWI/SNF complex subunit SMARCC1	0.1213	2	1	12	25	222900000	1.599	1		138200000	0.988	1		46030000	1.305	1		6	6	4	8	11	6	0.0787	0.0615	0.0407	2.5	1.69	0	4.19	1105	122.8	5.76	3
IPI00012837.1	Kinesin-1 heavy chain	0.1745	7	2	13	20	1224000000	1.553	1		213000000	1.005	1		58670000	1.569	1		6	5	5	7	6	7	0.082	0.0613	0.0758	1.64	3.51	1.7	6.85	963	109.6	6.51	3
IPI00306290.5	Exportin-T	0.0728	1	2	8	12	48940000	1.551	1		265600000	0.967	1		94780000	1.388	1		2	6	2	2	7	3	0.0301	0.0541	0.0229	2.2	2.19	4.76	9.15	962	109.9	5.39	3
IPI00893361.1	Protein	0.3725	12	1	8	13	659300000	1.544	1		156900000	1.075	1		361100000	1.026	1		2	3	5	3	4	6	0.1336	0.1457	0.2429	5.42	6.27	5.86	17.55	247	27.9	9.77	3
IPI00027705.2	Isoform 1 of DNA primase large subunit	0.1945	1	2	10	23	379200000	1.511	2	21	166300000	1.9	2	41.4	191700000	1.809	2	22.9	4	6	8	6	7	10	0.0786	0.1002	0.1768	6.24	2.47	1.92	10.63	509	58.8	7.91	3
IPI00915356.1	Isoform 3 of Cleavage and polyadenylation specificity factor subunit 7	0.2588	17	2	11	23	16070000	1.51	1		287100000	1.138	1		203700000	1.106	1		3	5	7	5	9	9	0.1012	0.1323	0.1595	0	0	4.76	4.76	514	56.3	8.87	3
IPI00742682.2	Nucleoprotein TPR	0.1684	1	3	36	56	387000000	1.507	2	31.5	1222000000	0.019	1		158100000	1.331	1		22	14	12	24	15	17	0.0978	0.0669	0.0609	3.21	0	2.85	6.06	2363	267.1	5.02	3
IPI00030009.4	Isoform A of Bifunctional 3'-phosphoadenosine 5'-phosphosulfate synthase 2	0.184	4	3	10	17	88940000	1.498	3	6.7	19780000	1.136	1		35740000				9	1	4	10	1	6	0.1629	0.0277	0.0798	5.49	0	2.45	7.94	614	69.5	8.03	2
IPI01015355.1	Uncharacterized protein	0.0736	6	2	6	8	66320000	1.484	1		83760000				49560000	1.258	1		2	3	2	2	4	2	0.0276	0.0434	0.0381	0	4.83	2.49	7.32	761	83.4	7.61	2
IPI00011126.6	26S protease regulatory subunit 4	0.1977	2	2	8	21	1358000000	1.477	1		1245000000	1.309	1		542000000				5	7	4	9	8	4	0.1364	0.1909	0.1091	0	1.98	1.76	3.74	440	49.2	6.21	2
IPI00291783.4	Gem-associated protein 5	0.0842	1	1	11	27	80160000	1.476	1		36390000	1.141	1		87690000	1.492	1		8	3	5	11	6	10	0.063	0.0259	0.0411	0	0	1.84	1.84	1508	168.5	6.62	3
IPI00013894.1	Stress-induced-phosphoprotein 1	0.2965	5	4	18	30	513600000	1.47	2	139.5	166800000	1.189	3	23.5	313800000				10	9	6	13	10	7	0.186	0.1878	0.1197	3.59	3.79	4.5	11.88	543	62.6	6.8	2
IPI00978005.1	cDNA FLJ51754, highly similar to Apoptosis inhibitor 5	0.1657	6	1	6	10	243000000	1.469	1		85470000	1.578	1		516400000	1.418	1		3	3	3	3	3	4	0.0858	0.0975	0.0897	3.38	3.19	2.96	9.53	513	57.9	8.57	3
IPI00470498.1	Isoform 3 of Plasminogen activator inhibitor 1 RNA-binding protein	0.2875	4	3	10	18	1267000000	1.442	2	23.1	82090000	1.286	2	3.5	1117000000	1.292	2	0.5	7	4	6	8	4	6	0.2137	0.1425	0.2112	2.67	5.55	5.42	13.64	393	43.1	8.44	3
IPI01014863.1	Acetyl-CoA acetyltransferase, cytosolic	0.1562	2	1	4	7	61700000	1.442	1		0				21360000	1.776	1		3		3	4		3	0.1259		0.1385	4.79		4.64	9.43	397	41.3	6.92	2
IPI00306017.3	cDNA FLJ55475	0.0794	5	1	4	5	12810000	1.431	1		25300000	1.354	1		8976000				1	3	1	1	3	1	0.0217	0.0614	0.0181	0	0	0	0	554	61.3	5.15	2
IPI00292387.6	Isoform Alpha of Nucleolar and coiled-body phosphoprotein 1	0.2089	3	2	11	30	410900000	1.417	2	12.9	364300000	1.287	2	13.5	295600000	1.42	2	4.6	8	6	6	12	9	9	0.1574	0.1302	0.133	4.42	5.69	5.06	15.17	699	73.6	9.47	3
IPI00478232.3	DNA topoisomerase 2	0.183	5	3	26	62	140300000	1.41	3	16.9	3767000000	1.389	2	17.5	10930000000	1.328	1		15	13	12	20	21	21	0.1231	0.0995	0.0804	12.58	10.57	6.89	30.04	1568	178.8	8.69	3
IPI01013296.1	Uncharacterized protein	0.116	6	2	21	29	281100000	1.41	1		170000000	1.164	1		95260000				10	11	6	10	12	7	0.0631	0.0621	0.0422	1.77	0	0	1.77	2061	234.5	6.18	2
IPI00979101.1	Uncharacterized protein	0.2041	9	1	2	3	434700000	1.396	1		18280000	1.629	1		0				2	1		2	1		0.2041	0.1327		0	2.17		2.17	98	11.1	4.78	2
IPI00843876.1	Isoform 2 of Transportin-1	0.0685	8	2	5	5	74200000	1.371	1		0				229800000	1.293	1		2		3	2		3	0.027		0.0416	3.04		2.78	5.82	890	101.2	4.96	2
IPI00386755.2	ERO1-like protein alpha	0.109	1	1	4	8	118200000	1.364	1		26650000	1.498	1		10910000				3	3	1	4	3	1	0.0833	0.0833	0.0256	0	2.4	0	2.4	468	54.4	5.68	2
IPI00170429.3	Isoform 1 of 2-oxoglutarate and iron-dependent oxygenase domain-containing protein 1	0.0886	3	1	5	11	155100000	1.361	1		128200000	0.964	1		158100000	0.999	1		2	4	2	3	5	3	0.0517	0.0646	0.0443	5.65	4.75	5.36	15.76	542	63.2	5.11	3
IPI00884341.2	Isoform 2 of Protein diaphanous homolog 1	0.129	8	2	15	25	382100000	1.359	1		285100000	0.997	1		578600000	1.032	1		7	5	8	9	6	10	0.0713	0.0441	0.0729	0	2.17	1.64	3.81	1248	138.8	5.39	3
IPI00013174.2	Isoform 1 of RNA-binding protein 14	0.1315	2	2	10	20	249700000	1.358	1		85140000	1.119	1		177200000	1.148	1		6	3	5	7	7	6	0.0852	0.0493	0.0882	0	0	0	0	669	69.4	9.67	3
IPI00299177.4	Isoform 1 of Cat eye syndrome critical region protein 5	0.0916	3	1	3	5	832500000	1.354	1		65020000				9490000	0.932	1		2	2	1	2	2	1	0.0636	0.0585	0.0305	0	0	1.6	1.6	393	43.6	6.9	2
IPI00893449.3	Uncharacterized protein	0.1585	5	2	19	29	599300000	1.34	2	35.9	2745000000	0.993	1		155900000	1.203	2	24.5	13	9	5	13	10	6	0.1116	0.0854	0.0488	0	0	0	0	1066	120.9	8.22	3
IPI00022977.1	Creatine kinase B-type	0.3753	4	3	8	21	99050000	1.331	3	0.5	103100000	1.31	3	1.8	82240000	1.321	2	4.1	4	7	1	8	10	3	0.2467	0.2913	0.0446	15.95	16.18	12.53	44.66	381	42.6	5.59	3
IPI00964070.1	Uncharacterized protein	0.3979	4	3	9	19	74770000	1.331	2	8.9	54210000	1.209	2	7.4	179100000	1.303	2	2.1	7	3	4	9	5	5	0.2958	0.169	0.2289	12.96	11.9	8.9	33.76	284	32.1	5.94	3
IPI00910614.1	heterogeneous nuclear ribonucleoprotein R isoform 4	0.3477	5	4	19	39	653200000	1.329	4	40.8	153800000	1.187	2	23.7	1070000000	1.23	3	24.1	15	7	6	22	8	9	0.3064	0.1504	0.1447	1.81	4.27	4.31	10.39	532	59.6	9.16	3
IPI00021187.4	Isoform 1 of RuvB-like 1	0.3596	5	4	14	29	119600000	1.324	2	45.9	1242000000	1.076	4	10	752700000	1.184	2	20.4	7	8	7	7	11	11	0.1469	0.2171	0.2193	4.96	5.83	5.83	16.62	456	50.2	6.42	3
IPI00955044.1	la-related protein 4 isoform f	0.1072	10	1	7	10	18690000	1.324	1		278700000	2.013	1		132800000				2	2	4	3	3	4	0.0413	0.0352	0.0505	0	2.24	0	2.24	653	72.7	6.43	2
IPI00304866.4	Tumor necrosis factor alpha-induced protein 2	0.1024	2	1	6	9	21140000	1.321	1		14690000	1.018	1		104700000				3	1	4	4	1	4	0.0428	0.0168	0.0719	1.64	1.78	0	3.42	654	72.6	6.46	2
IPI00908543.1	cDNA FLJ56133, highly similar to Serine/threonine-protein phosphatase 2A 65 kDa regulatory subunit A alpha isoform	0.2829	5	4	13	33	60890000	1.313	5	48.5	192300000	0.989	4	9.7	50800000	1.004	3	11.2	7	5	7	14	9	10	0.1694	0.1225	0.1712	21.48	18.27	14.62	54.37	555	61.5	5.12	3
IPI00941983.2	Uncharacterized protein	0.1066	3	1	2	4	45550000	1.31	1		26670000	0.966	1		33560000	1.206	1		2	1	1	2	1	1	0.1066	0.0761	0.0761	0	0	0	0	197	21.5	4.42	3
IPI00026089.4	Splicing factor 3B subunit 1	0.1825	2	4	21	36	525900000	1.29	2	10.7	98080000	1.126	3	8.1	404400000	1.497	3	14.6	12	6	9	16	8	12	0.0959	0.0713	0.0943	12.01	14.4	15.91	42.32	1304	145.7	7.09	3
IPI00103467.5	Aldehyde dehydrogenase X, mitochondrial	0.1721	1	1	7	11	304700000	1.288	1		24680000	1.138	1		56920000	1.226	1		4	1	4	4	2	5	0.1161	0.0329	0.089	2.43	4.77	6.46	13.66	517	57.2	6.8	3
IPI00031420.3	UDP-glucose 6-dehydrogenase	0.2895	9	8	11	16	172900000	1.281	5	20.7	56640000	1.154	2	13.9	66420000	0.92	2	7.5	6	3	4	7	4	5	0.1579	0.0729	0.1275	4.47	5.71	9.82	20	494	55	7.12	3
IPI00305289.2	Kinesin-like protein KIF11	0.0947	1	1	10	14	267600000	1.28	1		13120000				38800000	1.142	1		9	1	2	11	1	2	0.0843	0.0104	0.0208	0	0	0	0	1056	119.1	5.64	2
IPI00017672.4	cDNA FLJ25678 fis, clone TST04067, highly similar to PURINE NUCLEOSIDE PHOSPHORYLASE	0.0956	4	2	2	5	35250000	1.273	2	7	26010000	1.753	1		15730000	1.17	1		2	2	1	2	2	1	0.0956	0.0956	0.058	3.57	2.29	1.88	7.74	293	32.5	7.21	3
IPI00019269.3	WD repeat-containing protein 61	0.0656	1	1	1	4	27610000	1.266	1		23900000	1.421	1		19920000	1.339	1		1	1	1	1	2	1	0.0656	0.0656	0.0656	4.36	6.31	3.47	14.14	305	33.6	5.47	3
IPI00293533.4	Nuclear pore glycoprotein p62	0.1015	1	1	4	6	51680000	1.257	1		39500000	1.059	1		25820000	0.879	1		3	2	1	3	2	1	0.0785	0.0498	0.0268	2.43	2.62	2.79	7.84	522	53.2	5.31	3
IPI00964983.1	Uncharacterized protein	0.3901	10	2	10	20	490600000	1.257	1		674500000	2.002	1		80180000	1.607	1		7	4	5	7	7	6	0.2466	0.139	0.2332	0	0	0	0	223	25.6	9.66	3
IPI00965964.3	Uncharacterized protein	0.1726	4	2	18	30	21460000000	1.255	2	17.4	196100000	0.939	1		61160000				12	9	4	13	11	6	0.1416	0.0876	0.031	3.53	4.24	0	7.77	1130	129.1	7.87	2
IPI00219526.6	Isoform 1 of Phosphoglucomutase-1	0.2527	4	6	10	29	90740000	1.254	4	34.8	63750000	1.114	5	18.4	70640000	1.264	2	3	6	5	7	8	10	11	0.1548	0.1708	0.2011	10.13	20.47	18.74	49.34	562	61.4	6.76	3
IPI00952992.2	Uncharacterized protein	0.1336	5	3	5	11	31600000	1.252	1		51200000	0.446	1		19640000				2	4	2	3	5	3	0.0616	0.101	0.0531	6.35	0	0	6.35	584	62.1	6.73	2
IPI00964764.1	cDNA FLJ55072, highly similar to Succinate dehydrogenase (ubiquinone) flavoprotein subunit, mitochondrial	0.1299	5	1	8	16	317700000	1.244	1		196500000				140900000	1.022	1		3	3	5	3	4	9	0.0601	0.0601	0.0893	0	0	2.4	2.4	616	67.3	8.12	2
IPI00012313.3	Golgi phosphoprotein 3-like	0.2596	6	1	6	18	43190000	1.242	1		507200000	1.215	1		29740000	1.166	1		3	4	4	5	8	5	0.1439	0.193	0.1825	0	2.07	0	2.07	285	32.7	5.83	3
IPI00978986.1	140 kDa protein	0.0802	3	2	10	18	17330000	1.242	1		599300000	1.019	2	34	98550000	1.278	3	9	3	5	5	4	7	7	0.0291	0.0421	0.0478	1.99	6.25	6.1	14.34	1235	140.2	5.45	3
IPI00027442.4	Alanyl-tRNA synthetase, cytoplasmic	0.219	2	8	18	49	213300000	1.24	7	10.1	335100000	1.108	9	15.5	268000000	1.161	5	12.6	14	9	9	22	15	12	0.1911	0.124	0.1229	23.85	29.25	20.11	73.21	968	106.7	5.53	3
IPI00013068.1	Eukaryotic translation initiation factor 3 subunit E	0.1303	8	2	5	12	56390000	1.239	1		35270000	0.789	2	19.4	34840000	0.976	3	5.6	2	4	3	3	5	4	0.0494	0.0854	0.1169	0	1.75	1.61	3.36	445	52.2	6.04	3
IPI00792478.1	tubulin alpha-8 chain isoform 2	0.3499	6	1	9	62	1168000000	1.237	1		354900000	1.191	1		765200000	1.18	1		7	7	6	15	22	25	0.2715	0.2715	0.248	26.17	35.63	45.32	107.12	383	42.9	5.08	3
IPI00219365.3	Moesin	0.4003	3	6	27	48	1505000000	1.233	4	23.2	211200000	1.156	3	38.3	105600000	0.8	2	49.1	18	9	7	27	12	9	0.26	0.182	0.1352	12	12.13	11.11	35.24	577	67.8	6.4	3
IPI00020984.2	cDNA FLJ55574, highly similar to Calnexin	0.3078	15	8	17	49	372400000	1.228	7	33.2	790000000	1.102	6	24.3	191900000	1.248	3	7.9	11	12	6	21	17	11	0.185	0.2233	0.1228	10.99	10.92	10.6	32.51	627	71.5	4.7	3
IPI00165579.6	Isoform 2 of Cytosolic non-specific dipeptidase	0.1074	3	1	4	8	34960000	1.226	1		43340000	1.117	1		0				3	1	1	5	1	2	0.0921	0.0537	0.0153	5.3	0	0	5.3	391	43.8	6.48	2
IPI00023728.1	Gamma-glutamyl hydrolase	0.2075	2	2	6	16	55490000	1.224	2	44.7	37040000	0.962	2	4.5	33630000	1.183	3	19.4	5	3	3	8	4	4	0.1792	0.1572	0.1478	11.41	10.84	10.63	32.88	318	35.9	7.11	3
IPI00890837.1	Isoform 1 of Structural maintenance of chromosomes flexible hinge domain-containing protein 1	0.1202	3	2	18	24	3075000000	1.221	2	26.8	655600000				113400000	1.474	1		14	4	3	15	5	4	0.0853	0.0209	0.0334	0	0	5.81	5.81	2005	226.2	7.3	2
IPI00029012.1	Eukaryotic translation initiation factor 3 subunit A	0.2272	3	5	29	54	562000000	1.22	3	1.4	516600000	0.928	3	11.6	203100000	1.102	2	15.7	12	10	16	15	16	23	0.1078	0.0868	0.1172	4.71	6.33	4.58	15.62	1382	166.5	6.79	3
IPI01010722.2	Glycylpeptide N-tetradecanoyltransferase	0.2784	8	1	12	23	945100000	1.22	1		649200000				630800000	1.412	1		8	3	5	11	5	7	0.1526	0.0515	0.1691	4.05	1.78	3.76	9.59	485	56.5	9.33	2
IPI00900293.1	filamin-B isoform 1	0.1067	9	9	20	40	228200000	1.219	7	19.1	294000000	0.983	2	7.4	242200000	0.962	2	2.1	13	11	7	16	15	9	0.0775	0.0608	0.0361	13.9	4.54	4.24	22.68	2633	281.5	5.71	3
IPI00246058.10	Programmed cell death 6-interacting protein	0.1509	2	2	11	19	47330000	1.217	2	8.3	55170000	1.224	2	2.8	27910000	1.025	2	11.6	6	6	5	6	6	7	0.0991	0.0956	0.0795	3.73	6.61	6.47	16.81	868	96	6.52	3
IPI00847300.1	Similar to Voltage-dependent anion-selective channel protein 1	0.1952	3	1	3	8	151900000	1.216	1		206000000	1.167	2	9	51090000	1.097	1		2	1	2	2	3	3	0.1474	0.0797	0.1275	2.05	0	0	2.05	251	27.7	9.22	3
IPI00792841.2	cDNA FLJ46620 fis, clone TLUNG2000654, highly similar to Keratin, type II cytoskeletal 7	0.4427	50	7	20	55	1189000000	1.215	5	5.1	2009000000	1.469	2	55.1	1523000000	1.022	3	4.8	14	13	11	23	18	14	0.3124	0.2697	0.2315	5	6.11	2.03	13.14	445	49	5.48	3
IPI00014898.3	Isoform 1 of Plectin	0.2103	12	11	90	143	598800000	1.212	5	29.2	25610000000	0.986	4	5.2	446800000	1.197	4	13.1	45	31	35	54	42	47	0.1189	0.0845	0.0948	6.78	6.99	5.96	19.73	4684	531.5	5.96	3
IPI00981773.1	cDNA FLJ53377, highly similar to Procollagen-lysine, 2-oxoglutarate 5-dioxygenase 1	0.1333	3	4	7	13	50690000	1.211	2	47.1	138300000	1.166	2	79.8	39760000	1.734	2	125.2	4	4	3	5	5	3	0.0884	0.071	0.0594	2.11	5.21	0	7.32	690	79.3	7.02	3
IPI00917192.2	cDNA FLJ58509, highly similar to Cullin-1	0.1778	3	1	11	19	707800000	1.208	1		145300000				1346000000	0.891	1		5	4	6	5	5	9	0.091	0.0697	0.1038	0	0	0	0	703	81.5	7.62	2
IPI00413641.7	Aldose reductase	0.1709	5	2	5	10	398200000	1.205	2	10.3	135100000	1.245	1		82330000	1.252	1		4	1	2	5	2	3	0.1329	0.0601	0.0981	0	0	2.39	2.39	316	35.8	6.98	3
IPI00922081.1	Fructose-bisphosphate aldolase	0.1638	4	2	3	11	52420000	1.204	1		43490000	1.082	2	2.7	30450000	1.134	2	8.4	2	2	3	3	3	5	0.108	0.108	0.1638	10.57	8.38	8.74	27.69	287	31.1	7.08	3
IPI00169383.3	Phosphoglycerate kinase 1	0.6091	5	15	20	79	718200000	1.201	13	16.9	583700000	1.183	12	12.3	555300000	1.166	7	4.3	16	13	11	31	25	23	0.5012	0.4508	0.4173	56.8	59.08	54.17	170.05	417	44.6	8.1	3
IPI00300127.4	N-acetyltransferase 10	0.198	4	4	17	31	211000000	1.198	2	7.3	50570000	1.152	4	5.6	109700000	1.18	2	8.2	8	8	7	11	11	9	0.122	0.0985	0.0829	6.66	14.13	7.91	28.7	1025	115.7	8.27	3
IPI00329791.20	Probable ATP-dependent RNA helicase DDX46	0.1242	3	1	10	14	914000000	1.198	1		39860000	1.178	1		471600000				4	5	3	6	5	3	0.0417	0.0611	0.0514	1.85	1.63	0	3.48	1031	117.3	9.29	2
IPI01011685.1	Uncharacterized protein	0.2359	3	2	4	9	300100000	1.198	1		33520000	1.066	1		79010000				3	2	2	4	3	2	0.1901	0.1056	0.0915	6.45	8.03	3.06	17.54	284	31.4	5.97	2
IPI00411690.1	Isoform 2 of La-related protein 1	0.1992	5	1	22	47	778000000	1.196	1		211200000	1.408	1		466800000	1.538	1		14	9	12	18	14	15	0.1433	0.105	0.1501	4.39	6.07	5.91	16.37	1019	116.4	9.09	3
IPI01010766.1	Uncharacterized protein	0.2784	4	1	4	11	88960000	1.195	1		29950000	1.194	1		45730000	1.001	1		3	3	2	4	4	3	0.1875	0.2102	0.1193	1.69	3.49	4.02	9.2	176	19.4	6.68	3
IPI00745502.2	26S protease regulatory subunit 8 isoform 2	0.3417	3	2	11	15	65800000	1.192	1		15420000	0.722	1		97890000	0.755	2	54.6	6	2	6	6	2	7	0.1935	0.0578	0.191	2.68	1.95	2.82	7.45	398	44.8	8.18	3
IPI00026108.2	Cytosolic phospholipase A2	0.1095	2	1	7	18	15610000	1.188	1		82970000	1.582	1		28330000	1.478	1		4	4	4	10	4	4	0.0734	0.0681	0.0668	2.63	2.51	0	5.14	749	85.2	5.38	3
IPI00030363.1	Acetyl-CoA acetyltransferase, mitochondrial	0.1593	3	3	4	10	70470000	1.187	2	14.9	185700000	1.049	1		90120000	1.081	1		3	1	2	5	2	3	0.096	0.0398	0.103	5.43	5.26	2.47	13.16	427	45.2	8.85	3
IPI00297779.7	T-complex protein 1 subunit beta	0.3813	5	9	17	45	326900000	1.184	7	7.1	189500000	1.195	7	19.9	160200000	1.048	5	20.4	9	10	10	12	17	16	0.2449	0.2299	0.2523	13.23	14.6	13.41	41.24	535	57.5	6.46	3
IPI00027223.2	Isocitrate dehydrogenase [NADP] cytoplasmic	0.2343	4	4	7	14	222700000	1.181	4	31.4	180300000	1.491	2	84	50410000	2.889	1		6	4	2	7	5	2	0.2101	0.1449	0.0725	0	6.03	3.47	9.5	414	46.6	7.01	3
IPI00470883.2	Isoform 2 of Cohesin subunit SA-2	0.1443	3	1	15	25	3271000000	1.178	1		111300000	1.097	1		3604000000				9	4	6	12	4	9	0.0899	0.0323	0.067	2	0	1.75	3.75	1268	145.7	5.52	2
IPI00334190.4	Stomatin-like protein 2	0.1657	3	3	4	6	103900000	1.176	1		66700000	1.046	2	18.1	43020000	0.972	2	25.8	1	2	3	1	2	3	0.0421	0.073	0.1348	3.4	3.18	3.22	9.8	356	38.5	7.39	3
IPI00003505.3	Isoform 1 of Pachytene checkpoint protein 2 homolog	0.1111	2	1	3	4	217700000	1.175	1		10820000	1.159	1		119400000				2	1	1	2	1	1	0.0856	0.0602	0.0255	0	2.24	0	2.24	432	48.5	6.09	2
IPI00748411.2	Serine hydroxymethyltransferase	0.4074	18	9	20	37	356600000	1.169	8	11.3	172000000	1.086	3	2.6	142500000	1.057	2	1.6	17	4	4	24	6	7	0.3528	0.115	0.1092	2.07	4.37	1.91	8.35	513	56.3	9.42	3
IPI00917117.1	FAM129B protein (Fragment)	0.2018	4	1	6	15	17470000	1.169	1		54510000	1.005	1		107100000	1.321	1		2	4	4	3	6	6	0.0765	0.1407	0.1193	3.87	3.8	0	7.67	327	35.2	6.57	3
IPI00455315.4	Isoform 1 of Annexin A2	0.5398	5	10	17	52	1236000000	1.168	10	8.7	501600000	1.029	8	9.4	521000000	1.086	8	7	11	8	9	19	16	17	0.4366	0.3333	0.3746	35.51	27.69	18.69	81.89	339	38.6	7.75	3
IPI00024255.2	G patch domain and KOW motifs-containing protein	0.2311	2	1	11	15	55650000	1.167	1		25300000	1.21	1		37690000	0.979	1		6	3	4	6	4	5	0.1176	0.084	0.1218	1.72	0	0	1.72	476	52.2	6.15	3
IPI00013933.2	Isoform DPI of Desmoplakin	0.1787	4	2	53	133	5926000000	1.167	1		25370000000	1.302	1		25140000000				24	21	18	45	45	43	0.0913	0.0693	0.0658	0	0	0	0	2871	331.6	6.81	2
IPI00027497.5	Glucose-6-phosphate isomerase	0.3799	4	11	16	62	923100000	1.165	10	8.5	457700000	1.108	8	11.5	322800000	1.213	6	10.6	12	9	9	25	17	20	0.267	0.2616	0.2043	35.2	33.57	32.68	101.45	558	63.1	8.32	3
IPI00298622.1	Intestinal-type alkaline phosphatase	0.1591	1	2	6	23	396500000	1.163	3	3.5	419400000	1.007	3	8.4	157500000	1.169	2	7.2	3	6	2	6	12	5	0.0909	0.1591	0.0663	7.28	15.28	15.14	37.7	528	56.8	5.86	3
IPI00798400.1	Isoform D of Eukaryotic translation initiation factor 4 gamma 1	0.1902	23	9	23	46	714500000	1.162	6	13.3	50020000	1.117	5	3.1	415300000	1.175	7	11.8	12	10	14	15	14	17	0.1129	0.092	0.1247	5.64	11.88	6.71	24.23	1435	158.4	5.21	3
IPI00981395.1	cDNA FLJ53442, highly similar to Poly (ADP-ribose) polymerase 1	0.2316	2	3	16	43	493000000	1.161	2	0.7	171400000	1.095	2	5.8	337300000	1.072	4	9.1	8	6	12	12	12	19	0.1158	0.0906	0.1772	11.97	17.56	18.77	48.3	993	111.1	8.87	3
IPI00166749.3	Mitochondrial-processing peptidase subunit alpha	0.0743	2	1	3	8	33620000	1.154	1		121800000	1.059	2	3.2	42690000	0.883	1		1	2	2	1	4	3	0.0324	0.0533	0.0533	4.1	5.38	2.98	12.46	525	58.2	6.92	3
IPI00102069.5	Eukaryotic translation initiation factor 3 subunit M	0.1979	5	2	7	14	80350000	1.153	1		501100000	1.023	2	7.5	55840000	1.007	1		3	5	2	4	7	3	0.0989	0.1711	0.0882	0	1.84	0	1.84	374	42.5	5.63	3
IPI00329801.12	Annexin A5	0.2688	6	6	7	39	337300000	1.151	7	13.6	345200000	1.06	3	21.5	309200000	1.061	5	6.6	7	4	5	15	11	13	0.2688	0.1813	0.2156	23.57	12.26	20.85	56.68	320	35.9	5.05	3
IPI00797037.2	95 kDa protein	0.1859	5	6	15	24	3062000000	1.15	4	13.7	427800000	1.12	2	10.8	26890000	1.422	1		8	8	3	11	9	4	0.1059	0.0906	0.0388	4.31	9.96	6.02	20.29	850	95.2	6.81	3
IPI00294398.2	Isoform 1 of Hydroxyacyl-coenzyme A dehydrogenase, mitochondrial	0.3822	3	3	9	18	87890000	1.149	2	20.8	60910000	1.002	2	1.1	62820000	1.169	2	14.4	4	5	3	7	6	5	0.2134	0.2707	0.1624	5.56	10.55	8.39	24.5	314	34.3	8.85	3
IPI00008530.1	60S acidic ribosomal protein P0	0.6088	16	7	19	39	284400000	1.148	7	12.6	257100000	1.033	4	9.6	381000000	1.034	4	4.7	15	5	6	21	9	9	0.4953	0.3218	0.2934	20.03	22.96	16.19	59.18	317	34.3	5.97	3
IPI00848226.1	Guanine nucleotide-binding protein subunit beta-2-like 1	0.3218	19	4	8	14	192600000	1.145	2	17	72090000	1.074	2	5.2	201200000				6	3	2	8	4	2	0.2461	0.1514	0.0883	0	3.28	0	3.28	317	35.1	7.69	2
IPI00783097.4	Glycyl-tRNA synthetase	0.2179	1	3	13	23	115400000	1.143	2	34.4	212200000	1.196	3	2.7	147400000	1.255	3	13	7	7	4	8	10	5	0.1353	0.1137	0.0866	4.36	11.17	10.71	26.24	739	83.1	7.03	3
IPI00946351.1	Uncharacterized protein	0.1574	5	1	7	10	57440000	1.142	1		43570000	0.741	1		623200000	0.992	1		3	4	2	4	4	2	0.083	0.0917	0.0554	0	0	0	0	578	65.3	5.19	3
IPI00154451.9	cDNA FLJ55586, highly similar to MMS19-like protein	0.0381	6	1	4	9	179000000	1.142	1		178800000				22650000	1.145	1		2	4	1	4	4	1	0.019	0.0381	0.0114	0	0	1.92	1.92	1051	115.7	6.48	2
IPI01009501.1	Uncharacterized protein	0.5342	21	2	6	25	938600000	1.142	1		641100000				58480000	0.788	1		5	3	2	14	9	2	0.5342	0.3851	0.3354	3.37	0	0	3.37	161	18.2	8.32	2
IPI00892637.1	cDNA FLJ59990, highly similar to Rattus norvegicus basic leucine zipper and W2 domains 2 (Bzw2), mRNA	0.4348	8	1	5	8	132200000	1.139	1		113500000	0.868	1		19730000	0.931	1		4	2	1	5	2	1	0.3727	0.1801	0.118	0	1.8	0	1.8	161	18.7	9.48	3
IPI00026230.1	Heterogeneous nuclear ribonucleoprotein H2	0.3163	19	4	11	23	186300000	1.137	3	4.6	184900000	1.158	4	24.8	114400000	1.064	4	8	7	5	5	8	7	8	0.2027	0.1581	0.1604	1.99	7.15	7.72	16.86	449	49.2	6.3	3
IPI01022863.1	Citrate synthase	0.22	17	3	7	16	336600000	1.136	2	16.7	92220000	1.03	2	3.5	121200000	1.01	2	6	6	3	2	9	4	3	0.185	0.115	0.0675	10.57	7.17	5.54	23.28	400	44.7	7.18	3
IPI01009186.1	cDNA FLJ58476, highly similar to Poly(rC)-binding protein 2	0.3389	24	2	9	22	452700000	1.134	1		173900000	1.044	2	22.4	333500000	1.046	2	25.9	6	3	5	8	6	8	0.2425	0.1329	0.186	5.22	4.11	5.56	14.89	301	32.1	7.9	3
IPI00783271.1	Leucine-rich PPR motif-containing protein, mitochondrial	0.3142	6	18	33	82	346000000	1.132	14	15.5	398100000	1.05	14	6.5	228700000	0.944	10	21	25	16	18	35	23	24	0.2267	0.1829	0.2016	26.12	33.32	30.74	90.18	1394	157.8	6.13	3
IPI00420014.2	Isoform 1 of U5 small nuclear ribonucleoprotein 200 kDa helicase	0.1704	7	8	31	51	194000000	1.131	5	21.6	141700000	1.33	4	13.8	224200000	1.358	2	5.6	19	13	6	27	17	7	0.1156	0.0796	0.0309	13.03	20.22	4.4	37.65	2136	244.4	6.06	3
IPI00383296.5	Isoform 2 of Heterogeneous nuclear ribonucleoprotein M	0.3401	4	4	20	52	1148000000	1.13	4	14.8	262900000	0.563	2	156.6	435200000	1.062	3	9.4	9	7	13	13	17	22	0.1592	0.1447	0.2504	9.2	12.95	11	33.15	691	73.6	8.82	3
IPI00011274.3	Isoform 1 of Heterogeneous nuclear ribonucleoprotein D-like	0.1405	3	1	5	8	138100000	1.126	1		60530000	1.075	1		46470000	1.182	1		4	1	2	4	2	2	0.119	0.0381	0.0595	0	0	0	0	420	46.4	9.57	3
IPI00937471.1	Isoform 2 of Importin-5	0.1495	4	4	11	29	84260000	1.125	4	20	172100000	1.059	3	8.8	83400000	0.964	5	12.4	3	6	7	7	10	12	0.0405	0.0868	0.1022	11.39	9.65	9.03	30.07	1037	116.9	4.96	3
IPI00607787.1	Isoform 3 of UDP-N-acetylhexosamine pyrophosphorylase	0.1152	3	2	5	7	54540000	1.125	1		77350000				44440000	1.226	1		4	1	1	5	1	1	0.094	0.0211	0.0192	0	0	1.7	1.7	521	58.6	6.33	2
IPI00843975.1	Ezrin	0.3259	5	5	16	35	255300000	1.122	4	3.1	149800000	1.073	3	6.9	286500000	1.108	3	5.8	7	8	8	12	11	12	0.128	0.1894	0.186	13.08	6.73	9.85	29.66	586	69.4	6.27	3
IPI00479186.7	Isoform M2 of Pyruvate kinase isozymes M1/M2	0.6817	7	19	29	169	1564000000	1.121	21	11.8	730300000	1.107	27	22	765600000	1.122	23	11.5	18	20	18	57	58	54	0.4821	0.5348	0.4482	115.52	129.02	116.07	360.61	531	57.9	7.84	3
IPI00030781.1	Isoform Alpha of Signal transducer and activator of transcription 1-alpha/beta	0.212	3	4	12	23	829600000	1.12	1		171800000	1.017	2	7.2	210400000	1.423	2	34.1	6	5	7	9	5	9	0.1053	0.1067	0.1147	2.82	4.57	2.98	10.37	750	87.3	6.05	3
IPI00218918.5	Annexin A1	0.4769	4	8	14	38	451000000	1.12	6	5.5	261100000	1.093	5	1.3	242100000	1.06	4	6.5	10	8	7	16	12	10	0.3295	0.3584	0.2659	18.41	19.02	17.49	54.92	346	38.7	7.02	3
IPI00013949.1	Small glutamine-rich tetratricopeptide repeat-containing protein alpha	0.0671	1	1	2	7	88120000	1.117	1		33640000	1.133	1		65870000	1.397	1		1	2	1	2	3	2	0.0415	0.0671	0.0415	0	0	0	0	313	34	4.87	3
IPI00789551.1	Uncharacterized protein	0.3173	18	8	20	39	1341000000	1.117	5	19.9	205900000	1.034	4	7.1	346600000	0.976	6	12.2	14	8	9	18	11	10	0.2447	0.1151	0.1743	17.69	13.61	9.33	40.63	895	99.9	6.04	3
IPI00027626.3	T-complex protein 1 subunit zeta	0.2938	4	5	14	42	229900000	1.116	5	5.6	214500000	1.037	3	3.6	230300000	1.035	4	3.5	6	4	8	13	13	16	0.1299	0.1092	0.1977	14.06	17.88	27.76	59.7	531	58	6.68	3
IPI00217966.9	Isoform 1 of L-lactate dehydrogenase A chain	0.756	25	15	22	107	2005000000	1.116	18	16.8	1577000000	1.125	12	16.2	1493000000	1.101	9	8.2	16	10	11	48	30	29	0.5693	0.4759	0.491	64.91	58.72	51.77	175.4	332	36.7	8.27	3
IPI00411614.1	WD repeat and HMG-box DNA-binding protein 1	0.0903	3	1	7	11	191500000	1.116	1		908200000	1.056	1		33670000	1.372	1		4	3	2	5	4	2	0.0567	0.0363	0.0221	0	2.28	0	2.28	1129	125.9	5.62	3
IPI00794663.1	cDNA FLJ58687, highly similar to Tubulin alpha-4 chain	0.448	11	1	16	97	1444000000	1.116	1		635700000	1.152	1		942100000	1.14	1		14	11	9	29	33	35	0.3903	0.3279	0.2771	37.93	55.97	68.73	162.63	433	48.3	5.01	3
IPI00893431.2	cDNA FLJ53410, highly similar to Eukaryotic translation initiation factor 3 subunit 9	0.1125	5	3	9	17	134800000	1.116	3	3.8	67550000	1.225	1		215100000				5	2	4	9	3	5	0.0705	0.0298	0.0447	1.89	1.66	0	3.55	738	85.1	5.26	2
IPI00003362.3	78 kDa glucose-regulated protein	0.445	2	14	23	75	835200000	1.115	10	5.2	1012000000	1.052	16	12.1	534200000	1.091	11	13.4	16	19	10	25	30	20	0.3058	0.3532	0.2339	13.03	11.15	13.56	37.74	654	72.3	5.16	3
IPI00016610.2	Poly(rC)-binding protein 1	0.236	2	2	7	11	448100000	1.115	1		267800000	1.115	1		549500000				6	1	1	8	1	2	0.1966	0.0393	0.0309	1.66	0	0	1.66	356	37.5	7.09	2
IPI00465248.5	Isoform alpha-enolase of Alpha-enolase	0.7281	17	16	26	336	2502000000	1.113	33	20	1169000000	1.122	29	12.8	1190000000	1.165	17	12	17	15	14	109	119	108	0.5461	0.5276	0.5069	128.47	216.27	180.13	524.87	434	47.1	7.39	3
IPI00645078.1	Ubiquitin-like modifier-activating enzyme 1	0.2817	9	13	19	61	429600000	1.113	10	12.1	276300000	1.088	10	10.2	231600000	1.116	10	10.7	13	12	11	20	17	24	0.2136	0.1834	0.1654	44.68	34.68	37.41	116.77	1058	117.8	5.76	3
IPI00784154.1	60 kDa heat shock protein, mitochondrial	0.6161	8	23	33	273	2702000000	1.113	35	6.5	2709000000	1.087	32	9.1	2414000000	1.122	27	5	28	22	18	107	84	82	0.5393	0.4887	0.4485	147.49	162.89	162.19	472.57	573	61	5.87	3
IPI00953236.1	glutathione reductase, mitochondrial isoform 2 precursor	0.0507	5	1	3	4	30370000	1.111	1		69560000	1.282	1		0				2	2		2	2		0.0385	0.0365		0	0		0	493	53	8.84	2
IPI00001639.2	Importin subunit beta-1	0.2911	3	11	18	47	1160000000	1.11	6	14	213600000	1.011	6	6.7	174000000	0.993	7	0.8	14	8	8	20	15	12	0.2192	0.1256	0.1484	25.46	25.94	23.62	75.02	876	97.1	4.78	3
IPI00925572.1	asparagine synthetase [glutamine-hydrolyzing] isoform b	0.1759	4	2	8	12	262100000	1.11	1		43350000	1.573	1		97430000				4	3	3	5	3	4	0.0907	0.0759	0.0481	0	2.4	0	2.4	540	62.1	7.06	2
IPI00105598.3	Proteasome 26S non-ATPase subunit 11 variant (Fragment)	0.2293	2	4	8	13	88330000	1.108	3	4.3	56200000	1.051	2	10.4	103800000	0.999	2	1.9	5	2	4	6	2	5	0.1608	0.0686	0.1064	3.8	2.39	5.05	11.24	423	47.5	6.48	3
IPI00642548.2	Uncharacterized protein	0.1182	3	2	6	10	76540000	1.107	1		54710000	1.175	1		61290000				5	3	1	6	3	1	0.0962	0.0842	0.0321	0	2.91	2.23	5.14	499	53.1	6.92	2
IPI00001159.11	Translational activator GCN1	0.1647	1	13	32	72	385800000	1.105	6	14.8	417000000	1.095	10	13.7	80950000	1.202	10	21.1	17	19	16	23	26	23	0.088	0.1052	0.0988	21.38	29.65	36.8	87.83	2671	292.6	7.47	3
IPI00009104.7	RuvB-like 2	0.1987	2	2	7	12	74240000	1.105	2	12.4	26010000	1.229	1		60510000	1.076	1		5	3	1	6	4	2	0.1404	0.095	0.0346	9.16	3.64	7.42	20.22	463	51.1	5.64	3
IPI00893062.1	X-ray repair complementing defective repair in Chinese hamster cells 6	0.5063	4	12	23	59	349600000	1.104	6	15.8	101000000	1.097	12	19	94960000	1.013	8	17.1	17	14	8	23	24	12	0.3828	0.3256	0.2075	16.31	25.9	25.71	67.92	559	64.2	9.28	3
IPI00009342.1	Ras GTPase-activating-like protein IQGAP1	0.2317	2	15	38	68	163100000	1.103	12	30.3	287700000	0.992	5	9.3	138100000	1.1	7	3.1	28	11	10	33	20	15	0.1774	0.0935	0.0887	14.03	30.42	21.45	65.9	1657	189.1	6.48	3
IPI01013219.1	Uncharacterized protein	0.3109	9	4	8	16	759800000	1.098	4	9.8	270500000	1.096	3	9.4	240900000	1.028	2	4.5	8	4	2	9	4	3	0.3109	0.1723	0.0974	3.96	2.65	5.3	11.91	267	29.7	9.88	3
IPI00022462.2	Transferrin receptor protein 1	0.2684	3	8	14	29	181400000	1.096	7	9.2	92950000	1.038	4	16.8	112000000	1.162	5	17.3	10	6	8	13	7	9	0.225	0.1079	0.1618	9.47	2.9	3.51	15.88	760	84.8	6.61	3
IPI00743335.3	Isoform 1 of Myosin-Ic	0.1806	6	3	20	34	337600000	1.096	1		3287000000	1.053	1		227700000	0.368	1		15	7	7	16	10	8	0.1317	0.063	0.0715	4.17	5.24	0	9.41	1063	121.6	9.41	3
IPI00916833.1	Uncharacterized protein	0.3041	5	2	15	20	602300000	1.096	1		90420000	1.067	1		156800000	1.016	1		9	6	2	10	7	3	0.1996	0.1175	0.0466	5.54	2.28	2.57	10.39	536	62	9.11	3
IPI00003881.5	Heterogeneous nuclear ribonucleoprotein F	0.2747	4	4	9	23	666200000	1.095	3	9.7	850900000	1.206	2	11.7	183400000	1.239	3	5.2	6	5	4	11	6	6	0.1855	0.212	0.159	3.27	11.01	10.99	25.27	415	45.6	5.58	3
IPI00419373.1	Isoform 1 of Heterogeneous nuclear ribonucleoprotein A3	0.3175	4	4	10	22	585600000	1.095	5	8.1	21750000	0.975	2	9.4	30550000				9	3	1	16	4	2	0.2831	0.1402	0.0423	9.87	5.07	4.25	19.19	378	39.6	9.01	2
IPI00018931.6	Vacuolar protein sorting-associated protein 35	0.201	2	4	13	27	2327000000	1.094	3	42.4	132900000	1.139	3	11.8	88400000	0.975	2	3.6	6	6	8	11	8	8	0.0854	0.0992	0.1369	4.23	11.46	4.65	20.34	796	91.6	5.49	3
IPI00219018.7	Glyceraldehyde-3-phosphate dehydrogenase	0.809	5	19	23	180	4945000000	1.094	26	4.8	2447000000	1.083	25	4.2	2418000000	1.077	24	7	17	17	13	61	64	55	0.6448	0.6	0.6119	71.19	102.43	102.91	276.53	335	36	8.46	3
IPI00216952.1	Isoform C of Prelamin-A/C	0.6224	11	18	37	69	1251000000	1.093	13	5.9	265500000	1.064	5	8	412900000	1.131	6	13.5	25	13	11	36	20	13	0.4738	0.2448	0.2762	12.16	6.45	11.68	30.29	572	65.1	6.84	3
IPI01013559.1	cDNA FLJ58502, highly similar to Protein disulfide-isomerase A6	0.27	5	5	9	31	356200000	1.092	5	1.9	262700000	0.924	4	16.6	91930000	0.985	3	17.4	6	7	4	12	13	6	0.1854	0.238	0.1487	7.99	8.88	10.19	27.06	437	47.8	5.08	3
IPI00784295.2	Isoform 1 of Heat shock protein HSP 90-alpha	0.5082	12	10	36	126	2539000000	1.091	10	6	1608000000	1.163	8	14.1	1642000000	1.116	10	7.5	27	17	22	51	36	39	0.3757	0.321	0.3757	42.43	38.61	37.32	118.36	732	84.6	5.02	3
IPI00215911.3	DNA-(apurinic or apyrimidinic site) lyase	0.261	9	3	6	10	60710000	1.09	1		31320000	1.099	3	7.1	56480000	1.076	2	9.5	3	3	3	3	3	4	0.1101	0.1792	0.1352	2.81	7.64	12.39	22.84	318	35.5	8.12	3
IPI00910683.2	cDNA FLJ59557, highly similar to 2-oxoglutarate dehydrogenase E1 component, mitochondrial	0.1604	9	3	12	28	5752000000	1.09	3	45.5	136200000	1.519	2	23.8	156900000	1.036	2	4.4	9	5	6	11	5	12	0.118	0.0699	0.0836	1.92	2.21	1.72	5.85	873	99	7.46	3
IPI00152981.1	Acyl-CoA dehydrogenase family member 9, mitochondrial	0.1208	2	1	8	14	178100000	1.089	1		77450000	0.677	1		85120000	0.776	1		4	4	4	5	5	4	0.066	0.0628	0.0628	2.28	1.65	1.63	5.56	621	68.7	7.96	3
IPI00966854.1	Uncharacterized protein	0.1908	7	1	4	5	412700000	1.089	1		260200000	1.376	1		42230000				1	3	1	1	3	1	0.0459	0.159	0.0318	0	0	0	0	283	30.5	7.91	2
IPI00879904.1	Isoform 2 of Tubulin alpha chain-like 3	0.1108	2	1	4	9	208700000	1.088	1		106400000	1.643	1		142200000				3	3	2	4	3	2	0.0813	0.0813	0.0517	3.61	0	0	3.61	406	45.5	6.32	2
IPI00829908.1	Isoform 2 of U2 snRNP-associated SURP motif-containing protein	0.1975	4	1	19	44	318200000	1.087	1		48720000	1.072	1		73790000	0.965	1		8	10	7	16	15	13	0.1089	0.1304	0.0885	6.55	6.22	5.61	18.38	1028	118.2	8.47	3
IPI00217975.4	Lamin-B1	0.2406	3	3	11	22	238500000	1.086	1		88820000	1.083	1		211700000	1.157	2	11.2	8	5	5	10	6	6	0.1758	0.1365	0.1502	14.06	7.42	4.78	26.26	586	66.4	5.16	3
IPI00304692.1	Heterogeneous nuclear ribonucleoprotein G	0.3197	7	5	11	26	1744000000	1.086	4	9.6	1190000000	1.006	4	4.6	81270000	0.981	1		8	6	3	12	10	4	0.2148	0.1867	0.0639	1.78	2.06	0	3.84	391	42.3	10.05	3
IPI00644576.1	Uncharacterized protein	0.1523	11	12	31	64	262900000	1.084	7	16.7	222400000	0.885	5	28.1	244300000	1.098	3	16.5	18	17	10	23	26	15	0.0967	0.0863	0.0545	5.82	11.09	0	16.91	2607	276.4	6.05	3
IPI00759723.1	Isoform Monomeric of Arginyl-tRNA synthetase, cytoplasmic	0.2075	3	3	9	13	466100000	1.084	2	11	106800000	0.733	1		34690000	1.076	1		5	4	3	6	4	3	0.1003	0.0969	0.0765	0	2.19	0	2.19	588	67.1	6.55	3
IPI00985384.1	ATP-dependent RNA helicase DDX3X isoform 3	0.291	7	6	16	52	239700000	1.084	8	10.7	145000000	1.2	5	13.2	618900000	1.077	5	7.1	11	7	8	19	15	18	0.2059	0.1502	0.1734	17.89	27.21	20.9	66	646	71.3	6.62	3
IPI00554722.1	Isoform 3 of 4F2 cell-surface antigen heavy chain	0.2835	11	6	11	19	597500000	1.084	4	13.3	390200000	1.06	4	24.3	95210000				8	5	2	11	6	2	0.1831	0.1461	0.0704	4.62	9.11	0	13.73	568	61.8	5.21	2
IPI00646055.3	Uncharacterized protein	0.4224	2	8	23	37	221700000	1.083	4	17	662700000	1.024	2	16.7	721000000	0.962	3	7.1	16	5	9	19	6	12	0.2734	0.1321	0.1859	4.5	4.07	1.9	10.47	651	74.2	7.87	3
IPI00414676.6	Heat shock protein HSP 90-beta	0.5511	11	11	40	165	2967000000	1.082	11	4.4	1631000000	1.035	9	10.9	1752000000	1.049	9	1.3	31	22	26	69	46	50	0.453	0.3909	0.4392	51.09	55.56	48.9	155.55	724	83.2	5.03	3
IPI01014604.2	T-complex protein 1 subunit delta	0.336	5	6	13	24	696400000	1.08	2	5.5	135400000	1.101	4	9.7	200500000	1.036	3	4.7	7	6	7	8	8	8	0.1945	0.1729	0.1866	9.99	17.09	5.38	32.46	509	54.7	7.83	3
IPI00922693.1	cDNA FLJ53662, highly similar to Actin, alpha skeletal muscle	0.3469	45	1	11	63	10190000000	1.079	1		7555000000	1.058	2	3.5	1815000000	1.046	2	4	9	7	8	27	20	16	0.2741	0.2128	0.2653	13.01	11.05	7.09	31.15	343	38.6	5.38	3
IPI00027107.5	elongation factor Tu, mitochondrial precursor	0.3978	1	9	16	46	560800000	1.078	10	10.5	215700000	0.996	6	21.5	271100000	1.025	5	5.5	13	6	9	20	11	15	0.3473	0.2088	0.2681	16.05	14.03	16.36	46.44	455	49.8	7.61	3
IPI00909239.1	Isoform 2 of Alpha-actinin-1	0.2289	17	1	20	49	542500000	1.077	1		473600000	1.143	1		316600000	1.353	1		13	10	10	16	18	15	0.1285	0.1488	0.1375	4.13	12.02	7.48	23.63	887	102.6	5.5	3
IPI00514561.1	cDNA FLJ54552, highly similar to Heterogeneous nuclear ribonucleoprotein K	0.5607	7	11	19	63	1203000000	1.076	8	19.4	736600000	1.075	7	4.2	665100000	1.043	9	4.2	15	10	6	29	19	15	0.4416	0.3224	0.2243	35.51	32.09	30.91	98.51	428	47.5	5.63	3
IPI00642046.1	RSL1D1 protein	0.3129	3	3	14	33	240000000	1.076	2	17.5	70670000	1.454	2	54.1	61620000	1.57	2	39.2	6	7	8	11	11	11	0.1104	0.18	0.2188	2.19	6.82	8.28	17.29	489	54.8	10.13	3
IPI00876962.2	Isoform 2 of Inverted formin-2	0.0839	3	2	8	14	134300000	1.075	1		93190000	1.155	2	12.6	19140000	0.848	1		4	5	2	5	6	3	0.0411	0.054	0.025	5.65	9.29	6.48	21.42	1240	134.5	5.53	3
IPI00445401.4	Isoform 2 of E3 ubiquitin-protein ligase HUWE1	0.1021	5	1	41	61	740200000	1.075	1		1749000000				926800000	1.073	1		22	14	15	28	15	18	0.0633	0.0395	0.0363	1.83	1.93	0	3.76	4358	479.9	5.24	2
IPI00186290.6	Elongation factor 2	0.4907	4	22	35	147	6152000000	1.074	26	8.5	511700000	1.091	19	5.4	576600000	1.043	19	7.5	28	20	18	60	45	42	0.3904	0.3485	0.3287	65.95	74.89	70.13	210.97	858	95.3	6.83	3
IPI01012004.1	cDNA PSEC0175 fis, clone OVARC1000169, highly similar to Protein disulfide-isomerase A3	0.3688	5	6	14	38	3029000000	1.074	7	7.7	150300000	1.212	5	16.8	139000000	1.339	5	16.1	13	4	5	22	8	8	0.3688	0.15	0.1604	17.06	19.6	10.27	46.93	480	54.1	7.21	3
IPI00009032.1	Lupus La protein	0.2917	5	5	9	15	79390000	1.073	3	1.5	39920000	0.761	1		142200000	1.103	3	6.2	5	3	5	7	3	5	0.1642	0.0882	0.1765	5.7	2.73	6.9	15.33	408	46.8	7.12	3
IPI00396378.3	Isoform B1 of Heterogeneous nuclear ribonucleoproteins A2/B1	0.5127	4	12	19	88	1122000000	1.071	8	2	654000000	1.114	12	11.5	909200000	1.094	11	12.6	12	11	12	33	27	28	0.3258	0.2833	0.3938	22.09	29.92	28.88	80.89	353	37.4	8.95	3
IPI00219420.3	Structural maintenance of chromosomes protein 3	0.1578	1	2	17	23	1485000000	1.07	1		1518000000	1.034	1		113700000	0.992	2	1.5	8	4	9	8	5	10	0.0887	0.0427	0.0937	4.38	4.16	1.71	10.25	1217	141.5	7.18	3
IPI00303476.1	ATP synthase subunit beta, mitochondrial	0.5161	7	15	17	92	705100000	1.07	14	36.2	623000000	1.049	16	11.2	686300000	1.053	16	14	15	13	12	32	32	28	0.4575	0.4291	0.3932	48.6	48.34	53.81	150.75	529	56.5	5.4	3
IPI00895860.1	Isoform 3 of Mediator of DNA damage checkpoint protein 1	0.1215	12	1	16	25	515200000	1.07	1		27900000	1.068	1		10820000000	1.005	1		5	7	9	6	9	10	0.0455	0.056	0.0688	1.62	2.16	0	3.78	1802	195.9	5.2	3
IPI00219217.3	L-lactate dehydrogenase B chain	0.4641	11	8	12	39	1859000000	1.069	5	10.5	744400000	1.079	8	10.8	731000000	1.113	3	8.4	9	7	7	17	11	11	0.3084	0.2874	0.2814	18.25	16.8	15.4	50.45	334	36.6	6.05	3
IPI00025874.2	Dolichyl-diphosphooligosaccharide--protein glycosyltransferase subunit 1 precursor	0.2616	5	6	13	24	1017000000	1.068	4	7.2	116100000	0.97	3	2.1	115700000	1.07	5	15.5	8	4	7	10	5	9	0.1734	0.082	0.1455	0	5.55	8.85	14.4	646	72.7	6.28	3
IPI00219005.3	Peptidyl-prolyl cis-trans isomerase FKBP4	0.2222	2	3	8	16	74750000	1.068	2	18.2	106900000	0.947	2	26.1	146600000	1.136	1		5	4	3	7	4	5	0.1416	0.1351	0.1024	5.35	5.2	6.14	16.69	459	51.8	5.43	3
IPI00855957.3	Isoform 2 of Far upstream element-binding protein 2	0.1521	3	4	10	15	181000000	1.068	4	21.7	112100000	1.128	1		181800000	1.154	1		10	2	2	11	2	2	0.1521	0.0352	0.031	2.14	0	0	2.14	710	72.9	7.9	3
IPI00304596.3	Non-POU domain-containing octamer-binding protein	0.3397	7	5	17	35	312200000	1.067	6	5.2	1552000000	1.024	3	8.5	456800000	1.127	2	11.1	8	6	9	15	9	11	0.1868	0.1762	0.2335	10.44	14.55	9.72	34.71	471	54.2	8.95	3
IPI01015591.2	Uncharacterized protein	0.1926	2	2	13	16	28730000000	1.067	1		168200000	1.083	1		87040000	1.085	1		7	5	3	7	6	3	0.1033	0.0638	0.0523	2.33	0	1.93	4.26	784	89.4	7.46	3
IPI00027834.3	Heterogeneous nuclear ribonucleoprotein L	0.2649	8	6	12	38	967900000	1.065	6	10.8	341200000	0.98	3	22.3	422400000	0.884	3	7.3	9	7	7	19	9	10	0.2598	0.2071	0.2241	4.71	5.77	2.71	13.19	589	64.1	8.22	3
IPI00304925.5	Heat shock 70 kDa protein 1A/1B	0.3479	13	10	18	73	1558000000	1.065	10	6.2	1179000000	1.071	8	6.4	820000000	1.102	10	7.3	12	13	12	23	23	27	0.248	0.2824	0.2746	16.62	23.07	28.22	67.91	641	70	5.66	3
IPI00002966.2	Heat shock 70 kDa protein 4	0.244	3	8	16	38	104600000	1.064	6	26.5	107200000	1.007	5	8.1	95060000	1.141	4	7.4	10	9	9	14	12	12	0.1702	0.1393	0.1464	19.96	20.93	22.63	63.52	840	94.3	5.19	3
IPI00291175.7	Isoform 1 of Vinculin	0.1801	6	4	14	32	246100000	1.064	4	4.7	354800000	1.253	4	24.3	67900000	1.115	3	5.2	11	6	4	15	9	8	0.152	0.0769	0.0582	12.21	11.38	6.86	30.45	1066	116.6	6.09	3
IPI00306369.3	tRNA (cytosine(34)-C(5))-methyltransferase	0.2373	4	3	11	37	241900000	1.064	4	5.5	58370000	0.97	5	10.1	357300000	1.026	4	10.6	7	6	6	11	14	12	0.1421	0.1304	0.1447	8.7	18.81	5.39	32.9	767	86.4	6.77	3
IPI00930688.1	Tubulin alpha-1B chain	0.4457	23	2	16	124	1815000000	1.064	4	3	1041000000	1.08	4	20.3	1337000000	1.082	5	8.9	15	11	10	38	42	44	0.4191	0.3304	0.3104	55.16	84.95	92.97	233.08	451	50.1	5.06	3
IPI00942979.1	Transketolase	0.5024	7	15	24	97	951600000	1.064	19	9.4	648800000	1.078	12	3.7	696600000	1.08	12	4.6	19	9	14	42	22	33	0.4494	0.2793	0.3612	78.61	62.31	71.75	212.67	623	67.8	7.66	3
IPI00939917.1	Isoform 3 of SWI/SNF-related matrix-associated actin-dependent regulator of chromatin subfamily D member 2	0.147	4	1	7	9	117000000	1.064	1		33670000	1.195	1		100300000				5	1	2	6	1	2	0.1077	0.0414	0.0393	0	0	0	0	483	55.2	9.64	2
IPI01012814.1	Uncharacterized protein	0.1257	6	1	6	13	561500000	1.063	1		79580000	0.935	1		37500000	1.394	2	20.5	3	4	2	5	5	3	0.0668	0.0943	0.0334	0	0	0	0	509	55.3	9.01	3
IPI00045839.3	Isoform 3 of Prolyl 3-hydroxylase 1	0.1194	5	2	9	11	84550000	1.063	1		193800000	1.267	1		56180000				5	4	2	5	4	2	0.0709	0.0609	0.0112	0	0	0	0	804	90.6	5.71	2
IPI00549248.4	Isoform 1 of Nucleophosmin	0.3299	8	5	8	25	223100000	1.061	6	11.4	603900000	0.98	4	17.2	62660000	0.968	4	21.7	5	5	3	10	8	7	0.2109	0.2381	0.1497	20.77	16.77	24.31	61.85	294	32.6	4.78	3
IPI00909064.1	Isoform 2 of Bifunctional coenzyme A synthase	0.1366	3	2	7	22	55870000	1.061	1		34530000	0.932	2	41.1	226500000	0.904	2	48.1	4	4	5	4	9	9	0.0793	0.0826	0.1096	1.68	9.38	2.92	13.98	593	65.3	7.64	3
IPI00003918.6	60S ribosomal protein L4	0.452	4	5	19	58	353100000	1.06	4	14.7	462700000	1.08	6	13	295000000	1.066	4	14.1	11	11	9	23	21	14	0.2904	0.2717	0.2787	15.26	18.61	15.07	48.94	427	47.7	11.06	3
IPI00029079.5	GMP synthase [glutamine-hydrolyzing]	0.1501	3	3	9	19	83680000	1.06	3	5	188200000	1.067	3	0	35890000	1.082	2	6.6	6	6	3	9	7	3	0.1169	0.1082	0.075	17.48	12.48	9.78	39.74	693	76.7	6.87	3
IPI00942143.2	cDNA FLJ51069, highly similar to DNA mismatch repair protein Msh2	0.1806	8	2	11	27	52500000	1.06	2	2.9	250900000	1.064	2	4.7	744400000	1.035	2	14.3	3	8	7	5	10	12	0.0542	0.1333	0.1222	12.07	13.08	12.66	37.81	720	81.3	6.57	3
IPI00295992.4	Isoform 2 of ATPase family AAA domain-containing protein 3A	0.186	6	1	11	34	293400000	1.059	1		302700000	0.939	1		4082000000	0.941	1		7	6	7	14	11	9	0.1468	0.0956	0.1399	7.13	5.18	7.3	19.61	586	66.2	9.25	3
IPI00927101.1	Uncharacterized protein	0.2765	7	4	6	18	190400000	1.057	4	7.3	114500000	0.997	3	3.9	117300000	1.058	2	13.3	5	4	3	8	6	4	0.25	0.1894	0.1629	9.23	12.31	9.7	31.24	264	29.5	5.25	3
IPI00027230.3	Endoplasmin	0.3474	6	14	25	66	510700000	1.055	13	6.6	208200000	1.054	11	9.7	209900000	1.082	9	32.2	21	10	13	31	17	18	0.2752	0.1806	0.2179	22.8	25.29	11.73	59.82	803	92.4	4.84	3
IPI00794900.3	cDNA FLJ56016, highly similar to C-1-tetrahydrofolate synthase, cytoplasmic	0.202	3	7	18	37	193600000	1.054	6	13.2	173500000	0.968	2	6	80400000	1.178	1		13	9	7	16	11	10	0.1627	0.1225	0.0912	11.39	8.79	8.65	28.83	1020	110.4	8.56	3
IPI00966238.2	cDNA FLJ51907, highly similar to Stress-70 protein, mitochondrial	0.4511	5	13	29	81	730000000	1.054	9	18.1	632500000	0.924	10	14	594900000	0.994	10	22.3	20	16	15	31	26	24	0.3504	0.3098	0.3023	20.57	27.4	24.49	72.46	665	72.4	5.94	3
IPI00295851.4	Coatomer subunit beta	0.1396	4	6	13	27	172700000	1.053	1		42210000	1.003	3	11.1	105700000	1.052	3	5.8	5	5	9	6	7	14	0.0619	0.0703	0.0976	4.2	0	3.9	8.1	953	107.1	6.05	3
IPI00604620.3	Nucleolin	0.3493	4	11	24	51	363000000	1.053	9	17.7	852800000	0.918	4	8.2	82610000	1.06	4	9.7	17	9	8	25	13	13	0.2606	0.1676	0.1718	18.44	24.28	18.58	61.3	710	76.6	4.7	3
IPI00014053.3	Isoform 1 of Mitochondrial import receptor subunit TOM40 homolog	0.1163	1	1	3	6	52360000	1.053	1		63120000	1.059	1		85330000				1	2	2	2	2	2	0.0499	0.0859	0.0803	2.23	0	0	2.23	361	37.9	7.25	2
IPI00456969.1	Cytoplasmic dynein 1 heavy chain 1	0.1231	1	10	50	91	560600000	1.052	3	5.4	996300000	1.203	3	13.7	227200000	0.92	6	23.1	22	23	23	29	34	28	0.0562	0.0598	0.0652	7.44	11.85	10.61	29.9	4646	532.1	6.4	3
IPI00947266.1	Uncharacterized protein	0.1476	7	1	7	21	488400000	1.052	1		231900000	1.289	1		23360000	0.971	1		6	5	2	9	9	3	0.1476	0.1189	0.0441	6.78	5.89	6.84	19.51	454	51	7.27	3
IPI00006196.3	Isoform 2 of Nuclear mitotic apparatus protein 1	0.139	4	2	28	52	247200000	1.05	1		255800000	0.989	2	7.9	221000000	1.025	2	17.3	18	13	10	23	15	14	0.0919	0.0733	0.0619	0	9.08	4.22	13.3	2101	236.4	5.8	3
IPI00790702.1	Uncharacterized protein	0.15	6	3	11	14	67300000	1.05	2	76.9	38090000	0.696	2	53.5	439900000	0.631	1		6	5	3	6	5	3	0.0955	0.0864	0.0511	0	4.68	3.85	8.53	880	98.1	5.24	3
IPI00013214.2	cDNA FLJ55599, highly similar to DNA replication licensing factor MCM3	0.2181	2	4	18	30	457000000	1.049	2	18.3	235100000	1.009	1		323400000	0.876	2	10.1	11	6	7	12	7	11	0.1465	0.095	0.1043	7.76	6.79	2.23	16.78	853	95.8	5.77	3
IPI01012685.1	Uncharacterized protein	0.1032	7	2	5	13	1776000000	1.049	2	9.6	22660000	0.984	1		10970000	0.971	2	6	5	3	2	6	4	3	0.1032	0.0788	0.06	7.28	2.62	0	9.9	533	59.6	5.01	3
IPI00295400.1	Isoform 1 of Tryptophanyl-tRNA synthetase, cytoplasmic	0.2357	12	2	7	9	33460000	1.048	2	8.4	11610000	0.76	1		53250000				4	2	2	5	2	2	0.121	0.0913	0.0679	1.71	2.83	0	4.54	471	53.1	6.23	2
IPI00894161.1	HLA-B associated transcript 1	0.2369	30	3	6	8	71480000	1.048	3	20.1	565500000				117800000	0.907	1		3	1	3	4	1	3	0.1077	0.04	0.1508	0	0	0	0	325	38	8.95	2
IPI00290142.5	CTP synthase 1	0.1777	3	1	9	16	580800000	1.047	1		66510000	1.012	2	6.6	670200000	1.058	2	0.5	4	3	5	5	4	7	0.088	0.0795	0.1032	4.8	5.86	3.24	13.9	591	66.6	6.46	3
IPI00383581.4	cDNA FLJ61290, highly similar to Neutral alpha-glucosidase AB	0.3688	7	19	33	82	422600000	1.045	18	12.1	344900000	1.014	13	6.7	195800000	1.061	6	4.7	24	17	13	40	25	17	0.3216	0.2452	0.2131	35.24	16.17	21.28	72.69	995	112.9	6.06	3
IPI00554648.3	Keratin, type II cytoskeletal 8	0.3292	53	8	16	38	643300000	1.045	4	18.5	1229000000	1.011	2	3	315000000	0.974	5	3.4	7	10	10	12	13	13	0.1429	0.1946	0.2381	2.14	4.21	9.86	16.21	483	53.7	5.59	3
IPI01022070.1	Uncharacterized protein	0.3964	21	6	15	49	1326000000	1.045	7	5.5	294800000	1.056	6	6.8	117600000	1.037	4	7.1	12	4	5	24	13	12	0.312	0.1688	0.1944	30.13	32.19	27.01	89.33	391	43.7	5.35	3
IPI00163187.10	Fascin	0.2292	2	3	9	17	89160000	1.045	3	37.5	35630000	1.052	2	11	37280000				4	4	3	8	5	4	0.0953	0.1217	0.1136	9.77	8.04	8.33	26.14	493	54.5	7.24	2
IPI00005154.1	FACT complex subunit SSRP1	0.1537	1	1	9	23	471900000	1.044	1		139000000	1.081	1		41630000	1.118	1		6	5	3	8	10	5	0.0931	0.086	0.0465	1.81	3.7	0	5.51	709	81	6.87	3
IPI00916111.3	Malate dehydrogenase, cytoplasmic	0.3832	8	5	9	19	171500000	1.043	4	6.2	56110000	1.517	2	81.8	47710000	0.99	2	2.7	6	5	3	7	7	5	0.2874	0.2156	0.1347	7.11	4.21	5.97	17.29	334	36.4	7.36	3
IPI01011073.2	Uncharacterized protein	0.1934	2	2	13	29	543900000	1.043	1		623100000	0.524	1		719000000	1.012	1		4	7	9	7	10	12	0.0723	0.1041	0.1456	4.29	3.86	4.69	12.84	941	106.7	7.03	3
IPI00296337.2	Isoform 1 of DNA-dependent protein kinase catalytic subunit	0.2105	2	31	78	133	2100000000	1.04	20	13.7	426400000	1.241	9	27	462800000	1.088	10	31.2	45	31	34	56	39	38	0.1315	0.0974	0.1027	36.69	45.43	27.83	109.95	4128	468.8	7.12	3
IPI00889534.1	carbamoyl-phosphate synthase [ammonia], mitochondrial isoform a precursor	0.4575	6	38	63	195	4043000000	1.039	33	8.1	1170000000	1.04	29	8.6	1236000000	1.034	23	10.7	48	36	33	82	61	52	0.3938	0.3008	0.2842	64.71	60.11	57.99	182.81	1506	165.5	6.79	3
IPI00025491.1	Eukaryotic initiation factor 4A-I	0.5025	13	8	21	63	469400000	1.038	8	18.5	128800000	1.017	4	22	195900000	0.936	3	21.5	17	8	8	34	16	13	0.3892	0.2537	0.2759	18.29	16.22	12.56	47.07	406	46.1	5.48	3
IPI00552072.2	Uncharacterized protein	0.3214	7	9	14	29	164100000	1.036	7	12.4	131600000	0.96	3	9.5	93820000	1.295	2	28.7	10	6	5	14	8	7	0.2375	0.1796	0.1457	6.84	1.85	7.24	15.93	501	54.7	7.64	3
IPI00983539.2	Uncharacterized protein	0.2083	16	7	10	38	197000000	1.036	6	33.4	284100000	1.506	3	4.7	103000000	1.489	5	54.9	9	6	6	17	9	12	0.1652	0.1274	0.1618	16.98	10.94	18.37	46.29	581	63.9	7.87	3
IPI00302925.4	59 kDa protein	0.2834	5	6	13	30	300000000	1.035	6	28.2	185900000	1.247	1		118100000	1.174	2	11.4	10	5	3	19	7	4	0.2066	0.1298	0.075	6.82	5.07	4.4	16.29	547	59.4	5.78	3
IPI00179964.5	Isoform 1 of Polypyrimidine tract-binding protein 1	0.2674	18	8	10	71	382200000	1.034	14	16.9	364100000	0.927	10	10	348700000	0.963	9	11	10	7	5	28	24	19	0.2674	0.209	0.1544	55.88	51.38	50.99	158.25	531	57.2	9.17	3
IPI00220834.8	X-ray repair cross-complementing protein 5	0.3005	2	7	17	66	246600000	1.034	9	6.2	244900000	1.111	11	5.5	251900000	1.114	10	11.5	14	10	7	23	23	20	0.2664	0.2213	0.1776	30.29	48.17	41.11	119.57	732	82.7	5.81	3
IPI00979136.1	Ribonucleoside-diphosphate reductase	0.3333	8	12	20	61	1072000000	1.032	10	31	529400000	1.082	10	32.6	421300000	1.089	8	13.7	13	12	11	27	18	16	0.2533	0.2283	0.2165	23.36	26.63	10.8	60.79	762	86.4	6.65	3
IPI00296053.3	Isoform Mitochondrial of Fumarate hydratase, mitochondrial	0.3686	2	8	13	47	302700000	1.031	6	7.5	210600000	1.064	7	9.3	172200000	1.194	7	28.7	9	9	10	15	14	18	0.3059	0.2902	0.3373	28.6	26.67	29.14	84.41	510	54.6	8.76	3
IPI00003927.5	Peptidyl-prolyl cis-trans isomerase D	0.1027	1	1	3	5	44380000	1.031	1		34750000	1.119	1		25390000				2	2	1	2	2	1	0.0703	0.0649	0.0324	0	0	0	0	370	40.7	7.21	2
IPI00014230.1	Complement component 1 Q subcomponent-binding protein, mitochondrial	0.3475	1	3	7	17	314300000	1.029	3	26	45230000	1.018	1		27630000	0.981	1		5	3	4	5	6	6	0.2801	0.2021	0.195	10.25	6.68	10.64	27.57	282	31.3	4.84	3
IPI00465439.5	Fructose-bisphosphate aldolase A	0.3764	2	7	11	36	830600000	1.029	8	3.7	445100000	1.077	5	6.1	227900000	1.124	5	23.4	9	6	4	16	12	8	0.3379	0.261	0.1868	17.19	22	16.73	55.92	364	39.4	8.09	3
IPI00021439.1	Actin, cytoplasmic 1	0.6187	52	7	16	185	14350000000	1.028	24	15.3	7860000000	1.066	16	12.5	7719000000	1.045	17	7.8	15	13	12	72	59	54	0.5893	0.5333	0.5093	98.46	110.59	111.02	320.07	375	41.7	5.48	3
IPI00790342.2	60S ribosomal protein L6	0.474	7	6	13	33	532200000	1.028	5	15.5	308500000	1.022	3	4.9	290200000	1.03	2	1.3	10	4	6	14	10	9	0.3875	0.1696	0.2491	14.64	8.69	10.82	34.15	289	32.9	10.58	3
IPI00795913.1	4-hydroxyphenylpyruvate dioxygenase isoform 2	0.1497	2	2	4	7	49050000	1.028	1		30040000	0.97	1		28390000	1.097	1		2	2	1	3	3	1	0.065	0.0847	0.0395	2.42	0	2.9	5.32	354	40.5	6.34	3
IPI01013091.1	Uncharacterized protein	0.1026	4	1	3	7	22430000	1.028	1		28630000	0.9	1		0				2	3		3	4		0.0828	0.1026		7.24	7.43		14.67	302	34.5	6.46	2
IPI01011531.3	cDNA FLJ54149, highly similar to Annexin A7	0.253	4	2	7	10	82860000	1.027	1		45060000	1.35	1		71910000	1.272	1		5	1	3	5	1	4	0.1935	0.0506	0.1101	2.02	2.82	0	4.84	336	37.8	7.18	3
IPI00160581.1	Isoform 3 of Testisin	0.09	4	1	2	3	72680000	1.027	1		8960000	0.972	1		0				2	1		2	1		0.09	0.0367		0	0		0	300	33.5	7.69	2
IPI00015953.3	Isoform 1 of Nucleolar RNA helicase 2	0.2273	5	4	19	30	1172000000	1.026	3	0.1	99960000	0.979	1		57160000	0.885	2	8.6	13	7	4	16	8	6	0.1622	0.1213	0.0702	8.71	3.11	6.57	18.39	783	87.3	9.28	3
IPI00844578.1	ATP-dependent RNA helicase A	0.2795	2	16	32	62	555600000	1.025	12	27.6	664300000	0.996	5	2.2	151200000	1.063	7	27	19	13	12	25	20	17	0.178	0.1386	0.1118	15.44	14.31	17.14	46.89	1270	140.9	6.84	3
IPI00026215.1	Flap endonuclease 1	0.1237	1	1	5	11	75330000	1.025	1		97850000				14500000	0.961	1		4	3	2	5	4	2	0.1026	0.0474	0.0737	0	0	2.77	2.77	380	42.6	8.62	2
IPI00619903.3	Isoform 2 of UDP-glucose:glycoprotein glucosyltransferase 1	0.0816	2	3	10	17	309300000	1.025	1		184600000	1.12	2	26.7	161200000				5	6	3	6	8	3	0.0353	0.0464	0.0353	1.75	0	0	1.75	1531	174.9	5.6	2
IPI00375380.4	Isoform 2 of 26S proteasome non-ATPase regulatory subunit 13	0.2566	7	2	8	16	225900000	1.024	1		320400000	0.931	1		295600000	0.983	1		6	3	3	7	5	4	0.2169	0.127	0.1032	8.28	5.17	2.7	16.15	378	42.9	6.54	3
IPI00783982.1	Coatomer subunit gamma	0.1773	2	6	10	27	191300000	1.024	5	14.5	85190000	0.996	7	28.6	63310000	0.964	3	9.3	7	9	3	8	14	5	0.1259	0.1625	0.0526	14	13.59	6.95	34.54	874	97.7	5.47	3
IPI00980410.1	Uncharacterized protein	0.1255	3	1	4	9	62450000	1.024	1		182700000	1.025	1		59450000	1.043	1		3	2	1	4	3	2	0.0913	0.0875	0.0532	2.33	0	4.1	6.43	263	28.6	7.61	3
IPI00003865.1	Isoform 1 of Heat shock cognate 71 kDa protein	0.4211	19	16	25	87	1602000000	1.023	14	7.1	1184000000	0.991	13	9.6	777800000	1.062	11	13.1	18	16	10	36	26	25	0.3313	0.3111	0.2322	25.52	23.56	30.16	79.24	646	70.9	5.52	3
IPI00940851.1	ELAV-like protein 1	0.2239	2	2	6	19	161400000	1.023	2	11.5	157900000	1.131	1		29640000	1.139	1		5	3	2	8	7	4	0.1656	0.1411	0.0828	0	2.21	0	2.21	326	36.1	9.17	3
IPI01009513.2	Uncharacterized protein	0.2322	6	9	18	38	105100000	1.023	4	14.7	201700000	1.226	7	36.1	216500000	0.767	4	57.4	12	10	4	15	14	9	0.1544	0.1622	0.0789	9.89	16.03	14.47	40.39	900	101.1	7.17	3
IPI00930205.1	heterogeneous nuclear ribonucleoprotein Q isoform 5	0.2513	7	5	13	26	326300000	1.022	4	2.4	286500000	1.174	2	2	107700000	0.879	2	19.7	9	4	5	14	5	7	0.1444	0.098	0.1373	7.43	6.34	6.62	20.39	561	62.5	7.56	3
IPI00472724.1	Putative elongation factor 1-alpha-like 3	0.3442	8	5	15	58	910000000	1.021	6	7.2	713000000	1.064	5	6.3	612200000	1.066	6	2.8	11	10	6	21	21	16	0.2792	0.2468	0.171	17.96	28.99	31.69	78.64	462	50.2	9.07	3
IPI00642069.4	Uncharacterized protein	0.2432	9	1	5	16	3990000000	1.021	1		1545000000	1.051	1		2435000000	1.03	1		3	4	2	5	7	4	0.1757	0.2072	0.1396	0	3.52	2.11	5.63	222	24.3	8.25	3
IPI00020042.2	Isoform 1 of 26S protease regulatory subunit 6B	0.134	2	1	4	10	34720000	1.02	1		17580000	0.998	1		74040000	0.796	1		3	1	3	4	2	4	0.1005	0.0431	0.1005	6.06	6.92	6.5	19.48	418	47.3	5.21	3
IPI00185146.5	Importin-9	0.1383	1	6	10	27	51650000	1.02	5	21.6	540500000	1.378	5	35.5	58080000	1.075	4	12.9	5	8	4	8	12	7	0.0874	0.123	0.0778	17.91	21.48	21.82	61.21	1041	115.9	4.81	3
IPI00394838.3	cDNA FLJ56442, highly similar to ATP-citrate synthase	0.2611	4	12	26	52	465300000	1.02	7	7	176900000	0.99	6	17.3	179900000	0.939	7	13.3	22	9	9	28	12	12	0.2253	0.1153	0.1258	27.6	14.49	17.45	59.54	1145	125.1	8.18	3
IPI00013452.11	Bifunctional aminoacyl-tRNA synthetase	0.121	3	3	20	29	257200000	1.02	3	11.3	325600000	0.934	2	10.5	1500000000				11	8	5	14	9	6	0.0694	0.0595	0.0463	1.92	6.53	0	8.45	1512	170.5	7.33	2
IPI00010740.1	Isoform Long of Splicing factor, proline- and glutamine-rich	0.3762	3	8	25	53	1549000000	1.019	7	11.6	169900000	1.019	6	2.2	546300000	1.093	8	7.9	15	8	13	21	15	17	0.2603	0.1499	0.239	18.36	14.87	13.27	46.5	707	76.1	9.44	3
IPI00455383.4	Isoform 2 of Clathrin heavy chain 1	0.2819	6	22	39	79	373600000	1.019	16	10.4	183200000	0.963	11	7.8	260500000	0.908	11	27.8	22	18	22	29	23	27	0.1745	0.1611	0.1605	36.86	29.73	33.14	99.73	1639	187.8	5.69	3
IPI00643196.1	cDNA FLJ35278 fis, clone PROST2006579, highly similar to 6-phosphofructokinase type C	0.1997	6	5	13	22	427600000	1.018	2	0.3	58750000	1.281	1		75770000	1.098	2	32.3	8	2	5	11	3	8	0.1044	0.0425	0.0915	1.89	2.25	2.72	6.86	776	85.3	8.59	3
IPI00007752.1	Tubulin beta-2C chain	0.5843	19	4	20	99	959700000	1.017	4	18.5	765700000	1.067	3	6.7	777400000	0.964	4	18	16	15	14	35	30	34	0.4944	0.4562	0.4517	50.47	42.93	54.99	148.39	445	49.8	4.89	3
IPI00644079.4	cDNA FLJ44920 fis, clone BRAMY3011501, highly similar to Heterogeneous nuclear ribonucleoprotein U	0.3453	4	10	24	55	681000000	1.017	8	2.7	1365000000	1.043	6	9.5	360500000	1.052	4	2.6	16	13	8	26	17	12	0.2293	0.2453	0.1373	17.78	26.58	18.42	62.78	750	83	8.79	3
IPI00031522.2	Trifunctional enzyme subunit alpha, mitochondrial	0.2333	3	8	13	31	512600000	1.015	7	7.2	75650000	1.056	7	26.7	65420000	1.001	6	18.8	9	7	6	12	9	10	0.1756	0.1363	0.1114	13.66	14.1	21.33	49.09	763	82.9	9.04	3
IPI00658000.3	Isoform 1 of Insulin-like growth factor 2 mRNA-binding protein 3	0.1537	6	2	7	13	79710000	1.012	1		89910000	0.881	2	28.6	58320000	1.032	1		4	5	3	5	5	3	0.0967	0.1071	0.076	3.51	3.04	3.23	9.78	579	63.7	8.87	3
IPI00925601.1	Uncharacterized protein	0.357	7	10	14	30	128800000	1.012	5	43.4	66090000	0.493	2	132.9	70110000	0.895	4	9.2	8	5	9	13	6	11	0.1946	0.1117	0.247	11.86	8.85	13.24	33.95	591	64.5	6.71	3
IPI00000873.3	Valyl-tRNA synthetase	0.1147	7	6	10	32	568500000	1.008	6	15.1	272200000	1.049	5	22.5	89090000	0.952	2	17.5	6	5	5	12	10	10	0.0759	0.053	0.057	18	10.84	13.9	42.74	1264	140.4	7.59	3
IPI00003818.1	Kynureninase	0.2731	3	4	10	24	322400000	1.008	3	18.2	68580000	1.159	3	13.8	179300000	1.15	2	11.9	10	5	3	12	7	5	0.2731	0.1312	0.0624	10.42	13.14	12.09	35.65	465	52.3	7.03	3
IPI00221394.8	H/ACA ribonucleoprotein complex subunit 4	0.1868	5	1	8	20	11880000000	1.008	1		129500000	0.934	2	29.5	358300000	0.911	1		6	3	3	10	6	4	0.144	0.1031	0.0856	0	5.28	2.01	7.29	514	57.6	9.42	3
IPI00030654.1	Isoform 2 of Cleavage and polyadenylation specificity factor subunit 6	0.2058	5	1	11	32	587100000	1.007	2	4.9	300700000	1.083	2	13.6	380100000	0.958	2	2.9	9	8	4	16	11	5	0.1956	0.1446	0.0952	10.89	7.01	5.43	23.33	588	63.4	7.71	3
IPI00397372.2	probable ATP-dependent RNA helicase DDX47 isoform 2	0.2291	3	2	8	15	68890000	1.007	1		39720000	1.296	1		27310000	1.249	2	36.6	4	3	3	7	4	4	0.1232	0.0936	0.101	6.89	6.21	8.3	21.4	406	45.1	9.25	3
IPI00008524.1	Isoform 1 of Polyadenylate-binding protein 1	0.4292	28	9	23	48	264400000	1.006	7	23.5	124100000	1.026	6	13.5	194300000	1.005	3	0.6	13	11	12	17	14	17	0.2642	0.261	0.25	12.3	8.85	18.28	39.43	636	70.6	9.5	3
IPI00334291.9	Lon protease homolog	0.2167	8	6	19	29	750400000	1.006	2	22.5	62850000	1.236	2	0.7	311600000	1.08	4	39.8	11	5	9	13	6	10	0.1235	0.0791	0.1127	3.64	1.81	1.97	7.42	923	103	6.67	3
IPI00008274.8	Isoform 1 of Adenylyl cyclase-associated protein 1	0.2674	12	3	9	35	383800000	1.005	3	6.8	51170000	1.227	3	31.7	130500000	1.289	3	20	6	5	6	12	12	11	0.1874	0.1789	0.1958	12.29	14.58	13.34	40.21	475	51.9	8.06	3
IPI00418471.6	Vimentin	0.4785	7	10	23	51	1845000000	1.004	6	8.2	1268000000	1.111	3	4.1	1116000000	1.093	2	13.3	15	11	11	26	13	12	0.3498	0.2918	0.3004	5.43	2.26	0	7.69	466	53.6	5.12	3
IPI00744692.1	Transaldolase	0.1454	2	2	7	16	230800000	1.004	2	1.6	165000000	0.993	1		74500000	1.045	1		5	2	3	7	4	5	0.1157	0.0593	0.1009	0	0	0	0	337	37.5	6.81	3
IPI01012504.1	6-phosphogluconate dehydrogenase, decarboxylating	0.3383	5	6	16	32	182600000	1.004	6	25.6	221300000	1.178	5	19.4	87610000	1.273	2	52.1	9	9	5	13	14	5	0.2064	0.2404	0.1277	19.78	18.65	5.26	43.69	470	51.8	7.44	3
IPI00010796.1	Protein disulfide-isomerase	0.3051	5	6	12	33	367700000	1.003	6	14.6	151900000	1.065	3	11.6	99440000	1.107	3	5.2	8	6	5	15	9	9	0.2283	0.1594	0.1752	16.09	8.49	5.29	29.87	508	57.1	4.87	3
IPI00218547.1	Isoform Short of Delta-1-pyrroline-5-carboxylate synthase	0.1627	2	4	11	19	177400000	1.003	3	23.1	36770000	0.979	2	24.3	25290000	0.977	3	14.6	7	2	4	9	3	7	0.0971	0.0265	0.0694	0	2.57	5.78	8.35	793	87	7.12	3
IPI01013021.1	cDNA FLJ52478, highly similar to Eukaryotic translation initiation factor 3 subunit 5	0.149	6	2	2	12	68500000	1.003	1		44490000	1.023	3	1.2	53470000	0.798	3	18.6	1	2	2	2	5	5	0.0913	0.149	0.149	7.91	3.19	6.2	17.3	208	23.2	5.8	3
IPI00003925.6	Isoform 1 of Pyruvate dehydrogenase E1 component subunit beta, mitochondrial	0.1811	6	2	5	7	55200000	1.001	2	0.9	37450000	0.981	1		269200000				3	1	3	3	1	3	0.1226	0.0446	0.1031	4.94	3.66	1.87	10.47	359	39.2	6.65	2
IPI00216691.5	Profilin-1	0.3214	1	1	4	10	91810000	0.999	1		118600000	1.181	1		65340000	1.092	1		3	2	2	4	3	3	0.3214	0.1714	0.1929	4.66	4.63	4.97	14.26	140	15	8.27	3
IPI00877635.1	Ribosomal protein L3, isoform CRA_b	0.2849	7	4	10	21	220100000	0.999	4	15.1	120300000	0.905	3	37.8	66660000	0.936	3	37.4	5	5	5	7	7	7	0.1823	0.188	0.1738	2.46	4.91	2.49	9.86	351	40.2	10.01	3
IPI00450768.7	Keratin, type I cytoskeletal 17	0.4722	28	9	21	49	1533000000	0.998	7	13.5	72470000	0.888	6	17.2	309800000	0.998	5	8.8	18	5	6	26	11	12	0.3773	0.1736	0.1991	9.64	24.19	20.92	54.75	432	48.1	5.02	3
IPI00300371.5	Isoform 1 of Splicing factor 3B subunit 3	0.1446	2	5	15	29	67800000	0.997	4	18.3	388500000	0.917	3	28.2	267200000	1.003	2	5.1	5	9	6	7	13	9	0.0707	0.0937	0.0649	12.95	13.38	10.98	37.31	1217	135.5	5.26	3
IPI00453473.6	Histone H4	0.466	1	1	6	7	115300000	0.997	1		52810000	0.82	1		36030000				4	1	2	4	1	2	0.4563	0.1165	0.2136	0	0	0	0	103	11.4	11.36	2
IPI00216492.1	Isoform 2 of Heterogeneous nuclear ribonucleoprotein H3	0.2024	7	1	4	12	92920000	0.995	1		74660000	0.818	1		70760000	1	1		3	3	2	6	4	2	0.1571	0.1782	0.1329	3.73	3.83	3.66	11.22	331	35.2	6.87	3
IPI00830039.1	Isoform 2 of Splicing factor U2AF 65 kDa subunit	0.1507	2	2	8	18	89140000	0.995	3	20.5	101200000	0.96	3	10.5	101500000	0.908	3	12	4	4	4	6	6	6	0.0849	0.1019	0.0934	2.86	2.92	2.75	8.53	471	53.1	9.09	3
IPI00329633.5	Threonyl-tRNA synthetase, cytoplasmic	0.2932	8	8	18	38	178900000	0.993	6	21.7	158800000	1.379	5	20.1	121900000	0.973	3	13.5	12	10	9	16	12	10	0.1867	0.1798	0.1715	6.23	8.57	6.26	21.06	723	83.4	6.67	3
IPI00383680.3	dolichyl-diphosphooligosaccharide--protein glycosyltransferase subunit 2 isoform 2 precursor	0.0553	7	2	3	7	47340000	0.993	1		69540000	0.907	2	10.4	23430000	0.909	1		2	2	1	3	3	1	0.0358	0.0407	0.0211	0	4.53	0	4.53	615	67.7	6.06	3
IPI00937615.2	Elongation factor 1-gamma	0.357	5	9	14	27	595700000	0.993	7	11.8	99190000	1.083	2	12.4	151200000	1.01	3	13	13	4	5	17	4	6	0.3432	0.1419	0.151	1.81	0	4.81	6.62	437	50.1	6.67	3
IPI00025273.1	Isoform Long of Trifunctional purine biosynthetic protein adenosine-3	0.1881	10	6	14	21	151800000	0.993	4	19	212800000				146300000	1.217	1		7	8	4	8	9	4	0.1069	0.1188	0.0485	8.85	6.5	1.81	17.16	1010	107.7	6.7	2
IPI00032140.4	Serpin H1	0.5072	13	10	16	46	559600000	0.992	7	14.4	235300000	0.966	7	11.2	146200000	0.918	9	12.2	12	9	8	18	16	12	0.4139	0.3254	0.2943	25.02	29.71	21.47	76.2	418	46.4	8.69	3
IPI01011937.1	Uncharacterized protein	0.087	11	1	5	12	39130000	0.99	1		48680000	1.093	1		51970000	1.088	1		3	4	4	4	4	4	0.0557	0.0679	0.0679	4.54	2.48	5.11	12.13	736	82.9	7.46	3
IPI00005024.3	Isoform 1 of Myb-binding protein 1A	0.2131	4	6	19	47	109400000	0.988	5	86	37140000	0.828	4	34.2	141000000	0.917	3	46.8	11	9	10	19	13	15	0.122	0.1077	0.1152	20.98	14.18	14.45	49.61	1328	148.8	9.28	3
IPI00440493.2	ATP synthase subunit alpha, mitochondrial	0.5244	3	16	26	71	604600000	0.988	15	10.9	473700000	1.056	9	10.4	441000000	1.024	11	5.3	20	11	13	31	19	21	0.4268	0.302	0.3219	29.86	30.69	31.16	91.71	553	59.7	9.13	3
IPI01022801.1	Uncharacterized protein	0.4539	20	6	15	65	1957000000	0.985	5	6.9	1305000000	1.008	5	22.4	1446000000	1.086	4	15.3	13	6	7	26	19	20	0.4441	0.2368	0.2697	18.72	22.76	18.69	60.17	304	32.7	9.44	3
IPI00007402.3	Importin-7	0.0848	2	4	7	16	104000000	0.981	2	69.4	42810000	0.961	3	5.3	674100000	1.085	3	0.3	4	4	4	4	6	6	0.0482	0.0511	0.0568	6.29	8.55	11.86	26.7	1038	119.4	4.82	3
IPI00028031.2	cDNA FLJ56425, highly similar to Very-long-chain specific acyl-CoAdehydrogenase, mitochondrial	0.224	5	7	13	18	198800000	0.981	2	21.3	1129000000	1.063	2	35.9	25200000	1.507	1		7	4	4	9	4	5	0.1298	0.097	0.0613	0	1.87	4.67	6.54	701	75.2	9.04	3
IPI00297084.7	Dolichyl-diphosphooligosaccharide--protein glycosyltransferase 48 kDa subunit	0.1031	2	2	5	5	67670000	0.979	1		274000000	0.858	1		0				1	4		1	4		0.0197	0.0833		0	1.77		1.77	456	50.8	6.55	2
IPI00479509.2	RcNSEP1 (Fragment)	0.2382	4	1	10	22	125100000	0.978	1		205200000	0.961	1		107800000	0.961	1		4	2	6	6	4	12	0.1536	0.1003	0.1787	0	6.75	2.86	9.61	319	35.4	10.01	3
IPI00010951.2	Epiplakin	0.2517	1	9	26	64	9634000000	0.977	5	13.6	7782000000	1.148	8	11.9	218700000	1.17	6	25.6	13	14	15	21	21	22	0.1933	0.1721	0.1625	30.03	33.05	32.75	95.83	5090	555.3	5.6	3
IPI00295857.7	Isoform 1 of Coatomer subunit alpha	0.1838	2	5	20	30	138400000	0.977	2	9.6	268900000	0.82	3	43.6	60660000	1.084	1		8	8	9	11	9	10	0.0711	0.0833	0.0866	0	2.23	2.11	4.34	1224	138.3	7.66	3
IPI00909143.1	Dihydrolipoyl dehydrogenase	0.2061	5	2	10	16	54830000	0.977	1		425700000	0.84	1		96820000	0.987	1		4	5	3	5	7	4	0.1106	0.154	0.0738	0	4.05	0	4.05	461	49.3	7.68	3
IPI00012268.3	26S proteasome non-ATPase regulatory subunit 2	0.1861	6	4	11	36	167800000	0.976	5	7	159300000	0.942	4	13	195500000	1.635	4	93.3	8	6	5	13	13	10	0.1421	0.1156	0.1134	11.63	8.19	8.38	28.2	908	100.1	5.2	3
IPI00022774.3	Transitional endoplasmic reticulum ATPase	0.2916	3	9	22	44	342600000	0.976	7	5.6	166000000	1.038	3	5.7	160700000	0.971	3	1.5	12	9	10	17	13	14	0.1973	0.1365	0.1712	19.41	21.29	18.69	59.39	806	89.3	5.26	3
IPI00100160.3	Isoform 1 of Cullin-associated NEDD8-dissociated protein 1	0.1374	3	6	12	29	125000000	0.975	3	8.2	1398000000	1.004	3	0.6	122600000	1.018	5	11.4	6	7	7	8	9	12	0.0659	0.0894	0.0772	2.22	10.21	2.14	14.57	1230	136.3	5.78	3
IPI00260715.5	Fus-like protein (Fragment)	0.1553	4	1	7	17	185400000	0.974	1		288600000	1.001	2	3.2	240500000	0.946	1		5	2	4	8	4	5	0.1402	0.0682	0.1174	0	0	0	0	528	53.3	9.42	3
IPI00876967.1	Isoform 2 of Centrosomal protein of 164 kDa	0.1196	3	1	14	25	1074000000	0.973	1		92950000	1.144	1		165900000	0.999	1		7	7	6	8	8	9	0.077	0.0426	0.0577	0	1.67	1.83	3.5	1455	163.4	5.36	3
IPI00013485.3	40S ribosomal protein S2	0.372	10	2	9	17	144800000	0.972	1		112200000	1.157	1		165600000	1.166	1		6	2	6	8	3	6	0.2833	0.0922	0.2594	0	0	2.29	2.29	293	31.3	10.24	3
IPI00290566.1	T-complex protein 1 subunit alpha	0.2428	7	4	9	17	142000000	0.972	1		444400000	1.061	2	6.6	301500000	1.132	1		5	6	4	5	6	6	0.1367	0.1637	0.1223	7.19	3.53	3.31	14.03	556	60.3	6.11	3
IPI00936738.1	Isoform 1 of Torsin-1A-interacting protein 1	0.2161	5	3	12	17	635100000	0.971	1		137500000	1.131	1		81050000				5	4	4	7	4	6	0.1046	0.1029	0.072	0	0	0	0	583	66.2	8.18	2
IPI00008552.6	Glutaredoxin-3	0.209	1	2	5	9	187500000	0.969	1		35600000	0.722	1		58150000	0.783	1		2	3	2	2	4	3	0.1015	0.1104	0.0746	0	3.9	4.02	7.92	335	37.4	5.39	3
IPI00744148.2	Isoform 1 of Core histone macro-H2A.1	0.1572	4	2	6	12	88590000	0.969	3	18.5	93940000	1.346	2	64.1	18160000	0.846	1		4	2	3	6	3	3	0.1003	0.0921	0.1111	0	0	0	0	369	39.2	9.83	3
IPI01012490.1	cDNA FLJ56675, highly similar to Activator of 90 kDa heat shock protein ATPase homolog 1	0.2951	5	2	8	10	88210000	0.969	1		35840000				140300000	1.716	1		4	2	4	4	2	4	0.1424	0.0764	0.1944	2.45	0	0	2.45	288	32.3	5.72	2
IPI01022906.1	Uncharacterized protein	0.2204	16	1	5	14	126500000	0.969	1		164700000				115400000	1.018	1		2	4	4	3	6	5	0.102	0.1776	0.1743	1.7	8.94	5.81	16.45	304	34.9	5.26	2
IPI00014238.2	Isoform Cytoplasmic of Lysyl-tRNA synthetase	0.1223	5	3	8	13	198100000	0.968	1		390000000	0.862	1		127100000				6	4	1	7	5	1	0.1072	0.0603	0.0235	0	1.73	1.62	3.35	597	68	6.35	2
IPI00879702.2	Uncharacterized protein	0.1154	7	2	3	5	41880000	0.967	2	15.8	46130000	0.982	1		38960000				3	1	1	3	1	1	0.1154	0.0745	0.0745	3.71	3.83	2.46	10	416	46.9	5.07	2
IPI00026781.3	Fatty acid synthase	0.3847	4	41	69	190	923000000	0.962	32	19.3	1210000000	0.963	27	13.9	647200000	0.956	22	9.3	49	39	27	78	64	48	0.2843	0.2417	0.182	64.23	93.83	76.89	234.95	2511	273.3	6.44	3
IPI00298961.3	Exportin-1	0.1064	10	7	9	22	103300000	0.962	5	24.7	68780000	0.962	4	6.4	238500000	0.829	3	18.3	7	5	5	9	6	7	0.0934	0.0766	0.0588	19.25	15.18	14.06	48.49	1071	123.3	6.06	3
IPI00871851.2	Isoform 2 of Septin-2	0.2727	16	4	8	16	94440000	0.961	3	28.1	117900000	1.129	2	4.1	48260000	0.96	3	35	6	3	4	8	4	4	0.1818	0.101	0.1869	4.15	3.54	9.27	16.96	396	45.4	6.89	3
IPI00718888.1	Isoform 2 of Ribose-phosphate pyrophosphokinase 2	0.2399	11	4	9	21	231100000	0.96	5	1.4	71800000	1.136	3	32	106200000	1.041	4	30.7	7	3	4	9	5	7	0.1963	0.1371	0.1558	10.28	11.87	11.02	33.17	321	35	6.46	3
IPI00172656.6	FAS-associated factor 2	0.0787	2	1	2	4	32560000	0.959	1		28560000	1.133	1		58900000	1.047	1		1	1	2	1	1	2	0.0404	0.0404	0.0787	2.39	0	0	2.39	445	52.6	5.62	3
IPI00217920.7	Isoform 1 of Aldehyde dehydrogenase family 16 member A1	0.1658	5	2	10	20	151100000	0.955	1		384000000	1.279	2	11.2	320700000	1.446	1		3	6	5	4	9	7	0.0411	0.1259	0.0898	1.79	3.96	1.87	7.62	802	85.1	6.79	3
IPI00914566.2	Farnesyl pyrophosphate synthase	0.1599	4	3	5	17	128100000	0.954	2	21.1	66000000	1.023	2	19.6	2793000000	1.073	4	17.3	3	3	4	6	5	6	0.1026	0.0931	0.1289	0	0	0	0	419	48.2	6.15	3
IPI00337823.1	Isoform 2 of Melanoma-associated antigen D2	0.2194	5	2	10	14	122300000	0.952	2	0.2	55400000	1.505	1		29050000	0.778	1		5	4	3	5	5	4	0.131	0.1037	0.0901	1.9	0	0	1.9	588	63.1	9.35	3
IPI01014067.1	Uncharacterized protein	0.2745	4	1	18	39	1354000000	0.95	1		762700000	0.987	1		966400000				9	9	9	11	11	17	0.1549	0.1304	0.184	0	0	0	0	652	72.5	8.63	2
IPI00917777.1	116 kDa U5 small nuclear ribonucleoprotein component isoform b	0.1483	4	5	11	26	82600000	0.948	3	17.4	222200000	1.076	3	16	267000000	1.168	3	10.3	7	6	6	7	10	9	0.1035	0.1014	0.0875	2.64	12	10.54	25.18	937	105.3	5.22	3
IPI00026516.1	Succinyl-CoA:3-ketoacid-coenzyme A transferase 1, mitochondrial	0.2308	5	6	9	28	157800000	0.946	3	14.4	107800000	0.886	4	22	50270000	1.083	4	25	7	7	4	11	11	6	0.1712	0.2058	0.15	15.97	18.95	11.08	46	520	56.1	7.46	3
IPI00301058.5	Vasodilator-stimulated phosphoprotein	0.3211	1	1	11	14	225600000	0.945	1		219200000	0.976	1		161100000	0.985	1		4	5	4	4	6	4	0.1658	0.1605	0.1368	0	2.63	2.22	4.85	380	39.8	8.94	3
IPI00418202.2	Uncharacterized protein	0.2132	4	2	3	18	52880000	0.944	2	8.3	8300000	1.333	2	22.4	7817000	1.653	2	50	3	2	2	6	7	5	0.2132	0.1287	0.1287	5.81	11.49	5.24	22.54	272	30.6	6.65	3
IPI00219994.2	Isoform 3 of Exportin-2	0.1884	6	6	13	33	146200000	0.943	4	23.3	99460000	1.03	6	5	209600000	1.033	3	15.7	5	8	7	9	12	12	0.0825	0.1333	0.1153	14.97	17.28	13.39	45.64	945	107.7	5.82	3
IPI00873406.1	Isoform 2 of Protein KIAA1967	0.1484	3	1	14	25	480300000	0.943	1		131600000	1.129	1		176000000	1.3	1		7	6	8	8	7	10	0.078	0.0823	0.0975	7.62	4.41	2.26	14.29	923	103.1	5.43	3
IPI00218993.1	Isoform Beta of Heat shock protein 105 kDa	0.1143	7	2	8	11	28230000	0.942	2	65.2	68720000	0.699	1		354800000				2	3	4	2	5	4	0.0369	0.0467	0.0602	2.66	1.84	0	4.5	814	92.1	5.55	2
IPI00929107.1	Seipin isoform 1	0.1635	2	3	12	36	1042000000	0.939	1		81380000	0.775	2	36.1	666600000	1.081	1		9	6	7	18	7	11	0.1287	0.0979	0.1099	11.63	11.06	6	28.69	746	84.6	4.93	3
IPI00946636.2	cDNA FLJ51804, highly similar to Vacuolar ATP synthase catalytic subunit A, ubiquitous isoform	0.1815	4	3	10	37	106000000	0.936	4	40.5	37790000	1.051	2	2.6	92320000	1.274	2	41.7	7	4	6	12	12	13	0.1524	0.0805	0.149	9.6	9.2	3.46	22.26	584	64.7	5.66	3
IPI00157790.7	proteasome-associated protein ECM29 homolog	0.1329	2	5	26	45	763100000	0.935	2	18.2	234200000	0.68	1		285500000	1.974	3	24.4	12	11	14	15	12	18	0.0649	0.0649	0.0793	2.26	1.83	1.74	5.83	2017	223.6	8.75	3
IPI00291510.3	Inosine-5'-monophosphate dehydrogenase 2	0.2374	3	2	11	19	46460000	0.932	1		264400000	0.963	1		63480000	1.034	2	8.9	3	6	4	5	9	5	0.0681	0.1479	0.1109	7.08	7.05	7.16	21.29	514	55.8	6.9	3
IPI01011191.1	cDNA FLJ59681, highly similar to Plastin-3	0.2853	9	9	14	39	185300000	0.932	6	67.5	87360000	1.014	6	43.9	276000000	0.953	4	36.3	11	9	8	19	11	9	0.2156	0.1929	0.1896	2.05	8.39	4.58	15.02	617	69.3	5.83	3
IPI00291006.2	Malate dehydrogenase, mitochondrial	0.4201	3	8	10	38	388900000	0.931	6	18.6	277100000	1.151	6	16.3	267900000	1.055	5	10.2	7	8	7	14	12	12	0.3254	0.358	0.3107	16.39	12.73	15.41	44.53	338	35.5	8.68	3
IPI00003968.1	NADH dehydrogenase [ubiquinone] 1 alpha subcomplex subunit 9, mitochondrial	0.1645	2	2	5	11	20320000	0.93	1		69880000	0.555	1		18210000	0.896	1		1	4	2	2	6	3	0.0345	0.1326	0.0663	3.88	2.18	1.65	7.71	377	42.5	9.8	3
IPI00651653.2	probable ATP-dependent RNA helicase DDX17 isoform 3	0.3406	6	6	21	42	373400000	0.93	2	0.3	268400000	0.956	3	10	98000000	0.937	1		14	8	9	19	11	12	0.2367	0.1368	0.1573	1.75	6.23	0	7.98	731	80.4	8.37	3
IPI00646721.1	Ubiquitin carboxyl-terminal hydrolase	0.1538	3	1	12	19	1199000000	0.929	1		388900000	0.968	1		2189000000				5	8	3	7	9	3	0.0764	0.1234	0.0378	2.18	1.76	0	3.94	1086	126.2	5.71	2
IPI00964123.1	Uncharacterized protein	0.2179	4	4	8	13	88010000	0.927	2	28.3	70250000	1.41	2	0.3	44270000	1.383	1		4	3	3	5	4	4	0.1041	0.0969	0.0896	4.49	6.97	6.96	18.42	413	45.6	6.68	3
IPI00883655.2	dihydropyrimidinase-related protein 2 isoform 1	0.195	8	3	9	11	141800000	0.926	1		41520000				30740000	1.097	2	29.5	6	1	4	6	1	4	0.1182	0.0133	0.096	3.72	0	0	3.72	677	73.5	6.35	2
IPI01010050.1	cDNA, FLJ78818, highly similar to Voltage-dependent anion-selective channel protein 2	0.2431	8	3	4	7	266000000	0.924	3	1.5	139200000	0.963	1		76060000	1.269	1		3	1	2	4	1	2	0.1765	0.0784	0.1451	0	0	0	0	255	27.5	5.47	3
IPI00031517.1	DNA replication licensing factor MCM6	0.2546	2	7	19	40	572000000	0.923	3	6.7	395600000	0.952	3	47.5	433000000	1.561	3	31.7	10	10	9	14	11	15	0.134	0.1462	0.1352	0	5.29	8.53	13.82	821	92.8	5.41	3
IPI00013808.1	Alpha-actinin-4	0.3765	15	9	28	67	559100000	0.921	5	14.3	447700000	1.099	4	27.1	233600000	1.116	5	12.6	18	13	15	28	20	19	0.2316	0.1998	0.2404	8.6	17.84	14.42	40.86	911	104.8	5.44	3
IPI00181728.1	Ribosome biogenesis protein BRX1 homolog	0.238	1	2	7	14	238900000	0.92	1		1041000000	0.915	1		43910000				4	4	3	5	6	3	0.1275	0.1586	0.102	0	0	0	0	353	41.4	9.92	2
IPI00420108.6	Dihydrolipoyllysine-residue succinyltransferase component of 2-oxoglutarate dehydrogenase complex, mitochondrial	0.1678	6	1	9	13	116000000	0.919	1		76620000				47250000	0.976	1		9	1	2	10	1	2	0.1678	0.0309	0.053	1.77	0	0	1.77	453	48.7	8.95	2
IPI00908582.1	cDNA FLJ50164, highly similar to Protein flightless-1 homolog	0.131	3	1	13	20	273900000	0.919	1		238800000				135000000	0.773	1		7	5	6	7	5	8	0.0651	0.044	0.0735	2.73	0	3.83	6.56	1183	135.1	6.13	2
IPI00002894.2	DNA polymerase delta catalytic subunit	0.1319	3	1	14	25	472800000	0.918	1		197200000				16990000	1.169	1		9	5	5	11	8	6	0.0822	0.0587	0.0434	0	1.8	0	1.8	1107	123.6	7.03	2
IPI00031461.2	cDNA FLJ60299, highly similar to Rab GDP dissociation inhibitor beta	0.2494	8	5	9	37	122000000	0.912	4	41.8	114300000	0.972	6	19.6	98980000	1.047	5	18.7	5	7	5	14	13	10	0.1782	0.1982	0.1915	34.96	28.01	28.5	91.47	449	51.1	8.18	3
IPI00021812.2	Neuroblast differentiation-associated protein AHNAK	0.1674	3	2	40	66	471800000	0.911	3	3.9	1714000000	0.761	1		489200000	0.875	1		16	10	20	26	17	23	0.0958	0.0467	0.074	5.3	0	0	5.3	5890	628.7	6.15	3
IPI00290416.3	Isoform 1 of Obg-like ATPase 1	0.1338	5	2	5	8	134700000	0.91	2	29.4	133900000	1.085	1		100400000	1.11	1		3	2	2	3	2	3	0.0934	0.0631	0.053	0	1.68	2.92	4.6	396	44.7	7.81	3
IPI00007289.7	Alkaline phosphatase, placental type precursor	0.44	3	11	15	51	578100000	0.909	9	16.8	543000000	1.027	6	12.2	280900000	0.987	7	6.6	12	8	10	21	15	15	0.3636	0.2455	0.3073	20.12	13.65	14.64	48.41	550	59.5	6.29	3
IPI00019502.3	Isoform 1 of Myosin-9	0.2464	22	11	45	91	3353000000	0.908	6	18	3745000000	1.074	5	20.9	442500000	0.788	3	2.5	29	22	14	39	30	22	0.1689	0.1168	0.0883	14.02	15.87	15.92	45.81	1960	226.4	5.6	3
IPI00299402.1	Pyruvate carboxylase, mitochondrial	0.1002	2	2	11	23	813000000	0.906	1		748900000	0.985	1		389600000	0.928	1		6	6	5	9	8	6	0.0577	0.062	0.0526	1.87	4.15	1.91	7.93	1178	129.6	6.84	3
IPI00299024.9	Isoform 1 of Brain acid soluble protein 1	0.4141	2	2	5	11	167400000	0.905	1		211500000	0.913	2	1.6	209800000	0.914	1		4	2	1	5	4	2	0.3348	0.1718	0.0925	5.88	0	0	5.88	227	22.7	4.63	3
IPI00005198.2	Interleukin enhancer-binding factor 2	0.2615	3	3	7	14	94570000	0.898	2	30.5	96970000	1.62	2	95.3	45130000	1.084	1		4	4	2	6	5	3	0.1308	0.1821	0.0795	4.32	2.79	7.08	14.19	390	43	5.26	3
IPI00336016.3	Probable cysteinyl-tRNA synthetase, mitochondrial	0.1277	2	1	6	14	129300000	0.897	1		12200000	1.135	1		38520000	1.009	2	7.8	5	2	3	6	4	4	0.1277	0.0585	0.0585	0	1.8	0	1.8	564	62.2	8.34	3
IPI00306960.3	Asparaginyl-tRNA synthetase, cytoplasmic	0.1734	2	1	9	22	299300000	0.896	1		112300000	0.972	1		147600000	0.855	1		5	5	4	7	8	7	0.0985	0.0894	0.0712	0	0	0	0	548	62.9	6.25	3
IPI00185374.4	26S proteasome non-ATPase regulatory subunit 12	0.1776	2	2	7	13	103100000	0.893	1		63080000				133000000	1.019	1		5	3	2	6	4	3	0.1557	0.0658	0.0724	1.77	2.31	3.46	7.54	456	52.9	7.65	2
IPI00007675.6	Cytoplasmic dynein 1 light intermediate chain 1	0.1396	2	1	5	7	17630000	0.89	1		25010000	0.689	1		171300000	0.925	1		2	2	3	2	2	3	0.0784	0.0688	0.065	3.68	3.74	3.51	10.93	523	56.5	6.42	3
IPI00412742.1	Isoform 2 of Calcium-binding mitochondrial carrier protein SCaMC-1	0.2096	2	2	7	13	50030000	0.889	2	22.7	124600000	0.988	1		43520000	0.994	1		4	4	1	5	6	2	0.1157	0.1485	0.0349	6.14	6.96	5.98	19.08	458	51.3	5.88	3
IPI00549189.4	Thimet oligopeptidase	0.0972	1	1	7	19	255000000	0.887	1		129000000	0.934	1		155000000	0.785	1		5	4	2	8	8	3	0.0798	0.0682	0.0363	5.8	7.2	6.63	19.63	689	78.8	6.05	3
IPI01020686.1	Uncharacterized protein	0.5701	24	3	19	112	1505000000	0.886	6	15.2	1225000000	0.963	7	18.7	777400000	0.973	5	12.5	16	15	13	36	38	38	0.5057	0.4667	0.4345	52.92	62.61	64.81	180.34	435	48.5	5.2	3
IPI00022143.3	Isoform 1 of Extended synaptotagmin-1	0.1005	4	2	12	17	172200000	0.885	2	88.7	3227000000				154600000	0.493	1		5	5	5	6	5	6	0.0498	0.038	0.0507	4.16	1.83	4.88	10.87	1104	122.8	5.83	2
IPI00908902.1	cDNA FLJ57028, highly similar to Long-chain-fatty-acid--CoA ligase 4	0.1569	5	3	8	13	2721000000	0.884	3	1.3	1688000000	0.799	1		38300000	0.92	1		6	3	1	7	4	2	0.1015	0.0831	0.0277	6.3	3.89	4.56	14.75	650	72.1	8.22	3
IPI00009328.4	Eukaryotic initiation factor 4A-III	0.2822	1	2	9	20	288000000	0.883	2	21.8	142900000	0.953	1		115900000	0.719	2	57.7	7	3	3	10	5	5	0.2141	0.1363	0.1314	10.37	8.08	5.62	24.07	411	46.8	6.73	3
IPI00306301.2	pyruvate dehydrogenase E1 component subunit alpha, somatic form, mitochondrial isoform 2 precursor	0.285	5	2	11	20	295800000	0.883	1		77030000	0.87	2	0.5	121700000	0.926	2	3.7	7	4	4	8	7	5	0.215	0.1285	0.0958	0	0	0	0	428	47.5	8.54	3
IPI01009615.1	Uncharacterized protein	0.2241	5	4	10	23	93680000	0.882	2	7.4	72280000	0.931	3	14.4	73070000	1.057	3	6.7	7	5	5	9	7	7	0.1677	0.1174	0.125	8.14	9.18	5.37	22.69	656	73.9	7.83	3
IPI01014975.1	Uncharacterized protein	0.1733	2	6	34	54	630200000	0.882	2	28.5	381300000	0.966	5	26.4	129000000	0.904	3	20.7	15	16	13	17	21	16	0.0819	0.086	0.0688	3.8	13.5	8.62	25.92	2429	257.9	6.49	3
IPI00007928.4	Pre-mRNA-processing-splicing factor 8	0.1829	2	9	40	65	927500000	0.88	6	37.2	323800000	1.174	4	9.6	398100000	1.127	3	1.2	24	15	13	27	19	19	0.1062	0.0822	0.0672	6.32	19.18	6.08	31.58	2335	273.4	8.84	3
IPI00385834.3	Isoform 2 of KH domain-containing, RNA-binding, signal transduction-associated protein 1	0.1196	10	2	5	12	134500000	0.88	3	55.5	375800000				193800000	0.942	1		4	1	2	8	1	3	0.1196	0.0263	0.0742	2.52	0	6.2	8.72	418	45.8	7.58	2
IPI00888085.1	Isoform 4 of Serrate RNA effector molecule homolog	0.1883	8	2	18	26	275100000	0.876	2	30.6	40780000	1.152	1		91140000	0.922	1		12	3	7	13	3	10	0.1424	0.0344	0.0712	0	0	2.65	2.65	871	100.1	6.01	3
IPI00010810.1	Electron transfer flavoprotein subunit alpha, mitochondrial	0.2492	2	4	6	13	48520000	0.873	3	34.3	83150000	1.113	2	0.2	145500000	1.075	1		4	2	3	5	3	5	0.1982	0.0871	0.1441	5.08	5.42	7.18	17.68	333	35.1	8.38	3
IPI00843765.1	Isoform 3 of Spectrin alpha chain, brain	0.1839	4	3	40	86	878800000	0.872	4	58.9	507300000	1.918	1		201100000	1.057	1		23	11	16	36	25	25	0.1097	0.0555	0.0746	9.6	10.26	13.78	33.64	2452	282.1	5.34	3
IPI00909657.1	cDNA FLJ50378, highly similar to Phenylalanyl-tRNA synthetase alpha chain	0.1845	2	2	7	15	1061000000	0.871	1		78470000	1.268	2	107.2	101500000	0.663	1		4	3	3	9	3	3	0.1237	0.0734	0.0692	2.36	0	0	2.36	477	54.1	7.8	3
IPI00018206.4	Aspartate aminotransferase, mitochondrial	0.1977	3	4	7	16	5497000000	0.868	2	27	58460000	0.881	2	32.3	3319000000	1.015	2	33.6	5	2	5	7	3	6	0.1372	0.0628	0.1488	0	1.64	2.38	4.02	430	47.5	9.01	3
IPI00982482.2	Uncharacterized protein	0.1481	4	4	17	21	147500000	0.867	1		17690000	1.043	1		359100000	4.234	1		9	3	8	9	4	8	0.0773	0.0322	0.0709	2.25	2.32	0	4.57	1242	142.2	6.09	3
IPI00018398.4	26S protease regulatory subunit 6A	0.1321	7	1	5	8	35490000	0.865	1		37310000	0.839	1		24160000	1.075	1		2	2	3	2	3	3	0.0638	0.0615	0.0752	1.8	3.95	2.2	7.95	439	49.2	5.24	3
IPI00983652.2	cDNA FLJ61021, highly similar to Far upstream element-binding protein 1	0.1733	5	4	9	17	361100000	0.864	1		422500000	0.987	3	5.7	353300000	1.015	2	12.2	5	6	3	6	6	5	0.089	0.1272	0.0652	5.93	0	0	5.93	629	66.2	7.56	3
IPI00009904.1	Protein disulfide-isomerase A4	0.1829	1	4	10	18	133200000	0.863	4	100.5	76000000	1.094	4	36.8	66510000	1.731	2	44.9	7	5	4	9	5	4	0.1395	0.1132	0.0775	8.56	5.59	0	14.15	645	72.9	5.07	3
IPI01015554.1	cDNA FLJ36221 fis, clone THYMU2000950, highly similar to Eukaryotic translation initiation factor 3 subunit 6-interacting protein	0.1953	5	3	8	19	49710000	0.857	1		129300000	0.913	3	3.9	469600000	1.08	3	10.8	1	6	5	2	8	9	0.0258	0.1652	0.1073	0	0	4.99	4.99	466	55.1	8.95	3
IPI00005614.6	Isoform Long of Spectrin beta chain, brain 1	0.1332	4	4	28	48	567600000	0.856	2	2.1	13390000000	0.776	3	16.3	215100000	1.137	1		14	13	11	19	17	12	0.0753	0.0647	0.058	3.26	4.78	4.54	12.58	2364	274.4	5.57	3
IPI00021700.3	Proliferating cell nuclear antigen	0.2989	1	3	7	16	226100000	0.852	3	1.3	132900000	0.91	3	7	41490000	0.862	2	27.8	6	4	3	7	6	3	0.2989	0.2337	0.1839	6.98	11.08	6.43	24.49	261	28.8	4.69	3
IPI00900297.2	Isoform 2 of Eukaryotic translation initiation factor 2 subunit 3-like protein	0.1245	3	1	4	6	179000000	0.852	1		109500000				41560000	1.101	1		4	1	1	4	1	1	0.1245	0.0172	0.0536	2.58	0	3.38	5.96	466	50.5	7.85	2
IPI00170935.1	Leucine-rich repeat-containing protein 47	0.2093	1	2	9	18	5105000000	0.848	2	3.2	86480000	0.93	1		197600000				6	4	1	12	4	2	0.1304	0.1098	0.0206	2.63	3.45	0	6.08	583	63.4	8.28	2
IPI00000494.6	60S ribosomal protein L5	0.4444	2	4	13	36	192700000	0.84	2	24	230600000	0.912	2	3.8	103200000	1.04	2	0.2	6	8	4	14	13	9	0.2323	0.3131	0.1785	2.02	3.69	3.48	9.19	297	34.3	9.72	3
IPI00219841.6	DNA ligase 1	0.2122	4	1	17	27	147500000	0.839	1		395500000	0.821	1		439600000	0.811	1		7	9	6	9	11	7	0.1001	0.1088	0.0849	6.6	7.53	6.96	21.09	919	101.7	5.62	3
IPI00947363.2	cDNA FLJ53366, highly similar to Probable ATP-dependent RNA helicase DDX5	0.3101	4	3	19	37	339100000	0.837	2	22.8	428100000	0.672	2	24.7	196800000	0.875	1		12	8	8	15	11	11	0.2106	0.1725	0.1343	0	3.89	0	3.89	603	67.7	8.87	3
IPI00328298.6	Isoform 2 of Structural maintenance of chromosomes protein 4	0.1073	4	1	13	17	28830000	0.837	1		32010000	1.068	1		889500000				6	6	3	8	6	3	0.0463	0.0602	0.0268	6.5	3.32	0	9.82	1230	140.2	6.8	2
IPI00156374.6	Isoform 1 of Importin-4	0.0712	3	4	7	15	23430000	0.836	1		362700000	1.13	2	3.5	22750000	1.132	3	4.7	3	5	4	4	7	4	0.0315	0.0463	0.0444	0	1.82	0	1.82	1081	118.6	4.96	3
IPI00909232.1	cDNA FLJ53542, highly similar to Heterogeneous nuclear ribonucleoproteins C	0.3924	21	4	11	24	808700000	0.836	3	21.3	362200000	0.807	3	38.2	251900000	0.873	2	22.8	9	6	2	14	8	2	0.3194	0.2222	0.0938	0	1.62	0	1.62	288	32	8.72	3
IPI00180128.4	Isoform 2 of Basic leucine zipper and W2 domain-containing protein 1	0.1926	9	3	5	13	194400000	0.834	2	52.1	51970000	0.867	2	19.2	45730000	0.543	2	60.4	5	1	1	7	3	3	0.1926	0.0737	0.0737	3.08	10.87	7.57	21.52	353	40.5	6.46	3
IPI00293655.3	ATP-dependent RNA helicase DDX1	0.177	2	2	10	18	153200000	0.829	2	35.1	129400000	1.145	1		34930000	1.032	1		6	4	4	7	7	4	0.1162	0.0662	0.0838	3.45	0	0	3.45	740	82.4	7.23	3
IPI00008240.2	Methionyl-tRNA synthetase, cytoplasmic	0.1578	11	4	11	11	834000000	0.814	2	66.4	98940000				13780000	0.839	2	3.3	5	4	2	5	4	2	0.06	0.0667	0.0311	0	0	2.95	2.95	900	101.1	6.16	2
IPI00794461.1	Histone H2B type 1-N	0.1867	18	1	3	9	31230000	0.814	1		369700				22310000	0.526	1		3	1	2	4	2	3	0.1867	0.0422	0.1325	2.54	0	2.69	5.23	166	18.8	10.54	2
IPI01021659.1	23 kDa protein	0.4444	16	1	7	12	57430000	0.754	1		156500000	0.73	1		29900000	0.55	1		3	4	3	3	5	4	0.2273	0.2424	0.2323	1.61	4.4	5.13	11.14	198	23.4	4.81	3
IPI00640922.1	Isoform 2 of Large proline-rich protein BAG6	0.0861	12	1	6	13	4632000000	0.731	1		154200000				102300000	0.632	1		4	2	3	8	2	3	0.056	0.0302	0.0391	0	0	0	0	1126	118.6	5.6	2
IPI01013542.1	Uncharacterized protein	0.212	8	3	7	9	160600000	0.681	1		27040000	0.897	2	16.3	29270000	1.018	2	22.5	3	3	3	3	3	3	0.084	0.082	0.106	2.09	1.77	1.8	5.66	500	53.9	6.33	3
IPI01012733.1	Uncharacterized protein	0.1218	4	1	8	9	809600000	0.68	1		150500				50340000	0.599	1		5	1	3	5	1	3	0.0816	0.0115	0.046	4.36	0	2.5	6.86	870	97.6	5.95	2
IPI00011913.1	Heterogeneous nuclear ribonucleoprotein A0	0.1869	1	3	5	12	485300000	0.678	1		74510000	1.889	1		0				4	2		10	2		0.1213	0.1082		5.83	2.1		7.93	305	30.8	9.29	2
IPI00305068.5	Pre-mRNA-processing factor 6	0.1892	2	2	16	29	384900000	0.675	2	78.1	245000000	1.539	1		514400000				9	4	8	10	7	12	0.1286	0.0563	0.1063	0	0	0	0	941	106.9	8.25	2
IPI00219301.7	Myristoylated alanine-rich C-kinase substrate	0.1627	1	1	4	7	53070000	0.643	1		67060000	0.93	1		67310000	0.738	1		3	1	2	3	2	2	0.1416	0.0512	0.0723	2.09	1.67	0	3.76	332	31.5	4.45	3
IPI00847896.1	Similar to Glutamate-rich WD repeat-containing protein 1	0.036	2	1	1	3	28430000	0.609	1		5387000				23550000	0.682	1		1	1	1	1	1	1	0.036	0.036	0.036	2.89	3.13	3.13	9.15	445	49.2	4.89	2
IPI00020599.1	Calreticulin	0.1055	1	2	4	7	203500000	0.593	3	31.4	57750000				82660000	1.297	1		2	2	2	3	2	2	0.0647	0.0408	0.0552	0	0	0	0	417	48.1	4.44	2
IPI00929553.1	Isoform 2 of ATPase family AAA domain-containing protein 1	0.2369	3	1	8	11	29190000	0.528	1		106500000	1.333	1		20690000	0.833	1		3	4	3	3	4	4	0.1045	0.1463	0.1254	1.81	1.9	2.47	6.18	287	32.4	9.36	3
IPI00011416.2	Delta(3,5)-Delta(2,4)-dienoyl-CoA isomerase, mitochondrial	0.25	2	3	5	5	16040000	0.524	2	70.2	13270000	0.613	1		9637000				3	1	1	3	1	1	0.1463	0.0671	0.0366	0	2.53	0	2.53	328	35.8	8	2
IPI00909703.2	Uncharacterized protein	0.2184	4	3	9	14	37680000	0.509	1		152700000	1.3	1		83010000				2	7	2	2	7	5	0.0437	0.1748	0.0534	0	4.08	0	4.08	412	45.7	8.46	2
IPI00006379.1	Nucleolar protein 58	0.2079	1	1	9	11	37560000	0.462	1		27460000				20280000	1.168	1		4	4	3	4	4	3	0.1115	0.0775	0.0775	5.31	0	3.44	8.75	529	59.5	8.92	2
IPI00008485.1	Cytoplasmic aconitate hydratase	0.1282	3	4	10	15	367100000	0.263	2	1051.2	77340000	1.141	1		220900000	0.914	1		4	5	4	4	5	6	0.0529	0.0619	0.0517	3.2	1.97	1.99	7.16	889	98.3	6.68	3
IPI00792916.2	glucosidase 2 subunit beta isoform 2	0.1067	2	1	5	11	527100000	0.043	1		1061000000	0.039	1		1588000000	0.034	1		3	3	3	5	3	3	0.0629	0.0667	0.0552	2.22	0	0	2.22	525	59.1	4.42	3
IPI00000690.1	Isoform 1 of Apoptosis-inducing factor 1, mitochondrial	0.2447	6	3	13	18	132800000				153400000	1.077	2	20.5	53760000	0.914	1		6	5	3	7	7	4	0.1126	0.0881	0.0897	0	2.3	1.63	3.93	613	66.9	8.95	2
IPI00007084.3	Calcium-binding mitochondrial carrier protein Aralar2	0.0933	3	1	5	10	93140000				34480000	1.034	1		29210000	1.78	1		3	2	2	4	3	3	0.0444	0.0489	0.0489	0	6.04	6.93	12.97	675	74.1	8.62	2
IPI00012535.1	DnaJ homolog subfamily A member 1	0.1612	2	1	5	13	18700000				40080000	1.068	2	4.7	45780000	1.17	2	3.6	2	3	2	2	6	5	0.073	0.0882	0.068	0	0	4.81	4.81	397	44.8	7.08	2
IPI00012578.1	Importin subunit alpha-4	0.1132	2	1	4	11	23950000				61610000	1.02	1		403500000	0.999	1		1	3	3	1	4	6	0.0326	0.0864	0.0768	0	5.18	5.79	10.97	521	57.9	4.96	2
IPI00015602.1	Mitochondrial import receptor subunit TOM70	0.1135	2	1	5	7	29350000				23660000	1.956	2	2.8	25420000	0.981	1		2	2	2	2	3	2	0.0411	0.0691	0.0444	0	6.67	3.98	10.65	608	67.4	7.12	2
IPI00019463.3	Interferon-induced, double-stranded RNA-activated protein kinase	0.1506	3	1	7	11	58090000				230100000	1.094	1		295100000	1.014	1		1	4	5	1	4	6	0.0145	0.0817	0.1216	0	0	1.69	1.69	551	62.1	8.4	2
IPI00028083.1	Translation initiation factor eIF-2B subunit beta	0.151	1	1	4	5	263700000				18440000	1.032	1		52590000	0.536	1		2	1	2	2	1	2	0.0655	0.0513	0.0855	1.79	1.91	0	3.7	351	39	6.16	2
IPI00028277.8	Isoform 1 of Alpha-ketoglutarate-dependent dioxygenase FTO	0.0832	3	1	6	12	210800000				24230000	0.9	1		213800000	1.085	1		2	4	4	3	4	5	0.0297	0.0634	0.0713	0	1.87	0	1.87	505	58.2	5.22	2
IPI00033030.2	Proteasomal ubiquitin receptor ADRM1	0.059	2	1	2	3	231100000				123600000	1.028	1		135200000	0.99	1		1	1	1	1	1	1	0.0197	0.0393	0.0393	0	0	0	0	407	42.1	5.07	2
IPI00102752.2	Isoform 1 of Putative RNA-binding protein 15	0.2446	3	1	18	26	65220000				214600000	0.704	1		404100000	0.641	1		6	8	7	6	10	10	0.0931	0.1146	0.1105	0	0	1.81	1.81	977	107.1	10.08	2
IPI00154590.6	MKI67 FHA domain-interacting nucleolar phosphoprotein	0.1126	2	1	3	7	52390000				22410000	0.825	1		38400000	1.404	1		1	1	3	1	1	5	0.0307	0.0444	0.1126	0	0	0	0	293	34.2	9.88	2
IPI00183400.8	Isoform 1 of Casein kinase I isoform alpha	0.3205	3	1	10	19	161000000				132100000	1.338	2	5	39860000	1.179	1		4	5	4	5	8	6	0.1484	0.184	0.1662	0	2.28	0	2.28	337	38.9	9.57	2
IPI00215888.4	Signal recognition particle 72 kDa protein	0.1043	2	1	5	10	54370000				23670000	1.06	1		77700000	1.316	1		1	2	3	3	3	4	0.0194	0.0477	0.0686	0	5.03	2.05	7.08	671	74.6	9.26	2
IPI00217952.6	Isoform 1 of Glucosamine--fructose-6-phosphate aminotransferase [isomerizing] 1	0.1602	4	1	9	17	1221000000				35240000	0.358	1		67190000	0.102	1		4	6	3	5	7	5	0.083	0.0987	0.0429	2.49	1.69	3.42	7.6	699	78.8	7.11	2
IPI00219265.3	Isoform Short of FAS-associated factor 1	0.0964	5	1	5	9	628500000				18650000	1.029	1		141100000	1.024	1		2	1	4	2	2	5	0.0462	0.0261	0.0763	0	1.99	3.69	5.68	498	56.9	5.06	2
IPI00220684.1	Isoform 3 of Heterogeneous nuclear ribonucleoprotein D0	0.3105	10	1	7	13	194300000				134500000	1.015	1		216600000	0.999	1		3	4	4	3	4	6	0.1307	0.1895	0.2026	0	0	0	0	306	32.8	8.16	2
IPI00291578.7	Isoform 1 of Phosphoribosyl pyrophosphate synthase-associated protein 1	0.0927	7	2	3	3	0				5379000	0.631	1		15520000	1.431	1		1	1	1	1	1	1	0.0197	0.0393	0.0337	0	1.96	0	1.96	356	39.4	7.2	2
IPI00306516.1	Mitochondrial import inner membrane translocase subunit TIM44	0.1836	1	1	8	10	619700000				50460000	0.865	1		1124000000	0.893	1		4	4	2	4	4	2	0.0819	0.104	0.0509	0	0	0	0	452	51.3	8.32	2
IPI00374272.3	UPF0600 protein C5orf51	0.2211	1	1	5	6	0				6063000	1.913	1		40970000	1.111	1		1	1	4	1	1	4	0.0374	0.0476	0.1837	0	0	0	0	294	33.6	5.26	2
IPI00377161.8	Isoform 2 of 3-hydroxyisobutyryl-CoA hydrolase, mitochondrial	0.2751	4	2	7	8	280300				98110000	0.992	1		41950000	2.27	1		1	4	3	1	4	3	0.074	0.1302	0.1036	0	0	0	0	338	38	8.54	2
IPI00396321.1	Leucine-rich repeat-containing protein 59	0.3713	1	1	14	21	1654000000				492100000	0.762	1		231400000	0.786	1		4	8	7	4	10	7	0.1238	0.2573	0.2508	0	2.06	2.49	4.55	307	34.9	9.57	2
IPI00514126.2	Isoform 1 of Glycogen debranching enzyme	0.077	3	3	11	13	329500000				253500000	1.054	1		154700000	0.828	1		3	7	3	3	7	3	0.0183	0.0463	0.0248	0	3.88	2.13	6.01	1532	174.7	6.76	2
IPI00554711.3	Junction plakoglobin	0.1638	1	2	9	18	1373000000				151300000	0.78	2	9	198400000	0.744	2	1.5	6	4	3	8	5	5	0.1369	0.0832	0.0537	0	2.21	2.46	4.67	745	81.7	6.14	2
IPI00642416.1	60 kDa SS-A/Ro ribonucleoprotein isoform 4	0.1544	5	2	7	12	79750000				22780000	1.076	1		22570000	1.075	1		2	3	3	3	4	5	0.056	0.0734	0.0734	0	1.94	0	1.94	518	58.4	8.37	2
IPI00645329.1	Isoform 3 of Histone-binding protein RBBP4	0.0829	6	1	3	9	37000000				73810000	0.861	1		126100000	1.038	1		1	2	2	1	5	3	0.0171	0.0659	0.0659	0	0	0	0	410	46.1	5.07	2
IPI00746351.2	Isoform 1 of Exosome complex exonuclease RRP44	0.1524	2	1	13	38	330200000				186000000	0.94	1		608400000	1.375	1		7	8	4	13	13	12	0.0908	0.1013	0.0365	0	5.24	2.53	7.77	958	108.9	7.14	2
IPI00873472.1	Isoform 1 of Protein transport protein Sec24A	0.1043	1	2	9	10	1350000000				14020000	0.991	1		103300000	1.096	1		3	2	5	3	2	5	0.0503	0.0238	0.0403	0	2.73	0	2.73	1093	119.7	7.66	2
IPI00893023.1	Uncharacterized protein	0.1875	28	1	5	6	131900000				87620000	0.918	1		42420000	0.998	1		2	3	1	2	3	1	0.1141	0.0924	0.0435	0	0	0	0	368	41.4	7.06	2
IPI00893035.1	Uncharacterized protein	0.0856	3	2	20	38	480100000				98500000	1.045	1		107800000	0.785	1		8	6	10	10	10	18	0.0333	0.0305	0.0375	1.74	1.94	3.79	7.47	2162	235.9	6.55	2
IPI00908762.3	cDNA FLJ53509, highly similar to Galectin-3-binding protein	0.1283	4	1	3	4	0				18770000	0.79	1		37790000	0.71	1		1	2	1	1	2	1	0.0702	0.0581	0.0315	0	0	0	0	413	46.4	5.26	2
IPI00909005.1	cDNA FLJ54014, highly similar to All-trans-retinol 13,14-reductase	0.0984	3	1	5	10	83280000				172900000	0.959	1		33320000	1.233	1		2	4	2	3	5	2	0.0437	0.0801	0.0401	0	0	0	0	549	60.6	8.25	2
IPI00922421.1	Aspartate aminotransferase	0.1667	3	2	5	8	0				67940000	1.321	2	23.6	36750000	2.031	1		1	4	2	1	4	3	0.0164	0.1366	0.0683	0	2.6	0	2.6	366	41	7.18	2
IPI00922838.1	cDNA FLJ56074, highly similar to 150 kDa oxygen-regulated protein	0.1784	6	1	14	26	292800000				68230000	0.848	1		111400000	0.779	1		4	7	7	8	9	9	0.0459	0.0989	0.0795	0	3.77	1.88	5.65	981	109.6	6.14	2
IPI00926839.1	Isoform 2 of Lanosterol 14-alpha demethylase	0.1733	4	1	6	9	151000000				98140000	0.557	1		10720000	0.747	1		1	5	2	1	6	2	0.0198	0.1436	0.0718	0	1.98	2.79	4.77	404	46.3	8.5	2
IPI00936002.1	Isoform 2 of Alpha-aminoadipic semialdehyde dehydrogenase	0.2055	5	1	9	31	58730000				15230000	0.862	1		56620000	0.995	1		5	2	5	12	10	9	0.1252	0.0626	0.1155	0	2.25	2.05	4.3	511	55.3	6.86	2
IPI00942773.1	cDNA FLJ57311, highly similar to GPI transamidase component PIG-T	0.0962	7	1	4	6	90470000				21440000	0.984	1		15040000	1.075	1		2	1	2	2	1	3	0.0337	0.0361	0.0625	0	1.85	2.75	4.6	416	47.2	9	2
IPI00944548.1	Isoform 4 of Serine/threonine-protein phosphatase 2A 55 kDa regulatory subunit B beta isoform	0.1657	10	1	8	16	21880000				384400000	1.266	1		126600000	1.318	1		2	5	5	3	6	7	0.0399	0.1038	0.1058	2.04	0	0	2.04	501	58.1	6.64	2
IPI00945434.1	Protein	0.0874	1	1	1	4	11210000				31470000	1.295	1		37140000	1.192	1		1	1	1	1	2	1	0.0874	0.0874	0.0874	0	0	0	0	183	20.2	4.67	2
IPI00946334.1	NADH dehydrogenase [ubiquinone] iron-sulfur protein 2, mitochondrial isoform 2 precursor	0.1794	3	1	8	11	323300000				399000000	0.782	1		29240000	0.585	1		4	3	2	5	3	3	0.081	0.0766	0.0613	0	2.71	0	2.71	457	51.8	8.15	2
IPI01011282.1	Uncharacterized protein	0.4372	6	3	7	9	59250000				24630000	0.721	1		27840000	0.788	1		1	4	3	2	4	3	0.0653	0.2161	0.2261	0	1.89	0	1.89	199	22.5	8.73	2
IPI01011853.1	cDNA FLJ35358 fis, clone PUAEN2000497, highly similar to Tubulin beta-6 chain	0.3369	8	2	11	43	669100000				594800000	1.511	2	74.6	610500000	0.769	1		7	7	6	14	16	13	0.2059	0.2246	0.2139	7.55	15.9	11.82	35.27	374	41.9	4.91	2
IPI01012126.1	Thioredoxin domain containing protein	0.2982	3	1	9	14	49000000				159900000	1.031	1		152600000	1.056	1		3	3	6	3	4	7	0.1028	0.1105	0.2365	0	0	0	0	389	43.6	6.13	2
IPI01013402.2	Uncharacterized protein	0.1386	3	1	11	14	131600000				68370000	0.551	1		719500000	0.715	1		7	3	4	7	3	4	0.104	0.0334	0.0507	0	0	0	0	808	91.2	6.43	2
IPI00012575.1	Pirin	0.0414	1	1	1	2	0				54680000	0.979	1		55900000	1.187	1			1	1		1	1		0.0414	0.0414		0	0	0	290	32.1	6.92	2
IPI00923597.3	Uncharacterized protein	0.0833	6	1	2	4	0				87000000	1.076	1		29120000	1.252	1			2	1		3	1		0.0833	0.0586		4.53	2.12	6.65	324	35.3	6.34	2
IPI00332499.1	Isoform 3 of Nuclear autoantigenic sperm protein	0.1405	6	1	10	18	158700000	2.51	1		215300000				93500000				7	2	4	10	2	6	0.0975	0.0241	0.0671	2.15	0	0	2.15	790	86.2	4.35	1
IPI00939419.2	cDNA FLJ58655, highly similar to Notchless homolog 1	0.0521	2	1	2	2	29580000	2.147	1		0				0				1		1	1		1	0.0239		0.0282	0		0	0	461	50.7	6.98	1
IPI00447606.1	very long-chain acyl-CoA synthetase isoform 2	0.0988	2	1	4	4	39990000	2.025	1		194900000				0				2	2		2	2		0.0547	0.0441		0	0		0	567	64.6	8.48	1
IPI00642894.1	excitatory amino acid transporter 1 isoform 2	0.1549	4	1	9	12	769600000	1.96	1		167900000				0				8	2	1	9	2	1	0.1469	0.0463	0.0362	0	0	0	0	497	55.1	9.01	1
IPI00793375.2	Isoform 1 of Xaa-Pro aminopeptidase 1	0.0899	4	1	6	8	414400000	1.858	1		574100000				0				4	3		5	3		0.0851	0.0449		0	0		0	623	69.9	5.67	1
IPI00217670.1	Isoform 1 of Ribonucleoprotein PTB-binding 1	0.0743	3	1	4	7	84580000	1.608	1		0				0				4			7			0.0743			0			0	606	63.8	8.48	1
IPI00017283.2	Isoleucyl-tRNA synthetase, mitochondrial	0.0455	1	1	4	5	47670000	1.477	1		548100000				0				3	2		3	2		0.0316	0.0287		1.87	2.69		4.56	1012	113.7	7.2	1
IPI00985176.2	cDNA, FLJ78887, highly similar to Guanine deaminase	0.1711	4	1	3	4	54840000	1.443	1		0				229500000				2		1	3		1	0.0842		0.0868	0		0	0	380	42.4	5.48	1
IPI00748037.4	cDNA FLJ54102, highly similar to Beta-soluble NSF attachment protein	0.3098	5	1	6	9	894300000	1.442	1		0				84740000				5		2	7		2	0.2706		0.0902	0		0	0	255	28.8	5.4	1
IPI00383695.1	Mitochondrial trifunctional protein beta subunit (Fragment)	0.1607	5	1	5	10	541000000	1.435	1		734800000				783600000				3	2	2	4	4	2	0.1518	0.058	0.058	1.67	0	0	1.67	224	24	8.44	1
IPI00019472.4	Neutral amino acid transporter B(0)	0.085	2	1	3	5	17190000	1.414	1		347600000				20410000				1	1	2	1	1	3	0.024	0.0259	0.061	0	0	0	0	541	56.6	5.48	1
IPI00745955.4	Probable rRNA-processing protein EBP2	0.2059	2	1	8	12	376900000	1.394	1		56100000				8032000				7	2	2	7	3	2	0.1667	0.0752	0.0784	0	0	0	0	306	34.8	10.1	1
IPI00893541.1	14 kDa protein	0.1707	1	1	2	2	60140000	1.393	1		0				0				2			2			0.1707			0			0	123	13.5	7.3	1
IPI00291939.1	Structural maintenance of chromosomes protein 1A	0.193	3	1	28	49	869900000	1.368	1		254600000				318300000				13	11	12	19	14	16	0.0843	0.09	0.0811	0	0	0	0	1233	143.1	7.64	1
IPI00102936.3	Isoform 2 of Signal recognition particle 68 kDa protein	0.1258	7	1	9	18	249600000	1.35	1		123800000				711600000				6	4	3	8	5	5	0.094	0.0638	0.0403	0	0	0	0	596	67.3	8.57	1
IPI00790530.1	Nuclear pore complex protein Nup85	0.128	4	1	8	13	398100000	1.349	1		45000000				2039000000				3	3	4	4	4	5	0.0549	0.0457	0.0808	4.82	0	0	4.82	656	75	5.55	1
IPI00917650.2	Protein PIEZO1	0.0492	1	1	13	15	488200000	1.342	1		172800000				326700000				4	6	4	4	7	4	0.0194	0.0206	0.0175	0	0	0	0	2521	286.6	7.47	1
IPI00385910.8	Isoform 3 of Synphilin-1	0.1152	4	1	13	23	217500000	1.322	1		191600000				59850000				6	7	6	8	8	7	0.0748	0.06	0.0758	0	0	0	0	1016	111.4	6.35	1
IPI00376344.3	Isoform 1 of Myosin-Ib	0.1039	3	1	13	17	101900000	1.308	1		20070000000				70670000				7	3	5	8	4	5	0.0713	0.0202	0.0361	0	0	0	0	1136	131.9	9.38	1
IPI01009730.1	Uncharacterized protein	0.16	3	1	10	16	52620000	1.306	1		37370000				131700000				5	2	5	5	2	9	0.0718	0.0218	0.0918	2.07	0	0	2.07	1100	122	5.9	1
IPI00553185.2	T-complex protein 1 subunit gamma	0.2899	6	3	15	22	192300000	1.283	2	39.3	144100000				1534000000				5	8	5	7	9	6	0.1229	0.1835	0.0936	2.18	0	2.54	4.72	545	60.5	6.49	1
IPI01013427.1	cDNA FLJ54667, highly similar to Serine/threonine-protein phosphatase 2A 65 kDa regulatory subunit A beta isoform	0.2682	8	1	9	17	201900000	1.279	1		30330000				33800000				7	2	4	10	3	4	0.2318	0.0659	0.1364	12	7.73	3.85	23.58	440	49.1	5.38	1
IPI00444708.3	Conserved hypothetical protein	0.0441	1	1	1	1	35750000	1.277	1		0				0				1			1			0.0441			0			0	204	22.6	10.67	1
IPI00218106.3	Isoform 2 of Transcription elongation factor A protein 1	0.3929	6	1	11	19	169900000	1.274	1		189400000				44580000				7	2	5	10	2	7	0.2607	0.0821	0.1929	2.2	0	0	2.2	280	31.6	8.53	1
IPI00456695.1	Isoform 2 of 26S proteasome non-ATPase regulatory subunit 1	0.0944	3	1	8	11	167500000	1.245	1		128500000				61610000				5	1	4	5	1	5	0.0694	0.0141	0.0401	0	0	0	0	922	102.2	5.27	1
IPI00217466.3	Histone H1.3	0.3575	6	3	9	12	102200000	1.242	3	2.2	239500000				131400000				4	3	3	6	3	3	0.2081	0.095	0.1448	3.37	0	0	3.37	221	22.3	11.02	1
IPI00829774.1	Isoform 4 of A-kinase anchor protein 13	0.0734	6	1	24	32	351300000	1.237	1		581500000				1248000000				11	8	8	12	10	10	0.0415	0.0294	0.0265	2.17	0	0	2.17	2793	305.1	5.2	1
IPI00017763.8	Uncharacterized protein	0.158	7	1	7	8	120900000	1.221	1		98740000				75040000				2	2	4	2	2	4	0.057	0.0725	0.0855	0	0	0	0	386	44.1	4.82	1
IPI00910902.1	cDNA FLJ50573, highly similar to Homo sapiens NAD(P)H dehydrogenase, quinone 1 (NQO1), transcript variant 3, mRNA	0.2426	4	1	4	5	73550000	1.219	1		74660000				78000000				3	1	1	3	1	1	0.1782	0.0644	0.0644	0	0	0	0	202	22.8	8.5	1
IPI00024719.1	Isoform A of Histone acetyltransferase type B catalytic subunit	0.0597	2	1	3	4	46640000	1.203	1		0				16730000				2		1	3		1	0.0406		0.0191	0		0	0	419	49.5	5.69	1
IPI00012007.6	Adenosylhomocysteinase	0.1296	2	1	4	7	111300000	1.194	1		54020000				96010000				4	1	1	5	1	1	0.1296	0.044	0.0278	2.25	1.63	0	3.88	432	47.7	6.34	1
IPI00641437.1	Uncharacterized protein	0.0683	2	1	13	17	371700000	1.187	1		55960000				124200000				9	2	5	9	2	6	0.0402	0.0126	0.0354	3.93	0	3.75	7.68	2063	233.1	6.6	1
IPI00477663.1	Isoform 4 of Reticulon-4	0.0688	11	1	7	12	130300000	1.183	1		217500000				143900000				3	5	2	3	7	2	0.0365	0.049	0.0229	0	0	0	0	960	106.3	4.49	1
IPI00910990.1	cDNA FLJ52680, highly similar to Aldo-keto reductase family 1 member C2	0.1246	7	1	4	8	133700000	1.183	1		33010000				50470000				2	2	2	3	3	2	0.0741	0.0842	0.0774	0	0	0	0	297	33.8	8.53	1
IPI00916783.1	Uncharacterized protein	0.2342	5	2	7	8	56230000	1.152	1		31170000				5346000				4	3	1	4	3	1	0.1351	0.1201	0.021	1.67	0	0	1.67	333	36.8	7.2	1
IPI00216951.2	Aspartyl-tRNA synthetase, cytoplasmic	0.1038	3	2	5	5	125900000	1.151	2	18.3	66630000				19600000				3	1	1	3	1	1	0.0559	0.0319	0.0299	0	0	0	0	501	57.1	6.55	1
IPI00794678.2	MHC class I antigen	0.1034	20	1	3	7	22670000	1.143	1		95160000				0				1	2	1	1	5	1	0.0219	0.0815	0.0596	0	1.71	0	1.71	319	36.3	5.47	1
IPI00022228.2	Vigilin	0.1585	4	3	23	32	770100000	1.137	3	3	192900000				136500000				13	4	10	15	4	13	0.0938	0.0339	0.0773	0	0	1.86	1.86	1268	141.4	6.87	1
IPI00014424.1	Elongation factor 1-alpha 2	0.2441	3	2	8	16	409900000	1.134	2	15.2	246500000				34650000				7	4	2	9	5	2	0.2289	0.1166	0.0756	3.3	0	0	3.3	463	50.4	9.03	1
IPI00470503.2	Isoform 3 of Inorganic pyrophosphatase 2, mitochondrial	0.1836	7	1	5	5	45130000	1.131	1		43840000				0				4	1		4	1		0.1311	0.0525		0	2.14		2.14	305	34.6	8.46	1
IPI00429191.3	Eukaryotic peptide chain release factor subunit 1	0.1487	3	1	6	9	40180000	1.126	1		654800000				0				3	4		4	5		0.0618	0.1098		0	0		0	437	49	5.71	1
IPI00856098.2	p180/ribosome receptor	0.2929	4	1	16	22	2030000000	1.121	1		253800000				241400000				7	5	7	8	6	8	0.0669	0.0455	0.2253	0	0	0	0	1540	165.6	8.97	1
IPI00903145.1	Radixin	0.2178	8	3	13	19	213600000	1.12	1		98500000				242100000				7	3	6	8	3	8	0.1132	0.0652	0.1252	3.98	3.36	6.34	13.68	583	68.5	6.37	1
IPI00655534.3	Isoform 3 of Ubiquitin conjugation factor E4 B	0.099	3	1	10	15	600000000	1.118	1		1099000000				249700000				7	4	2	7	6	2	0.0726	0.05	0.0217	0	0	0	0	1061	121.7	6.2	1
IPI00807557.1	PA2G4 protein (Fragment)	0.2069	5	3	11	14	261400000	1.117	2	4.5	31110000				453000000				9	2	1	11	2	1	0.1823	0.0419	0.0271	0	0	0	0	406	45.1	8.95	1
IPI00909083.1	eukaryotic peptide chain release factor GTP-binding subunit ERF3A isoform 2	0.1557	2	1	8	9	146100000	1.113	1		382200000				37230000				5	3	1	5	3	1	0.1101	0.0503	0.0236	1.8	0	0	1.8	636	68.5	5.33	1
IPI01014177.1	Uncharacterized protein	0.1564	5	1	3	5	36590000	1.113	1		32000000				0				1	1	1	2	2	1	0.0332	0.0664	0.0569	1.64	0	0	1.64	211	23.9	4.89	1
IPI00978387.1	Uncharacterized protein	0.1016	11	3	9	10	526800000	1.112	1		87210000				14240000				7	2	1	7	2	1	0.0743	0.0284	0.0131	2.63	0	0	2.63	915	102.9	5.6	1
IPI00939159.6	Adenylyl cyclase-associated protein	0.1848	2	1	6	17	89190000	1.109	1		21660000				77450000				3	3	3	5	7	5	0.097	0.1178	0.0947	2.49	2.37	2.32	7.18	433	47.1	8.28	1
IPI00871221.1	Isoform 2 of Sodium/potassium-transporting ATPase subunit beta-1	0.1927	3	1	5	10	46780000	1.098	1		32960000				1845000000				3	2	3	4	3	3	0.1163	0.0797	0.1462	0	0	0	0	301	34.9	8.65	1
IPI00168262.2	Procollagen galactosyltransferase 1	0.2476	2	3	14	18	33910000000	1.094	1		220800000				42650000				5	7	6	5	7	6	0.0868	0.1206	0.1222	0	2.37	4.2	6.57	622	71.6	7.31	1
IPI00399170.1	Isoform 2 of Regulator of nonsense transcripts 1	0.0984	2	2	9	10	28330000	1.094	1		233100000				43760000				3	5	2	3	5	2	0.0474	0.0403	0.0259	0	0	0	0	1118	123	6.68	1
IPI00911038.2	apoptotic chromatin condensation inducer in the nucleus isoform 3	0.2291	7	2	27	49	620900000	1.093	1		92490000				1038000000				11	9	14	19	14	16	0.1061	0.0723	0.1407	0	0	1.6	1.6	1301	147.3	6.73	1
IPI00006451.7	Vesicle-fusing ATPase	0.1425	2	1	8	16	128700000	1.089	1		78930000				56270000				6	4	3	7	5	4	0.1089	0.0685	0.0578	0	0	0	0	744	82.5	6.95	1
IPI00010207.1	Isoform 1 of Ubiquitin-fold modifier 1	0.3176	2	1	4	11	154400000	1.08	1		685000000				148700000				3	1	2	4	3	4	0.2353	0.1176	0.2941	0	0	0	0	85	9.1	9.31	1
IPI00451401.3	Isoform 2 of Triosephosphate isomerase	0.2129	4	1	5	5	92310000	1.053	1		49340000				0				4	1		4	1		0.2129	0.0361		1.84	0		1.84	249	27.1	8.24	1
IPI00749304.2	Isoform 2 of Synembryn-A	0.0914	5	1	6	15	803200000	1.052	1		303400000				535500000				6	3	4	8	3	4	0.0914	0.0667	0.061	0	0	0	0	525	58.9	6.61	1
IPI00908495.1	cDNA FLJ60127, highly similar to Ubiquilin-2	0.1393	3	1	3	5	200600000	1.041	1		138100000				47780000				2	1	1	3	1	1	0.1086	0.0328	0.0307	0	0	0	0	488	52.9	6.42	1
IPI00300622.4	cDNA FLJ55639, highly similar to Cytosolic beta-glucosidase	0.0766	1	1	3	3	103800000	1.04	1		0				24550000				1		2	1		2	0.0149		0.0617	0		0	0	470	54.1	5.54	1
IPI00926316.1	cDNA, FLJ79126, highly similar to Zyxin	0.0578	4	1	3	8	371100000	1.027	1		7560000000				0				2	2		4	4		0.0578	0.0217		2.21	0		2.21	415	45	8.22	1
IPI00329545.7	Isoform 3 of RNA-binding protein 26	0.2153	7	1	20	28	1506000000	1.019	1		157900000				266600000				10	5	7	12	6	10	0.1214	0.0469	0.0857	0	0	0	0	980	110.6	9.07	1
IPI00026689.4	Putative uncharacterized protein DKFZp686L20222	0.2277	132	2	5	5	55430000	1.012	2	2.2	0				0				4	1		4	1		0.1749	0.0528		2.37	0		2.37	303	34.8	8.95	1
IPI00003269.1	Beta-actin-like protein 2	0.1383	1	1	4	42	10510000000	1.011	1		4990000000				2124000000				4	4	3	18	14	10	0.1383	0.1383	0.1197	3.61	7.95	4.01	15.57	376	42	5.59	1
IPI00301323.1	ATP-dependent RNA helicase DDX18	0.1358	1	1	10	20	96230000	1.011	1		157700000				92640000				1	6	6	2	8	10	0.0209	0.0866	0.0866	0	0	0	0	670	75.4	9.5	1
IPI00219077.4	Isoform 1 of Leukotriene A-4 hydrolase	0.1178	4	1	7	9	46580000	1.005	1		1308000				40640000				3	1	4	3	1	5	0.0573	0.0098	0.0606	0	0	0	0	611	69.2	6.18	1
IPI00016513.5	Ras-related protein Rab-10	0.23	1	1	4	24	124200000	1.003	1		110000000				103200000				3	4	4	8	6	10	0.17	0.23	0.23	1.87	0	0	1.87	200	22.5	8.38	1
IPI00001539.8	3-ketoacyl-CoA thiolase, mitochondrial	0.1335	1	2	5	6	89240000	1	2	4.9	0				71170000				4		1	5		1	0.0831		0.0504	0		0	0	397	41.9	8.09	1
IPI00017895.3	Isoform 1 of Glycerol-3-phosphate dehydrogenase, mitochondrial	0.0949	3	1	8	12	86930000	0.983	1		130600000				57640000				3	4	3	3	4	5	0.0509	0.0605	0.0399	2.16	1.62	0	3.78	727	80.8	7.69	1
IPI00217121.1	Uncharacterized protein C19orf21	0.0957	1	1	6	8	557800000	0.981	1		119700000				167500000				2	3	3	2	3	3	0.0457	0.0339	0.0501	2.2	0	0	2.2	679	75.3	6.83	1
IPI00017592.1	Isoform 1 of LETM1 and EF-hand domain-containing protein 1, mitochondrial	0.1069	1	1	7	9	88980000	0.979	1		61110000				231300000				2	4	2	2	5	2	0.0284	0.0636	0.0311	0	0	0	0	739	83.3	6.7	1
IPI00293242.1	Isoform 2 of General transcription factor II-I	0.2069	6	2	16	21	111100000	0.975	1		913800000				95030000				8	5	5	8	5	8	0.1024	0.0596	0.0763	1.94	0	0	1.94	957	107.9	7.94	1
IPI00017381.1	Replication factor C subunit 4	0.1543	2	1	6	14	86910000	0.962	1		74840000				53460000				3	4	2	3	9	2	0.0882	0.0937	0.0579	0	0	0	0	363	39.7	8.02	1
IPI00784170.2	Isoform 2 of Probable ATP-dependent RNA helicase DHX36	0.1207	5	1	14	20	207100000	0.959	1		634400000				326500000				6	7	4	6	8	6	0.0604	0.0734	0.0241	1.82	0	0	1.82	994	113.1	7.66	1
IPI01024746.1	Protein	0.2143	3	3	6	7	69450000	0.926	3	12.4	70950000				47020000				3	2	1	4	2	1	0.0992	0.0754	0.0397	0	0	0	0	252	29	8.48	1
IPI00793201.1	aminoacyl tRNA synthase complex-interacting multifunctional protein 1 isoform b precursor	0.1786	4	1	4	5	67390000	0.925	1		28380000				50910000				2	2	1	2	2	1	0.0714	0.1071	0.0506	0	0	1.78	1.78	336	37	8.65	1
IPI00009680.3	39S ribosomal protein L44, mitochondrial	0.0753	1	1	2	4	20180000	0.92	1		23270000				10630000				1	1	2	1	1	2	0.0392	0.0392	0.0753	0	1.69	0	1.69	332	37.5	8.4	1
IPI00021435.3	26S protease regulatory subunit 7	0.2263	3	2	8	14	81310000	0.896	1		24650000				64470000				5	4	3	6	4	4	0.1432	0.1132	0.0901	1.94	1.68	1.81	5.43	433	48.6	5.95	1
IPI00514701.1	Isoform 2 of Mitotic checkpoint protein BUB3	0.1718	4	1	5	10	17850000	0.871	1		49860000				110700000				2	2	3	2	2	6	0.0613	0.0613	0.1227	2.06	0	0	2.06	326	36.9	6.84	1
IPI00007940.6	erlin-1	0.1552	6	1	4	4	74360000	0.862	1		10260000				22810000				2	1	1	2	1	1	0.0632	0.0517	0.069	0	0	0	0	348	39.1	7.87	1
IPI00925393.1	CaiB/baiF CoA-transferase family protein C7orf10 isoform 2	0.073	6	1	3	14	59100000	0.844	1		2763000				2243000				3	1	1	6	3	5	0.073	0.0252	0.0252	0	0	0	0	397	43.4	8.27	1
IPI00029741.1	Integrin beta-5	0.1139	1	1	7	11	35050000	0.839	1		31540000				17320000				6	1	1	9	1	1	0.1014	0.0175	0.0125	4.76	0	0	4.76	799	88	6.06	1
IPI00020632.4	Argininosuccinate synthase	0.3111	3	2	11	23	1305000000	0.814	1		357800000				61590000				6	4	4	8	8	7	0.1733	0.1067	0.1311	0	6.16	3.73	9.89	450	50.8	8.4	1
IPI00018798.3	DnaJ homolog subfamily C member 17	0.3487	1	1	11	12	27010000	0.813	1		22150000				168100000				4	2	6	4	2	6	0.1908	0.0395	0.1776	2.55	0	0	2.55	304	34.7	8.53	1
IPI00014474.1	A-kinase anchor protein 8	0.0968	1	1	5	8	43190000	0.8	1		153400000				155300000				2	2	3	2	2	4	0.0549	0.0419	0.052	0	0	0	0	692	76.1	5.15	1
IPI00029629.4	E3 ubiquitin/ISG15 ligase TRIM25	0.1159	1	1	6	7	268700000	0.8	1		0				129400000				4		3	4		3	0.073		0.073	4.04		0	4.04	630	70.9	8.09	1
IPI00910819.2	cDNA FLJ60194, highly similar to WW domain-binding protein 11	0.14	2	1	9	16	300900000	0.799	1		112600000				386100000				5	4	3	5	4	7	0.0988	0.061	0.0643	0	0	0	0	607	66.8	8.07	1
IPI00477971.4	Transducin beta-like protein 3	0.073	1	1	6	7	188800000	0.762	1		319500000				0				3	3		3	4		0.0433	0.0297		1.73	0		1.73	808	89	6.9	1
IPI00646339.1	cDNA FLJ14104 fis, clone MAMMA1001198, highly similar to Epidermal growth factor receptor substrate 15-like 1	0.118	3	1	6	7	64350000	0.735	1		444400000				0				4	2	1	4	2	1	0.0729	0.0345	0.0305	1.67	1.71	0	3.38	754	83.2	5.08	1
IPI00030131.3	Isoform Beta of Lamina-associated polypeptide 2, isoforms beta/gamma	0.3062	5	2	10	13	168100000	0.717	2	176.6	68630000				36830000				8	4	1	8	4	1	0.2687	0.1013	0.0485	0	0	0	0	454	50.6	9.38	1
IPI00220271.3	Alcohol dehydrogenase [NADP+]	0.0985	4	1	3	3	48750000	0.709	1		38250000				213700000				1	1	1	1	1	1	0.0246	0.0369	0.0369	0	0	0	0	325	36.5	6.79	1
IPI00438230.3	Isoform 2 of Transcription intermediary factor 1-beta	0.0452	2	1	3	3	54780000	0.66	1		163700000				0				1	2		1	2		0.0146	0.0305		0	0		0	753	79.4	5.99	1
IPI00640357.1	ubiquitin carboxyl-terminal hydrolase 14 isoform b	0.0871	3	1	3	3	5241000	0.655	1		498700000				94580000				1	1	1	1	1	1	0.0523	0.0196	0.0153	0	0	0	0	459	52.4	5.78	1
IPI00216219.3	Isoform Long of Tight junction protein ZO-1	0.0767	5	1	15	21	2635000000	0.617	1		65370000				554300000				7	6	5	9	7	5	0.04	0.0326	0.0286	0	0	0	0	1748	195.3	6.7	1
IPI00787306.1	regulator of chromosome condensation isoform b	0.1644	8	1	6	9	116200000	0.6	1		46250000				0				5	1		8	1		0.1507	0.0251		0	0		0	438	46.7	8.06	1
IPI00021129.5	Isoform 1 of AP-3 complex subunit beta-1	0.1737	8	2	19	67	694300000	0.55	2	40.4	168900000				220000000				12	9	4	21	27	19	0.1289	0.0932	0.042	0	0	0	0	1094	121.2	6.04	1
IPI00965308.1	Uncharacterized protein	0.1958	3	2	8	12	215100000	0.542	1		188600000				117800000				5	2	3	6	3	3	0.158	0.0519	0.0873	0	0	2.17	2.17	424	47.3	7.74	1
IPI00910344.1	cDNA FLJ58317, highly similar to Adaptor-relatedprotein complex 1 mu-1 subunit	0.0595	4	1	2	2	26470000	0.509	1		0				478000000				1		1	1		1	0.0378		0.0216	1.89		0	1.89	370	42.6	6.64	1
IPI00845432.1	Isoform 1 of NAD kinase domain-containing protein 1	0.2059	4	2	6	7	42090000	0.361	1		49590000				92010000				3	2	2	3	2	2	0.1312	0.0498	0.052	1.9	0	0	1.9	442	49.4	8.18	1
IPI00031131.4	Isoform 1 of Adipocyte plasma membrane-associated protein	0.2236	3	1	6	17	60310000	0.287	1		14770000				1148000000				4	2	3	7	2	8	0.1779	0.1154	0.125	1.7	1.75	0	3.45	416	46.5	6.16	1
IPI00294536.2	cDNA FLJ51909, highly similar to Serine-threonine kinase receptor-associatedprotein	0.1212	4	1	4	5	80170000	0.279	1		69330000				0				2	2		3	2		0.0716	0.0496		1.98	3.25		5.23	363	39.8	5.31	1
IPI00221325.3	E3 SUMO-protein ligase RanBP2	0.0847	2	2	26	32	1718000000	0.225	1		274500000				1241000000				11	11	8	12	11	9	0.0344	0.0372	0.0273	1.88	0	0	1.88	3224	358	6.2	1
IPI00848320.1	ATPase, F1/V1/A1 complex, alpha/beta subunit, nucleotide-binding domain containing protein	0.1749	3	1	6	6	48800000	0.199	1		75720000				0				4	2		4	2		0.0961	0.0788		2.89	0		2.89	406	45.4	5.11	1
IPI00549500.4	Uncharacterized protein C12orf68	0.0515	2	1	1	1	148800000	0.167	1		0				0				1			1			0.0515			0			0	194	20.5	4.16	1
IPI00006504.3	Isoform 1 of Translation initiation factor eIF-2B subunit gamma	0.1681	4	1	7	9	833600000	0.081	1		197900000				1077000000				3	4	1	3	5	1	0.0929	0.0885	0.0332	0	0	0	0	452	50.2	6.47	1
IPI00604549.1	Isoform 2 of Phosphatidylinositol-3,4,5-trisphosphate 5-phosphatase 1	0.0564	3	1	8	8	312100000	0.058	1		1014000000				84500000				4	2	2	4	2	2	0.0345	0.016	0.0143	0	0	0	0	1188	133.1	7.59	1
IPI00002214.1	Importin subunit alpha-2	0.1134	1	1	5	9	198000000				222200000				33240000	1.081	1		4	2	2	5	2	2	0.0851	0.0359	0.0435	0	0	0	0	529	57.8	5.4	1
IPI00003886.3	Isoform 2 of Guanine nucleotide-binding protein-like 3	0.1546	2	1	8	10	196600000				85730000	2.167	1		0				6	3		7	3		0.1136	0.0689		4.19	4.01		8.2	537	60.5	8.79	1
IPI00004233.2	Isoform Long of Antigen KI-67	0.1542	3	1	53	76	582500000				2255000000	1.159	1		1539000000				27	21	18	29	25	22	0.0823	0.0774	0.0645	0	2.21	0	2.21	3256	358.5	9.45	1
IPI00004358.4	Glycogen phosphorylase, brain form	0.1079	1	1	8	9	154200000				413100000	1.322	1		229500000				2	4	3	2	4	3	0.0308	0.0581	0.0581	0	0	0	0	843	96.6	6.86	1
IPI00004534.5	Phosphoribosylformylglycinamidine synthase	0.0897	1	2	9	15	40810000				48780000	0.938	1		103600000				3	4	5	3	5	7	0.0262	0.0493	0.0463	2.72	0	4.2	6.92	1338	144.6	5.76	1
IPI00004968.1	Pre-mRNA-processing factor 19	0.1548	3	1	6	9	35230000				55970000	0.615	1		160200000				2	2	4	2	2	5	0.0496	0.0833	0.0774	0	2.16	0	2.16	504	55.1	6.61	1
IPI00005969.3	F-actin-capping protein subunit alpha-1	0.1643	1	1	4	4	108200000				72570000	0.807	1		0				1	3		1	3		0.035	0.1294		0	0		0	286	32.9	5.69	1
IPI00007074.5	Tyrosyl-tRNA synthetase, cytoplasmic	0.1989	1	2	8	8	24270000				1342000000	1.055	1		201900000				2	2	4	2	2	4	0.0436	0.036	0.1307	0	0	3.6	3.6	528	59.1	7.05	1
IPI00008557.6	Insulin-like growth factor 2 mRNA-binding protein 1	0.1594	1	1	7	9	51900000				37460000	1.098	1		123000000				1	2	4	1	3	5	0.0225	0.0607	0.0763	0	0	0	0	577	63.4	9.2	1
IPI00009865.4	Keratin, type I cytoskeletal 10	0.4932	25	14	27	86	2471000000				521300000	0.495	1		311700000				23	13	11	38	25	23	0.4538	0.2945	0.2791	68.44	80.25	68.58	217.27	584	58.8	5.21	1
IPI00009896.1	Epoxide hydrolase 1	0.189	1	2	7	11	8970000				68390000				193600000	0.795	1		1	5	5	1	5	5	0.0242	0.1538	0.1363	0	0	2.14	2.14	455	52.9	7.25	1
IPI00010165.3	zinc finger protein 287	0.134	1	1	7	9	149600000				189000000	0.113	1		14120000				4	2	3	4	2	3	0.0802	0.0276	0.0683	0	0	0	0	761	88.3	8.56	1
IPI00012462.1	Eukaryotic translation initiation factor 2A	0.1609	6	1	6	8	0				263500000	0.976	1		61600000				1	4	3	1	4	3	0.0443	0.1034	0.0608	0	0	0	0	609	67.8	9.04	1
IPI00014516.2	Isoform 1 of Caldesmon	0.1677	10	1	12	14	157500000				1451000000				9277000	1.208	1		5	5	3	6	5	3	0.0769	0.0656	0.0454	0	0	2.27	2.27	793	93.2	5.66	1
IPI00016910.1	Eukaryotic translation initiation factor 3 subunit C	0.1544	7	1	13	17	389500000				93440000				51340000	0.396	1		9	2	4	10	2	5	0.0898	0.0241	0.0756	0	0	3.57	3.57	913	105.3	5.68	1
IPI00017339.1	Splicing factor 3B subunit 4	0.0943	1	1	3	4	0				20310000	0.198	1		0				2	2		2	2		0.0401	0.0778		0	0		0	424	44.4	8.56	1
IPI00019380.1	Nuclear cap-binding protein subunit 1	0.0924	1	1	6	8	5259000				182400000	0.735	1		214900000				2	3	1	2	4	2	0.0354	0.0481	0.0089	0	1.66	0	1.66	790	91.8	6.43	1
IPI00020557.2	Prolow-density lipoprotein receptor-related protein 1	0.0555	1	1	27	41	1298000000				1302000000	1.069	1		340500000				7	13	14	7	16	18	0.0139	0.0301	0.0313	0	2.27	0	2.27	4544	504.3	5.39	1
IPI00023647.4	Isoform 1 of Ubiquitin-like modifier-activating enzyme 6	0.1141	2	1	8	10	94550000				36880000	0.967	1		144700000				2	4	2	2	6	2	0.038	0.0532	0.0228	0	0	0	0	1052	117.9	6.14	1
IPI00029764.1	Splicing factor 3A subunit 3	0.1277	2	2	6	12	181200000				158100000				121100000	2.313	2	110	5	2	3	7	2	3	0.0978	0.0419	0.0719	0	0	2.59	2.59	501	58.8	5.38	1
IPI00030243.1	Isoform 1 of Proteasome activator complex subunit 3	0.2441	4	2	6	15	92720000				50550000				56350000	1.247	1		5	5	4	5	6	4	0.2165	0.2165	0.1732	3.04	4.96	5.7	13.7	254	29.5	5.95	1
IPI00032561.1	Calcium-binding protein 39	0.2141	1	1	7	9	129100000				102000000	1.486	1		381600000				2	3	3	2	4	3	0.0469	0.0938	0.0968	0	0	0	0	341	39.8	6.89	1
IPI00033130.3	SUMO-activating enzyme subunit 1	0.2139	2	1	6	6	11230000				111000000	1.56	1		71790000				2	2	2	2	2	2	0.0549	0.0751	0.0838	0	2.36	0	2.36	346	38.4	5.3	1
IPI00063188.1	Isoform 2 of Evolutionarily conserved signaling intermediate in Toll pathway, mitochondrial	0.1182	2	1	3	4	131100000				26530000	0.585	1		27120000				1	1	2	1	1	2	0.0304	0.0574	0.0608	0	0	0	0	296	33.2	9.13	1
IPI00102815.1	Nucleolar complex protein 3 homolog	0.1463	3	1	11	13	906300000				108000000	1.336	1		50190000				3	6	2	4	7	2	0.0475	0.0813	0.0175	0	0	0	0	800	92.5	9.17	1
IPI00104050.3	Thyroid hormone receptor-associated protein 3	0.3047	10	2	30	51	505800000				5291000000				493400000	1.581	1		16	11	10	19	19	13	0.1906	0.1079	0.1089	0	0	0	0	955	108.6	10.15	1
IPI00165092.3	Tyrosyl-tRNA synthetase, mitochondrial	0.1237	2	1	5	14	95820000				132100000				83710000	0.789	1		3	3	3	6	5	3	0.0755	0.0797	0.0818	0	0	1.94	1.94	477	53.2	8.98	1
IPI00168691.8	SHC SH2 domain-binding protein 1	0.0923	1	2	5	5	252000000				103400000	3.885	2	689.2	0				2	3		2	3		0.0387	0.0536		0	0		0	672	75.6	4.75	1
IPI00169325.1	WD repeat-containing protein 36	0.102	1	1	8	14	366000000				57130000	1.259	1		725900000				4	3	3	6	4	4	0.0505	0.04	0.041	0	0	0	0	951	105.3	7.53	1
IPI00171626.3	Lysophosphatidylcholine acyltransferase 1	0.0749	1	1	5	28	11950000				2078000000				31300000000	0.249	1		3	4	2	8	10	10	0.0431	0.0637	0.0468	0	3.61	3.8	7.41	534	59.1	6.02	1
IPI00171665.1	Nucleoporin Nup37	0.1166	1	1	3	3	271800000				13560000	0.967	1		0				1	1	1	1	1	1	0.0307	0.0491	0.0368	0	1.99	0	1.99	326	36.7	5.92	1
IPI00171798.1	Metastasis-associated protein MTA2	0.1677	2	1	11	14	153500000				19840000	1	1		336100000				7	2	3	8	3	3	0.0973	0.0344	0.0524	0	1.63	0	1.63	668	75	9.66	1
IPI00182728.2	Vacuolar protein sorting-associated protein 4B	0.1306	4	1	6	8	262000000				40540000	1.3	1		96600000				3	2	2	4	2	2	0.0563	0.0518	0.0518	0	0	0	0	444	49.3	7.23	1
IPI00186139.8	Similar to Protein KRI1 homolog	0.1497	2	1	10	11	251900000				50530000	1.208	1		287100000				5	3	3	5	3	3	0.0655	0.0615	0.0361	0	2.17	0	2.17	748	87.1	5.21	1
IPI00215687.1	Isoform 3 of Glutaminase kidney isoform, mitochondrial	0.1187	2	1	5	10	149300000				10370000				45210000	0.911	1		3	1	3	3	1	6	0.0569	0.0268	0.0769	0	0	0	0	598	65.4	7.88	1
IPI00217030.10	40S ribosomal protein S4, X isoform	0.1293	3	1	4	6	17670000				23220000				19070000	0.801	1		3	1	1	3	1	2	0.0951	0.0342	0.038	0	0	0	0	263	29.6	10.15	1
IPI00217686.4	Putative rRNA methyltransferase 3	0.2019	1	1	12	18	321300000				367400000	0.518	1		355400000				6	4	4	8	5	5	0.0779	0.059	0.0885	0	2.46	0	2.46	847	96.5	8.4	1
IPI00218435.1	Isoform 2 of U4/U6 small nuclear ribonucleoprotein Prp4	0.1727	2	1	7	9	165900000				18890000	0.32	1		500900000				4	2	2	4	2	3	0.0902	0.0672	0.0499	0	2.46	0	2.46	521	58.3	7.42	1
IPI00219299.4	Talin-2	0.1408	1	1	32	36	688000000				365200000	0.198	1		510700000				12	11	11	14	11	11	0.0472	0.0578	0.0531	0	0	0	0	2542	271.4	5.57	1
IPI00219330.2	Isoform 5 of Interleukin enhancer-binding factor 3	0.1913	8	2	14	31	1162000000				1090000000				645500000	72.469	1		8	8	5	12	11	8	0.1232	0.1449	0.0884	0	0	0	0	690	74.6	8.24	1
IPI00240812.6	Uncharacterized protein	0.105	7	1	15	18	818700000				131500000	0.559	1		806800000				9	2	4	11	2	5	0.0656	0.0166	0.0304	0	0	0	0	1448	164.7	8.47	1
IPI00290272.2	DNA polymerase alpha subunit B	0.1254	2	1	3	4	1163000000				444800000				10390000	0.829	1		1	2	1	1	2	1	0.0669	0.0953	0.0301	0	0	0	0	598	65.9	5.24	1
IPI00292020.3	Spermidine synthase	0.1556	1	1	5	5	599300000				122400000	1.159	1		35420000				1	2	2	1	2	2	0.0464	0.0563	0.0993	0	0	0	0	302	33.8	5.49	1
IPI00293350.3	Translin-associated protein X	0.2724	1	1	6	28	1131000				282800000				67120000	1.091	1		2	2	6	5	9	14	0.0966	0.0966	0.2724	0	0	0	0	290	33.1	6.55	1
IPI00293464.5	DNA damage-binding protein 1	0.0632	6	1	6	14	76630000				212600000	0.883	1		304000000				4	4	3	5	5	4	0.0316	0.0561	0.0351	0	3.99	0	3.99	1140	126.9	5.26	1
IPI00294610.4	Isoform 1 of DnaJ homolog subfamily A member 3, mitochondrial	0.1125	3	1	3	5	1873000				7060000	3.438	1		227500000				1	2	2	1	2	2	0.0375	0.0854	0.075	0	0	0	0	480	52.5	9.26	1
IPI00299254.4	Eukaryotic translation initiation factor 5B	0.1066	1	1	14	23	251200000				238400000	1.335	1		235000000				6	6	6	7	7	9	0.0549	0.0533	0.0328	0	0	0	0	1220	138.7	5.49	1
IPI00299524.2	Condensin complex subunit 1	0.1356	3	1	17	22	65840000				35020000				68790000	1.079	1		8	5	5	11	6	5	0.0692	0.0457	0.0407	0	2.87	0	2.87	1401	157.1	6.61	1
IPI00301489.3	Uroporphyrinogen decarboxylase	0.1826	5	1	5	6	16380000				4730000				21680000	1.445	1		2	2	1	3	2	1	0.0817	0.0409	0.0599	0	0	4.06	4.06	367	40.8	6.14	1
IPI00305383.1	Cytochrome b-c1 complex subunit 2, mitochondrial	0.1744	1	2	5	8	70980000				44310000	1.4	2	13.7	35920000				1	4	1	1	5	2	0.0419	0.1325	0.0309	0	8.75	0	8.75	453	48.4	8.63	1
IPI00306661.3	E3 ubiquitin-protein ligase KCMF1	0.1365	1	1	5	5	105500000				85100000				6319000	0.783	1		2	2	1	2	2	1	0.042	0.0577	0.0367	0	0	1.61	1.61	381	41.9	5.66	1
IPI00329536.2	Early endosome antigen 1	0.163	1	1	19	21	374400000				29430000	0.918	1		62130000				9	6	5	10	6	5	0.0801	0.0602	0.0461	0	2.92	0	2.92	1411	162.4	5.68	1
IPI00394758.1	Isoform 2 of Fatty aldehyde dehydrogenase	0.1929	2	1	10	10	107500000				44360000				14400000	1.601	1		3	2	5	3	2	5	0.0591	0.0354	0.1122	0	0	3.13	3.13	508	57.6	8.92	1
IPI00396963.5	Isoform 2 of Dual serine/threonine and tyrosine protein kinase	0.1765	3	1	15	19	397500000				709400000	0.942	1		346900000				4	7	6	6	7	6	0.0894	0.0735	0.0747	0	0	0	0	884	99.9	6.67	1
IPI00409593.2	Isoform 4 of LIM domain only protein 7	0.1958	7	1	30	47	11950000000				240700000	1.265	1		205700000				13	9	16	15	15	17	0.0979	0.0638	0.1016	1.77	0	0	1.77	1614	185.1	7.97	1
IPI00411937.4	Nucleolar protein 56	0.197	3	2	7	12	91590000				40880000	1.685	1		37010000				4	6	2	4	6	2	0.1296	0.165	0.064	0	5.01	2.42	7.43	594	66	9.19	1
IPI00413365.3	Isoform 1 of Zinc finger protein 318	0.0926	2	1	19	32	632200000				52340000				478700000	1.164	1		8	5	9	11	8	13	0.0452	0.0219	0.0355	2.01	0	1.98	3.99	2279	251	7.2	1
IPI00418336.3	Isoform 2 of Integrator complex subunit 3	0.1411	4	1	11	11	112200000				102600000				121800000	0.76	1		4	4	3	4	4	3	0.0633	0.0528	0.0336	0	0	0	0	1042	117.9	5.8	1
IPI00429689.3	Serine/threonine-protein phosphatase 2A catalytic subunit beta isoform	0.2104	4	1	4	4	0				51700000	0.866	1		181500000				1	2	1	1	2	1	0.0194	0.1424	0.0485	0	0	0	0	309	35.6	5.43	1
IPI00431127.4	Isoform 3 of Cyclin-K	0.1138	5	1	4	5	82830000				13720000	1.072	1		54940000				1	1	2	1	2	2	0.0238	0.0423	0.0476	0	0	0	0	378	43.4	8.31	1
IPI00464993.4	1-acylglycerol-3-phosphate O-acyltransferase 2	0.086	2	1	2	3	15620000				28700000	12.208	1		45920000				1	1	1	1	1	1	0.0466	0.0466	0.0394	0	0	0	0	279	31	9.01	1
IPI00479143.3	Isoform 1 of Pericentrin	0.116	2	1	40	51	6617000000				13050000000	0.934	1		2270000000				19	13	13	22	14	15	0.0528	0.0483	0.0456	0	2.57	0	2.57	3336	377.8	5.55	1
IPI00479145.3	Keratin, type I cytoskeletal 19	0.195	22	1	9	16	1632000000				9034000				255700000	0.44	1		7	2	3	10	3	3	0.1375	0.0725	0.1225	0	7.23	3.42	10.65	400	44.1	5.14	1
IPI00607879.1	Uncharacterized protein	0.1307	5	1	7	10	5405000				16660000	0.765	1		43980000				1	3	3	2	4	4	0.0244	0.0575	0.0557	0	0	0	0	574	65.1	9.67	1
IPI00639819.1	Uncharacterized protein	0.2068	4	1	5	8	42360000				85120000	1.258	1		692100000				2	3	3	2	3	3	0.0881	0.1322	0.1051	0	2.43	1.94	4.37	295	33.4	6.55	1
IPI00640703.3	Exportin-5	0.0947	4	2	9	14	106800000				246400000	1.105	1		36520000				3	6	3	3	6	5	0.0341	0.0714	0.0307	0	3.22	0	3.22	1204	136.2	5.8	1
IPI00640875.2	Isoform 3 of Lysine-specific demethylase 5C	0.1293	5	1	17	35	193800000				301300000				3029000000	1.167	1		5	9	6	8	15	12	0.0303	0.0699	0.0574	0	0	0	0	1516	170.5	5.45	1
IPI00641153.3	Isoform 1 of Golgi apparatus protein 1	0.123	3	1	15	21	143500000				145000000				74720000	1.144	1		5	8	5	5	8	8	0.0365	0.0729	0.045	0	2.22	1.98	4.2	1179	134.5	6.9	1
IPI00642510.3	testis-expressed sequence 10 protein isoform 2	0.0997	3	1	9	19	49680000				137900000				64350000	1.243	1		4	5	4	4	6	9	0.0559	0.0537	0.0504	0	0	0	0	913	103.8	9.36	1
IPI00645179.3	Isoform 1 of Myopalladin	0.0629	2	1	7	7	420900000				21130000	1.067	1		263000000				2	4	1	2	4	1	0.0295	0.0295	0.0129	0	0	0	0	1320	145.2	6.77	1
IPI00719549.2	RBM14-RBM4 protein isoform 1	0.1563	4	1	6	11	141100000				1402000				1046000000	1.092	1		2	2	3	2	5	4	0.0619	0.056	0.1062	0	0	0	0	339	37	8.48	1
IPI00735181.2	Isoform 2 of Protein unc-45 homolog A	0.1485	2	2	10	11	19160000				1618000000	0.917	2	6	202000000				2	5	4	2	5	4	0.0355	0.0775	0.0581	2.27	1.78	0	4.05	929	101.6	6.06	1
IPI00736464.1	FLJ00395 protein (Fragment)	0.1149	4	1	15	22	581900000				275100000				469600000	1.521	1		6	7	6	7	8	7	0.057	0.0597	0.0525	0	0	2.68	2.68	1105	125.1	9.04	1
IPI00747787.2	Condensin-2 complex subunit D3	0.1228	5	2	15	18	246800000				215300000				260000000	0.961	1		5	7	5	5	7	6	0.036	0.0674	0.0427	0	0	0	0	1498	168.8	7.5	1
IPI00760588.2	Isoform 5 of Double-stranded RNA-specific adenosine deaminase	0.1858	6	2	14	21	714900000				378100000	1.011	1		269600000				7	9	3	8	10	3	0.0827	0.13	0.0462	0	2.89	3.13	6.02	931	103.6	8.66	1
IPI00760881.2	Isoform 1 of Sodium-coupled monocarboxylate transporter 2	0.0566	1	1	3	6	3805000				184300000	0.85	1		199700000				1	3	2	1	3	2	0.0194	0.0566	0.0388	0	0	0	0	618	67.6	8.1	1
IPI00783302.1	Isoform 1 of Pentatricopeptide repeat-containing protein 3, mitochondrial	0.1045	2	1	6	8	25890000				21900000	0.585	1		184700000				1	3	3	2	3	3	0.0218	0.0595	0.0406	0	0	0	0	689	78.5	6.42	1
IPI00783781.2	Nuclear pore complex protein Nup205	0.0716	1	1	13	16	446200000				43050000	1.121	1		278500000				6	3	7	6	3	7	0.0388	0.0174	0.0388	0	0	0	0	2012	227.8	6.19	1
IPI00784704.2	Isoform 2 of Fanconi anemia group I protein	0.0805	5	1	10	15	63150000				142700000				14610000	0.974	1		3	8	2	4	8	3	0.0355	0.0695	0.0245	0	0	0	0	1267	142.3	6.81	1
IPI00788836.1	Uncharacterized protein	0.1218	4	1	5	34	17290000				23230000	1.082	1		74420000				3	2	3	9	14	11	0.0756	0.0498	0.0683	0	2.5	0	2.5	542	57.6	8.95	1
IPI00788914.1	Uncharacterized protein	0.1902	48	1	6	11	283800000				177900000	1.059	1		136800000				3	3	4	3	4	4	0.1033	0.0978	0.1386	0	0	0	0	368	41.2	6.62	1
IPI00789251.2	Uncharacterized protein	0.0635	4	1	5	16	301400000				19750000				194100000	1.036	1		2	2	5	7	2	7	0.0166	0.0287	0.0635	0	0	0	0	661	75.9	6.58	1
IPI00791325.2	Pumilio domain-containing protein KIAA0020	0.2191	1	1	14	24	238100000				205100000				81890000	0.719	1		6	5	6	9	6	9	0.0941	0.0957	0.0895	0	0	0	0	648	73.5	9.64	1
IPI00796887.1	Zinc finger protein 169	0.2289	2	1	14	31	1121000000				214300000	1.147	1		21020000000				7	8	4	10	9	12	0.1443	0.126	0.0746	1.64	0	0	1.64	603	68.4	9.13	1
IPI00797234.1	Uncharacterized protein	0.0984	3	1	3	6	31320000				144100000	0.17	1		62630000				2	2	1	2	2	2	0.0571	0.0571	0.0413	0	0	0	0	315	35	9.36	1
IPI00798302.2	cDNA FLJ59405, highly similar to Eukaryotic translation initiation factor 4B	0.2168	5	1	9	10	139400000				1567000000	0.964	1		10080000				4	3	3	4	3	3	0.0909	0.0664	0.0822	0	0	0	0	572	64.8	6.13	1
IPI00828098.2	protein ALO17 isoform 1	0.0978	3	1	42	79	723100000				959700000				383400000	1.032	1		18	19	17	31	22	26	0.0468	0.0472	0.0371	2.58	1.93	4.05	8.56	5256	596.1	6.43	1
IPI00853547.1	Isoform 3 of Glucose-6-phosphate 1-dehydrogenase	0.1339	6	3	7	13	92320000				8851000				255800000	1.278	2	82.4	3	1	5	6	1	6	0.0661	0.0312	0.0844	3.91	0	0	3.91	545	62.4	8.05	1
IPI00879002.1	Uncharacterized protein	0.1006	2	1	5	6	0				1799000000				37100000	1.003	1		1	3	1	1	4	1	0.0204	0.0645	0.0157	0	0	0	0	636	73.5	5.54	1
IPI00894178.1	cDNA FLJ38868 fis, clone MESAN2013211, highly similar to Protein FAM98A	0.1685	5	1	4	15	991600000				131500000	1.116	1		0				2	3	1	2	10	3	0.0899	0.1348	0.0562	0	0	0	0	356	37.2	9.96	1
IPI00908568.1	replication factor C subunit 5 isoform 3	0.149	4	1	3	4	327000000				251500000				74950000	0.869	1		1	1	2	1	1	2	0.0588	0.0588	0.0902	0	0	2.47	2.47	255	28.8	6.55	1
IPI00909500.2	ubiquitin-like modifier-activating enzyme ATG7 isoform c	0.1059	7	1	5	6	93860000				0				6711000	0.711	1		3	2	1	3	2	1	0.0722	0.0337	0.0241	0	2.75	3.03	5.78	623	68.6	6.48	1
IPI00909914.3	cDNA FLJ50884, highly similar to Beta-hexosaminidase alpha chain	0.1163	2	1	3	4	362300000				67950000	0.842	1		0				1	2		1	3		0.0465	0.0698		0	2.08		2.08	301	34.6	4.82	1
IPI00926673.2	Interferon-related developmental regulator 2	0.1542	3	1	6	9	109400000				247200000				81020000	1.552	1		3	2	3	3	3	3	0.0534	0.0711	0.0771	0	0	2.17	2.17	506	54.8	7.94	1
IPI00940152.1	ataxin-10 isoform 2	0.1095	3	1	3	3	32710000				0				7993000	1.712	1		1		2	1		2	0.0243		0.0852	0		0	0	411	46.3	5.08	1
IPI00954192.1	Isoform 2 of Chromodomain-helicase-DNA-binding protein 1	0.1685	2	1	26	53	1866000000				1431000000				686800000	0.929	1		12	11	10	15	18	20	0.0802	0.0813	0.0667	0	0	0	0	1709	196.5	7.14	1
IPI00965680.1	Uncharacterized protein	0.1138	4	1	9	16	153500000				70580000				32420000	1.163	1		5	4	3	5	8	3	0.0693	0.0437	0.0294	0	0	1.84	1.84	1327	148	6.3	1
IPI00968090.1	21 kDa protein	0.1082	1	1	1	3	7213000				9627000	0.919	1		10090000				1	1	1	1	1	1	0.1082	0.1082	0.1082	0	0	0	0	194	20.7	4.44	1
IPI00974544.1	Isoform SV of 14-3-3 protein epsilon	0.2918	4	1	8	12	288700000				27050000				157500000	1.523	1		2	3	4	2	5	5	0.0558	0.103	0.176	0	0	1.75	1.75	233	26.5	4.87	1
IPI00981271.2	Uncharacterized protein	0.1669	4	1	11	12	22910000				96460000				177200000	4.238	1		3	4	4	3	5	4	0.0448	0.0473	0.0785	0	0	2.19	2.19	803	88.6	5.86	1
IPI00984807.1	25 kDa protein	0.1652	3	1	4	5	18050000				56520000	5.016	1		315700000				2	2	1	2	2	1	0.113	0.113	0.0609	0	0	0	0	230	25.1	8.16	1
IPI01012012.1	61 kDa protein	0.2158	4	1	11	20	688800000				736100000	0.919	1		268200000				7	4	4	9	6	5	0.1332	0.0807	0.0901	0	1.73	0	1.73	533	60.8	7.65	1
IPI01015425.1	Uncharacterized protein	0.0683	4	1	3	7	643500000				31810000				23170000	0.216	1		2	2	2	2	3	2	0.0478	0.0461	0.0461	0	0	1.82	1.82	586	67.3	8.88	1
IPI01015575.1	YME1-like 1	0.1162	5	1	7	11	62710000				2036000000				15050000	1.366	1		1	5	1	1	9	1	0.0189	0.0703	0.027	0	0	0	0	740	82.6	8.88	1
IPI01015888.1	cDNA, FLJ78845, highly similar to Medium-chain specific acyl-CoA dehydrogenase, mitochondrial	0.1299	6	2	5	7	33430000				141200000	1.835	1		27430000				2	3	2	2	3	2	0.0649	0.0857	0.0597	0	0	0	0	385	42.4	6.43	1
IPI01021193.1	Uncharacterized protein	0.3522	6	1	7	12	17380000				58380000	0.951	1		10210000				4	3	2	6	4	2	0.1384	0.2075	0.0881	0	0	0	0	159	18.1	11.84	1
IPI00010248.3	Isoform 1 of Maspardin	0.2273	2	1	5	6	0				103200000				42260000	0.915	1			2	3		2	4		0.1461	0.0812		0	0	0	308	34.9	6.28	1
IPI00385686.1	Ig gamma lambda chain V-II region DOT	0.0721	1	1	1	2	0				474600000	0.984	1		507800000					1	1		1	1		0.0721	0.0721		0	0	0	111	11.8	4.78	1
IPI00411677.3	Isoform 4 of AP-3 complex subunit delta-1	0.0979	3	1	10	12	0				92310000				443800000	0.692	1			6	5		6	6		0.0548	0.0548		0	0	0	1021	114.6	7.99	1
IPI00465436.4	Catalase	0.0835	1	1	4	6	0				122100000				119700000	0.675	1			1	4		1	5		0.0209	0.0835		0	0	0	527	59.7	7.39	1
IPI00641582.1	BAG family molecular chaperone regulator 3	0.1165	2	1	4	6	0				91500000				34630000	0.742	1			3	2		3	3		0.0887	0.0574		0	0	0	575	61.6	6.95	1
IPI00783625.2	Isoform 1 of Serpin B5	0.1173	3	1	3	4	0				4144000	0.528	1		47750000					2	1		3	1		0.0693	0.048		2.04	1.79	3.83	375	42.1	6.05	1
IPI00786906.1	Isoform 3 of BRCA2 and CDKN1A-interacting protein	0.1815	5	1	3	4	0				99280000				76900000	1.179	1			2	2		2	2		0.1027	0.1336		0	0	0	292	33.4	4.55	1
IPI00927202.1	Transporter	0.156	5	1	1	1	0				9864000	0.811	1		0					1			1			0.156			0		0	109	12.1	8.43	1
IPI00927696.1	Uncharacterized protein	0.3496	4	1	3	3	0				502900000				17070000	0.541	1			1	2		1	2		0.1463	0.2033		0	2.44	2.44	123	13.4	4.56	1
IPI00000211.1	Hydroxycarboxylic acid receptor 1	0.1734	1	1	6	19	133100000				403700000				343200000				3	4	3	7	7	5	0.0665	0.1329	0.0809	0	0	0	0	346	39.3	8.84	0
IPI00001869.3	Pappalysin-1	0.0627	2	1	7	10	66760000				27750000				46720000				4	1	3	6	1	3	0.0369	0.0104	0.0191	0	0	0	0	1627	180.9	6.18	0
IPI00002184.1	5-hydroxytryptamine receptor 1B	0.1231	1	1	4	6	23200000				0				34580000				2		2	4		2	0.0513		0.0718	0		0	0	390	43.5	8.69	0
IPI00002355.1	Calcineurin-binding protein cabin-1	0.1153	2	1	21	31	254700000				747700000				488000000				7	6	11	10	6	15	0.0342	0.0266	0.0748	0	0	0	0	2220	246.2	6.02	0
IPI00002459.4	Uncharacterized protein	0.1949	7	1	11	16	236600000				118300000				455300000				6	4	3	7	5	4	0.096	0.0765	0.0615	1.93	0	0	1.93	667	75.2	5.67	0
IPI00003590.2	Isoform 1 of Sulfhydryl oxidase 1	0.0991	2	1	5	19	6285000000				5354000000				5401000000				2	3	2	6	7	6	0.0375	0.0562	0.0455	1.8	5.34	0	7.14	747	82.5	8.92	0
IPI00004569.2	Isoform MZF1A of Myeloid zinc finger 1	0.188	3	1	11	18	636000000				134700000				169200000				4	5	3	7	6	5	0.0654	0.094	0.0613	0	0	0	0	734	82	8.19	0
IPI00006073.1	Isoform Long of Tumor necrosis factor receptor superfamily member 8	0.0807	1	1	2	6	564200000				127000000				626400000				2	1	2	2	2	2	0.0807	0.0471	0.0807	0	0	0	0	595	63.7	5.62	0
IPI00006644.4	Isoform 2 of Plexin-B1	0.041	3	1	6	12	52540000				54140000				25130000				5	2	1	6	5	1	0.0359	0.021	0.0056	0	0	0	0	1952	214.3	5.78	0
IPI00006726.2	Melanoma-associated antigen B2	0.2226	1	1	7	10	410400000				73220000				51320000				5	3	1	5	4	1	0.1191	0.1348	0.0408	0	0	0	0	319	35.3	8.76	0
IPI00007058.1	Coronin-1B	0.0941	3	1	5	5	35280000				2523000				33140000				2	2	1	2	2	1	0.0348	0.047	0.0164	0	0	0	0	489	54.2	5.88	0
IPI00007798.1	Thyrotropin-releasing hormone-degrading ectoenzyme	0.1006	1	1	9	13	347000000				110400000				105700000				6	3	3	7	3	3	0.083	0.0264	0.0293	0	0	0	0	1024	116.9	6.99	0
IPI00008231.2	Uncharacterized protein	0.1053	3	1	14	23	149900000				123100000				555600000				4	7	6	8	9	6	0.0398	0.0597	0.0597	0	0	0	0	1406	156.5	5.44	0
IPI00008727.1	ATP synthase lipid-binding protein, mitochondrial	0.3521	7	1	2	8	0				31480000				34150000				1	2	2	1	2	5	0.2254	0.3521	0.3521	0	1.89	1.66	3.55	142	14.7	9.45	0
IPI00009439.1	Synaptotagmin-1	0.1303	3	1	5	7	77420000				98420000				263500000				2	2	2	2	2	3	0.0569	0.0474	0.0592	0	0	0	0	422	47.5	8.12	0
IPI00009727.1	Doublesex- and mab-3-related transcription factor 3	0.1208	1	1	5	7	558800000				42720000				81050000				2	1	2	3	1	3	0.036	0.0191	0.0657	0	0	0	0	472	51.2	7.31	0
IPI00009771.6	Lamin-B2	0.2839	1	1	17	24	1237000000				44760000				182200000				10	5	7	11	5	8	0.1677	0.0968	0.1194	0	0	0	0	620	69.9	5.59	0
IPI00012574.2	Isoform 2 of Sodium-dependent phosphate transport protein 3	0.1193	2	1	4	6	91020000				37180000				125800000				2	1	3	2	1	3	0.0688	0.0298	0.0963	0	0	0	0	436	47.3	8.4	0
IPI00013160.2	Isoform 1 of Eukaryotic translation initiation factor 2D	0.0565	3	1	3	4	42810000				0				130100000				1		2	1		3	0.0205		0.036	0		0	0	584	64.7	7.65	0
IPI00014149.3	Tetratricopeptide repeat protein 35	0.0471	1	1	2	4	10380000				0				41090000				1		1	1		3	0.0236		0.0236	0		0	0	297	34.8	6.57	0
IPI00015170.3	Putative uncharacterized protein (Fragment)	0.1136	1	1	3	3	0				124000000				0				1	1	1	1	1	1	0.0455	0.0606	0.0682	0	0	0	0	264	28.8	11.66	0
IPI00015799.2	Diacylglycerol O-acyltransferase 1	0.1004	3	1	5	24	278200000				222900000				205600000				4	2	3	11	8	5	0.0799	0.0594	0.0799	0	0	0	0	488	55.2	9.32	0
IPI00016007.2	Myosin-Vc	0.1435	1	1	27	40	358300000				498800000				474000000				11	10	11	13	14	13	0.0563	0.062	0.0775	0	0	1.73	1.73	1742	202.7	7.71	0
IPI00016801.1	Glutamate dehydrogenase 1, mitochondrial	0.1487	3	1	11	22	6319000000				3270000000				2990000000				7	5	5	11	6	5	0.0932	0.0932	0.1022	0	0	0	0	558	61.4	7.8	0
IPI00017746.2	BRCA1-associated RING domain protein 1	0.1364	1	1	7	46	1255000000				233700000				91430000				4	2	5	20	9	17	0.0734	0.0463	0.112	0	0	0	0	777	86.6	8.72	0
IPI00018434.1	Isoform 1 of Tumor susceptibility gene 101 protein	0.1077	3	1	4	6	18960000				105500000				100600000				1	2	3	1	2	3	0.0256	0.0615	0.0821	0	0	0	0	390	43.9	6.46	0
IPI00019359.4	Keratin, type I cytoskeletal 9	0.3483	2	4	21	30	1223000000				44200000				327900000				16	6	5	17	8	5	0.2777	0.1316	0.1605	1.83	5.65	3.76	11.24	623	62	5.24	0
IPI00020127.1	Replication protein A 70 kDa DNA-binding subunit	0.1299	1	1	7	10	195400000				125700000				12970000				2	5	1	4	5	1	0.0308	0.099	0.0227	0	2.52	2.94	5.46	616	68.1	7.21	0
IPI00020495.1	28S ribosomal protein S36, mitochondrial	0.2039	1	1	1	2	289500000				62240000				0				1	1		1	1		0.2039	0.2039		0	0		0	103	11.5	9.99	0
IPI00021304.1	Keratin, type II cytoskeletal 2 epidermal	0.3488	10	9	19	40	2830000000				1634000000				1848000000				11	13	11	14	15	11	0.2047	0.2899	0.2264	5.76	5.86	3.56	15.18	645	65.8	8	0
IPI00021685.1	Isoform 1 of ADP-ribosylation factor-like protein 6	0.3441	3	1	7	9	105800000				48890000				65250000				3	3	3	3	3	3	0.2204	0.1828	0.1989	0	2.11	2.19	4.3	186	21.1	8.54	0
IPI00022229.2	Apolipoprotein B-100	0.0603	3	2	29	40	1290000000				399100000				280800000				16	14	7	17	15	8	0.0324	0.0344	0.0186	0	0	0	0	4563	515.3	7.05	0
IPI00022648.2	Eukaryotic translation initiation factor 5	0.2251	2	1	8	13	97220000				213400000				170400000				3	5	4	3	5	5	0.0882	0.1578	0.1369	2.69	0	5.99	8.68	431	49.2	5.58	0
IPI00023073.1	DNA repair protein XRCC3	0.104	1	1	4	5	192700000				91160000				104800000				2	1	1	3	1	1	0.0347	0.0289	0.0405	0	0	0	0	346	37.8	8.48	0
IPI00023097.1	Isoform 5 of Protein polybromo-1	0.1176	12	2	18	20	486000000				0				1454000000				8	1	9	8	2	10	0.067	0.0051	0.0575	0	0	0	0	1582	182	6.84	0
IPI00024467.3	UDP-glucose:glycoprotein glucosyltransferase 2	0.0937	1	1	15	21	184100000				493300000				389900000				5	6	7	6	7	8	0.0363	0.0297	0.0455	0	0	0	0	1516	174.6	6.89	0
IPI00026697.2	Isoform 3 of Zinc finger MYM-type protein 6	0.1049	5	1	10	19	131900000				58140000				39610000				4	7	3	5	10	4	0.04	0.08	0.0279	0	0	0	0	1325	148	8.22	0
IPI00028328.1	Taste receptor type 2 member 7	0.1006	1	1	5	15	51020000000				68310000000				165600000				3	1	3	4	7	4	0.0912	0.0409	0.0755	0	0	0	0	318	36.5	9.61	0
IPI00028954.1	80 kDa MCM3-associated protein	0.0914	1	1	21	34	281600000				188500000				45640000				13	9	6	13	11	10	0.0576	0.0505	0.0354	0	0	0	0	1980	218.3	6.39	0
IPI00029140.7	Uncharacterized protein	0.0826	4	1	5	26	46020000				2450000				225300000				4	2	3	12	8	6	0.0606	0.0367	0.0587	0	0	0	0	545	62	9.01	0
IPI00029739.5	Isoform 1 of Complement factor H	0.078	1	1	8	20	228900000				48140000				52160000				4	3	3	7	8	5	0.0422	0.0357	0.0374	0	0	0	0	1231	139	6.61	0
IPI00030572.5	Isoform 1 of Trinucleotide repeat-containing gene 6C protein	0.0379	2	1	7	15	77190000				535400000				13610000				3	6	1	8	6	1	0.0172	0.0379	0.0041	0	0	0	0	1690	175.9	6.96	0
IPI00031050.1	Sodium-dependent phosphate transport protein 2A	0.0485	1	1	3	3	619000000				50260000				76630000				1	1	1	1	1	1	0.0188	0.0172	0.0125	0	0	0	0	639	68.9	8.69	0
IPI00031107.1	Isoform 2 of Hydroxysteroid dehydrogenase-like protein 2	0.087	2	1	2	2	14730000				0				961700000				1		1	1		1	0.0522		0.0348	2.99		0	2.99	345	37.3	6.1	0
IPI00031127.1	Protein YIPF4	0.0533	1	1	1	62	270500000				100000000000				18740000				1	1	1	19	27	16	0.0533	0.0533	0.0533	1.69	1.66	0	3.35	244	27.1	4.65	0
IPI00031558.3	Isoform 1 of ADP-ribose pyrophosphatase, mitochondrial	0.1629	3	1	5	5	135600000				37570000				25410000				2	2	1	2	2	1	0.06	0.0743	0.0286	0	1.83	0	1.83	350	39.1	8.22	0
IPI00031765.1	Isoform 2 of Protocadherin gamma-C4	0.0586	2	1	4	6	864800000				45180000				8733000				3	1	1	3	1	2	0.0517	0.0069	0.0218	0	0	0	0	871	94.4	5.12	0
IPI00031836.3	Developmentally-regulated GTP-binding protein 1	0.1281	1	1	5	7	56720000				150700000				78550000				2	4	1	2	4	1	0.0763	0.1035	0.0381	0	0	0	0	367	40.5	8.9	0
IPI00032003.1	Emerin	0.1575	2	1	3	5	143000000				44550000				28940000				2	1	1	3	1	1	0.0866	0.0472	0.0709	0	0	0	0	254	29	5.5	0
IPI00033600.1	Isoform 1 of Protein phosphatase 1 regulatory subunit 7	0.3028	9	1	7	7	317900000				74770000				0				5	2		5	2		0.2361	0.0667		2.02	0		2.02	360	41.5	4.91	0
IPI00043526.5	cDNA FLJ55603	0.2521	2	1	17	26	579900000				1471000000				534200000				8	6	9	9	6	11	0.1211	0.1141	0.1451	0	0	0	0	710	80.6	9.41	0
IPI00063877.3	RPE-spondin	0.0985	1	1	4	9	350900000				301000000				276900000				2	3	2	3	3	3	0.0492	0.0909	0.0909	0	0	0	0	264	29.6	7.5	0
IPI00065554.4	RNA-binding protein EWS isoform 4	0.18	8	1	11	21	777500000				530900000				73100000				8	1	3	14	1	6	0.13	0.02	0.0517	0	0	0	0	600	62.5	9.39	0
IPI00068506.1	ATP-binding cassette sub-family F member 2 isoform b	0.1877	2	1	11	17	389500000				6808000				100200000				8	1	4	9	1	7	0.1388	0.0158	0.0678	0	0	0	0	634	72.4	7.49	0
IPI00077853.7	Isoform 1 of Oxysterol-binding protein-related protein 9	0.0516	9	1	4	6	260900000				230400000				465600000				2	1	2	3	1	2	0.0258	0.0149	0.0258	0	0	0	0	736	83.1	6.18	0
IPI00101734.5	Protein FAM105B	0.2131	1	1	8	12	352400000				75700000				90500000				5	3	3	6	3	3	0.1364	0.0824	0.0881	0	0	0	0	352	40.2	5.47	0
IPI00101969.9	Isoform 1 of Rho GTPase-activating protein 23	0.2669	3	1	26	97	2972000000				682400000				521300000				11	9	12	38	27	32	0.1482	0.1207	0.1294	5.04	4.33	13.67	23.04	1491	162.1	9.19	0
IPI00102864.3	Hexokinase-2	0.1429	1	1	12	16	254800000				255900000				284000000				3	7	6	3	7	6	0.0447	0.0829	0.084	0	0	0	0	917	102.3	6.05	0
IPI00103733.1	Thymidylate synthase	0.1696	3	1	4	14	71000000				543900000				1693000000				3	1	2	4	4	6	0.1696	0.0609	0.0913	0	0	0	0	230	26.1	7.81	0
IPI00103853.7	Isoform 1 of Putative ribosome-binding factor A, mitochondrial	0.2449	1	1	8	14	1856000000				103800000				0				6	3		11	3		0.1545	0.137		0	1.77		1.77	343	38.3	7.85	0
IPI00152143.4	Zinc finger protein 519	0.1704	1	1	8	11	104500000				1751000000				1429000000				1	4	4	2	4	5	0.0167	0.1296	0.1056	0	0	0	0	540	63	9.36	0
IPI00152899.1	Isoform 1 of Voltage-dependent T-type calcium channel subunit alpha-1I	0.0783	6	1	18	21	334900000				347700000				129100000				7	8	5	7	9	5	0.0409	0.0319	0.0211	0	0	0	0	2223	244.9	6.54	0
IPI00157513.3	Isoform 3 of ADAMTS-like protein 1	0.1107	5	1	17	24	209300000				130700000				125300000				10	6	7	11	6	7	0.0755	0.0375	0.0431	0	0	0	0	1762	193.3	7.8	0
IPI00163403.7	Isoform 1 of SH3KBP1-binding protein 1	0.1358	2	1	6	9	159300000				30010000				4220000				3	1	3	5	1	3	0.0778	0.0113	0.075	0	0	0	0	707	76.3	8.28	0
IPI00165519.1	cDNA FLJ14855 fis, clone PLACE1000979, moderately similar to ZINC FINGER PROTEIN 135	0.2097	2	1	8	23	729500000				733800000				568600000				6	2	5	10	5	8	0.1523	0.053	0.1545	0	0	0	0	453	51.7	8.82	0
IPI00168770.1	FLJ00328 protein (Fragment)	0.2227	1	1	4	4	64160000				790500000				0				2	2		2	2		0.1387	0.1387		0	0		0	238	25.2	9.23	0
IPI00171386.3	Isoform 2 of Chondroitin sulfate N-acetylgalactosaminyltransferase 1	0.1891	1	1	3	3	235100000				143000000				0				1	1	1	1	1	1	0.0509	0.0473	0.0909	0	0	0	0	275	31.9	8.34	0
IPI00171550.2	Isoform 1 of Cytosolic carboxypeptidase-like protein 5	0.0722	3	1	6	6	28360000				37590000				1931000000				3	2	1	3	2	1	0.0372	0.0214	0.0158	0	0	0	0	886	97.5	9.17	0
IPI00174978.4	Isoform 1 of Uncharacterized protein C1orf141	0.255	1	1	8	13	93540000				72150000				302300000				1	4	5	1	6	6	0.025	0.14	0.17	0	1.74	0	1.74	400	46.1	9.69	0
IPI00176450.1	Seven transmembrane helix receptor	0.1071	1	1	1	1	5208000000				0				0				1			1			0.1071			0			0	280	31.5	8.57	0
IPI00176829.2	Isoform 1 of Ras association domain-containing protein 3	0.2269	2	1	3	13	1455000000				1457000000				730000000				3	1	2	5	3	5	0.2269	0.1303	0.1849	2.11	0	0	2.11	238	27.5	7.44	0
IPI00180267.1	Conserved hypothetical protein	0.2132	2	1	4	6	334900000				367600000				0				3	2	1	3	2	1	0.1628	0.0891	0.0388	0	0	0	0	258	28.1	9.89	0
IPI00183572.4	Isoform 2 of Dedicator of cytokinesis protein 7	0.1231	6	1	20	25	78310000				140200000				171400000				8	8	7	8	8	9	0.046	0.0606	0.0503	2.31	4	1.68	7.99	2129	241.3	6.83	0
IPI00186826.1	Uncharacterized protein	0.169	2	1	13	16	19350000				435900000				32680000				4	5	4	4	6	6	0.0791	0.0599	0.0417	0	0	0	0	935	102.5	7.03	0
IPI00216230.3	Lamina-associated polypeptide 2, isoform alpha	0.2003	3	1	10	12	125000000				88510000				29610000				5	4	3	5	4	3	0.1081	0.0706	0.072	0	0	0	0	694	75.4	7.66	0
IPI00216402.3	Histone H3.1t	0.4118	8	1	9	13	108200000				99200000				283700000				4	4	3	5	5	3	0.2353	0.2721	0.2059	0	0	0	0	136	15.5	11.12	0
IPI00216520.1	Isoform A of Arfaptin-1	0.2287	2	1	5	6	117800000				55950000				0				1	4		1	5		0.0587	0.1701		0	0		0	341	38.6	6.55	0
IPI00217709.1	Isoform Beta-1 of DNA topoisomerase 2-beta	0.0993	3	1	16	17	132100000				132100000				257300000				5	4	7	5	4	8	0.0265	0.0253	0.0574	0	0	0	0	1621	182.5	8.06	0
IPI00218207.2	Isoform 2 of Spectrin beta chain, brain 2	0.1433	2	1	29	45	977200000				508900000				820600000				9	16	13	9	19	17	0.0507	0.0871	0.0693	3.26	0	0	3.26	2365	268.1	6.11	0
IPI00218540.4	Isoform C of Collagen alpha-1(XI) chain	0.1307	4	1	20	35	3481000000				113300000				1860000000				11	9	5	14	13	8	0.064	0.077	0.0272	0	0	0	0	1767	176.5	5.38	0
IPI00218597.6	Isoform A of Endothelin-converting enzyme 2	0.0917	4	1	6	7	85520000				118800000				124800000				1	3	3	1	3	3	0.0091	0.0396	0.0691	0	0	0	0	883	99.7	5.1	0
IPI00219759.1	Isoform 2 of Zinc finger protein 207	0.0562	4	1	2	5	65400000				119700000				104000000				1	2	1	1	3	1	0.0281	0.0562	0.0281	0	0	0	0	463	49.7	9.1	0
IPI00220311.1	Isoform 5 of Merlin	0.1821	5	1	12	16	262100000				25110000				1848000000				4	2	6	5	2	9	0.0674	0.051	0.0965	0	0	0	0	549	64.1	8.16	0
IPI00220327.4	Keratin, type II cytoskeletal 1	0.441	9	12	25	54	4116000000				2910000000				2220000000				17	15	10	19	21	14	0.25	0.2981	0.2205	14.77	10.76	11.07	36.6	644	66	8.12	0
IPI00220373.5	Insulin-degrading enzyme	0.1217	1	1	9	15	76640000				66010000				71430000				3	4	4	3	7	5	0.0324	0.0461	0.0658	0	0	0	0	1019	117.9	6.61	0
IPI00220460.1	Isoform 2 of Oxysterol-binding protein-related protein 2	0.047	2	1	3	12	1425000000				649400000				1229000000				2	3	2	4	5	3	0.047	0.047	0.047	0	0	2.13	2.13	468	53.9	6.62	0
IPI00240784.5	Isoform 2 of Neuroligin-4, Y-linked	0.0602	3	1	3	29	2181000				2669000				13690000				1	2	2	9	11	9	0.0293	0.0432	0.0463	0	0	0	0	648	72.8	6.43	0
IPI00290456.4	Intercellular adhesion molecule 5	0.1396	1	1	12	20	130800000				213500000				187400000				6	3	7	9	3	8	0.0812	0.039	0.0768	0	0	0	0	924	97.1	5.95	0
IPI00291702.2	Isoform 1 of LIM domain kinase 1	0.1422	3	1	10	13	66030000				280600000				266900000				4	2	5	4	2	7	0.0464	0.0263	0.0896	0	0	0	0	647	72.5	6.98	0
IPI00292657.3	Prostaglandin reductase 1	0.1793	3	1	4	4	41170000				40140000				8139000				2	1	1	2	1	1	0.0912	0.0304	0.0578	0	0	3.32	3.32	329	35.8	8.29	0
IPI00293078.1	Probable ATP-dependent RNA helicase DDX27	0.2098	1	1	16	24	437900000				230700000				182100000				8	7	5	10	9	5	0.1043	0.1005	0.0817	0	1.9	0	1.9	796	89.8	9.28	0
IPI00294713.5	Isoform 1 of Mannan-binding lectin serine protease 2	0.0685	1	1	3	6	4633000000				58490000				3220000000				2	1	1	4	1	1	0.0466	0.0219	0.0219	0	0	0	0	686	75.7	5.63	0
IPI00297593.4	Isoform 1 of Ubiquitin carboxyl-terminal hydrolase 34	0.0688	5	1	22	30	141100000				294900000				309900000				8	9	7	10	11	9	0.0259	0.0274	0.0243	0	0	0	0	3546	404	5.82	0
IPI00298306.5	Serine-protein kinase ATM	0.0857	1	1	26	44	524500000				414600000				555200000				9	10	12	10	13	21	0.036	0.0334	0.0412	0	1.66	0	1.66	3056	350.5	6.81	0
IPI00298447.3	Probable methyltransferase TARBP1	0.0574	1	1	9	13	586200000				148700000				304300000				4	2	5	5	3	5	0.0271	0.0148	0.037	0	0	0	0	1621	181.6	7.05	0
IPI00298696.3	Isoform 2 of Treacle protein	0.1134	7	1	14	19	241000000				312000000				84030000				9	4	6	9	4	6	0.0822	0.039	0.0482	0	0	0	0	1411	144.2	9.04	0
IPI00298971.1	Vitronectin	0.1025	2	1	5	11	215700000				66520000				73980000				3	4	2	5	4	2	0.0669	0.0795	0.0439	2.78	2.43	2.67	7.88	478	54.3	5.8	0
IPI00300027.4	Sulfotransferase 1A2	0.2136	3	1	5	5	323300000				4731000				3696000000				3	1	1	3	1	1	0.1254	0.0542	0.0339	0	0	0	0	295	34.3	7.97	0
IPI00304895.7	Molybdenum cofactor sulfurase	0.0664	1	1	6	6	73370000				44430000				102900000				2	1	3	2	1	3	0.0203	0.0101	0.0439	0	0	0	0	888	98.1	6.7	0
IPI00304942.3	Isoform 1 of Dual specificity tyrosine-phosphorylation-regulated kinase 2	0.1547	2	1	7	9	435600000				282800000				272800000				4	3	1	5	3	1	0.0932	0.0582	0.0233	0	0	0	0	601	66.6	9.67	0
IPI00306718.3	Synaptonemal complex protein 2	0.119	1	1	17	35	513000000				457000000				143800000				8	9	8	12	10	13	0.0693	0.0627	0.0549	0	0	0	0	1530	175.5	8.85	0
IPI00307760.7	Zinc finger CCCH domain-containing protein 8	0.0997	1	1	3	5	6781000000				891600000				19750000				2	1	2	2	1	2	0.079	0.0206	0.0515	0	0	0	0	291	33.6	8.28	0
IPI00328170.9	Mannosyl-oligosaccharide glucosidase	0.0741	2	1	5	7	237700000				206500000				0				4	2		5	2		0.0526	0.0358		0	0		0	837	91.9	8.9	0
IPI00328254.10	Isoform 2 of PAB-dependent poly(A)-specific ribonuclease subunit 2	0.081	3	1	10	15	73330000				136100000				28400000				4	6	3	5	6	4	0.0367	0.0442	0.0284	0	0	0	0	1198	134.9	5.95	0
IPI00328703.1	Out at first protein homolog	0.1136	1	1	2	3	18170000				0				123700000				1		1	1		2	0.022		0.0916	0		0	0	273	30.7	6.84	0
IPI00328885.3	Uncharacterized protein	0.2087	2	1	52	107	826800000				518000000				385000000				25	21	16	39	29	39	0.1206	0.0974	0.0766	0	0	2.31	2.31	3708	383.6	5.99	0
IPI00329236.3	Protein kinase C delta type	0.1627	1	1	8	9	128400000				47670000				19120000				4	3	2	4	3	2	0.0932	0.071	0.034	0	0	0	0	676	77.5	7.75	0
IPI00334799.8	Isoform 3 of Ryanodine receptor 1	0.0829	3	1	36	60	12530000000				487900000				778500000				16	13	15	19	18	23	0.0435	0.0258	0.0433	0	0	0	0	5033	564.2	5.29	0
IPI00335509.3	Dihydropyrimidinase-related protein 5	0.195	4	2	6	36	304000000				3414000000				1217000000				4	1	4	13	13	10	0.1365	0.0585	0.1436	0	5.03	0	5.03	564	61.4	7.2	0
IPI00375339.2	Isoform 1 of Sodium/potassium-transporting ATPase subunit alpha-4	0.0777	2	1	8	163	66990000000				34120000000				849500000				4	6	2	43	66	54	0.0457	0.0632	0.0311	14.09	30.43	28.45	72.97	1029	114.1	6.64	0
IPI00382490.1	Ig heavy chain V-III region BUR	0.1597	1	1	2	5	106900000				128100000				105400000				2	1	1	3	1	1	0.1597	0.0924	0.0924	0	0	0	0	119	13	9.6	0
IPI00382495.1	Ig heavy chain V-III region ZAP	0.1379	1	1	1	3	100100000				67050000				0				1	1		2	1		0.1379	0.1379		0	0		0	116	12.6	8.51	0
IPI00382872.1	Facioscapulohumeral muscular dystrophy	0.1219	7	1	12	34	298200000				209700000				9334000				8	6	3	15	13	6	0.0914	0.0703	0.0457	0	0	0	0	853	89	11.87	0
IPI00383500.3	Isoform 2 of Fermitin family homolog 2	0.1374	4	1	8	10	76610000				99710000				6691000				5	1	3	5	1	4	0.109	0.019	0.0679	0	0	2.99	2.99	633	72.4	7.5	0
IPI00384217.1	Envelope glycoprotein	0.066	1	1	4	6	45840000				41370000				32080000				3	1	2	3	1	2	0.0484	0.0176	0.0308	0	0	0	0	682	77.1	8.69	0
IPI00385784.1	Protein-serine/threonine kinase (Fragment)	0.5941	1	1	4	38	5261000000				33210000				382800000				2	2	2	17	10	11	0.3366	0.2772	0.495	0	0	0	0	101	11.5	8.16	0
IPI00386208.1	Gastric-associated differentially-expressed protein YA61P	0.3824	1	1	4	6	27970000				168600000				278500000				2	2	2	2	2	2	0.1544	0.2279	0.2132	0	0	0	0	136	14.9	7.5	0
IPI00395473.7	Zinc finger protein 135	0.1322	5	1	7	21	139600000				1910000000				487400000				3	3	2	3	9	9	0.0547	0.0578	0.0426	0	0	0	0	658	75.2	8.15	0
IPI00396108.2	G-protein coupled receptor family C group 5 member C isoform a	0.1461	3	1	5	5	488400000				0				32230000				3		2	3		2	0.0885		0.0802	0		0	0	486	52.9	8.94	0
IPI00397474.2	Isoform 1 of Separin	0.0778	1	1	13	23	35170000000				22820000000				122700000				8	6	5	8	9	6	0.0415	0.0392	0.0316	0	1.76	0	1.76	2120	233	7.55	0
IPI00397801.4	Filaggrin-2	0.1046	1	2	16	25	563800000				495600000				96850000				4	7	8	4	11	10	0.0192	0.0355	0.0686	0	3.64	2.92	6.56	2391	247.9	8.31	0
IPI00397879.2	Uncharacterized protein C2orf71	0.1351	1	1	16	24	703700000				429500000				709900000				9	4	6	10	5	9	0.0885	0.0334	0.0443	1.88	0	1.62	3.5	1288	139.6	8.07	0
IPI00398625.5	Hornerin	0.0965	1	1	9	13	130900000				152400000				419100000				4	5	2	5	5	3	0.0467	0.0182	0.0453	0	2.65	0	2.65	2850	282.2	10.04	0
IPI00400849.2	Isoform 3 of Phosphatidylinositol-binding clathrin assembly protein	0.159	5	1	8	17	62720000				347900000				359800000				4	4	4	5	6	6	0.1033	0.0754	0.0705	2.13	0	0	2.13	610	66.4	8.81	0
IPI00400922.5	Protein RRP5 homolog	0.1422	2	1	23	40	4242000000				9467000000				8584000000				7	10	11	8	15	17	0.0556	0.0561	0.0722	0	0	2.19	2.19	1871	208.6	8.87	0
IPI00401451.1	HERV-R(b)_3p24.3 provirus ancestral Env polyprotein	0.0837	1	1	4	4	283900000				77300000				0				3	1		3	1		0.0681	0.0156		0	0		0	514	58.5	7.66	0
IPI00401759.4	early estrogen-induced gene 1 protein isoform b	0.0826	3	1	2	4	22220000				0				0				2			4			0.0826			0			0	242	25.9	6.73	0
IPI00412650.2	Isoform 1 of Supervillin	0.1305	3	1	30	55	1677000000				1956000000				254900000				17	11	10	21	19	15	0.0804	0.0447	0.0556	0	0	0	0	2214	247.6	6.98	0
IPI00412740.5	Isoform 1 of Mitogen-activated protein kinase kinase kinase 15	0.0396	3	1	6	9	34250000				46750000				17490000				2	2	3	2	4	3	0.0122	0.016	0.0274	0	0	0	0	1313	147.3	5.63	0
IPI00413293.6	cDNA FLJ56343, highly similar to Torsin A	0.2857	2	1	9	11	52660000				115700000				48830000				1	5	3	1	6	4	0.0165	0.1731	0.1154	0	0	0	0	364	40.8	7.99	0
IPI00418614.3	Zinc finger protein 497	0.2028	1	1	7	9	48080000				1328000000				214300000				2	3	3	2	4	3	0.0582	0.0823	0.0863	0	0	0	0	498	54.7	8.94	0
IPI00419237.3	Isoform 1 of Cytosol aminopeptidase	0.1291	3	1	5	5	33220000				0				20760000				2		3	2		3	0.0617		0.0674	0		0	0	519	56.1	7.93	0
IPI00430622.1	Spartin	0.0811	1	1	3	3	7793000				0				1197000000				1		2	1		2	0.018		0.0631	0		0	0	666	72.8	5.91	0
IPI00444016.1	Conserved hypothetical protein	0.1628	1	1	2	39	1455000				4829000				2499000				1	1	2	12	13	14	0.1318	0.1318	0.1628	0	0	0	0	129	14.4	5.08	0
IPI00446314.3	cDNA FLJ42258 fis, clone TKIDN2010934	0.2863	1	1	4	15	311100000				457700000				949600				3	2	3	8	3	4	0.2137	0.141	0.2137	0	0	0	0	234	24.9	10.23	0
IPI00455599.4	Heat shock protein 90Bb	0.2938	1	1	14	33	1646000000				1387000000				1221000000				9	8	6	12	12	9	0.237	0.1919	0.1445	0	8.39	7.84	16.23	422	49.1	5.15	0
IPI00456723.1	Isoform 5 of Ral GTPase-activating protein subunit alpha-1	0.0791	7	1	14	19	77460000				238100000				59680000				3	9	3	5	11	3	0.0212	0.0415	0.0217	2.05	0	1.98	4.03	2073	234	6.32	0
IPI00456958.3	Ovostatin homolog 2	0.0649	1	1	10	13	214200000				934100000				348100000				5	4	4	5	4	4	0.0265	0.0286	0.03	0	0	0	0	1432	161.1	5.27	0
IPI00465044.2	Protein RCC2	0.0958	1	1	6	8	100300000				77830000				46890000				3	3	1	4	3	1	0.0556	0.069	0.0153	0	0	0	0	522	56	8.78	0
IPI00472614.3	ERC protein 2	0.2738	1	1	26	32	1345000000				63410000				82530000				11	5	14	11	6	15	0.1212	0.0491	0.1567	0	0	2.06	2.06	957	110.5	6.99	0
IPI00477042.5	hypothetical protein LOC55086 isoform 2	0.0858	2	1	6	9	3181000				301700000				427900000				2	2	3	2	3	4	0.0251	0.0343	0.0449	0	0	0	0	758	86.5	8.28	0
IPI00479654.2	Immunoglobulin superfamily containing leucine-rich repeat protein 2	0.0658	2	1	3	4	387400000				54600000				150800000				1	1	1	1	1	2	0.0255	0.0242	0.0161	0	0	0	0	745	78.9	5.29	0
IPI00513796.3	Uncharacterized protein	0.0885	8	1	2	2	42420000				0				0				1	1		1	1		0.0393	0.0492		0	0		0	305	33.4	6.74	0
IPI00514141.2	La ribonucleoprotein domain family, member 5	0.1593	2	1	6	8	20300000				115100000				136500000				1	3	4	1	3	4	0.0295	0.1091	0.1209	0	1.76	0	1.76	339	36.6	9.99	0
IPI00549336.2	Isoform Beta-1D of Integrin beta-1	0.1149	5	1	9	12	403200000				214300000				17420000				5	3	3	5	4	3	0.0749	0.0424	0.0387	0	0	0	0	801	88.8	5.48	0
IPI00550385.3	Isoform 1 of Microtubule-actin cross-linking factor 1, isoforms 1/2/3/5	0.1295	2	1	84	114	1983000000				1141000000				2270000000				36	42	25	41	47	26	0.0596	0.0686	0.0398	0	3.89	0	3.89	7388	837.8	5.39	0
IPI00552956.2	Ankyrin repeat domain-containing protein 20A4	0.181	8	1	15	21	314400000				4211000000				136700000				6	6	6	6	7	8	0.0705	0.0802	0.0778	0	0	0	0	823	94.1	7.94	0
IPI00556230.1	CD40 antigen isoform 2 variant (Fragment)	0.1724	1	1	4	5	1669000000				0				124200000				3		1	4		1	0.1073		0.0651	0		0	0	261	28.1	10.3	0
IPI00607580.2	Isoform 2 of Multiple epidermal growth factor-like domains protein 8	0.0547	3	1	12	20	284500000				382800000				37760000				7	6	2	9	9	2	0.0295	0.0263	0.0119	0	0	0	0	2778	295.7	6.86	0
IPI00607777.2	kalirin isoform 1	0.0847	3	1	26	31	1023000000				148700000				203400000				10	7	11	11	7	13	0.0345	0.0261	0.0365	0	0	0	0	2986	340	6.07	0
IPI00640510.2	Uncharacterized protein	0.1474	21	1	9	15	107100000				14930000				658000000				7	3	2	9	3	3	0.1154	0.0417	0.0403	0	0	0	0	719	81.1	8.41	0
IPI00641912.1	NOGO-interacting mitochondrial protein	0.2045	1	1	7	11	25800000				204400000				44020000				1	4	3	1	7	3	0.0227	0.1061	0.096	0	0	0	0	396	43.7	9.88	0
IPI00642092.2	Isoform 1 of Rho guanine nucleotide exchange factor 19	0.1284	3	1	12	22	91350000				197500000				172700000				5	3	4	8	8	6	0.0549	0.0274	0.0586	0	0	0	0	802	89.1	7.53	0
IPI00644680.2	Zinc finger protein 469	0.105	1	1	39	59	751600000				238700000				1522000000				17	14	17	21	17	21	0.0553	0.0397	0.0482	0	0	0	0	3925	409.9	7.72	0
IPI00645992.2	Isoform 2 of Neutral ceramidase	0.0792	2	1	4	4	41290000				71230000				70490000				2	1	1	2	1	1	0.0443	0.0188	0.0161	0	0	0	0	745	81.7	7.77	0
IPI00646161.2	Uncharacterized protein	0.1429	3	1	7	7	92770000				214300000				3339000000				4	2	1	4	2	1	0.109	0.0508	0.0218	0	0	0	0	413	47	6.37	0
IPI00646625.1	Antigen peptide transporter 1	0.0483	2	1	4	5	0				0				35540000				1	1	3	1	1	3	0.0136	0.0136	0.0347	0	0	0	0	808	87.2	8.02	0
IPI00657884.5	Uncharacterized protein	0.1493	4	1	8	12	1126000000				27540000				21500000				6	2	2	8	2	2	0.106	0.0433	0.0299	0	0	0	0	670	78.1	5.94	0
IPI00736469.1	Isoform 2 of Kinesin light chain 3	0.1292	2	1	6	9	16490000				0				25760000000				2		4	2		7	0.0298		0.0994	0		0	0	503	55.2	6.49	0
IPI00739940.4	Isoform 1 of Protein furry homolog-like	0.0896	4	1	30	41	995800000				1338000000				866100000				13	11	11	17	12	12	0.0428	0.0302	0.0358	0	0	0	0	3013	339.4	5.58	0
IPI00742948.1	Villin 1, isoform CRA_a	0.1805	1	1	8	13	336300000				100900000				246700000				3	4	4	3	6	4	0.095	0.1116	0.133	0	0	0	0	421	46.5	8.19	0
IPI00744711.2	Polyribonucleotide nucleotidyltransferase 1, mitochondrial	0.1596	3	1	14	21	276300000				111600000				114300000				9	4	3	11	4	6	0.1137	0.0511	0.0447	1.6	0	0	1.6	783	85.9	7.77	0
IPI00744811.2	Low-density lipoprotein receptor-related protein 5	0.0632	1	1	10	16	360100000				152500000				205600000				5	6	2	5	8	3	0.0297	0.0421	0.0173	0	0	0	0	1615	179	5.34	0
IPI00745512.2	Conserved hypothetical protein	0.4308	1	1	6	49	6014000				59470000				1066000000				1	3	5	13	16	20	0.0667	0.2359	0.4308	0	1.78	3.49	5.27	195	20.2	11.85	0
IPI00745746.2	Isoform 1 of PDZ domain-containing protein 2	0.1201	3	1	29	36	1470000000				54670000				286700000				18	5	10	18	7	11	0.0743	0.018	0.0444	1.77	0	1.7	3.47	2839	301.5	7.43	0
IPI00746891.1	Similar to FEZ family zinc finger 1	0.1533	1	1	2	12	791600000				2336000				0				1	2	1	5	5	2	0.1095	0.1533	0.1095	0	0	0	0	137	14.1	9.06	0
IPI00749011.1	1-acyl-sn-glycerol-3-phosphate acyltransferase gamma	0.162	1	1	7	8	107000000				221600000				192600000				1	4	3	1	4	3	0.0216	0.1102	0.0907	0	0	0	0	463	52.2	8.65	0
IPI00760714.1	Isoform 2 of WD repeat and FYVE domain-containing protein 3	0.0556	2	1	14	25	844200000				398400000				369400000				7	9	4	11	10	4	0.0282	0.0351	0.016	1.6	0	2.33	3.93	3509	393.1	6.79	0
IPI00783879.2	Isoform 1 of Zinc finger protein 40	0.0655	1	1	15	110	430700000				248800000				1237000000				6	8	6	37	32	41	0.032	0.0438	0.032	11.83	23.92	30.28	66.03	2718	296.7	7.84	0
IPI00784092.3	Uncharacterized protein	0.096	1	1	6	8	134300000				112100000				15260000				4	1	3	4	1	3	0.0747	0.0173	0.0533	2.43	0	0	2.43	750	83	6.28	0
IPI00784614.1	septin-9 isoform a	0.1007	8	1	6	7	18520000				54250000				90760000				2	2	3	2	2	3	0.0444	0.0358	0.0546	3.25	0	0	3.25	586	65.4	8.97	0
IPI00789428.1	Isoform 2 of Methylcrotonoyl-CoA carboxylase beta chain, mitochondrial	0.12	3	1	7	21	54010000				203700000				15050000				4	2	3	8	8	5	0.0476	0.0362	0.0819	0	0	2.58	2.58	525	57.5	7.71	0
IPI00790205.1	Uncharacterized protein	0.2731	3	1	6	8	24070000				39910000				27030000				1	3	3	1	4	3	0.0925	0.1806	0.1145	0	0	0	0	227	25.6	8.87	0
IPI00790221.3	Isoform 1 of Coiled-coil domain-containing protein 39	0.1668	2	1	13	21	701200000				691800000				361600000				5	4	6	9	4	8	0.0659	0.0648	0.0627	0	0	0	0	941	109.8	6.44	0
IPI00792971.2	Isoform 2 of Isocitrate dehydrogenase [NAD] subunit alpha, mitochondrial	0.1771	4	1	5	6	0				270100000				59660000				1	1	4	1	1	4	0.0417	0.0382	0.1597	0	0	3.65	3.65	288	31.4	6.24	0
IPI00793381.2	Uncharacterized protein	0.2127	4	1	8	14	114700000				20910000				51110000				2	6	4	3	7	4	0.0588	0.181	0.1244	2.84	3.25	3.23	9.32	442	51.9	6.74	0
IPI00794198.2	Uncharacterized protein	0.061	4	1	9	15	572100000				154400000				68530000				4	3	5	4	4	7	0.0352	0.0188	0.0415	0	0	0	0	1278	137.4	4.72	0
IPI00796624.2	Uncharacterized protein	0.153	5	1	7	8	215600000				0				49580000				2		5	2		6	0.0335		0.1342	0		0	0	477	53.3	7.12	0
IPI00796919.2	Beta-galactosidase	0.0841	4	1	6	9	84550000				28370000				79380000				2	2	3	3	2	4	0.0372	0.029	0.0483	0	0	0	0	725	81.8	7.94	0
IPI00797038.1	Isoform 1 of Phosphoenolpyruvate carboxykinase [GTP], mitochondrial	0.1172	3	1	6	8	94290000				39030000				48330000				3	3	2	3	3	2	0.0484	0.0688	0.0406	0	2.51	1.85	4.36	640	70.7	7.62	0
IPI00816201.1	Isoform 2 of Septin-7	0.1491	6	1	5	10	1362000000				601400000				678100000				3	2	2	4	4	2	0.0917	0.0757	0.0573	0	0	0	0	436	50.5	8.63	0
IPI00827942.3	Isoform 9 of Voltage-dependent L-type calcium channel subunit alpha-1C	0.1062	36	1	18	31	206600000				1090000000				679900000				5	9	9	7	11	13	0.0261	0.059	0.0495	0	0	1.84	1.84	2222	248.4	6.65	0
IPI00827985.2	cDNA FLJ55749, highly similar to Homo sapiens membrane-associated ring finger (C3HC4) 6 (MARCH6), mRNA	0.094	4	1	6	12	156700000				123400000				386400000				5	1	2	8	2	2	0.0847	0.0139	0.0255	0	0	0	0	862	97.1	6.24	0
IPI00844416.3	Isoform 2 of Fibronectin type III domain-containing protein 1	0.1365	2	1	21	54	280600000				145800000				238500000				9	7	10	22	10	22	0.0765	0.0573	0.0808	0	0	0	0	1831	198.6	9.26	0
IPI00847283.2	Isoform 3 of Mitogen-activated protein kinase kinase kinase 6	0.0891	3	1	11	17	497200000				142800000				66380000				7	3	3	9	3	5	0.0719	0.0352	0.0398	0	0	0	0	1280	141.6	7.18	0
IPI00869301.1	Isoform 2 of Kelch-like protein 24	0.1043	2	1	6	6	13370000				796500000				200100000				3	1	2	3	1	2	0.0447	0.0279	0.0466	0	0	0	0	537	61.4	6.16	0
IPI00871372.2	E3 ubiquitin-protein ligase HECTD1	0.0823	3	1	22	29	1578000000				707600000				1234000000				9	10	5	10	11	8	0.0314	0.0398	0.0241	0	0	0	0	2612	289.3	5.38	0
IPI00872303.1	rho GTPase-activating protein 9 isoform 2	0.1188	12	1	12	21	231000000				4441000000				812000000				7	4	4	7	7	7	0.0891	0.0547	0.0422	0	0	0	0	640	70.8	8.68	0
IPI00872398.2	Uncharacterized protein	0.0414	5	1	3	4	7695000				47770000				5535000				2	1	1	2	1	1	0.0321	0.0145	0.0093	3.11	0	0	3.11	967	108.8	5.71	0
IPI00872729.1	Isoform 2 of WD repeat-containing protein 44	0.0652	3	1	5	5	62030000				39510000				18300000				1	3	1	1	3	1	0.0122	0.0464	0.0188	0	0	0	0	905	100.3	5.45	0
IPI00873520.2	Conserved hypothetical protein	0.1747	1	1	11	29	6120000000				3281000000				2917000000				5	7	5	7	13	9	0.1048	0.1135	0.1004	0	0	0	0	458	53.1	9.42	0
IPI00873918.3	Uncharacterized protein	0.1061	3	1	5	6	532300000				170400000				121500000				3	2	1	3	2	1	0.0737	0.0324	0.0216	0	0	0	0	556	62.6	7.88	0
IPI00878685.2	Isoform 3 of Rho guanine nucleotide exchange factor 40	0.0594	4	1	8	15	252600000				40440000000				6622000000				4	1	5	6	2	7	0.0294	0.0047	0.0347	0	0	0	0	1498	162.7	6.47	0
IPI00883708.3	Polycystic kidney disease-associated protein	0.0569	7	1	20	42	274100000				809900000				108500000				9	9	9	15	15	12	0.0245	0.0264	0.0305	0	0	0	0	3638	391.9	6.9	0
IPI00889046.2	Isoform 1 of Ankyrin repeat domain-containing protein 36C	0.2289	4	1	28	45	335100000				315400000				83820000				14	14	7	17	19	9	0.1181	0.1147	0.0568	0	0	0	0	1778	199.6	7.83	0
IPI00892961.1	Uncharacterized protein	0.133	4	1	2	4	1567000000				849300000				284300000				1	2	1	1	2	1	0.078	0.133	0.055	0	0	0	0	218	24.6	8.95	0
IPI00893078.2	Uncharacterized protein	0.0734	1	1	10	16	2471000000				30110000000				147100000				6	2	6	7	2	7	0.046	0.0129	0.0455	0	0	0	0	1934	221.6	7.03	0
IPI00894104.2	cDNA FLJ39381 fis, clone PERIC2000422, highly similar to HEAT repeat-containing protein 2	0.0466	4	1	2	43	5911000				5869000				5028000				1	2	1	12	21	10	0.0183	0.0466	0.0183	0	2.17	0	2.17	601	66.5	5.85	0
IPI00894549.1	Protein	0.3958	1	1	2	4	535500000				196300000				115300000				1	1	2	1	1	2	0.3333	0.3333	0.3958	0	0	0	0	48	5.4	5.87	0
IPI00902696.1	cDNA FLJ16059 fis, clone TESTI2029252, highly similar to Homo sapiens transmembrane channel-like 5 (TMC5), mRNA	0.0786	6	1	6	15	1085000000				10820000				205300000				3	1	5	4	1	10	0.0686	0.0157	0.0786	0	0	0	0	700	81.3	9.16	0
IPI00910227.3	cDNA FLJ53029, highly similar to Homo sapiens solute carrier family 25 (mitochondrial carrier), member 18 (SLC25A18), mRNA	0.4691	4	1	6	11	424200000				17310000				91580000				2	2	4	5	2	4	0.179	0.1975	0.321	1.62	0	0	1.62	162	18.6	9.64	0
IPI00910331.2	cDNA FLJ60386, moderately similar to Signal-induced proliferation-associated protein 1	0.0819	3	1	5	8	154700000				128500000				118600000				1	3	4	1	3	4	0.0202	0.0585	0.066	0	0	0	0	940	101.8	6.48	0
IPI00914038.1	Isoform 2 of Low-density lipoprotein receptor-related protein 12	0.1024	2	1	8	10	32290000				34610000				343900000				2	5	2	2	6	2	0.0226	0.0762	0.0286	0	0	0	0	840	93.1	5.24	0
IPI00914524.2	cDNA: FLJ23161 fis, clone LNG09730	0.2327	1	1	10	18	427100000				33520000				384400000				6	2	5	9	2	7	0.1939	0.0748	0.0997	0	0	0	0	361	41.9	6.8	0
IPI00914847.2	nebulin isoform 1	0.1527	4	1	93	142	560000000				806300000				1469000000				34	45	37	39	56	47	0.0592	0.0791	0.0612	2.1	1.94	2.03	6.07	8525	986	9	0
IPI00922510.1	cDNA FLJ50165, moderately similar to Sorbitol dehydrogenase	0.17	2	1	1	1	7934000				0				0				1			1			0.17			0			0	100	10.8	9.16	0
IPI00922567.2	Uncharacterized protein	0.2008	1	1	4	4	19970000				41650000				4422000				1	2	1	1	2	1	0.0265	0.0947	0.1061	0	0	0	0	264	29.5	4.77	0
IPI00925578.1	Isoform 4 of Dynein heavy chain 14, axonemal	0.1223	2	1	46	56	1099000000				686600000				652200000				20	16	14	24	16	16	0.0547	0.0383	0.0447	2.06	0	0	2.06	4515	518.2	7.06	0
IPI00926109.1	Isoform 2 of Putative ATP-dependent RNA helicase DHX30	0.1277	3	1	9	12	93630000				104000000				19510000				4	3	3	5	3	4	0.054	0.0491	0.0327	0	0	1.65	1.65	1222	136	8.6	0
IPI00926171.1	Isoform 5 of Prominin-1	0.1248	7	1	8	20	122700000				33970000				12460000				4	4	2	9	5	6	0.0727	0.0848	0.0436	0	0	0	0	825	92.7	7.36	0
IPI00927793.1	Uncharacterized protein	0.3523	1	1	2	23	112900000				5140000				13240000000				2	1	1	8	9	6	0.3523	0.1705	0.1705	0	0	0	0	88	9.9	4.78	0
IPI00939370.1	CKAP4 protein (Fragment)	0.1167	4	1	7	23	81770000				363100000				404000000				5	4	3	8	6	9	0.1	0.0867	0.0683	5.06	2.84	5.77	13.67	600	67.8	9.31	0
IPI00940872.2	Titin, isoform CRA_a	0.1081	12	1	331	499	7676000000				1392000000				1341000000				167	123	120	201	155	143	0.0564	0.0455	0.0424	3.8	12.28	8.39	24.47	34942	3878.8	6.38	0
IPI00940945.2	Isoform 1 of Cytosolic phospholipase A2 zeta	0.1201	5	1	6	9	71810000				681200000				86500000				3	2	4	3	2	4	0.0542	0.0236	0.0907	0	0	0	0	849	95	5.44	0
IPI00942176.1	A-kinase anchor protein 7 isoform gamma	0.089	3	1	2	8	0				17560000				0				1	2	1	1	4	3	0.0491	0.089	0.0491	0	0	0	0	326	37	5.96	0
IPI00945836.1	Protein	0.2551	1	1	5	6	72490000				0				15550000				2		3	2		4	0.0567		0.1984	0		0	0	247	27.6	7.58	0
IPI00946754.1	Protease serine 1	0.2113	6	1	2	2	45630000				2216000000				0				1	1		1	1		0.0704	0.1408		0	0		0	142	15.4	7.27	0
IPI00956024.1	protein transport protein Sec23B isoform 2	0.1215	6	1	6	11	236700000				55190000				105300000				4	2	3	5	2	4	0.0774	0.0347	0.0841	4.54	2.48	2.78	9.8	749	84.4	6.99	0
IPI00956049.1	cDNA FLJ55466, highly similar to G-rich sequence factor 1	0.1719	7	1	5	6	81410000				0				68250000				2	1	2	3	1	2	0.0692	0.0268	0.0759	0	0	2.32	2.32	448	50.7	6.29	0
IPI00964552.1	Uncharacterized protein	0.1068	5	1	32	46	1635000000				889900000				206800000				16	8	12	21	10	15	0.0653	0.0261	0.046	0	0	0	0	3062	333	5.53	0
IPI00964924.1	Isoform 3 of Nuclear receptor-binding protein 2	0.1512	4	1	4	7	125600000				313000000				197500000				1	1	3	1	2	4	0.034	0.0463	0.1204	0	0	0	0	324	36	9.41	0
IPI00965848.1	Isoform 5 of Protein FAM13A	0.1839	6	1	8	11	66940000				24290000				1257000000				4	4	1	5	4	2	0.0972	0.0792	0.0404	0	0	0	0	669	77.2	6.16	0
IPI00965871.1	Protein	0.0882	1	1	1	1	76230000				0				0				1			1			0.0882			0			0	136	15.3	10.45	0
IPI00966465.2	Uncharacterized protein	0.1506	6	1	16	30	225700000				484100000				262500000				5	7	7	7	9	14	0.0575	0.0612	0.0759	0	0	0	0	817	95	5.49	0
IPI00966829.1	69 kDa protein	0.2235	11	5	15	56	1373000000				381900000				752900000				8	9	6	28	15	13	0.1126	0.1391	0.0911	7.81	0	1.77	9.58	604	69.2	6.37	0
IPI00966982.1	Uncharacterized protein	0.4	1	1	4	11	168100000				440100000				165000000				2	2	3	3	4	4	0.3333	0.2952	0.3429	0	0	0	0	105	12	11.41	0
IPI00973420.1	MAML2 protein	0.092	2	1	8	21	29870000000				834600000				121400000				6	3	2	8	11	2	0.0547	0.0243	0.0373	0	0	0	0	1152	124.6	9.42	0
IPI00975710.1	Uncharacterized protein	0.1471	1	1	1	5	0				0				4413000				1	1	1	1	1	3	0.1471	0.1471	0.1471	0	0	0	0	102	12.1	7.34	0
IPI00980553.1	cDNA FLJ50204, highly similar to 2,4-dienoyl-CoA reductase, mitochondrial	0.1288	5	1	3	5	148300000				244500000				277200000				1	2	2	1	2	2	0.0429	0.0859	0.0859	0	1.96	0	1.96	326	35	8.9	0
IPI00981844.1	mucin-4 isoform a	0.0166	9	1	6	24	88630000				54040000				89040000				2	3	4	2	7	15	0.0091	0.0124	0.0105	0	0	0	0	5412	542	5.3	0
IPI00982449.1	Uncharacterized protein	0.0735	4	1	9	11	201000000				86480000				158300000				4	4	3	4	4	3	0.0334	0.0312	0.0252	0	0	0	0	1347	153	6.18	0
IPI00983445.1	cDNA, FLJ79081, highly similar to Squalene synthetase	0.1498	7	1	5	14	4789000				179200000				1509000000				3	2	3	5	3	6	0.097	0.0696	0.0928	1.74	0	1.99	3.73	474	53.4	7.27	0
IPI00985077.1	Uncharacterized protein	0.4444	3	1	4	8	297600000				5544000000				321800000				2	2	3	2	2	4	0.3086	0.2469	0.3333	0	0	0	0	81	9.3	9.69	0
IPI01008911.1	RAS p21 protein activator 4	0.1706	11	1	12	14	63760000				148900000				277700000				5	2	6	6	2	6	0.0772	0.0286	0.1034	0	0	0	0	803	90.4	7.93	0
IPI01009435.1	THO complex subunit 2	0.161	2	1	21	34	947700000				877700000				10780000000				12	10	6	15	12	7	0.0934	0.0832	0.0453	0	1.66	0	1.66	1478	169.5	8.68	0
IPI01009440.1	cDNA FLJ61314, highly similar to Receptor-type tyrosine-protein phosphatase alpha	0.1824	7	1	13	54	211600000				221500000				368800000				5	6	6	23	16	15	0.0638	0.1049	0.1185	0	0	1.63	1.63	658	75.8	7.72	0
IPI01011751.2	Uncharacterized protein	0.15	8	1	6	6	0				275700000				117400000				1	3	2	1	3	2	0.0269	0.0846	0.0481	0	0	0	0	520	57.5	9.38	0
IPI01011942.1	Uncharacterized protein	0.1518	5	1	13	23	135300000				340000000				147000000				6	5	7	6	7	10	0.0657	0.0578	0.0917	0	0	0	0	883	97.4	6.73	0
IPI01014152.1	SLC4A2 protein	0.0889	14	1	13	18	2079000000				64230000				40720000				9	4	2	11	5	2	0.0647	0.0267	0.0181	0	0	0	0	1159	127.6	6.52	0
IPI01014716.1	39 kDa protein	0.1947	4	1	7	10	413800000				0				420500000				5		3	7		3	0.1563		0.0678	0		0	0	339	38.8	6.27	0
IPI01014777.1	cDNA FLJ53007, highly similar to UBA/UBX 33.3 kDa protein	0.225	5	1	5	7	101500000				94200000				44160000				1	4	1	1	5	1	0.045	0.225	0.05	0	2.06	0	2.06	200	22.9	9.13	0
IPI01015295.1	Uncharacterized protein	0.1593	3	2	8	9	1046000000				46920000				27980000				5	2	2	5	2	2	0.1113	0.048	0.0518	0	1.87	1.68	3.55	521	59.7	8.6	0
IPI01021276.1	Isoform 2 of Zinc finger protein 385A	0.1719	4	1	4	6	256000000				80690000				56760000				2	1	2	2	1	3	0.0842	0.0526	0.0842	0	0	0	0	285	30.2	10.2	0
IPI01021451.1	Uncharacterized protein	0.0796	3	1	28	54	443600000				318500000				920200000				11	12	15	19	17	18	0.0316	0.0349	0.0447	0	0	1.69	1.69	4272	468.4	6.14	0
IPI01021497.1	Uncharacterized protein	0.1724	4	1	5	6	76580000				58380000				358000				3	1	1	4	1	1	0.0902	0.0531	0.0292	0	0	0	0	377	40.8	6.25	0
IPI01024708.1	14 kDa protein	0.0923	3	1	1	6	6519000				909700000				840400000				1	1	1	1	2	3	0.0923	0.0923	0.0923	0	0	0	0	130	13.8	8.09	0
IPI01026217.1	cDNA FLJ58647, highly similar to Signal-induced proliferation-associated 1-likeprotein 1	0.0976	4	1	17	27	1013000000				1523000000				719100000				6	8	8	7	9	11	0.0455	0.0589	0.0505	0	0	0	0	1782	197.3	8.29	0
IPI00017412.1	Isoform 1 of Replication factor C subunit 2	0.1271	2	1	3	6	0				33550000				199500000					2	2		4	2		0.0763	0.0791		5.47	0	5.47	354	39.1	6.44	0
IPI00017924.4	Isoform 2 of Probable G-protein coupled receptor 110	0.1743	4	1	3	5	0				42140000				21200000					1	2		1	4		0.055	0.1193		0	0	0	218	24.9	8.75	0
IPI00020566.1	PRO1722	0.1949	1	1	1	2	0				66150000				55310000					1	1		1	1		0.1949	0.1949		0	0	0	118	13.1	9.11	0
IPI00063781.6	Retina and anterior neural fold homeobox protein 2	0.0707	3	1	1	5	0				1233000				0					1	1		2	3		0.0707	0.0707		0	0	0	184	20.1	9.45	0
IPI00433194.2	Isoform 3 of EH domain-binding protein 1	0.1034	3	1	11	12	0				88920000				306800000					6	6		6	6		0.0664	0.05		0	0	0	1160	132.2	5.85	0
IPI00640179.1	Uncharacterized protein	0.2762	2	1	3	3	0				8322000				37560000					1	2		1	2		0.0952	0.181		0	0	0	105	11.7	10.2	0
IPI00744350.3	Conserved hypothetical protein	0.1568	1	1	3	3	0				25130000				25580000					1	2		1	2		0.0508	0.1059		0	0	0	236	24.6	11.22	0
IPI00916486.1	Uncharacterized protein	0.0549	2	1	1	1	0				126300000				0					1			1			0.0549			0		0	237	26.5	6.25	0
IPI00921163.1	transducin-like enhancer protein 2 isoform 2	0.0482	1	1	2	2	0				0				197300000					1	1		1	1		0.0113	0.0368		0	0	0	706	75.3	6.24	0
IPI00925113.1	Methylmalonyl-CoA epimerase variant	0.1538	2	1	1	2	0				114300000				89820000					1	1		1	1		0.1538	0.1538		0	0	0	78	8.4	8.75	0
IPI00967724.1	16 kDa protein	0.1293	1	1	1	1	0				48380000				0					1			1			0.1293			0		0	147	16.2	8.81	0
IPI00980134.1	Conserved hypothetical protein	0.459	1	1	4	4	0				835600000				156400000					2	2		2	2		0.1885	0.2705		0	0	0	122	14.2	9.47	0
IPI01010280.1	cDNA FLJ54160, highly similar to Carbonic anhydrase 3	0.168	1	1	3	5	0				1000000000				495700000					1	3		2	3		0.0697	0.168		0	0	0	244	27.6	7.83	0
IPI00032820.1	PRO2796	0.2321	1	1	1	1	0				0				106500000						1			1			0.2321			1.76	1.76	56	6.6	8.34	0
IPI00935524.1	Ubiquitin carboxyl-terminal hydrolase	0.0623	2	1	3	5	0				0				108200000						3			5			0.0623			0	0	530	59.6	8.07	0

## Sheet: MCF7_Protein
Accession	Description	Sum(Coverage)	Sum(# Proteins)	Sum(# Unique Peptides)	Sum(# Peptides)	Sum(# PSMs)	A4: Area	A4: Heavy/Light	A4: Heavy/Light Count	A4: Heavy/Light Variability [%]	B4: Area	B4: Heavy/Light	B4: Heavy/Light Count	B4: Heavy/Light Variability [%]	C4: Area	C4: Heavy/Light	C4: Heavy/Light Count	C4: Heavy/Light Variability [%]	# Peptides A8	# Peptides B8	# Peptides C8	# PSM A8	# PSM B8	# PSM C8	Coverage A8	Coverage B8	Coverage C8	Score A8	Score B8	Score C8	Score Sum	# AAs	MW [kDa]	calc. pI	SILAC positive
IPI00479946.4	STIP1 protein	0.2661	5	2	16	30	1037000000	4.467	1		186500000	0.776	1		285100000	0.726	1		8	8	7	12	10	8	0.1797	0.1814	0.1644	4.25	3.61	4.06	11.92	590	68	7.74	3
IPI00147874.1	Sialic acid synthase	0.2674	4	2	6	10	28940000	3.791	1		243400000	1.466	1		15000000				2	2	3	2	3	5	0.0752	0.0808	0.1532	2.86	3.11	2.85	8.82	359	40.3	6.74	2
IPI00744148.2	Isoform 1 of Core histone macro-H2A.1	0.1301	4	1	3	6	72980000	2.118	1		34780000	1.88	1		55980000	1.944	1		1	3	1	1	4	1	0.0542	0.1301	0.0542	0	0	0	0	369	39.2	9.83	3
IPI00449049.5	Poly [ADP-ribose] polymerase 1	0.1834	2	2	19	39	673700000	1.846	1		727500000				271700000	1.105	1		7	12	10	10	15	14	0.0828	0.143	0.1065	4.86	6.34	8.31	19.51	1014	113	8.88	2
IPI00965269.1	cDNA, FLJ79275, highly similar to T-complex protein 1 subunit epsilon	0.2386	7	3	8	14	134700000	1.789	1		142200000	0.838	2	151.9	78090000	6.683	2	18524.8	3	5	6	3	5	6	0.0875	0.159	0.1789	0	3.62	7.79	11.41	503	55.3	5.48	3
IPI00028160.1	Isoform 1 of Porphobilinogen deaminase	0.2465	5	1	5	9	9054000	1.472	1		16770000	0.565	2	20.6	247200000				2	2	2	3	3	3	0.1025	0.108	0.0914	3.54	4.09	0	7.63	361	39.3	7.18	2
IPI00020599.1	Calreticulin	0.1655	1	2	7	16	151600000	1.464	2	92.6	42740000	0.839	1		243100000	1.023	1		4	3	3	4	6	6	0.1127	0.0815	0.0767	1.71	1.86	0	3.57	417	48.1	4.44	3
IPI00185919.3	Isoform 1 of La-related protein 1	0.2217	7	2	25	51	987300000	1.454	1		575000000	1.416	1		396500000	1.263	1		12	11	12	17	14	20	0.1177	0.1004	0.1305	3.98	3.93	1.83	9.74	1096	123.4	8.82	3
IPI00479145.3	Keratin, type I cytoskeletal 19	0.6125	14	12	20	99	2057000000	1.412	16	12.7	1825000000	1.361	15	17.8	1943000000	1.338	13	14.1	13	11	13	35	31	33	0.36	0.375	0.385	72.94	71.43	78.36	222.73	400	44.1	5.14	3
IPI00554648.3	Keratin, type II cytoskeletal 8	0.5487	49	15	30	178	7610000000	1.382	24	9	5754000000	1.372	17	16.3	4576000000	1.286	18	11.4	22	17	19	59	58	61	0.4783	0.3623	0.3292	79.24	70.32	71.16	220.72	483	53.7	5.59	3
IPI00291930.7	Isoform 1 of Clathrin interactor 1	0.064	3	1	4	8	1645000000	1.376	1		2233000000	1.476	1		5160000000				3	2	1	5	2	1	0.0432	0.0304	0.0208	0	0	0	0	625	68.2	6.42	2
IPI00879904.1	Isoform 2 of Tubulin alpha chain-like 3	0.1552	2	1	6	7	22330000	1.345	1		70500000				146300000	0.641	1		2	2	3	2	2	3	0.0764	0.0493	0.0936	2.64	0	0	2.64	406	45.5	6.32	2
IPI00013068.1	Eukaryotic translation initiation factor 3 subunit E	0.1573	8	2	6	17	122200000	1.343	1		160000000	0.882	2	17.1	60660000	0.632	1		3	4	2	6	6	5	0.0697	0.1169	0.0494	6.36	2.52	6.97	15.85	445	52.2	6.04	3
IPI01022863.1	Citrate synthase	0.285	17	3	9	20	1273000000	1.34	2	78.6	329300000	0.818	2	7.3	233100000	0.8	3	11.4	7	2	6	10	3	7	0.225	0.0675	0.25	9.85	6.42	8.78	25.05	400	44.7	7.18	3
IPI00000846.2	Isoform 1 of Chromodomain-helicase-DNA-binding protein 4	0.1334	6	1	25	38	732800000	1.275	1		3546000000	1.332	1		9553000000	1.109	1		7	10	16	8	12	18	0.0465	0.0481	0.0952	3.66	2.96	2.55	9.17	1912	217.9	5.86	3
IPI00010951.2	Epiplakin	0.3344	1	15	37	130	7525000000	1.265	15	21.7	6522000000	1.191	13	10.3	777100000	1.122	16	17.6	23	27	19	42	51	37	0.2664	0.2495	0.2269	94.45	96.98	87.65	279.08	5090	555.3	5.6	3
IPI00300074.4	Phenylalanyl-tRNA synthetase beta chain	0.0934	1	1	5	11	5569000000	1.251	1		98090000	1.096	1		90340000				3	2	2	6	2	3	0.0645	0.0289	0.0374	0	0	0	0	589	66.1	6.84	2
IPI00013475.1	Tubulin beta-2A chain	0.4202	14	2	15	84	951700000	1.243	1		694100000	1.166	1		594600000	1.057	2	35.7	13	11	11	27	31	26	0.3775	0.3483	0.3865	47.74	56.66	55.34	159.74	445	49.9	4.89	3
IPI00017283.2	Isoleucyl-tRNA synthetase, mitochondrial	0.1512	1	2	12	17	52920000	1.157	1		398200000	0.999	1		650400000	0.758	1		2	7	6	3	8	6	0.0336	0.0978	0.0682	6.36	6.53	2.82	15.71	1012	113.7	7.2	3
IPI00797037.2	95 kDa protein	0.1482	4	2	10	17	200100000	1.148	2	51.4	160000000	1.126	1		3395000000	1.445	1		5	3	5	7	4	6	0.0671	0.0518	0.0765	6.18	5.48	6.47	18.13	850	95.2	6.81	3
IPI00908896.2	Uncharacterized protein	0.2028	13	1	7	17	161500000	1.13	1		171300000	1.159	1		243700000	1.114	1		5	4	4	6	6	5	0.1772	0.1375	0.1189	10.8	9.22	7.85	27.87	429	47.1	6.34	3
IPI00216952.1	Isoform C of Prelamin-A/C	0.3164	10	4	16	33	538200000	1.128	2	11.2	534900000	0.991	3	6.7	1361000000	1.219	1		6	13	5	8	17	8	0.1503	0.2657	0.1259	1.72	2.84	4.42	8.98	572	65.1	6.84	3
IPI00554788.5	Keratin, type I cytoskeletal 18	0.4907	4	12	16	148	5074000000	1.09	16	10.6	5628000000	1.18	13	12.4	4247000000	1.115	14	7	12	12	11	52	48	48	0.4	0.4093	0.3884	109.25	109.47	99.06	317.78	430	48	5.45	3
IPI00031517.1	DNA replication licensing factor MCM6	0.1255	2	3	9	18	21940000	1.078	2	86.1	76010000	1.489	1		68710000	0.846	3	121.8	4	4	7	5	5	8	0.056	0.0536	0.0987	1.98	0	4.16	6.14	821	92.8	5.41	3
IPI00414696.1	Isoform A2 of Heterogeneous nuclear ribonucleoproteins A2/B1	0.3548	4	6	14	51	745100000	1.063	8	14.6	201900000	0.969	7	19.5	247600000	1.009	5	4.5	9	8	5	20	18	13	0.3167	0.2141	0.1642	18.29	17.7	22.47	58.46	341	36	8.65	3
IPI00000494.6	60S ribosomal protein L5	0.229	2	1	8	19	157000000	1.063	1		110100000	1.185	1		90270000				5	3	4	5	3	11	0.1785	0.1549	0.1178	2.51	2.51	0	5.02	297	34.3	9.72	2
IPI00742682.2	Nucleoprotein TPR	0.157	1	2	40	67	364200000	1.034	1		533300000	0.414	1		1926000000				15	16	21	21	20	26	0.0664	0.0736	0.1041	3.35	0	0	3.35	2363	267.1	5.02	2
IPI00009104.7	RuvB-like 2	0.1749	2	2	5	8	55900000	1.033	1		153300000	0.796	2	41.5	30080000	1.027	2	30.5	2	4	2	2	4	2	0.0821	0.1274	0.0691	3.63	5.37	4.88	13.88	463	51.1	5.64	3
IPI01022801.1	Uncharacterized protein	0.3191	19	4	8	37	1081000000	1.032	5	39.4	866600000	1.092	5	19.7	88160000	1.122	5	47.5	7	7	5	15	13	9	0.3059	0.2829	0.2401	16.89	14.99	7.22	39.1	304	32.7	9.44	3
IPI01014584.1	Uncharacterized protein	0.264	2	3	5	13	96260000	1.013	3	91.8	102600000	0.847	3	19.8	89120000	0.618	2	9.1	4	2	3	5	3	5	0.2143	0.1242	0.1739	13.34	7.31	11.81	32.46	322	37.3	5.85	3
IPI00170429.3	Isoform 1 of 2-oxoglutarate and iron-dependent oxygenase domain-containing protein 1	0.1458	3	1	8	15	193600000	1.005	1		51210000	1.581	1		179400000	0.925	1		5	5	3	6	6	3	0.1107	0.0978	0.0627	2.94	5.36	3.39	11.69	542	63.2	5.11	3
IPI00983539.2	Uncharacterized protein	0.1756	16	3	8	35	45640000	1.003	2	19.3	62800000	0.857	2	46.9	65220000	0.941	2	19.3	5	7	4	12	14	9	0.0981	0.1756	0.0947	9.77	13.45	9.55	32.77	581	63.9	7.87	3
IPI00930688.1	Tubulin alpha-1B chain	0.5033	25	2	15	160	1466000000	0.996	4	13.2	1647000000	0.946	1		1768000000	0.925	3	0.6	12	13	10	48	55	57	0.4412	0.4324	0.3792	104.42	85.91	104.15	294.48	451	50.1	5.06	3
IPI00639819.1	Uncharacterized protein	0.2237	4	2	7	12	30980000	0.993	1		1337000000	0.829	1		707800000	0.897	1		3	3	4	3	3	6	0.0915	0.1356	0.1695	0	0	1.66	1.66	295	33.4	6.55	3
IPI00909239.1	Isoform 2 of Alpha-actinin-1	0.2356	17	1	21	61	3955000000	0.991	1		396900000	0.843	1		3857000000	0.745	1		11	14	12	17	25	19	0.1488	0.177	0.1477	11.45	11.08	7.93	30.46	887	102.6	5.5	3
IPI00026516.1	Succinyl-CoA:3-ketoacid-coenzyme A transferase 1, mitochondrial	0.2827	4	3	10	20	103400000	0.983	2	22.2	38690000	0.744	2	24.4	42690000	0.486	2	4.2	6	6	3	8	8	4	0.1769	0.2096	0.1135	17.66	19.81	10.49	47.96	520	56.1	7.46	3
IPI00003881.5	Heterogeneous nuclear ribonucleoprotein F	0.1855	4	1	7	20	1709000000	0.97	1		1565000000	1.368	1		201400000	0.985	1		5	4	4	7	5	8	0.1663	0.1181	0.1229	9.11	7	8.73	24.84	415	45.6	5.58	3
IPI00645452.1	Uncharacterized protein	0.561	22	3	17	90	1325000000	0.959	3	10.5	899800000	0.859	2	0.9	683100000	0.887	3	1.5	16	11	11	32	31	27	0.5329	0.3826	0.3967	56.33	63.38	63.11	182.82	426	47.7	4.81	3
IPI01011853.1	cDNA FLJ35358 fis, clone PUAEN2000497, highly similar to Tubulin beta-6 chain	0.3529	5	2	12	47	951700000	0.951	1		529700000	1.719	1		514200000	0.337	1		8	8	8	15	16	16	0.262	0.2727	0.3021	20.41	14.79	15.65	50.85	374	41.9	4.91	3
IPI00304596.3	Non-POU domain-containing octamer-binding protein	0.2909	6	2	15	38	269800000	0.95	2	32.5	220500000	1.052	3	17	205300000	1.05	3	7.1	6	10	6	10	16	12	0.1635	0.2251	0.1401	9.51	20.57	15.29	45.37	471	54.2	8.95	3
IPI00012313.3	Golgi phosphoprotein 3-like	0.1474	6	1	3	10	12600000	0.941	1		10100000	0.952	1		0				2	2		3	7		0.0842	0.1088		2.31	0		2.31	285	32.7	5.83	2
IPI00008215.1	NADP-dependent malic enzyme	0.2902	4	6	9	26	74740000	0.938	3	12.5	493100000	0.777	4	24.2	450000000	0.742	3	20.1	5	8	4	8	10	8	0.1941	0.2448	0.1399	21.63	18.69	17.48	57.8	572	64.1	6.13	3
IPI01012504.1	6-phosphogluconate dehydrogenase, decarboxylating	0.3277	5	8	11	47	466100000	0.938	8	25.4	129800000	0.792	8	8	429700000	0.853	9	18.3	9	8	9	15	15	17	0.2511	0.2511	0.2979	26.91	34.11	27.06	88.08	470	51.8	7.44	3
IPI01011531.3	cDNA FLJ54149, highly similar to Annexin A7	0.2202	4	1	7	13	30980000	0.924	1		28170000	0.984	1		49170000				3	4	3	3	5	5	0.1071	0.1607	0.0893	2.98	2.04	0	5.02	336	37.8	7.18	2
IPI00909722.1	Putative uncharacterized protein	0.2159	6	2	10	13	209900000	0.922	1		21290000	0.783	2	29.5	26890000	0.702	1		4	4	4	4	5	4	0.0973	0.108	0.0903	0	3.82	2.55	6.37	565	63.8	9.17	3
IPI01022190.1	Uncharacterized protein	0.3938	25	3	5	10	108600000	0.921	1		110200000	0.848	2	19.5	333400000				2	2	3	3	3	4	0.1563	0.1875	0.25	2.27	5.41	5.33	13.01	160	17	7.69	2
IPI00011126.6	26S protease regulatory subunit 4	0.2682	6	4	10	25	127600000	0.917	4	14.3	101200000	0.908	4	15.3	137000000	0.887	3	4.4	7	6	7	9	7	9	0.2136	0.1909	0.1864	14.33	10.28	12.19	36.8	440	49.2	6.21	3
IPI00479385.4	Isoform 1 of N-acetylserotonin O-methyltransferase-like protein	0.2029	4	2	8	17	557800000	0.914	1		27080000	0.96	1		600600000	0.871	3	18.5	7	1	5	9	1	7	0.182	0.0274	0.1417	4.88	0	5.42	10.3	621	68.8	6.07	3
IPI00413451.3	Serpin B6	0.1051	1	2	3	11	148500000	0.913	2	36.9	72560000	0.945	1		38830000	0.842	1		3	3	2	4	4	3	0.1051	0.1051	0.0807	7.46	7.57	7.52	22.55	409	46.3	5.76	3
IPI00007293.4	Isoform 1 of Centrosomal protein of 164 kDa	0.1514	3	1	16	34	641900000	0.912	1		129500000				880900000	0.848	1		8	9	7	13	10	11	0.0733	0.0808	0.0699	1.78	1.79	0	3.57	1460	164.2	5.36	2
IPI00027252.6	Prohibitin-2	0.3177	9	5	9	18	826300000	0.909	5	12.1	185700000	0.814	2	26.3	390800000	0.92	3	5.3	7	3	4	9	4	5	0.2508	0.1204	0.1773	1.87	1.87	0	3.74	299	33.3	9.83	3
IPI00185374.4	26S proteasome non-ATPase regulatory subunit 12	0.2961	2	3	9	23	143900000	0.908	1		593700000	0.735	1		186400000				3	6	5	7	9	7	0.1184	0.2018	0.1886	9.53	7.15	8.16	24.84	456	52.9	7.65	2
IPI00304692.1	Heterogeneous nuclear ribonucleoprotein G	0.4501	7	3	17	30	321100000	0.903	2	19.6	981500000	0.953	1		192700000	0.903	1		9	8	7	12	10	8	0.2251	0.2737	0.2123	0	1.77	1.73	3.5	391	42.3	10.05	3
IPI01013601.1	Uncharacterized protein	0.1461	3	1	5	11	75900000	0.897	1		35250000	0.874	1		53580000	0.99	1		4	3	2	6	3	2	0.1318	0.0974	0.0516	4.53	2.31	4	10.84	349	38.6	7.21	3
IPI00784154.1	60 kDa heat shock protein, mitochondrial	0.4956	9	18	23	188	1425000000	0.892	26	7.9	748900000	0.865	28	11.1	726400000	0.892	24	13.4	15	18	17	64	66	58	0.3839	0.4206	0.3962	135.76	140.02	127.95	403.73	573	61	5.87	3
IPI00023728.1	Gamma-glutamyl hydrolase	0.2264	2	3	5	16	58150000	0.891	3	5.7	80990000	1.036	2	69.1	69190000	0.9	2	65.5	4	3	3	7	5	4	0.1981	0.1478	0.1509	19.9	12.07	15.36	47.33	318	35.9	7.11	3
IPI00303476.1	ATP synthase subunit beta, mitochondrial	0.3932	7	13	13	76	629300000	0.886	17	9.6	610000000	0.899	11	15.9	494000000	0.826	11	19.2	11	12	11	30	25	21	0.3459	0.3592	0.3308	52.4	34.88	33.57	120.85	529	56.5	5.4	3
IPI00893431.2	cDNA FLJ53410, highly similar to Eukaryotic translation initiation factor 3 subunit 9	0.145	5	4	11	30	1198000000	0.883	2	12.5	98010000	0.927	1		1488000000				7	4	5	10	8	12	0.1043	0.0732	0.061	4.65	0	0	4.65	738	85.1	5.26	2
IPI01009308.1	Uncharacterized protein	0.1571	6	1	18	27	69990000	0.883	1		1199000000	0.948	1		1312000000				6	9	7	10	10	7	0.0613	0.0881	0.0565	2.07	0	0	2.07	1044	119.4	9.45	2
IPI00022334.1	Ornithine aminotransferase, mitochondrial	0.1754	2	3	5	13	88610000	0.879	3	46	80320000	0.91	3	29.4	76520000	1.056	2	23.5	3	3	4	4	4	5	0.1071	0.1071	0.1298	6.81	6.06	3.46	16.33	439	48.5	7.03	3
IPI00418202.2	Uncharacterized protein	0.3419	4	3	7	35	86620000	0.876	5	5.9	58710000	0.858	4	4.9	65350000	0.822	5	20.7	4	3	5	12	10	13	0.2537	0.2132	0.2978	19.49	22.5	24.01	66	272	30.6	6.65	3
IPI00010740.1	Isoform Long of Splicing factor, proline- and glutamine-rich	0.2617	2	3	16	27	607800000	0.873	2	11.8	726000000	1.062	3	15.6	236300000	1.545	2	44.8	6	8	7	9	10	8	0.1358	0.1513	0.1513	10.48	10.89	6.93	28.3	707	76.1	9.44	3
IPI00017763.8	Uncharacterized protein	0.1891	13	2	7	9	1316000000	0.871	1		51690000	0.628	2	17.4	579900000				3	3	3	3	3	3	0.0803	0.0881	0.0881	0	0	0	0	386	44.1	4.82	2
IPI00455315.4	Isoform 1 of Annexin A2	0.4602	5	5	13	32	174200000	0.867	5	10.9	124400000	0.864	4	28.1	374500000	0.899	4	19.3	11	5	8	15	6	11	0.3776	0.2242	0.354	13.66	12.89	17.01	43.56	339	38.6	7.75	3
IPI00908949.1	cDNA FLJ53464, highly similar to Threonyl-tRNA synthetase, cytoplasmic	0.2606	7	3	15	25	144100000	0.867	1		1242000000	0.881	1		555600000	0.88	1		5	6	7	6	10	9	0.0833	0.1111	0.1204	4.77	5.03	4.18	13.98	756	86.8	6.77	3
IPI00008274.8	Isoform 1 of Adenylyl cyclase-associated protein 1	0.2821	13	6	10	45	225600000	0.866	4	38.4	214700000	0.681	4	9.7	115500000	0.731	6	19.2	7	6	5	17	15	13	0.2358	0.2168	0.1579	23.75	20.31	25.53	69.59	475	51.9	8.06	3
IPI00298961.3	Exportin-1	0.0495	7	3	5	13	113900000	0.864	3	33	26080000	0.695	2	32	42290000	0.796	2	18.5	4	3	3	5	4	4	0.042	0.0345	0.0308	5.72	3.93	0	9.65	1071	123.3	6.06	3
IPI00007402.3	Importin-7	0.1166	2	5	9	16	44940000	0.862	1		44010000	0.685	2	21	19400000	0.77	2	8.2	4	6	3	4	8	4	0.0559	0.0723	0.0414	4.15	9.44	5.76	19.35	1038	119.4	4.82	3
IPI00027626.3	T-complex protein 1 subunit zeta	0.3861	6	4	17	47	584500000	0.862	4	3.7	220600000	0.756	4	12.8	669500000	0.784	3	12.4	8	10	6	16	18	13	0.2015	0.2335	0.145	22.26	26.09	16.31	64.66	531	58	6.68	3
IPI00003918.6	60S ribosomal protein L4	0.3349	3	3	15	28	553000000	0.86	2	76	1717000000	0.582	2	25.6	321400000	0.816	2	45.4	6	9	6	7	13	8	0.1546	0.2272	0.1639	6.89	4.62	3.89	15.4	427	47.7	11.06	3
IPI00030654.1	Isoform 2 of Cleavage and polyadenylation specificity factor subunit 6	0.1718	5	1	10	26	1152000000	0.86	2	7.5	714500000	0.844	2	2.8	765300000	0.848	2	6	6	4	5	9	9	8	0.1224	0.0867	0.1105	11.34	7.47	6.82	25.63	588	63.4	7.71	3
IPI01026194.1	88 kDa protein	0.2522	11	1	15	59	1130000000	0.859	1		899800000	0.66	1		920600000				12	13	9	21	23	15	0.1857	0.2409	0.1556	21.29	32.19	28.45	81.93	797	88.3	5.86	2
IPI00783271.1	Leucine-rich PPR motif-containing protein, mitochondrial	0.2704	6	16	24	76	331000000	0.858	11	16.8	364600000	0.814	12	20.9	394500000	0.86	12	16.2	15	16	18	23	25	28	0.175	0.1808	0.2009	38	36.65	31.94	106.59	1394	157.8	6.13	3
IPI01015554.1	cDNA FLJ36221 fis, clone THYMU2000950, highly similar to Eukaryotic translation initiation factor 3 subunit 6-interacting protein	0.191	5	3	12	24	448600000	0.857	2	3.5	121800000	0.836	3	0.9	124800000	0.842	2	20.6	6	9	3	10	10	4	0.1202	0.176	0.0687	6.68	6.45	2.67	15.8	466	55.1	8.95	3
IPI00012575.1	Pirin	0.2	1	1	3	6	97750000	0.855	1		74470000	0.946	1		120700000	0.811	1		2	2	1	2	3	1	0.1069	0.1345	0.0414	1.89	0	2.3	4.19	290	32.1	6.92	3
IPI00910267.1	Aspartate aminotransferase	0.1525	2	2	6	16	381500000	0.854	1		219700000	0.695	2	55.4	487500000	0.68	2	45.3	5	4	4	5	5	6	0.1395	0.1137	0.1059	0	2.12	0	2.12	387	43	9.29	3
IPI00552072.2	Uncharacterized protein	0.2774	7	5	11	37	210100000	0.853	4	8	126300000	0.815	3	23.7	219500000	0.808	5	23.5	7	8	6	11	14	12	0.2016	0.2056	0.1557	5.62	8.85	16.34	30.81	501	54.7	7.64	3
IPI00014898.3	Isoform 1 of Plectin	0.2312	12	10	98	161	21130000000	0.846	3	8.9	4396000000	0.899	5	31.7	4106000000	0.896	5	28.5	46	45	37	54	60	47	0.117	0.1117	0.0895	7.98	13.94	5.97	27.89	4684	531.5	5.96	3
IPI01012004.1	cDNA PSEC0175 fis, clone OVARC1000169, highly similar to Protein disulfide-isomerase A3	0.3521	6	7	14	51	131900000	0.844	8	13.2	1256000000	0.766	7	21.7	236300000	0.776	10	6.5	6	10	9	13	16	22	0.1646	0.2958	0.2167	30.08	20.77	34.73	85.58	480	54.1	7.21	3
IPI00902588.2	cDNA FLJ38699 fis, clone KIDNE2002168, highly similar to Short chain 3-hydroxyacyl-CoA dehydrogenase, mitochondrial	0.2201	3	2	6	16	235600000	0.842	1		215800000	0.884	2	12.6	95700000	1.911	2	191.4	5	4	3	6	6	4	0.2201	0.2107	0.1604	7.64	10.31	4.44	22.39	318	35.2	7.21	3
IPI00964123.1	Uncharacterized protein	0.2228	4	4	7	22	107900000	0.841	2	1.9	299600000	0.842	2	25.2	461100000	0.779	3	47.6	2	4	7	4	8	10	0.0702	0.138	0.2228	13.4	11.38	8.42	33.2	413	45.6	6.68	3
IPI00894340.1	Uncharacterized protein	0.162	16	3	4	13	114000000	0.838	3	7.4	106200000	0.664	2	8	107000000	0.745	2	3.4	4	3	3	5	5	3	0.162	0.109	0.109	5.12	2.44	5.6	13.16	321	36.9	6.18	3
IPI00658109.1	Isoform 1 of Creatine kinase U-type, mitochondrial	0.2422	3	2	8	13	34650000	0.837	2	22.9	91910000	0.784	2	10.4	59460000	0.587	2	50.3	3	5	4	3	5	5	0.1175	0.1751	0.1415	0	2.09	1.98	4.07	417	47	8.34	3
IPI00217975.4	Lamin-B1	0.1911	3	2	8	16	265500000	0.834	1		123700000	0.819	1		64610000	0.81	1		4	6	2	6	7	3	0.116	0.1229	0.0597	9.46	9.57	8.14	27.17	586	66.4	5.16	3
IPI00744692.1	Transaldolase	0.1632	2	3	5	10	204700000	0.834	1		179000000	0.709	1		64380000	1.299	3	25.7	2	2	4	2	2	6	0.0801	0.0801	0.1157	0	0	0	0	337	37.5	6.81	3
IPI01013021.1	cDNA FLJ52478, highly similar to Eukaryotic translation initiation factor 3 subunit 5	0.149	6	2	2	14	94490000	0.833	2	3.5	85210000	0.786	3	16	70760000	0.748	3	21.6	1	2	2	3	6	5	0.0913	0.149	0.149	10.88	10	7.39	28.27	208	23.2	5.8	3
IPI01013091.1	Uncharacterized protein	0.2185	5	2	5	10	66260000	0.833	1		87180000	0.823	2	1	99700000	0.814	1		3	3	1	4	4	2	0.1788	0.0927	0.053	9.52	5.9	4.29	19.71	302	34.5	6.46	3
IPI00302925.4	59 kDa protein	0.2706	5	6	11	25	1449000000	0.828	1		1290000000	0.843	3	163	123500000	1.011	2	50.2	5	7	4	7	11	7	0.1261	0.1664	0.0932	0	0	1.68	1.68	547	59.4	5.78	3
IPI00420014.2	Isoform 1 of U5 small nuclear ribonucleoprotein 200 kDa helicase	0.14	7	4	24	38	237600000	0.828	2	12.1	134000000	1.02	1		1044000000	0.551	2	72.5	9	11	12	11	13	14	0.059	0.0581	0.0665	4.04	1.78	1.7	7.52	2136	244.4	6.06	3
IPI00028091.3	Actin-related protein 3	0.2584	9	3	8	24	692200000	0.826	1		1011000000	1.008	2	50.1	129900000	1.307	1		3	6	4	6	13	5	0.1029	0.1722	0.122	0	1.67	1.68	3.35	418	47.3	5.88	3
IPI00942979.1	Transketolase	0.4864	5	11	20	99	894100000	0.826	11	13.3	795500000	0.787	14	25	3845000000	0.875	12	9.8	12	14	14	31	35	33	0.305	0.3788	0.4061	85.85	79.63	79.38	244.86	623	67.8	7.66	3
IPI00105598.3	Proteasome 26S non-ATPase subunit 11 variant (Fragment)	0.182	2	4	6	16	80860000	0.824	3	30.2	131700000	0.742	3	26.4	87370000	0.771	2	6.8	4	4	2	6	6	4	0.1158	0.1324	0.0662	4.6	6.54	5.26	16.4	423	47.5	6.48	3
IPI00514561.1	cDNA FLJ54552, highly similar to Heterogeneous nuclear ribonucleoprotein K	0.3855	7	7	13	51	461300000	0.824	6	11.4	429500000	0.808	7	17.5	5991000000	0.776	7	12.6	8	5	10	17	14	20	0.264	0.1799	0.3201	30.46	30.63	30.28	91.37	428	47.5	5.63	3
IPI00909657.1	cDNA FLJ50378, highly similar to Phenylalanyl-tRNA synthetase alpha chain	0.1363	2	2	5	12	132500000	0.823	2	53.1	197300000				113500000	0.713	1		4	2	2	5	2	5	0.1153	0.0503	0.0566	2	0	0	2	477	54.1	7.8	2
IPI00745502.2	26S protease regulatory subunit 8 isoform 2	0.1181	7	1	5	11	67410000	0.817	1		58820000	0.816	1		129300000	0.749	1		2	3	4	3	4	4	0.0628	0.0879	0.108	4.87	2.02	0	6.89	398	44.8	8.18	3
IPI00006451.7	Vesicle-fusing ATPase	0.2554	2	1	15	25	592500000	0.815	1		221000000	0.811	1		556700000	0.787	1		9	7	7	11	7	7	0.1667	0.1653	0.129	3.85	0	0	3.85	744	82.5	6.95	3
IPI00789370.3	serine hydroxymethyltransferase, mitochondrial isoform 3	0.2981	24	8	11	26	264100000	0.813	7	5.2	219300000	0.855	3	29.4	216500000	0.888	4	11.7	7	7	4	11	9	6	0.2381	0.1946	0.1118	10.23	4.21	3.98	18.42	483	53.4	8.15	3
IPI00790342.2	60S ribosomal protein L6	0.2526	5	2	8	18	3878000000	0.813	2	0.3	259000000	0.773	2	8.3	105600000	0.776	2	8.8	5	6	3	6	7	5	0.1972	0.2215	0.1419	4.21	3.59	7.51	15.31	289	32.9	10.58	3
IPI00003818.1	Kynureninase	0.1312	1	4	8	20	245500000	0.812	4	36.4	84780000	0.852	3	47.3	75800000	0.922	3	36.2	7	5	3	9	7	4	0.1312	0.114	0.0667	13.98	7.06	9.64	30.68	465	52.3	7.03	3
IPI00010157.1	S-adenosylmethionine synthase isoform type-2	0.1443	2	1	5	6	178300000	0.812	1		115800000				44190000	0.711	1		3	2	1	3	2	1	0.0937	0.0608	0.038	0	0	0	0	395	43.6	6.48	2
IPI00010471.6	Plastin-2	0.2329	3	6	9	17	65240000	0.811	5	13.3	55800000	1.004	2	18.3	71490000	1.015	5	14.5	5	3	6	7	4	6	0.1435	0.0702	0.1483	8.96	8.71	7.11	24.78	627	70.2	5.43	3
IPI00983652.2	cDNA FLJ61021, highly similar to Far upstream element-binding protein 1	0.1304	7	1	6	8	37360000	0.811	1		92750000	0.62	1		61100000	0.611	1		3	1	4	3	1	4	0.0477	0.0207	0.1033	0	0	0	0	629	66.2	7.56	3
IPI00032140.4	Serpin H1	0.3182	13	4	9	31	177800000	0.81	4	5.1	67570000	0.874	4	7.1	179500000	0.744	2	13.7	4	6	7	10	10	11	0.1651	0.2249	0.256	22.09	20.03	11.85	53.97	418	46.4	8.69	3
IPI00219005.3	Peptidyl-prolyl cis-trans isomerase FKBP4	0.3943	3	5	14	33	2983000000	0.81	2	5.6	171300000	0.622	4	13.2	265700000	0.537	3	7.4	8	9	6	11	13	9	0.2702	0.3333	0.2048	12.44	11.15	8.3	31.89	459	51.8	5.43	3
IPI00977833.1	Uncharacterized protein	0.3367	21	4	16	39	224100000	0.809	3	13.8	213700000	0.796	2	2.2	223500000	0.574	2	50.9	12	10	9	16	12	11	0.2775	0.2284	0.2335	15.43	13.2	14.88	43.51	591	65.7	9.64	3
IPI00005614.6	Isoform Long of Spectrin beta chain, brain 1	0.151	4	3	31	45	1503000000	0.809	2	34.2	1139000000				2049000000	0.524	1		16	8	13	19	9	17	0.0799	0.0491	0.0749	0	0	4.02	4.02	2364	274.4	5.57	2
IPI00852917.1	Uncharacterized protein	0.0624	4	1	3	5	41240000	0.808	1		18380000	0.572	1		15200000	0.611	1		2	2	1	2	2	1	0.0624	0.0541	0.0416	4.39	2.82	4.11	11.32	481	53	5.82	3
IPI00909232.1	cDNA FLJ53542, highly similar to Heterogeneous nuclear ribonucleoproteins C	0.4896	25	4	13	22	395400000	0.808	2	9	172100000	0.859	1		265500000	0.861	3	24.9	5	5	6	7	7	8	0.2431	0.2083	0.2083	0	0	0	0	288	32	8.72	3
IPI00003362.3	78 kDa glucose-regulated protein	0.5291	2	18	31	114	1459000000	0.806	17	13.4	1506000000	0.803	16	15.2	1546000000	0.805	12	12.5	19	24	21	37	43	34	0.3624	0.4679	0.3914	33.89	41.5	31.26	106.65	654	72.3	5.16	3
IPI00794900.3	cDNA FLJ56016, highly similar to C-1-tetrahydrofolate synthase, cytoplasmic	0.248	3	6	19	30	163000000	0.806	3	13.1	119900000	0.66	2	53.6	135900000	0.773	3	59.9	11	6	9	12	8	10	0.1578	0.0882	0.1206	9.06	7.88	8.81	25.75	1020	110.4	8.56	3
IPI00165579.6	Isoform 2 of Cytosolic non-specific dipeptidase	0.2583	3	3	8	14	91060000	0.805	1		338500000	0.65	2	24.8	79400000	0.695	2	17.4	3	4	4	4	5	5	0.1662	0.1483	0.1381	4.18	0	0	4.18	391	43.8	6.48	3
IPI00295485.4	Heat shock 70 kDa protein 4L	0.1359	4	1	8	13	53930000	0.805	1		58790000	0.491	1		52950000				3	5	4	3	5	5	0.0513	0.0989	0.056	2.4	5.43	2.62	10.45	839	94.5	5.88	2
IPI01012685.1	Uncharacterized protein	0.1201	7	2	5	9	62450000	0.803	2	14	61400000	0.609	1		22740000	0.83	1		3	3	2	4	3	2	0.0788	0.0807	0.0469	4.83	2.3	3.12	10.25	533	59.6	5.01	3
IPI00643196.1	cDNA FLJ35278 fis, clone PROST2006579, highly similar to 6-phosphofructokinase type C	0.3106	6	8	18	40	236400000	0.802	3	0.6	365000000	0.779	8	13.9	661500000	0.773	3	22.2	8	13	8	16	15	9	0.1559	0.2358	0.1418	18.22	11.74	11.71	41.67	776	85.3	8.59	3
IPI01015355.1	Uncharacterized protein	0.1261	5	4	6	17	587800000	0.802	2	4.6	164400000	0.82	3	13.2	86060000	1.008	2	19.6	6	4	3	8	5	4	0.1261	0.0972	0.0775	20.41	15.6	14.43	50.44	761	83.4	7.61	3
IPI00220834.8	X-ray repair cross-complementing protein 5	0.3525	2	9	18	71	226100000	0.801	11	10.4	194000000	0.793	11	17.3	411500000	0.795	8	16.3	13	11	11	23	25	23	0.265	0.25	0.2363	46.08	46.87	49.5	142.45	732	82.7	5.81	3
IPI00007765.5	Stress-70 protein, mitochondrial	0.408	7	13	26	92	622500000	0.8	8	13.9	437600000	0.75	11	4.4	679900000	0.745	9	6.9	21	15	17	33	30	29	0.3697	0.2622	0.2842	28.72	34.6	24.04	87.36	679	73.6	6.16	3
IPI00641992.5	Uncharacterized protein	0.1057	2	1	4	19	1134000000	0.8	1		1560000000	0.818	1		1090000000	1.03	1		3	2	3	6	5	8	0.0782	0.0506	0.0782	1.91	1.78	0	3.69	435	47.9	5.91	3
IPI00893361.1	Protein	0.2591	12	1	6	11	19650000	0.8	1		104900000	0.834	1		73980000	0.918	1		2	3	3	3	5	3	0.1053	0.1457	0.1498	3.41	4.63	2.64	10.68	247	27.9	9.77	3
IPI00910825.1	serine/threonine-protein phosphatase 2B catalytic subunit alpha isoform isoform 3	0.1898	16	1	7	27	1834000000	0.8	1		13850000	0.969	1		65360000				5	3	3	11	10	6	0.1045	0.0981	0.0789	0	0	0	0	469	52.6	6.23	2
IPI00465248.5	Isoform alpha-enolase of Alpha-enolase	0.6014	13	9	20	378	1433000000	0.799	19	29.9	1349000000	0.79	16	13.2	1473000000	0.77	20	22.2	15	13	14	127	122	129	0.4977	0.4931	0.4977	185.93	198.02	191.11	575.06	434	47.1	7.39	3
IPI00106668.5	perilipin-3 isoform 3	0.1019	3	2	3	8	100900000	0.798	1		62050000	0.661	1		70880000	0.67	1		3	2	1	3	3	2	0.1019	0.0664	0.0379	2.03	0	0	2.03	422	45.8	5.43	3
IPI00013808.1	Alpha-actinin-4	0.348	15	8	23	60	4025000000	0.796	5	27.3	392900000	0.884	6	35.8	3857000000	0.806	2	22.3	14	15	11	20	24	16	0.2294	0.2305	0.1855	19.84	16.3	9.85	45.99	911	104.8	5.44	3
IPI00783097.4	Glycyl-tRNA synthetase	0.23	1	5	12	21	76700000	0.794	3	11.4	128400000	0.956	3	26.6	175100000	1.057	4	14.3	6	6	5	7	6	8	0.1218	0.1231	0.088	14.11	5.52	6.05	25.68	739	83.1	7.03	3
IPI00922693.1	cDNA FLJ53662, highly similar to Actin, alpha skeletal muscle	0.309	48	1	12	82	11480000000	0.794	4	13.4	3268000000	0.757	4	4.3	3601000000	0.789	2	2.2	9	7	10	30	23	29	0.2799	0.2187	0.2653	14.07	13.1	11.19	38.36	343	38.6	5.38	3
IPI00018140.3	Isoform 1 of Heterogeneous nuclear ribonucleoprotein Q	0.2311	7	3	13	28	137400000	0.793	3	12.8	235400000	0.826	4	10.2	473000000	0.834	2	2.8	6	8	5	9	11	8	0.1236	0.1477	0.1075	10.14	10.08	9.03	29.25	623	69.6	8.59	3
IPI00382470.3	Isoform 2 of Heat shock protein HSP 90-alpha	0.4555	12	11	31	143	1897000000	0.788	15	14.2	2606000000	0.835	11	18.3	922400000	0.791	13	11.3	21	21	20	50	47	46	0.3185	0.3372	0.3138	63.68	61.02	49.62	174.32	854	98.1	5.16	3
IPI00844578.1	ATP-dependent RNA helicase A	0.1693	2	5	19	38	163700000	0.788	5	10.2	1061000000	0.8	2	6.5	188000000	0.863	3	2.3	7	10	7	11	16	11	0.0701	0.0961	0.0701	11.32	12.17	11.89	35.38	1270	140.9	6.84	3
IPI00013485.3	40S ribosomal protein S2	0.2355	7	1	5	14	47970000	0.787	1		55260000	0.842	1		102900000	0.851	1		3	5	2	4	7	3	0.1058	0.2355	0.0922	4.23	2.44	2.11	8.78	293	31.3	10.24	3
IPI00455383.4	Isoform 2 of Clathrin heavy chain 1	0.2727	7	23	36	80	1038000000	0.787	17	19	228100000	0.774	14	23.2	189500000	0.821	11	27.8	27	19	17	34	25	21	0.2105	0.1538	0.1464	41.99	40.26	33.97	116.22	1639	187.8	5.69	3
IPI00296053.3	Isoform Mitochondrial of Fumarate hydratase, mitochondrial	0.2255	2	3	9	16	57500000	0.786	3	19.6	245900000	0.752	2	18.2	82020000	0.799	2	12.9	4	6	4	4	8	4	0.1431	0.1431	0.1255	6.28	3.44	6.15	15.87	510	54.6	8.76	3
IPI00329801.12	Annexin A5	0.2594	6	4	6	27	257800000	0.785	4	10.8	178500000	0.857	4	3.9	256200000	0.915	5	39	5	3	5	8	8	11	0.2219	0.1344	0.2188	14.46	15.06	16.65	46.17	320	35.9	5.05	3
IPI00644079.4	cDNA FLJ44920 fis, clone BRAMY3011501, highly similar to Heterogeneous nuclear ribonucleoprotein U	0.3227	4	5	23	39	859500000	0.785	4	24.8	500500000	0.424	2	75.6	12710000000	0.734	3	63.5	12	8	13	14	11	14	0.2187	0.1533	0.2453	8.65	14.92	9.11	32.68	750	83	8.79	3
IPI00166749.3	Mitochondrial-processing peptidase subunit alpha	0.0648	2	1	2	9	41990000	0.785	1		35260000				38000000	0.77	2	8.4	1	2	1	3	3	3	0.0324	0.0648	0.0324	3.68	4.26	5.13	13.07	525	58.2	6.92	2
IPI00937471.1	Isoform 2 of Importin-5	0.1128	4	3	8	17	720900000	0.784	4	14.5	89590000	0.709	3	5.8	56680000	0.682	2	1.4	4	4	4	6	5	6	0.0636	0.0482	0.0714	7.67	7.6	11.91	27.18	1037	116.9	4.96	3
IPI00027230.3	Endoplasmin	0.3836	9	15	30	89	4085000000	0.783	10	7.9	804800000	0.754	9	15.3	1097000000	0.747	12	5.4	15	13	20	28	25	36	0.2217	0.2117	0.279	31.48	33.32	30.59	95.39	803	92.4	4.84	3
IPI00304925.5	Heat shock 70 kDa protein 1A/1B	0.3619	13	11	20	74	1139000000	0.783	8	11.8	999400000	0.75	10	5.5	745300000	0.834	10	14.7	13	15	12	26	26	22	0.2527	0.2949	0.2246	20.41	22.16	22.52	65.09	641	70	5.66	3
IPI00440493.2	ATP synthase subunit alpha, mitochondrial	0.4991	3	10	22	69	588400000	0.783	9	29.6	636100000	0.893	6	4.5	553400000	0.917	9	18.2	16	10	13	29	18	22	0.4069	0.2712	0.3418	42.47	35.9	35.01	113.38	553	59.7	9.13	3
IPI00936738.1	Isoform 1 of Torsin-1A-interacting protein 1	0.1338	5	3	6	10	40740000	0.783	1		756400000				656800000	0.708	1		3	2	1	6	2	2	0.0583	0.0549	0.0206	2.11	0	0	2.11	583	66.2	8.18	2
IPI00847300.1	Similar to Voltage-dependent anion-selective channel protein 1	0.2311	4	2	4	13	435600000	0.78	2	6.3	253300000	0.767	3	8.7	310000000	0.794	3	19	1	4	2	3	6	4	0.0797	0.2311	0.1315	1.73	0	0	1.73	251	27.7	9.22	3
IPI00165261.6	Sec1 family domain-containing protein 1	0.1464	5	1	8	18	61610000	0.779	1		162900000				215100000	0.618	1		3	6	4	4	8	6	0.0576	0.1246	0.0717	0	0	0	0	642	72.3	6.27	2
IPI00916535.1	prolyl 4-hydroxylase subunit alpha-1 isoform 3 precursor	0.1066	3	1	6	10	44020000	0.779	1		83480000				51790000	0.577	1		2	3	3	3	3	4	0.0465	0.0659	0.0756	4.2	0	7.19	11.39	516	58.9	6.02	2
IPI00005198.2	Interleukin enhancer-binding factor 2	0.3051	3	4	8	18	218400000	0.776	3	24.3	235200000	0.748	4	20	151100000	0.777	3	4.1	4	6	5	5	7	6	0.141	0.241	0.1821	6.98	8.49	9.27	24.74	390	43	5.26	3
IPI00219018.7	Glyceraldehyde-3-phosphate dehydrogenase	0.797	4	16	23	198	3777000000	0.775	30	15.6	6430000000	0.77	21	16.6	3525000000	0.768	24	17.2	19	14	12	74	56	68	0.7433	0.6687	0.5582	128.39	114.62	127.56	370.57	335	36	8.46	3
IPI00290142.5	CTP synthase 1	0.1201	3	1	6	15	423100000	0.774	1		304000000	0.77	2	22.3	292100000	0.728	2	11.2	2	6	3	2	9	4	0.0474	0.1201	0.066	3.8	6.95	4.66	15.41	591	66.6	6.46	3
IPI00414676.6	Heat shock protein HSP 90-beta	0.5428	14	14	35	142	2425000000	0.774	14	8.3	2606000000	0.785	14	8.2	1319000000	0.777	10	5.9	26	21	16	52	50	40	0.4503	0.4033	0.3108	55.37	61.18	50.41	166.96	724	83.2	5.03	3
IPI00917777.1	116 kDa U5 small nuclear ribonucleoprotein component isoform b	0.0779	4	2	5	10	89320000	0.773	1		66020000	0.812	1		41180000	1.037	2	32.2	3	3	2	4	3	3	0.047	0.0395	0.0309	1.91	2.05	7.39	11.35	937	105.3	5.22	3
IPI00023598.2	Tubulin beta-4 chain	0.5	14	2	15	77	984900000	0.77	3	6.7	810700000	0.863	1		678200000	0.819	2	9.9	13	12	11	27	25	25	0.464	0.4077	0.3964	34.8	41.06	37.56	113.42	444	49.6	4.88	3
IPI00983383.1	cDNA FLJ54904, highly similar to Homo sapiens dendritic cell protein (hfl-B5), mRNA	0.2645	4	1	7	21	881100000	0.77	2	9.8	1449000000	0.587	2	19.3	106900000	0.796	1		3	6	3	9	9	3	0.2025	0.2603	0.1818	5.08	0	0	5.08	242	27.8	6.89	3
IPI00013214.2	cDNA FLJ55599, highly similar to DNA replication licensing factor MCM3	0.2134	2	1	18	24	417600000	0.768	1		334900000	1.885	1		148700000	0.792	1		10	6	6	11	7	6	0.1313	0.0739	0.0785	3.51	3.26	3.35	10.12	853	95.8	5.77	3
IPI00027223.2	Isocitrate dehydrogenase [NADP] cytoplasmic	0.2343	4	6	8	22	127500000	0.767	4	9.6	109000000	0.699	5	8.6	771000000	0.827	6	11.2	5	6	6	6	7	9	0.1667	0.2005	0.1981	10.2	13.65	7.81	31.66	414	46.6	7.01	3
IPI00306290.5	Exportin-T	0.0832	1	2	6	15	94600000	0.767	2	5.2	69290000	0.779	1		60830000	0.741	2	13.3	5	3	4	6	3	6	0.0707	0.0437	0.0593	8.84	4.22	7.13	20.19	962	109.9	5.39	3
IPI00927101.1	Uncharacterized protein	0.2727	7	2	6	15	120500000	0.767	2	14.6	163100000	0.754	2	17.9	115200000	0.809	2	14	4	3	3	7	4	4	0.178	0.1705	0.1667	11.73	10.67	9.02	31.42	264	29.5	5.25	3
IPI00735181.2	Isoform 2 of Protein unc-45 homolog A	0.1356	2	1	10	18	206100000	0.767	1		251900000	0.698	1		117600000				4	5	5	6	7	5	0.0829	0.0775	0.0721	2.24	0	0	2.24	929	101.6	6.06	2
IPI00027834.3	Heterogeneous nuclear ribonucleoprotein L	0.2649	5	6	10	26	164400000	0.766	5	23.8	924900000	0.769	5	15.2	75120000	0.796	3	10.5	7	8	5	9	11	6	0.2156	0.2258	0.1732	6.42	6.3	4.17	16.89	589	64.1	8.22	3
IPI00305383.1	Cytochrome b-c1 complex subunit 2, mitochondrial	0.415	1	6	12	19	717600000	0.766	3	2.6	92160000	0.759	3	9.7	119800000	0.739	1		9	5	3	10	5	4	0.3179	0.1678	0.106	7.69	4.47	8.29	20.45	453	48.4	8.63	3
IPI00479186.7	Isoform M2 of Pyruvate kinase isozymes M1/M2	0.6252	7	18	29	235	1788000000	0.766	19	19.9	1229000000	0.702	23	17.5	1677000000	0.707	20	21.7	23	21	18	78	83	74	0.565	0.5179	0.4689	162	159.52	166.14	487.66	531	57.9	7.84	3
IPI00217966.9	Isoform 1 of L-lactate dehydrogenase A chain	0.6747	27	15	18	117	2311000000	0.765	17	14.9	1375000000	0.807	12	16.4	6095000000	0.735	17	18	14	9	14	41	37	39	0.5843	0.503	0.506	75.37	61.67	74.71	211.75	332	36.7	8.27	3
IPI00940148.1	Rab GDP dissociation inhibitor beta	0.4	6	3	16	63	387700000	0.765	3	2	4721000000	0.705	4	8.8	391300000	0.796	4	24.6	10	9	9	25	20	18	0.2697	0.2719	0.2584	55.21	56.17	42.45	153.83	445	50.6	6.47	3
IPI00100160.3	Isoform 1 of Cullin-associated NEDD8-dissociated protein 1	0.1024	3	5	9	24	141000000	0.763	5	14.5	97580000	0.695	3	21.2	292500000	0.68	3	15.2	5	4	5	8	7	9	0.0577	0.0463	0.0618	6.62	4.64	5.81	17.07	1230	136.3	5.78	3
IPI00037070.3	Uncharacterized protein	0.4757	18	10	20	85	1491000000	0.761	10	23.2	1383000000	0.815	13	13.3	1278000000	0.759	9	10.6	16	12	13	33	28	24	0.417	0.3563	0.3522	33.08	25.56	25.01	83.65	494	53.5	5.86	3
IPI00186290.6	Elongation factor 2	0.4814	4	22	36	178	1701000000	0.761	27	17.8	1045000000	0.758	22	17.2	2757000000	0.783	22	17.7	27	23	26	60	57	61	0.4266	0.3695	0.4452	110.71	107.54	104.59	322.84	858	95.3	6.83	3
IPI00642416.1	60 kDa SS-A/Ro ribonucleoprotein isoform 4	0.2008	5	1	10	20	264000000	0.76	1		57530000	0.747	1		75850000	0.706	1		5	4	6	8	6	6	0.1255	0.0946	0.1371	1.91	1.67	1.87	5.45	518	58.4	8.37	3
IPI00017672.4	cDNA FLJ25678 fis, clone TST04067, highly similar to PURINE NUCLEOSIDE PHOSPHORYLASE	0.1843	3	2	3	9	25710000	0.757	2	20.2	31210000	0.605	1		53230000	0.616	2	9.7	2	1	2	3	2	4	0.1331	0.058	0.1092	7.16	5.04	7.07	19.27	293	32.5	7.21	3
IPI00011200.5	D-3-phosphoglycerate dehydrogenase	0.2946	3	6	9	26	229100000	0.756	2	14.7	266000000	0.759	5	15.7	145500000	0.54	3	1.6	6	6	5	8	10	8	0.212	0.197	0.2026	11.05	19.64	15.61	46.3	533	56.6	6.71	3
IPI00916111.3	Malate dehydrogenase, cytoplasmic	0.3982	8	5	9	23	84340000	0.755	4	11.6	129600000	0.638	3	2.9	101900000	0.716	3	5.5	6	5	5	10	7	6	0.2725	0.2695	0.2635	10.01	12.34	6.88	29.23	334	36.4	7.36	3
IPI01011912.1	Phosphoglycerate kinase	0.7069	6	13	20	100	880700000	0.755	13	16.5	917600000	0.73	14	12.1	877800000	0.722	11	17.8	14	14	14	35	31	34	0.5681	0.5501	0.5656	77.69	70.45	66.67	214.81	389	41.4	7.33	3
IPI00797887.2	cDNA FLJ58199, highly similar to Fragile X mental retardation syndrome-related protein 1	0.2159	7	1	11	21	151800000	0.753	1		34840000				400100000	0.23	1		4	2	8	5	3	13	0.1221	0.0442	0.1593	3.34	6.01	6.03	15.38	565	63	6.77	2
IPI00291006.2	Malate dehydrogenase, mitochondrial	0.4763	3	8	12	40	563100000	0.752	5	10.2	588900000	0.668	7	32.8	496700000	0.635	5	16.9	7	11	5	12	16	12	0.3225	0.4763	0.2515	20.84	21.11	21.28	63.23	338	35.5	8.68	3
IPI00291510.3	Inosine-5'-monophosphate dehydrogenase 2	0.1654	3	2	8	14	100400000	0.752	2	48.1	51990000	0.951	1		205300000	1.426	2	56.5	4	3	5	4	3	7	0.0875	0.0759	0.1245	3.45	1.74	5.73	10.92	514	55.8	6.9	3
IPI00785208.1	Isoform 2 of Protein transport protein Sec24B	0.077	3	1	7	14	137100000	0.751	1		1228000000				1013000000	0.684	1		3	3	5	3	4	7	0.0324	0.0251	0.0519	0	0	4.39	4.39	1233	133.5	7.39	2
IPI00976200.1	adenosine kinase isoform c	0.2355	4	2	6	14	46020000	0.75	2	48.1	226000000	0.815	1		136600000	0.505	3	2.3	1	5	5	2	5	7	0.0765	0.2263	0.208	10.63	7.67	16.03	34.33	327	36.6	6.79	3
IPI00018931.6	Vacuolar protein sorting-associated protein 35	0.196	2	5	12	28	365700000	0.749	3	7.1	1036000000	0.416	3	71.4	86340000	0.747	3	4.7	4	8	8	7	11	10	0.0678	0.1369	0.1394	8.75	15.65	14.14	38.54	796	91.6	5.49	3
IPI00853455.1	Protein	0.153	6	3	4	11	57290000	0.749	2	44	56840000	0.758	2	10.9	44970000	0.56	2	80.5	2	3	3	3	4	4	0.0792	0.1055	0.1266	6.03	7.95	7.14	21.12	379	40.4	5.76	3
IPI00022774.3	Transitional endoplasmic reticulum ATPase	0.4082	3	13	23	68	590000000	0.748	8	13.3	462500000	0.709	11	20.4	451100000	0.727	9	21.8	13	15	17	22	22	24	0.2705	0.3077	0.3337	37.41	39.67	42.49	119.57	806	89.3	5.26	3
IPI01015385.1	Isocitrate dehydrogenase	0.245	3	3	9	14	73290000	0.748	2	2.8	246800000	1.018	1		39230000	0.781	2	12.7	5	5	3	5	6	3	0.14	0.13	0.095	4.08	8.38	3.49	15.95	400	45.2	7.75	3
IPI01021659.1	23 kDa protein	0.3535	24	2	6	16	6538000000	0.746	2	48.3	102800000	0.587	2	99.7	86620000	0.508	1		6	3	3	7	4	5	0.3535	0.2273	0.2273	2.1	4.47	4.71	11.28	198	23.4	4.81	3
IPI00014238.2	Isoform Cytoplasmic of Lysyl-tRNA synthetase	0.2395	2	1	13	22	185500000	0.745	1		89830000	0.659	1		67760000				6	4	6	8	6	8	0.1273	0.0921	0.124	5.45	1.94	3.61	11	597	68	6.35	2
IPI00645078.1	Ubiquitin-like modifier-activating enzyme 1	0.3582	9	19	24	102	571200000	0.742	16	17.3	584500000	0.693	17	9.3	552400000	0.721	13	16	15	17	15	34	37	31	0.2429	0.2665	0.2628	61.51	63.33	55.37	180.21	1058	117.8	5.76	3
IPI00646512.1	histone-binding protein RBBP7 isoform 1	0.162	5	1	5	8	45270000	0.742	1		60560000				12510000	1.392	1		2	3	2	3	3	2	0.1002	0.0682	0.0938	2.94	0	3.12	6.06	469	52.3	5.27	2
IPI00025491.1	Eukaryotic initiation factor 4A-I	0.399	13	7	13	33	175000000	0.741	3	6.6	1301000000	0.69	6	21.1	148800000	0.699	4	11	7	8	10	9	11	13	0.2488	0.2463	0.3547	7.91	1.83	10.98	20.72	406	46.1	5.48	3
IPI00156374.6	Isoform 1 of Importin-4	0.0823	3	3	7	13	172200000	0.741	2	28	54110000	0.695	1		213800000	0.7	2	7.6	4	3	4	5	3	5	0.0509	0.0315	0.0453	3.03	0	0	3.03	1081	118.6	4.96	3
IPI00007084.3	Calcium-binding mitochondrial carrier protein Aralar2	0.0889	3	1	5	8	577900000	0.741	1		547300000				332400000	0.802	1		3	3	2	3	3	2	0.0578	0.0459	0.0474	3.32	0	2.97	6.29	675	74.1	8.62	2
IPI00789551.1	Uncharacterized protein	0.2346	12	5	18	38	563800000	0.74	3	0.6	219500000	0.569	4	46.2	1131000000	0.75	5	12.2	8	7	12	13	9	16	0.1419	0.1318	0.1888	10.57	7.8	15.02	33.39	895	99.9	6.04	3
IPI00007928.4	Pre-mRNA-processing-splicing factor 8	0.1028	1	2	24	34	363600000	0.739	3	17.6	1621000000	0.975	1		79740000	0.817	2	21.1	10	11	9	12	11	11	0.0377	0.0522	0.0501	2.58	0	5.17	7.75	2335	273.4	8.84	3
IPI00955815.2	pyruvate dehydrogenase E1 component subunit alpha, somatic form, mitochondrial isoform 4 precursor	0.2061	5	1	6	11	58260000	0.739	1		53590000	0.739	1		32250000	0.816	1		3	4	2	4	5	2	0.1114	0.1421	0.0613	0	0	0	0	359	40.2	8.28	3
IPI00012837.1	Kinesin-1 heavy chain	0.1568	7	3	13	21	46750000	0.737	2	22.2	957000000	0.874	1		315500000	0.658	2	57.4	2	7	8	4	7	10	0.0301	0.0862	0.107	3.68	1.94	5.26	10.88	963	109.6	6.51	3
IPI00157790.7	proteasome-associated protein ECM29 homolog	0.1596	2	6	29	67	501400000	0.737	4	28.1	265500000	0.897	4	33.1	110500000	0.626	3	18.8	16	17	11	24	28	15	0.1031	0.1071	0.0798	9.26	12.12	10.47	31.85	2017	223.6	8.75	3
IPI00942143.2	cDNA FLJ51069, highly similar to DNA mismatch repair protein Msh2	0.1736	8	2	13	25	77720000	0.736	1		64060000	0.701	1		324300000	0.684	2	0.7	6	6	6	9	8	8	0.0958	0.1097	0.0819	12.08	6.13	9.06	27.27	720	81.3	6.57	3
IPI01013280.1	cDNA FLJ54090, highly similar to 4F2 cell-surface antigen heavy chain	0.0861	8	3	5	9	79840000	0.736	2	2.1	89090000	0.697	1		181400000	0.778	1		2	2	3	2	3	4	0.0489	0.0509	0.0568	0	2.5	2.03	4.53	511	55.9	5.17	3
IPI00021812.2	Neuroblast differentiation-associated protein AHNAK	0.1272	3	3	43	65	1496000000	0.735	1		208600000	0.706	1		213400000	0.854	1		20	18	16	25	22	18	0.0778	0.0645	0.0487	2.15	0	2.3	4.45	5890	628.7	6.15	3
IPI00001639.2	Importin subunit beta-1	0.1849	3	9	11	41	573800000	0.732	8	15.2	211000000	0.759	7	23.8	229200000	0.806	6	20.2	8	8	6	14	15	12	0.137	0.1484	0.1005	23.94	24.46	21.49	69.89	876	97.1	4.78	3
IPI01015917.1	T-complex protein 1 subunit delta	0.3805	5	7	12	17	151600000	0.731	3	35.2	206300000	0.713	3	22	149400000	0.53	1		5	6	4	6	7	4	0.1979	0.2134	0.1825	6.06	2.86	0	8.92	389	42.3	7.61	3
IPI00966877.1	tRNA (cytosine-5-)-methyltransferase NSUN2 isoform 2	0.1803	4	3	12	27	133200000	0.728	3	5.4	1943000000	0.783	2	22.7	312500000	1.019	1		4	8	4	10	10	7	0.0806	0.1339	0.0642	14.2	2.58	0	16.78	732	82.3	7.01	3
IPI00027497.5	Glucose-6-phosphate isomerase	0.3943	3	7	15	73	831200000	0.727	7	11.2	718100000	0.766	7	14	788900000	0.749	9	23.2	14	7	8	31	21	21	0.3638	0.2204	0.2455	54.08	63.11	58.09	175.28	558	63.1	8.32	3
IPI00604620.3	Nucleolin	0.3296	4	6	21	46	741700000	0.727	4	26.8	89990000	0.661	3	33.1	5586000000	0.708	5	18.5	12	6	9	18	11	17	0.238	0.1183	0.1803	28.37	21.13	27.48	76.98	710	76.6	4.7	3
IPI00028635.5	Dolichyl-diphosphooligosaccharide--protein glycosyltransferase subunit 2	0.0507	7	2	3	6	50310000	0.727	2	19.4	40540000	0.675	1		14940000				2	3	1	2	3	1	0.0396	0.0507	0.0206	3.44	0	0	3.44	631	69.2	5.69	2
IPI00030363.1	Acetyl-CoA acetyltransferase, mitochondrial	0.0913	3	1	3	9	112300000	0.727	1		64910000				115500000	0.738	1		2	2	2	3	3	3	0.0562	0.0562	0.0749	4.87	5.2	8.1	18.17	427	45.2	8.85	2
IPI00798400.1	Isoform D of Eukaryotic translation initiation factor 4 gamma 1	0.1951	21	5	23	33	130200000	0.726	2	4.5	810700000	0.764	1		843400000	0.594	3	3.7	10	10	10	11	10	12	0.0913	0.0976	0.1059	2.23	2.07	3.83	8.13	1435	158.4	5.21	3
IPI00301323.1	ATP-dependent RNA helicase DDX18	0.1672	3	1	10	22	45420000	0.726	1		274100000	0.67	1		291500000				3	6	6	4	12	6	0.0597	0.1179	0.1015	0	0	0	0	670	75.4	9.5	2
IPI00465439.5	Fructose-bisphosphate aldolase A	0.3874	2	8	11	69	1971000000	0.725	10	21.1	1852000000	0.69	8	21.3	1339000000	0.686	10	18	8	7	7	25	24	20	0.272	0.3297	0.2775	47.66	46.44	35.99	130.09	364	39.4	8.09	3
IPI00220740.1	Isoform 2 of Nucleophosmin	0.2566	4	2	4	10	27790000	0.724	2	10.4	31350000	0.91	1		242400000	0.875	1		3	1	2	3	2	5	0.2151	0.0528	0.0943	8.53	7.61	8.07	24.21	265	29.4	4.61	3
IPI00965117.2	peroxisomal multifunctional enzyme type 2 isoform 3	0.1518	7	1	7	13	82920000	0.724	1		70950000	0.805	1		155100000	0.744	1		4	3	5	5	3	5	0.0794	0.0599	0.1212	4.85	3.02	1.94	9.81	718	77.8	8.76	3
IPI01009629.1	cDNA FLJ51373, highly similar to 26S proteasome non-ATPase regulatory subunit 7	0.2672	2	3	4	9	39190000	0.721	1		85150000				141000000	0.764	2	0.5	2	2	3	3	2	4	0.1741	0.1093	0.1538	11.14	2.32	6.89	20.35	247	28.3	7.62	2
IPI00022143.3	Isoform 1 of Extended synaptotagmin-1	0.0507	3	1	5	13	4328000000	0.72	1		2190000000	0.633	1		48370000	0.707	1		4	3	4	5	4	4	0.0444	0.0263	0.0462	3.65	0	2.04	5.69	1104	122.8	5.83	3
IPI00219526.6	Isoform 1 of Phosphoglucomutase-1	0.3043	4	6	11	21	430500000	0.72	3	28.4	74320000	0.72	3	22.9	33690000	0.521	3	67	7	4	5	8	5	8	0.2028	0.0961	0.1744	9.01	7.18	20.34	36.53	562	61.4	6.76	3
IPI00784044.1	Isoform 1 of Methylcrotonoyl-CoA carboxylase beta chain, mitochondrial	0.1616	5	3	9	22	69920000	0.719	2	11	68950000	0.588	2	29.2	249300000	0.698	4	12.4	4	4	6	7	6	9	0.0835	0.0853	0.1403	13.03	7.54	13.39	33.96	563	61.3	7.68	3
IPI00829908.1	Isoform 2 of U2 snRNP-associated SURP motif-containing protein	0.1722	4	1	16	25	2054000000	0.719	1		520100000	0.948	1		115500000	0.784	1		5	9	5	5	12	8	0.0574	0.1099	0.0739	2.97	2.82	2.77	8.56	1028	118.2	8.47	3
IPI00843975.1	Ezrin	0.3191	4	4	18	36	597000000	0.718	4	3.5	624400000	0.801	4	6.3	1032000000	0.744	2	13.5	10	7	9	14	10	12	0.1962	0.1587	0.1877	14.03	11.63	9.13	34.79	586	69.4	6.27	3
IPI00916802.1	Uncharacterized protein	0.2798	5	4	9	20	119500000	0.717	3	12	80220000	0.989	2	13.8	54190000	0.579	4	14	6	3	6	9	4	7	0.1994	0.1191	0.1939	7.7	8.78	9.78	26.26	361	41.8	5.96	3
IPI00029012.1	Eukaryotic translation initiation factor 3 subunit A	0.2771	3	3	37	66	639100000	0.715	3	14.3	545100000	0.624	3	25.6	361000000	0.686	3	18.1	21	20	13	25	25	16	0.1404	0.1527	0.1433	11.52	13.27	10.97	35.76	1382	166.5	6.79	3
IPI00295851.4	Coatomer subunit beta	0.128	4	3	13	21	291200000	0.713	1		62480000	0.742	1		625100000	0.681	1		6	4	7	7	6	8	0.0577	0.042	0.0797	0	0	0	0	953	107.1	6.05	3
IPI00295857.7	Isoform 1 of Coatomer subunit alpha	0.1683	2	3	21	34	150700000	0.713	1		408100000	0.661	1		317300000	0.673	2	6.5	13	11	5	15	13	6	0.1087	0.1062	0.0466	2.07	2.12	0	4.19	1224	138.3	7.66	3
IPI00182373.2	Isoform IIa of Prolyl 4-hydroxylase subunit alpha-2	0.06	2	1	2	5	32620000	0.712	1		40580000	0.723	1		579000000	0.541	1		1	1	2	1	1	3	0.0356	0.0356	0.06	2.8	2.63	5.59	11.02	533	60.6	5.71	3
IPI00908723.1	cDNA FLJ61039, highly similar to Stomatin-like protein 2	0.0482	2	1	1	3	48870000	0.712	1		46450000	0.766	1		52370000	0.727	1		1	1	1	1	1	1	0.0482	0.0482	0.0482	2.97	3.65	3.25	9.87	311	33.3	8.25	3
IPI00010796.1	Protein disulfide-isomerase	0.315	5	8	11	63	617600000	0.71	10	10	310300000	0.681	8	4.6	981700000	0.593	7	26.4	8	6	8	22	22	19	0.2598	0.2087	0.2776	52.13	53.48	38.45	144.06	508	57.1	4.87	3
IPI00031522.2	Trifunctional enzyme subunit alpha, mitochondrial	0.2844	3	10	17	55	109900000	0.709	9	11.7	1199000000	0.694	7	25.5	1215000000	0.675	8	20.2	10	9	10	19	17	19	0.194	0.156	0.2005	29.83	30.56	31.43	91.82	763	82.9	9.04	3
IPI00021439.1	Actin, cytoplasmic 1	0.6507	50	8	19	289	14280000000	0.708	25	13.4	4576000000	0.724	23	14.5	6535000000	0.706	27	13.8	15	13	16	103	88	98	0.6373	0.5147	0.5867	207.68	204.69	212.21	624.58	375	41.7	5.48	3
IPI00926319.1	cDNA FLJ56112, highly similar to Dihydrolipoyl dehydrogenase, mitochondrial	0.1543	5	2	5	8	365900000	0.708	1		993000000				69330000	0.611	1		3	3	2	3	3	2	0.0885	0.0947	0.0679	0	1.63	0	1.63	486	51.8	7.96	2
IPI00966364.1	Uncharacterized protein	0.2259	5	2	4	56	382900000	0.704	2	3.3	661000000	0.827	4	33.8	436300000	1.012	2	6.8	4	4	3	19	17	20	0.2259	0.2259	0.1632	5.7	12.98	7.87	26.55	239	26.4	7.77	3
IPI00020632.4	Argininosuccinate synthase	0.48	5	8	14	55	1322000000	0.702	7	7.5	1247000000	0.73	7	16.8	1343000000	0.746	7	8.2	10	7	10	18	17	20	0.3578	0.2489	0.3711	45.32	51.16	42.45	138.93	450	50.8	8.4	3
IPI01010189.1	cDNA FLJ16143 fis, clone BRAMY2038516, highly similar to Protein disulfide-isomerase A6	0.3361	5	9	12	45	826300000	0.702	7	29.3	764500000	0.704	5	31.1	799400000	0.75	6	24.1	11	7	6	19	12	14	0.3156	0.2172	0.2029	17.15	17.24	13.81	48.2	488	53.2	5.53	3
IPI00002214.1	Importin subunit alpha-2	0.1078	1	1	6	11	245000000	0.7	1		176100000	0.7	1		94460000	0.629	1		4	3	2	5	4	2	0.0832	0.0851	0.0473	1.97	3.59	0	5.56	529	57.8	5.4	3
IPI00903145.1	Radixin	0.1732	9	2	8	14	506900000	0.695	1		712100000				619500000	0.406	2	64.6	5	2	6	5	2	7	0.1115	0.0429	0.1338	8.73	3.82	5.93	18.48	583	68.5	6.37	2
IPI00412742.1	Isoform 2 of Calcium-binding mitochondrial carrier protein SCaMC-1	0.1245	2	2	4	12	166400000	0.694	1		91740000	0.711	2	1.7	100900000	0.719	1		4	2	2	6	3	3	0.1245	0.0633	0.0633	7.63	6.25	6.52	20.4	458	51.3	5.88	3
IPI00009680.3	39S ribosomal protein L44, mitochondrial	0.0873	1	1	3	5	156700000	0.693	1		141300000	0.605	1		33600000				2	2	1	2	2	1	0.0873	0.0843	0.0392	0	2.15	0	2.15	332	37.5	8.4	2
IPI00012074.3	Isoform 1 of Heterogeneous nuclear ribonucleoprotein R	0.3333	5	2	16	24	2698000000	0.692	1		291400000	0.74	1		240300000	0.667	1		9	5	7	10	6	8	0.1896	0.1106	0.1517	5.72	5.66	6.45	17.83	633	70.9	8.13	3
IPI00642549.2	cDNA FLJ56531, highly similar to UV excision repair protein RAD23 homolog B	0.2109	4	3	5	10	95330000	0.691	3	1.7	119100000	0.402	1		175900000	0.627	1		3	3	2	3	4	3	0.1067	0.1514	0.1042	4.23	2.02	1.65	7.9	403	42.3	5.43	3
IPI00073772.6	Fructose-1,6-bisphosphatase 1	0.3935	2	6	10	31	274600000	0.69	4	16	260800000	0.656	4	23.5	618500000	0.737	5	17.2	7	4	8	12	7	12	0.287	0.1805	0.3225	14.96	19.82	13.96	48.74	338	36.8	6.99	3
IPI00925601.1	Uncharacterized protein	0.5601	7	17	23	74	367300000	0.69	13	12.1	404000000	0.714	16	31.2	252400000	0.725	10	26.1	17	19	13	26	29	19	0.4247	0.4738	0.357	35.44	37.24	27.54	100.22	591	64.5	6.71	3
IPI00297779.7	T-complex protein 1 subunit beta	0.471	5	8	17	42	209900000	0.686	7	26.8	201200000	0.871	7	24.7	214300000	0.672	7	27.1	11	8	13	16	10	16	0.3589	0.271	0.3701	30.17	20.23	23.94	74.34	535	57.5	6.46	3
IPI00830039.1	Isoform 2 of Splicing factor U2AF 65 kDa subunit	0.1486	2	2	6	10	41410000	0.686	2	13.3	69580000	0.656	1		99630000	0.473	1		3	3	1	5	4	1	0.0828	0.051	0.034	0	0	2.49	2.49	471	53.1	9.09	3
IPI00984839.1	ATP-dependent RNA helicase DDX3X isoform 2	0.1694	7	4	8	18	70210000	0.684	3	19	85320000	0.816	2	8.1	11880000000	0.626	3	15.3	4	4	6	5	5	8	0.0998	0.0832	0.1301	7.62	3.37	8.12	19.11	661	73.1	7.18	3
IPI00900305.1	Isoform 1 of Eukaryotic translation initiation factor 2 subunit 3-like protein	0.1928	3	2	5	9	56120000	0.684	1		237400000	0.814	1		49630000				2	4	1	2	5	2	0.0826	0.1631	0.053	3.09	7.24	6.25	16.58	472	51.2	8.4	2
IPI00910701.1	cDNA FLJ61339, highly similar to Alanyl-tRNA synthetase	0.2137	2	9	15	64	2485000000	0.683	11	17.3	161400000	0.718	11	15.7	165500000	0.732	11	8.8	12	9	9	23	20	21	0.1794	0.1452	0.1381	50.7	52.97	51.91	155.58	992	109.2	5.57	3
IPI00004860.2	Isoform Complexed of Arginyl-tRNA synthetase, cytoplasmic	0.2076	3	3	10	19	134500000	0.682	2	7.4	162500000	0.669	1		257700000	0.662	2	20.3	4	6	6	5	7	7	0.0818	0.1136	0.1288	3.37	1.6	2.37	7.34	660	75.3	6.68	3
IPI00012578.1	Importin subunit alpha-4	0.1593	2	1	7	11	13750000	0.68	1		347400000	0.52	1		10660000	0.727	1		1	5	3	2	5	4	0.0326	0.119	0.0729	0	0	3.81	3.81	521	57.9	4.96	3
IPI00514587.1	Uncharacterized protein	0.3414	2	9	17	53	160900000	0.68	7	13.9	150800000	0.673	7	7.8	165100000	0.74	9	12.3	10	11	12	16	20	17	0.2351	0.2575	0.2369	14.42	31.2	28.63	74.25	536	61.3	7.06	3
IPI00009532.5	cDNA FLJ56034, highly similar to 4-aminobutyrate aminotransferase, mitochondrial	0.1087	1	2	6	23	124600000	0.676	2	32.3	196900000	0.566	2	65.1	147200000	0.656	2	37.4	5	3	5	7	7	9	0.0951	0.0738	0.0874	6.62	4.89	5.4	16.91	515	58.2	8.09	3
IPI00219762.5	Uncharacterized protein	0.2273	6	8	12	36	222000000	0.676	6	16.8	123100000	0.654	6	1.4	584700000	0.665	7	4.4	7	7	8	13	11	12	0.1355	0.1541	0.1563	18.71	21.06	23.17	62.94	915	103.8	6.11	3
IPI01011937.1	Uncharacterized protein	0.1332	11	1	9	17	258200000	0.676	1		285100000	0.626	1		181900000	0.785	1		7	4	3	10	4	3	0.1046	0.0571	0.053	6.02	0	0	6.02	736	82.9	7.46	3
IPI00922838.1	cDNA FLJ56074, highly similar to 150 kDa oxygen-regulated protein	0.371	8	16	27	138	738500000	0.674	19	19.7	564600000	0.738	17	14.6	609500000	0.714	22	30.2	18	16	19	48	43	47	0.3058	0.2671	0.2936	72.13	70.31	78.1	220.54	981	109.6	6.14	3
IPI00619903.3	Isoform 2 of UDP-glucose:glycoprotein glucosyltransferase 1	0.0601	2	2	8	12	84650000	0.669	1		954900000				96480000	0.901	2	29.1	3	4	3	4	5	3	0.0268	0.047	0.0235	2.34	0	0	2.34	1531	174.9	5.6	2
IPI00000875.7	cDNA FLJ56389, highly similar to Elongation factor 1-gamma	0.3224	5	8	14	34	443100000	0.666	7	19	253200000	0.694	4	11.7	191200000	0.671	6	13.3	8	9	8	11	13	10	0.2115	0.2259	0.2505	7.29	10.13	7.07	24.49	487	56.1	7.72	3
IPI00853547.1	Isoform 3 of Glucose-6-phosphate 1-dehydrogenase	0.4954	6	17	22	131	2263000000	0.664	18	25.8	2626000000	0.79	20	17.9	494700000	0.72	16	30.3	15	17	14	45	43	43	0.4	0.4055	0.3761	66.69	69.41	65.94	202.04	545	62.4	8.05	3
IPI00908543.1	cDNA FLJ56133, highly similar to Serine/threonine-protein phosphatase 2A 65 kDa regulatory subunit A alpha isoform	0.227	12	6	9	43	115000000	0.663	5	9.5	137700000	0.771	7	7.3	105900000	0.722	7	27.4	7	8	7	14	16	13	0.1892	0.2036	0.1892	27.12	23.8	21.9	72.82	555	61.5	5.12	3
IPI01015136.2	cDNA FLJ51849, highly similar to Mitochondrial carrier homolog 2	0.1548	3	1	2	7	56310000	0.662	1		201300000	0.711	1		51300000	0.719	1		1	2	1	2	3	2	0.0903	0.1548	0.0903	2.13	1.83	4.01	7.97	155	17.2	7.46	3
IPI00009904.1	Protein disulfide-isomerase A4	0.431	1	10	20	60	478900000	0.661	7	20.3	1622000000	0.674	10	21.4	617700000	0.642	9	23.5	10	12	11	18	22	20	0.2031	0.2868	0.2341	20.52	21.62	17.42	59.56	645	72.9	5.07	3
IPI00300127.4	N-acetyltransferase 10	0.1024	2	2	7	16	64300000	0.658	2	19.1	47080000	0.632	1		77370000	0.407	1		3	5	4	4	7	5	0.0507	0.0761	0.0683	7.66	6.79	6.58	21.03	1025	115.7	8.27	3
IPI00293655.3	ATP-dependent RNA helicase DDX1	0.2	2	2	12	32	162400000	0.655	2	16.2	490800000	0.601	2	23	157900000	0.585	2	18.1	7	9	6	10	12	10	0.1446	0.1757	0.1365	5.77	4.21	6.43	16.41	740	82.4	7.23	3
IPI00514042.2	Isoform 2 of SWI/SNF-related matrix-associated actin-dependent regulator of chromatin subfamily D member 2	0.2647	4	1	13	22	215900000	0.655	1		48480000	0.683	1		350800000				7	4	8	9	5	8	0.1608	0.102	0.1608	2.49	3.56	0	6.05	510	57.2	9.32	2
IPI00930380.1	Serine/threonine-protein phosphatase	0.4201	17	3	6	23	363700000	0.653	1		811900000	0.468	2	52.3	1294000000	0.627	1		4	5	4	9	8	6	0.2426	0.3491	0.2367	8.57	12.55	5.55	26.67	169	19.6	5.92	3
IPI00718888.1	Isoform 2 of Ribose-phosphate pyrophosphokinase 2	0.1963	8	2	5	12	26780000	0.65	3	4.6	13810000	0.697	3	5.3	22800000	1.034	1		3	3	2	5	4	3	0.1184	0.1246	0.109	10.31	5.09	6	21.4	321	35	6.46	3
IPI00026089.4	Splicing factor 3B subunit 1	0.1442	1	1	18	29	1038000000	0.648	1		234300000	0.732	1		1537000000	0.641	1		5	9	9	6	12	11	0.0529	0.0821	0.0966	2.56	5.4	7.54	15.5	1304	145.7	7.09	3
IPI00383581.4	cDNA FLJ61290, highly similar to Neutral alpha-glucosidase AB	0.3729	7	15	27	95	532200000	0.648	14	29.7	357900000	0.612	15	32.5	244900000	0.65	11	25.1	20	18	15	35	33	27	0.2794	0.2905	0.2513	36.93	38.16	24.64	99.73	995	112.9	6.06	3
IPI00157908.4	Isoform 3 of Apoptosis-inducing factor 1, mitochondrial	0.3087	6	4	15	25	600300000	0.648	3	20.9	186200000				133900000	1.002	2	30.8	7	6	7	10	7	8	0.1675	0.1511	0.1544	2.28	3.5	0	5.78	609	66.3	8.94	2
IPI00382580.1	CDC42 GAP-related protein (Fragment)	0.1525	5	1	3	5	28490000	0.648	1		35450000	0.729	1		19920000				2	2	1	2	2	1	0.0852	0.1256	0.0583	2.01	2.66	0	4.67	223	25.2	9.23	2
IPI00375145.1	Isoform Short of Ubiquitin carboxyl-terminal hydrolase 5	0.1353	2	3	8	15	61510000	0.647	3	78.5	1252000000	0.545	2	28.4	36530000	0.46	2	33.7	4	6	3	5	7	3	0.0814	0.1102	0.0671	5.78	2.18	6.47	14.43	835	93.2	5.08	3
IPI00025874.2	Dolichyl-diphosphooligosaccharide--protein glycosyltransferase subunit 1 precursor	0.113	4	2	6	14	202000000	0.645	1		123400000	0.64	1		98730000	0.441	2	58.2	3	2	4	5	3	6	0.0619	0.0402	0.0759	1.67	4.86	6.34	12.87	646	72.7	6.28	3
IPI00009342.1	Ras GTPase-activating-like protein IQGAP1	0.1539	2	4	20	43	239400000	0.644	4	10.2	159700000	0.546	3	3.2	568100000	0.593	4	21.8	7	10	12	11	13	19	0.0628	0.0827	0.1056	9.59	8.29	11.88	29.76	1657	189.1	6.48	3
IPI00012268.3	26S proteasome non-ATPase regulatory subunit 2	0.2654	7	7	15	53	267900000	0.643	8	16.3	141200000	0.536	6	54.3	320500000	0.655	6	17.9	13	6	8	21	14	18	0.2313	0.1311	0.1608	21.52	17.24	22.83	61.59	908	100.1	5.2	3
IPI00039626.3	Isoform D of Constitutive coactivator of PPAR-gamma-like protein 1	0.0812	5	2	7	9	989100000	0.643	2	25.2	45570000	0.554	1		41360000	0.598	1		5	3	1	5	3	1	0.0588	0.0354	0.0131	2.38	4.45	0	6.83	1072	117.3	8.87	3
IPI00299506.9	Isoform 2 of Glucosamine--fructose-6-phosphate aminotransferase [isomerizing] 1	0.2291	4	7	12	45	131600000	0.643	7	52.2	120300000	0.931	6	22.1	144900000	0.837	5	10.6	8	8	8	14	15	16	0.1586	0.1806	0.1557	12.96	10.54	5.76	29.26	681	76.7	6.84	3
IPI00002966.2	Heat shock 70 kDa protein 4	0.2643	3	6	17	38	502100000	0.64	3	26.5	194800000	0.65	4	17.7	119000000	0.623	3	5.3	8	9	9	13	12	13	0.1524	0.1512	0.1393	18.22	22.21	20.62	61.05	840	94.3	5.19	3
IPI01009513.2	Uncharacterized protein	0.2056	4	4	13	26	374900000	0.64	3	37.7	161600000	0.676	2	6.7	96710000	0.681	3	16.3	8	5	8	12	5	9	0.1256	0.0889	0.1356	11.27	6.54	6.78	24.59	900	101.1	7.17	3
IPI00010810.1	Electron transfer flavoprotein subunit alpha, mitochondrial	0.3694	2	4	8	19	88510000	0.638	4	16.9	91290000	0.69	2	2.6	55830000	0.67	3	5.8	4	6	4	7	7	5	0.2462	0.3093	0.2162	10.53	4.54	8	23.07	333	35.1	8.38	3
IPI00893449.3	Uncharacterized protein	0.1801	5	1	17	25	4678000000	0.637	1		2495000000	0.735	1		1052000000	0.748	1		7	7	7	8	10	7	0.0732	0.0741	0.0826	2.06	4.21	2.37	8.64	1066	120.9	8.22	3
IPI00926977.1	26S protease regulatory subunit 10B	0.196	4	1	6	7	204000000	0.636	1		0				46670000	0.616	1		4		3	4		3	0.1266		0.1042	2.15		4.8	6.95	403	45.8	7.78	2
IPI00939370.1	CKAP4 protein (Fragment)	0.195	4	1	10	31	77410000	0.635	1		90570000	0.664	1		91390000	0.791	1		5	5	6	10	11	10	0.0983	0.1017	0.0983	2.44	2.03	1.7	6.17	600	67.8	9.31	3
IPI00013452.11	Bifunctional aminoacyl-tRNA synthetase	0.1938	3	6	24	30	286100000	0.633	2	0.4	380100000	0.634	2	53.5	597600000	0.653	1		11	9	6	12	11	7	0.0985	0.0827	0.0575	2.01	5.79	0	7.8	1512	170.5	7.33	3
IPI00005159.3	Actin-related protein 2	0.2005	4	3	6	11	52640000	0.631	1		43690000	0.661	1		65150000	0.689	2	1.8	2	4	2	3	5	3	0.066	0.1345	0.0584	0	0	0	0	394	44.7	6.74	3
IPI01014618.1	Uncharacterized protein	0.2897	14	3	5	9	82280000	0.631	2	33.5	95500000	0.693	2	25	43000000	0.848	1		3	2	2	4	3	2	0.1865	0.131	0.1389	8.77	8.41	5.1	22.28	252	29	8.85	3
IPI00329791.20	Probable ATP-dependent RNA helicase DDX46	0.2134	3	1	19	28	620900000	0.631	1		829600000				176000000	0.695	1		10	5	10	10	6	12	0.1183	0.0563	0.1174	0	0	0	0	1031	117.3	9.29	2
IPI00395676.1	Isoform 2 of UTP--glucose-1-phosphate uridylyltransferase	0.2133	3	2	8	15	42560000	0.631	1		261800000				737200000	0.604	2	3.3	3	3	6	3	4	8	0.1107	0.0805	0.1388	4.01	0	7.03	11.04	497	55.6	7.88	2
IPI00290566.1	T-complex protein 1 subunit alpha	0.3777	7	3	13	28	1155000000	0.63	2	0	177600000	0.967	1		92330000	0.6	1		9	5	7	10	8	10	0.2338	0.1313	0.2104	5.9	4.08	7.65	17.63	556	60.3	6.11	3
IPI00017895.3	Isoform 1 of Glycerol-3-phosphate dehydrogenase, mitochondrial	0.2022	5	3	11	18	241900000	0.629	2	58	85890000	0.466	3	183.7	63650000	0.614	2	44.3	6	6	4	7	6	5	0.121	0.1307	0.0949	12.63	6.93	3.62	23.18	727	80.8	7.69	3
IPI00216691.5	Profilin-1	0.3071	1	1	3	9	164900000	0.629	1		76350000	0.565	1		55760000	0.558	1		2	2	1	5	3	1	0.1929	0.2286	0.1143	4.58	4.51	2.37	11.46	140	15	8.27	3
IPI00026781.3	Fatty acid synthase	0.3449	2	41	54	197	1376000000	0.627	33	25.7	1205000000	0.613	27	35.4	1221000000	0.613	26	27	33	34	34	75	57	65	0.229	0.223	0.2186	133.38	100.26	101.72	335.36	2511	273.3	6.44	3
IPI00216770.1	Isoform 2 of 26S protease regulatory subunit 6B	0.385	2	1	9	16	66260000	0.627	1		69940000	0.669	1		160400000	0.72	1		4	3	5	6	4	6	0.1628	0.1395	0.2403	7.6	9.99	10.05	27.64	387	43.5	5.26	3
IPI00925572.1	asparagine synthetase [glutamine-hydrolyzing] isoform b	0.1241	8	3	5	17	113700000	0.627	4	5.4	48050000	0.626	3	2.6	28300000	0.841	2	13.5	3	3	3	7	6	4	0.087	0.087	0.0759	7.97	10.11	6.15	24.23	540	62.1	7.06	3
IPI00963899.3	cDNA FLJ38173 fis, clone FCBBF1000053, highly similar to HYDROXYMETHYLGLUTARYL-COA SYNTHASE, CYTOPLASMIC	0.1375	2	3	7	12	108000000	0.627	1		82070000				40220000	0.774	1		4	2	3	6	3	3	0.1061	0.0609	0.0707	3.36	3.8	6.88	14.04	509	56.2	5.41	2
IPI00179964.5	Isoform 1 of Polypyrimidine tract-binding protein 1	0.2486	5	6	9	63	342200000	0.623	11	13	313600000	0.63	8	10.3	1539000000	0.665	7	7.8	7	7	7	25	20	18	0.209	0.2147	0.209	46.33	50.75	53.19	150.27	531	57.2	9.17	3
IPI00909500.2	ubiquitin-like modifier-activating enzyme ATG7 isoform c	0.0433	7	1	2	6	415800000	0.622	1		116300000	0.198	1		26890000	0.476	1		2	2	1	3	2	1	0.0433	0.0433	0.0241	6.78	3.65	3.64	14.07	623	68.6	6.48	3
IPI00893179.1	X-ray repair complementing defective repair in Chinese hamster cells 6	0.4129	4	11	20	68	142100000	0.621	9	43.2	507600000	0.681	10	13.9	164200000	0.649	12	27.7	16	10	13	22	22	24	0.3573	0.2567	0.3052	26.23	29.38	26.68	82.29	557	64	6.83	3
IPI00394838.3	cDNA FLJ56442, highly similar to ATP-citrate synthase	0.2541	4	13	22	58	724900000	0.617	6	39.6	266800000	0.58	6	11.1	280100000	0.747	8	16.6	14	12	13	18	21	19	0.1581	0.1546	0.1817	18.77	19.82	22.05	60.64	1145	125.1	8.18	3
IPI00217871.4	Delta-1-pyrroline-5-carboxylate dehydrogenase, mitochondrial	0.2451	5	3	9	19	115300000	0.616	3	5	281400000	0.373	1		91840000	0.789	1		5	5	4	7	6	6	0.1456	0.1243	0.1172	8.71	5.52	9.08	23.31	563	61.7	8.07	3
IPI00000873.3	Valyl-tRNA synthetase	0.11	3	1	11	17	1424000000	0.616	1		25310000	0.402	1		977600000				5	4	5	7	5	5	0.053	0.0364	0.0585	4.97	4.33	0	9.3	1264	140.4	7.59	2
IPI00396485.3	Elongation factor 1-alpha 1	0.3398	7	5	13	63	1183000000	0.615	7	29.2	937200000	0.56	5	27.5	567600000	0.547	4	11.8	9	10	5	23	24	16	0.2749	0.3052	0.2035	45.05	39.2	40.68	124.93	462	50.1	9.01	3
IPI00947363.2	cDNA FLJ53366, highly similar to Probable ATP-dependent RNA helicase DDX5	0.2322	10	3	14	28	3534000000	0.61	2	16.5	367600000	0.586	2	21.9	669100000				7	8	6	9	11	8	0.1161	0.1808	0.0978	3.53	0	3.95	7.48	603	67.7	8.87	2
IPI00005969.3	F-actin-capping protein subunit alpha-1	0.2517	1	3	6	11	124300000	0.607	1		120600000	0.483	1		141300000	0.554	2	22.1	1	2	5	2	2	7	0.0629	0.0909	0.2238	0	0	1.66	1.66	286	32.9	5.69	3
IPI00014424.1	Elongation factor 1-alpha 2	0.2981	2	1	11	51	1138000000	0.605	4	8.3	638300000	0.572	3	16.6	470200000	0.588	4	10.4	6	7	5	19	17	15	0.2311	0.2613	0.203	50.29	38.14	40.69	129.12	463	50.4	9.03	3
IPI00783982.1	Coatomer subunit gamma	0.1693	3	6	11	35	145500000	0.598	6	43.8	68720000	0.707	5	88.3	133800000	0.858	4	14.5	8	7	7	13	11	11	0.1281	0.1178	0.1178	22.89	21.19	20.48	64.56	874	97.7	5.47	3
IPI00024403.1	Copine-3	0.1248	1	1	4	5	16230000	0.598	1		31660000	0.493	1		0				3	2		3	2		0.0912	0.0764		2.98	3.54		6.52	537	60.1	5.85	2
IPI00103467.5	Aldehyde dehydrogenase X, mitochondrial	0.2031	1	2	9	17	56170000	0.597	2	56.7	127100000	0.537	2	48.2	40470000	0.544	2	32.4	5	4	4	7	5	5	0.1199	0.1083	0.0986	6.12	4.83	2.93	13.88	517	57.2	6.8	3
IPI00978387.1	Uncharacterized protein	0.153	19	6	12	21	324500000	0.595	4	11.1	205900000	0.8	2	29.8	102200000	0.634	2	40.4	8	5	4	11	5	5	0.1104	0.0721	0.0536	8.27	0	3.85	12.12	915	102.9	5.6	3
IPI01014476.1	Aspartate aminotransferase	0.2857	3	4	7	25	1160000000	0.595	4	30.5	125900000	0.717	3	13.4	105100000	0.674	4	21.4	5	6	4	11	7	7	0.1964	0.2347	0.1633	8.86	4.3	11.26	24.42	392	44.1	8.07	3
IPI00413293.6	cDNA FLJ56343, highly similar to Torsin A	0.2033	2	1	7	11	12330000	0.594	1		17100000	0.767	1		33160000	0.399	1		2	3	5	2	4	5	0.0879	0.0769	0.1401	2.44	1.77	1.91	6.12	364	40.8	7.99	3
IPI00792848.3	Uncharacterized protein	0.1791	2	2	7	13	39480000	0.586	2	21.6	55490000	0.535	1		96430000	0.483	1		4	2	4	6	3	4	0.0796	0.0431	0.1244	1.66	0	0	1.66	603	68.9	8.18	3
IPI00644576.1	Uncharacterized protein	0.1926	11	13	33	61	1751000000	0.583	4	43.4	174200000	0.749	8	28.7	3045000000	0.694	6	18	15	18	17	15	22	24	0.1043	0.107	0.0909	14.92	7.85	11.14	33.91	2607	276.4	6.05	3
IPI00413014.4	inorganic pyrophosphatase 2, mitochondrial isoform 3 precursor	0.2284	7	1	4	7	67060000	0.582	1		57100000	0.382	1		63070000				2	3	2	2	3	2	0.1336	0.1638	0.1078	3.91	3.23	3.26	10.4	232	26	7.96	2
IPI00451401.3	Isoform 2 of Triosephosphate isomerase	0.2932	4	1	5	8	535700000	0.581	1		31720000	0.826	1		92450000	0.713	1		3	2	2	3	2	3	0.1647	0.1365	0.1124	2.75	2.14	5.09	9.98	249	27.1	8.24	3
IPI01014975.1	Uncharacterized protein	0.1079	2	3	24	38	1369000000	0.58	1		1659000000	1.011	1		506300000	0.741	2	12.9	9	11	10	12	13	13	0.0478	0.056	0.0626	0	5.35	4.6	9.95	2429	257.9	6.49	3
IPI00025273.1	Isoform Long of Trifunctional purine biosynthetic protein adenosine-3	0.0683	4	3	5	12	67590000	0.576	1		96180000	0.676	3	41.3	87070000	0.608	1		3	4	3	3	5	4	0.0604	0.0594	0.0515	4.83	11.65	7	23.48	1010	107.7	6.7	3
IPI00893703.1	Uncharacterized protein	0.1497	2	1	4	5	75050000	0.576	1		11710000	0.585	1		1023000				3	1	1	3	1	1	0.1123	0.0642	0.0856	0	0	0	0	187	21.3	10.27	2
IPI01013537.1	Uncharacterized protein	0.1422	5	2	5	9	89990000	0.574	1		17050000	0.498	1		21280000	1.744	1		4	2	1	5	3	1	0.1111	0.0644	0.0333	2.15	6.21	2	10.36	450	50.4	5.01	3
IPI00909008.1	cDNA FLJ51067, highly similar to DNA damage-binding protein 1	0.0882	6	1	6	13	94350000	0.573	1		48830000	0.441	1		50480000				5	4	1	6	5	2	0.0733	0.0694	0.0099	8.31	3.95	0	12.26	1009	111.9	5.22	2
IPI00029079.5	GMP synthase [glutamine-hydrolyzing]	0.1991	3	4	10	22	65170000	0.572	2	34.1	56280000	0.369	4	95.3	173800000	0.478	2	6.5	5	5	8	6	6	10	0.0895	0.1068	0.1501	4.65	11.54	7.83	24.02	693	76.7	6.87	3
IPI00464999.2	HEAT repeat-containing protein 6	0.0457	1	1	5	10	117100000	0.572	1		138200000	0.918	1		12720000	0.577	1		2	4	2	3	5	2	0.022	0.033	0.0229	2.09	2.46	2.84	7.39	1181	128.7	7.03	3
IPI00295992.4	Isoform 2 of ATPase family AAA domain-containing protein 3A	0.1997	6	1	14	22	3262000000	0.572	1		3201000000	0.466	1		137100000				6	5	7	8	7	7	0.1143	0.1058	0.1382	5.77	2.99	2.5	11.26	586	66.2	9.25	2
IPI00418262.5	Fructose-bisphosphate aldolase	0.2173	5	3	7	23	82660000	0.565	4	30.8	135000000	0.704	3	2	95470000	0.615	5	11.8	5	5	4	8	8	7	0.1663	0.1641	0.1641	6.94	7.07	6.61	20.62	451	48.4	8.07	3
IPI00643351.1	Protein	0.238	5	2	6	14	335500000	0.565	1		194800000	0.591	1		77410000	0.637	1		2	5	1	4	8	2	0.0802	0.2193	0.0775	2.76	0	0	2.76	374	42	10.43	3
IPI00027107.5	elongation factor Tu, mitochondrial precursor	0.2549	1	5	8	23	148100000	0.563	5	29.8	110100000	0.554	4	40.1	142100000	0.532	3	14.4	4	4	5	7	7	9	0.1451	0.1516	0.1758	8.27	10.32	8.52	27.11	455	49.8	7.61	3
IPI00218547.1	Isoform Short of Delta-1-pyrroline-5-carboxylate synthase	0.0782	2	3	4	13	158000000	0.559	3	20.6	53720000	0.746	2	11.9	45310000	0.598	1		3	3	2	5	5	3	0.0631	0.0605	0.0454	2.42	7.71	3.89	14.02	793	87	7.12	3
IPI01015219.1	cDNA FLJ52353, highly similar to 26S protease regulatory subunit 7	0.4054	2	3	10	23	288200000	0.559	1		150200000	0.507	1		229000000	0.661	2	39.1	5	6	7	7	7	9	0.2061	0.2365	0.3311	3.17	1.92	9.59	14.68	296	33.3	8.41	3
IPI00022228.2	Vigilin	0.1388	3	1	18	30	1946000000	0.559	1		252300000	0.601	1		340300000				9	9	5	10	13	7	0.0836	0.0647	0.0331	0	1.6	0	1.6	1268	141.4	6.87	2
IPI00185146.5	Importin-9	0.0384	1	1	2	5	9789000	0.557	1		8874000	0.397	1		9119000	0.794	1		1	2	1	1	2	2	0.0269	0.0384	0.0269	4.4	4.11	7.7	16.21	1041	115.9	4.81	3
IPI00010896.3	Chloride intracellular channel protein 1	0.112	1	1	2	8	342900000	0.554	1		77570000	0.346	1		199900000	0.209	1		2	1	2	3	2	3	0.112	0.0747	0.112	3.64	4.71	4.47	12.82	241	26.9	5.17	3
IPI00900293.1	filamin-B isoform 1	0.1139	9	2	18	23	231300000	0.554	1		271700000				73940000	0.438	1		7	7	8	7	8	8	0.0365	0.049	0.057	4.26	0	1.96	6.22	2633	281.5	5.71	2
IPI00014151.3	26S proteasome non-ATPase regulatory subunit 6	0.2159	5	3	8	11	119700000	0.552	1		54270000	0.681	2	44.9	93880000				5	3	3	5	3	3	0.1517	0.0925	0.1028	1.87	2.05	0	3.92	389	45.5	5.62	2
IPI00291175.7	Isoform 1 of Vinculin	0.1764	7	4	13	25	106400000	0.549	3	23.6	710400000	0.588	2	9.4	79920000	0.73	3	15.7	5	6	4	9	9	7	0.0779	0.0741	0.0666	7.07	5.55	6.29	18.91	1066	116.6	6.09	3
IPI00021187.4	Isoform 1 of RuvB-like 1	0.1689	5	2	9	15	270900000	0.548	1		138400000	0.715	1		56400000	0.617	2	8.2	4	3	5	4	4	7	0.0943	0.0592	0.1096	3.72	5.96	6.14	15.82	456	50.2	6.42	3
IPI00021700.3	Proliferating cell nuclear antigen	0.2912	1	3	5	10	81450000	0.541	2	33.2	148300000				142900000	0.703	1		2	1	4	3	1	6	0.1303	0.0307	0.2184	6.76	0	2.16	8.92	261	28.8	4.69	2
IPI00001159.11	Translational activator GCN1	0.0943	1	7	18	32	180600000	0.539	2	33	225700000	0.621	2	20.1	193500000	0.582	2	2.1	9	8	8	11	11	10	0.0562	0.0408	0.0502	7.07	6.3	4.75	18.12	2671	292.6	7.47	3
IPI00170935.1	Leucine-rich repeat-containing protein 47	0.1321	1	1	7	27	416100000	0.539	1		75650000	0.746	1		1753000000	0.649	1		5	4	4	7	9	11	0.1063	0.0926	0.0858	0	1.97	0	1.97	583	63.4	8.28	3
IPI00513743.1	Isoform 3 of Heat shock protein 105 kDa	0.2032	7	3	11	19	252600000	0.539	1		245800000				65120000	0.735	1		6	6	4	7	7	5	0.1028	0.1236	0.0698	4.59	4.06	1.9	10.55	817	92.2	5.4	2
IPI00218889.3	Isoform 2 of Dynamin-2	0.2968	8	3	19	27	5092000000	0.538	3	3.2	2734000000				469000000	0.587	1		8	11	5	9	12	6	0.1432	0.1594	0.0901	10.35	10.12	12.21	32.68	866	97.6	7.64	2
IPI00640357.1	ubiquitin carboxyl-terminal hydrolase 14 isoform b	0.1808	3	2	8	15	109200000	0.534	1		293800000	0.347	3	73.4	38620000	0.256	1		2	5	5	3	6	6	0.0806	0.1503	0.1329	4.81	2.18	6.73	13.72	459	52.4	5.78	3
IPI00456969.1	Cytoplasmic dynein 1 heavy chain 1	0.0915	1	2	38	69	3988000000	0.531	3	37	1674000000	0.555	1		3144000000	0.465	1		17	15	20	26	21	22	0.0517	0.037	0.051	5.06	5.29	0	10.35	4646	532.1	6.4	3
IPI00908495.1	cDNA FLJ60127, highly similar to Ubiquilin-2	0.0328	3	1	1	2	95430000	0.527	1		92800000	0.598	1		0				1	1		1	1		0.0328	0.0328		0	0		0	488	52.9	6.42	2
IPI00973816.1	40 kDa protein	0.4269	7	3	9	18	408900000	0.526	2	49.5	119900000	0.749	1		156700000	0.7	1		7	3	3	9	4	5	0.3266	0.1605	0.1117	9.09	3.12	2.47	14.68	349	39.8	5.57	3
IPI00927920.1	Uncharacterized protein	0.3676	4	1	2	4	42450000	0.524	1		19550000	0.442	1		50220000	0.549	1		1	2	1	1	2	1	0.2206	0.3676	0.2206	2.51	2.67	2.83	8.01	68	7.6	5.81	3
IPI00646721.1	Ubiquitin carboxyl-terminal hydrolase	0.1087	3	1	7	11	818900000	0.519	1		996700000	0.843	1		682500000	0.564	1		4	2	5	4	2	5	0.0737	0.0331	0.0681	0	0	2.63	2.63	1086	126.2	5.71	3
IPI00182757.10	Isoform 1 of Protein KIAA1967	0.1029	3	2	8	16	36120000	0.516	2	20.6	91860000	0.68	1		159400000	0.58	2	15.7	4	5	5	4	5	7	0.0563	0.0693	0.0618	2.31	2.36	5	9.67	923	102.8	5.22	3
IPI00008485.1	Cytoplasmic aconitate hydratase	0.1237	3	3	9	13	218800000	0.515	2	10.1	260300000	0.438	3	20.7	27670000	0.655	2	15.3	5	6	2	5	6	2	0.0742	0.0934	0.0382	5.19	7.15	4.75	17.09	889	98.3	6.68	3
IPI00946351.1	Uncharacterized protein	0.1228	5	1	5	18	503400000	0.512	2	7.8	178300000	0.501	2	5.5	241200000	0.57	2	13.8	2	2	4	6	5	7	0.0554	0.0623	0.1038	5.61	10.71	10.56	26.88	578	65.3	5.19	3
IPI00009328.4	Eukaryotic initiation factor 4A-III	0.3552	5	2	11	25	413800000	0.508	2	18.3	2005000000	0.676	4	7.2	205000000	3.246	1		7	5	5	9	9	7	0.2311	0.1849	0.1971	7.49	8.11	7.34	22.94	411	46.8	6.73	3
IPI00018398.4	26S protease regulatory subunit 6A	0.2164	8	3	9	17	464000000	0.504	2	29.4	36980000	0.502	2	33.7	971900000	0.926	2	40	4	2	6	6	3	8	0.1185	0.0706	0.1549	11.69	8	8.65	28.34	439	49.2	5.24	3
IPI01014693.1	cDNA FLJ56506, highly similar to Hexokinase-1	0.1814	7	4	14	31	249400000	0.498	2	41.1	132200000	0.766	1		315800000	0.378	1		8	9	9	9	12	10	0.1126	0.1104	0.1377	4.91	0	3.7	8.61	915	102.2	6.8	3
IPI00022648.2	Eukaryotic translation initiation factor 5	0.1578	2	1	6	9	132600000	0.495	1		61120000	0.623	1		48300000	0.715	1		2	3	3	2	3	4	0.0812	0.0905	0.0789	2.97	2.81	5.54	11.32	431	49.2	5.58	3
IPI00010154.3	Rab GDP dissociation inhibitor alpha	0.2707	3	3	10	34	301400000	0.492	2	5.2	321900000				316600000	0.711	2	12.1	6	4	8	12	10	12	0.1588	0.1119	0.226	26.73	28.88	19.85	75.46	447	50.6	5.14	2
IPI00956024.1	protein transport protein Sec23B isoform 2	0.0814	6	1	5	10	29400000	0.491	1		84950000	0.53	1		118300000				3	2	2	5	2	3	0.0494	0.032	0.0307	6.02	0	0	6.02	749	84.4	6.99	2
IPI00797038.1	Isoform 1 of Phosphoenolpyruvate carboxykinase [GTP], mitochondrial	0.2625	5	5	14	23	275000000	0.49	1		255500000	0.64	3	1.1	59790000	0.6	1		10	8	5	10	8	5	0.2297	0.1625	0.1	3.56	2.42	2.64	8.62	640	70.7	7.62	3
IPI00300371.5	Isoform 1 of Splicing factor 3B subunit 3	0.115	2	4	10	23	173900000	0.487	3	12.7	298700000	0.479	3	68.5	73550000	0.566	2	32	7	5	5	10	7	6	0.0855	0.0624	0.06	11.35	10.07	8.4	29.82	1217	135.5	5.26	3
IPI00337335.8	Isoform 1 of Myosin-14	0.1734	15	2	30	54	1180000000	0.484	1		579200000				528300000	0.626	2	24	16	11	15	17	14	23	0.0892	0.0772	0.0947	5.11	2.21	6.88	14.2	1995	227.7	5.6	2
IPI01011319.1	annexin A6 isoform 2	0.3432	12	5	17	35	228400000	0.478	3	4.4	62610000	0.502	3	17.6	471800000	1.109	2	40.9	11	8	8	14	10	11	0.2231	0.1825	0.1638	8.36	13.94	8.77	31.07	641	72.4	5.6	3
IPI00003968.1	NADH dehydrogenase [ubiquinone] 1 alpha subcomplex subunit 9, mitochondrial	0.0716	1	1	2	3	13440000	0.475	1		9603000	0.567	1		489900000				1	1	1	1	1	1	0.0345	0.0345	0.0371	0	0	0	0	377	42.5	9.8	2
IPI00895800.3	Isoform 1 of Inverted formin-2	0.1505	3	2	13	21	318300000	0.451	2	49.2	142500000	0.517	1		163100000	0.408	1		6	6	5	7	7	7	0.0592	0.0689	0.0689	5.23	2.89	2.44	10.56	1249	135.5	5.38	3
IPI00028031.2	cDNA FLJ56425, highly similar to Very-long-chain specific acyl-CoAdehydrogenase, mitochondrial	0.0956	4	1	5	7	152000000	0.446	1		78070000	0.383	1		45820000				2	3	2	2	3	2	0.0399	0.0528	0.0399	0	0	0	0	701	75.2	9.04	2
IPI00386208.1	Gastric-associated differentially-expressed protein YA61P	0.2132	1	1	2	4	1862000000	0.439	1		853600000	0.452	1		0				1	2		2	2		0.1103	0.2132		0	0		0	136	14.9	7.5	2
IPI00412737.1	tryptophanyl-tRNA synthetase, cytoplasmic isoform b	0.1791	5	2	5	15	266000000	0.436	1		254000000	0.372	1		51580000	0.764	2	104.7	2	3	4	4	6	5	0.0767	0.0977	0.1512	5.62	6.87	8.31	20.8	430	48.8	6.48	3
IPI00980391.2	cDNA FLJ54047, highly similar to Alpha-1 catenin	0.1145	13	2	8	18	17670000	0.431	1		27340000	0.498	1		32500000	0.542	2	18.8	1	4	6	2	5	11	0.0202	0.0584	0.0943	4.07	7.71	5.18	16.96	891	98.3	6.38	3
IPI00940744.1	NADH-ubiquinone oxidoreductase 75 kDa subunit, mitochondrial	0.216	6	2	12	24	439900000	0.425	1		349600000	0.546	1		403600000				5	7	6	8	8	8	0.0839	0.1486	0.1279	2.35	0	0	2.35	727	79.4	6.23	2
IPI00299402.1	Pyruvate carboxylase, mitochondrial	0.2029	3	6	17	30	501200000	0.415	3	38	367800000	0.751	3	63.6	437400000	0.61	2	16.1	7	11	6	10	13	7	0.0781	0.1384	0.0756	8.66	11.9	4.64	25.2	1178	129.6	6.84	3
IPI00219330.2	Isoform 5 of Interleukin enhancer-binding factor 3	0.1899	8	1	11	21	859500000	0.415	1		1381000000	0.239	1		86670000				6	8	3	7	11	3	0.1362	0.1333	0.0739	2.23	0	2.14	4.37	690	74.6	8.24	2
IPI00008530.1	60S acidic ribosomal protein P0	0.3502	13	4	7	25	244300000	0.414	3	3.3	222800000	0.592	4	39.6	165700000	0.46	3	4.8	4	5	4	7	11	7	0.2114	0.3312	0.2397	15.42	16.21	13.98	45.61	317	34.3	5.97	3
IPI00023234.3	SUMO-activating enzyme subunit 2	0.2156	3	3	10	15	650700000	0.396	1		44280000	0.626	1		139900000	0.918	2	51.3	7	2	4	8	2	5	0.1469	0.0656	0.1188	2.85	0	8.18	11.03	640	71.2	5.29	3
IPI00465436.4	Catalase	0.1082	1	2	5	6	37420000	0.384	1		20500000	0.518	1		80810000				1	2	3	1	2	3	0.0247	0.0398	0.0683	0	1.85	0	1.85	527	59.7	7.39	2
IPI00292771.4	Isoform 1 of Nuclear mitotic apparatus protein 1	0.2024	5	3	38	61	2552000000	0.377	2	69.4	219300000				1531000000	0.289	1		21	12	14	25	16	20	0.1381	0.0615	0.0804	0	0	0	0	2115	238.1	5.78	2
IPI00299904.3	Isoform 1 of DNA replication licensing factor MCM7	0.1335	5	2	8	11	298800000	0.346	1		116700000	0.395	1		32770000	0.626	1		5	3	2	5	3	3	0.0807	0.0542	0.0389	2.92	2.29	0	5.21	719	81.3	6.46	3
IPI00020984.2	cDNA FLJ55574, highly similar to Calnexin	0.2329	12	3	13	30	2182000000	0.328	1		238100000	0.453	3	15	90040000	0.875	2	141.3	7	10	5	10	15	5	0.1627	0.185	0.1132	3.23	3.05	3.08	9.36	627	71.5	4.7	3
IPI00021338.2	Dihydrolipoyllysine-residue acetyltransferase component of pyruvate dehydrogenase complex, mitochondrial	0.0989	4	2	6	28	219100000	0.309	1		18730000	0.85	1		21160000	0.405	1		4	3	2	10	11	7	0.0587	0.0587	0.0402	0	2.35	0	2.35	647	69	7.84	3
IPI00382990.1	DERP12	0.1924	1	2	6	9	132500000	0.307	1		96470000	0.328	2	9.4	59660000	0.299	1		2	3	3	2	3	4	0.0583	0.1108	0.0991	0	1.69	0	1.69	343	38.2	6.58	3
IPI00954180.1	Isoform 2 of Selenium-binding protein 1	0.2647	9	4	7	11	115400000	0.303	1		62140000	0.701	2	37.7	107300000	0.777	2	110.3	2	5	3	2	6	3	0.0833	0.1814	0.1152	2.01	0	0	2.01	408	45.3	6.42	3
IPI00554711.3	Junction plakoglobin	0.1315	1	2	7	13	184600000	0.255	1		0				113900000	0.331	2	4.1	4	1	5	5	2	6	0.0819	0.0148	0.106	0	0	0	0	745	81.7	6.14	2
IPI00015602.1	Mitochondrial import receptor subunit TOM70	0.1743	2	1	8	11	366400000	0.232	1		12770000	1.002	1		71160000				3	1	5	3	1	7	0.0526	0.0296	0.1217	4.58	4.16	0	8.74	608	67.4	7.12	2
IPI00220373.5	Insulin-degrading enzyme	0.0579	1	1	5	9	110700000	0.227	1		217900000	0.23	1		201400000				3	4	1	3	5	1	0.0334	0.0471	0.0137	2.59	2.18	0	4.77	1019	117.9	6.61	2
IPI00037448.3	Glyoxylate reductase/hydroxypyruvate reductase	0.2134	2	1	6	9	97140000	0.221	1		114200000				83830000	0.119	1		4	2	2	4	3	2	0.1768	0.1037	0.0854	1.93	8.1	3.16	13.19	328	35.6	7.39	2
IPI00328170.9	Mannosyl-oligosaccharide glucosidase	0.1027	2	3	5	10	31570000	0.143	1		72820000	0.445	2	117.1	85150000	0.292	2	80.3	3	3	3	3	4	3	0.0633	0.0609	0.0633	6.46	7.96	5.53	19.95	837	91.9	8.9	3
IPI00013122.1	Hsp90 co-chaperone Cdc37	0.3016	1	3	11	15	133700000				149300000	0.397	3	112.5	403900000	0.455	2	22.9	3	5	6	3	5	7	0.0503	0.2328	0.1667	0	3.02	3.38	6.4	378	44.4	5.25	2
IPI00021263.3	14-3-3 protein zeta/delta	0.2286	6	1	7	13	272000000				23970000	0.703	1		49130000	0.678	1		4	3	3	4	3	6	0.1102	0.1551	0.1388	0	4.57	4.32	8.89	245	27.7	4.79	2
IPI00026829.1	Isoform Long of Deoxyhypusine synthase	0.2168	3	2	6	10	258700000				26480000	0.343	1		27000000	0.599	1		4	4	2	4	4	2	0.1328	0.1463	0.0894	1.99	3.11	3.21	8.31	369	40.9	5.36	2
IPI00028083.1	Translation initiation factor eIF-2B subunit beta	0.2051	1	1	6	13	33740000				36380000	0.339	1		106100000	0.302	1		3	1	5	4	1	8	0.1282	0.0513	0.1909	1.92	2.05	2.2	6.17	351	39	6.16	2
IPI00033130.3	SUMO-activating enzyme subunit 1	0.1358	2	2	4	7	88130000				134800000	1.043	1		20060000	0.803	1		2	3	1	2	4	1	0.078	0.1301	0.0376	0	6.83	2.2	9.03	346	38.4	5.3	2
IPI00101782.3	Isoform 1 of Mannose-1-phosphate guanyltransferase alpha	0.1286	2	1	4	7	1462000000				43170000	3.833	1		17410000	0.478	1		2	2	2	2	3	2	0.0619	0.0643	0.0667	0	0	0	0	420	46.3	7.21	2
IPI00171626.3	Lysophosphatidylcholine acyltransferase 1	0.1648	1	1	7	26	5373000000				19500000000	0.429	1		19620000000	0.547	1		5	3	3	8	11	7	0.0861	0.103	0.0693	2.15	2.1	3.02	7.27	534	59.1	6.02	2
IPI00179057.6	Isoform 2 of Cullin-4B	0.1922	7	2	15	22	28790000				62540000	0.716	1		1024000000	0.591	1		6	4	9	7	4	11	0.067	0.0503	0.1251	0	0	1.78	1.78	895	102.2	7.94	2
IPI00216493.1	Isoform 3 of Heterogeneous nuclear ribonucleoprotein H3	0.3535	7	2	6	15	91720000				71030000	1.157	1		357500000	1.072	3	3.2	2	3	5	2	4	9	0.1717	0.165	0.2761	3.86	7.27	3.72	14.85	297	31.5	7.31	2
IPI00217670.1	Isoform 1 of Ribonucleoprotein PTB-binding 1	0.1799	3	1	7	16	83970000				1172000000	0.591	1		8500000	0.716	1		5	4	3	6	5	5	0.1386	0.0842	0.0479	0	1.62	4.36	5.98	606	63.8	8.48	2
IPI00217920.7	Isoform 1 of Aldehyde dehydrogenase family 16 member A1	0.1683	4	1	10	18	267800000				14040000	0.761	1		593900000	0.858	1		5	1	7	9	2	7	0.091	0.0162	0.1309	0	0	2.11	2.11	802	85.1	6.79	2
IPI00292387.6	Isoform Alpha of Nucleolar and coiled-body phosphoprotein 1	0.2618	3	1	14	22	107100000				150600000	0.992	1		157200000	1.145	1		4	7	6	6	9	7	0.0815	0.1445	0.103	0	2.45	2.26	4.71	699	73.6	9.47	2
IPI00296197.2	Nucleotide exchange factor SIL1	0.0889	2	1	4	6	25590000				85180000	1.91	1		47700000	1.682	1		2	2	1	2	2	2	0.039	0.0499	0.026	0	0	0	0	461	52.1	5.36	2
IPI00303207.3	ATP-binding cassette sub-family E member 1	0.0751	2	1	4	14	402600000				4155000000	2.138	1		17840000	0.891	1		1	4	1	2	11	1	0.0184	0.0751	0.0284	0	2.07	1.73	3.8	599	67.3	8.34	2
IPI00383296.5	Isoform 2 of Heterogeneous nuclear ribonucleoprotein M	0.4761	4	5	26	41	919400000				1144000000	0.731	3	1.2	2276000000	0.787	4	24.9	7	12	12	8	16	17	0.1317	0.1997	0.3314	9.55	4.26	4.89	18.7	691	73.6	8.82	2
IPI00413611.1	DNA topoisomerase 1	0.2288	1	1	19	28	226100000				139100000	0.877	1		167500000	0.48	1		10	6	7	11	9	8	0.149	0.0758	0.0967	2.14	2.18	1.62	5.94	765	90.7	9.31	2
IPI00453473.6	Histone H4	0.3883	1	1	3	5	74580000				47500000	0.529	1		1751000000	0.565	1		1	2	2	1	2	2	0.1165	0.2427	0.2621	0	0	0	0	103	11.4	11.36	2
IPI00456695.1	Isoform 2 of 26S proteasome non-ATPase regulatory subunit 1	0.0792	3	2	6	15	43100000				57260000	0.93	1		66400000	0.86	1		5	3	3	6	5	4	0.0662	0.0423	0.0477	2.14	0	2.29	4.43	922	102.2	5.27	2
IPI00470920.1	Serine/threonine-protein phosphatase 2A 55 kDa regulatory subunit B delta isoform	0.2075	10	1	7	23	9461000000				7103000000	0.886	1		691900000	1.062	1		3	5	5	8	8	7	0.1015	0.1589	0.1656	2.11	5.26	4.73	12.1	453	52	6.39	2
IPI00554798.2	Histone H2B type 1-M	0.4683	18	1	4	12	975200000				27380000	0.386	1		75830000	0.713	2	42.3	1	1	4	3	1	8	0.1032	0.119	0.4683	0	2.62	8.86	11.48	126	14	10.32	2
IPI00607814.4	xaa-Pro aminopeptidase 1 isoform 2	0.1651	4	2	7	9	112800000				303000000	0.978	1		35360000	0.356	1		1	4	2	1	5	3	0.0312	0.0966	0.0374	0	2.4	1.79	4.19	642	72.1	6.02	2
IPI00646114.2	cDNA FLJ57716, highly similar to 40S ribosomal protein S4, X isoform	0.2955	3	1	5	6	75280000				19750000	0.712	1		38850000	0.584	1		2	1	3	2	1	3	0.1212	0.0758	0.2273	0	0	0	0	132	15	10.13	2
IPI00784614.1	septin-9 isoform a	0.2116	8	1	11	18	64660000				186400000	0.402	1		808600000	0.418	1		4	4	6	4	7	7	0.1024	0.0887	0.1024	4.74	3.86	4.9	13.5	586	65.4	8.97	2
IPI00788157.1	Isoform 2 of 5'-3' exoribonuclease 2	0.1876	3	1	15	22	142000000				224000000	1.387	1		562500000	1.221	1		5	6	8	5	9	8	0.0515	0.0801	0.143	0	2.48	2.77	5.25	874	99.9	8.02	2
IPI00796919.2	Beta-galactosidase	0.1145	5	2	6	12	97700000				58780000	0.682	1		41860000	0.84	2	25.8	3	3	3	3	6	3	0.0538	0.0538	0.0566	0	0	2.53	2.53	725	81.8	7.94	2
IPI00807557.1	PA2G4 protein (Fragment)	0.2241	5	2	9	17	176200000				178700000	0.857	2	22.4	97990000	0.98	1		5	4	4	7	4	6	0.1379	0.1232	0.1108	0	1.75	0	1.75	406	45.1	8.95	2
IPI00844215.1	Isoform 1 of Spectrin alpha chain, brain	0.1618	4	2	35	79	1262000000				842900000	2.635	1		173500000	0.764	3	5.7	16	20	11	22	37	20	0.0922	0.0947	0.0526	1.73	13.93	14.59	30.25	2472	284.4	5.35	2
IPI00848226.1	Guanine nucleotide-binding protein subunit beta-2-like 1	0.2492	12	2	6	13	920000000				78250000	0.905	1		674200000	1.225	2	59.9	5	3	4	5	4	4	0.2208	0.142	0.1798	3.83	2.64	4.22	10.69	317	35.1	7.69	2
IPI00902560.1	Isoform 1 of Voltage-dependent anion-selective channel protein 2	0.1456	6	1	3	5	46500000				224200000	0.624	1		213800000	0.731	1		2	1	1	2	2	1	0.0809	0.0647	0.0647	0	0	0	0	309	33.4	7.59	2
IPI00910079.3	cDNA FLJ59418, highly similar to Mitochondrial inner membrane protein	0.2109	11	3	11	21	108600000				101600000	0.476	2	27.1	183100000	0.713	1		7	3	4	14	3	4	0.1244	0.0653	0.088	1.69	2.09	2.45	6.23	659	73.1	7.18	2
IPI00916847.1	47 kDa protein	0.1611	4	1	6	12	263700000				436700000	0.76	1		247900000	0.753	1		3	1	4	4	3	5	0.113	0.0361	0.0938	0	6.19	2.36	8.55	416	46.9	8.06	2
IPI00917733.1	cDNA FLJ10185 fis, clone HEMBA1004509, highly similar to U4/U6.U5 tri-snRNP-associated protein 2	0.1926	4	1	9	21	115700000				9165000	0.537	1		96250000	0.627	1		7	3	6	11	3	7	0.1516	0.0779	0.1373	1.76	0	1.98	3.74	488	56.3	9.38	2
IPI00977430.1	cDNA, FLJ79286, highly similar to T-complex protein 1 subunit gamma	0.346	6	5	15	18	109300000				177300000	0.745	3	5.1	326800000	0.78	1		4	8	5	4	8	6	0.092	0.22	0.104	0	1.61	0	1.61	500	55.6	5.64	2
IPI01012126.1	Thioredoxin domain containing protein	0.2185	3	2	5	9	148800000				161200000	0.881	2	13.8	243000000	0.851	1		2	4	1	2	6	1	0.0848	0.1851	0.0514	1.74	0	0	1.74	389	43.6	6.13	2
IPI01015286.1	cDNA FLJ53891, highly similar to Adenylosuccinate lyase	0.2434	5	1	4	8	152300000				151700000	0.758	1		155000000	0.81	1		3	2	3	3	2	3	0.2237	0.1283	0.148	1.78	1.92	1.72	5.42	304	34.5	7.08	2
IPI01015295.1	Uncharacterized protein	0.2649	3	4	13	19	293200000				27200000	0.622	1		84170000	0.349	3	89.8	4	6	7	5	6	8	0.0902	0.1363	0.1708	4.18	4.11	9.21	17.5	521	59.7	8.6	2
IPI01020665.1	Uncharacterized protein	0.1074	5	1	4	14	1018000				41930000	0.935	1		8652000	0.386	1		1	4	2	2	6	6	0.0379	0.1074	0.0674	0	3.81	1.98	5.79	475	51.4	7.8	2
IPI01022358.1	Alpha-tubulin	0.5457	28	2	15	92	1466000000				1350000000	1.086	1		1336000000	0.886	2	15	10	12	10	29	32	31	0.4135	0.4375	0.4111	75.29	64.01	85.55	224.85	416	46.3	5.08	2
IPI00017339.1	Splicing factor 3B subunit 4	0.0542	1	1	1	2	0				24200000	0.284	1		27360000	0.421	1			1	1		1	1		0.0542	0.0542		2.7	0	2.7	424	44.4	8.56	2
IPI00016450.3	Amiloride-sensitive sodium channel subunit gamma	0.0878	1	1	5	6	4441000000	75.386	1		35860000				94220000				2	3	1	2	3	1	0.0385	0.0493	0.0216	0	0	0	0	649	74.2	7.5	1
IPI00947553.1	Uncharacterized protein	0.114	6	1	3	5	52770000	4.109	1		17680000				33980000				3	1	1	3	1	1	0.114	0.0497	0.0497	3.48	2.38	2.14	8	342	37.6	8.09	1
IPI01009271.1	Isoform 1 of Protein FAM65C	0.1036	2	1	9	11	132700000	1.927	1		195300000				37770000				2	4	4	2	4	5	0.0243	0.0391	0.055	0	0	0	0	946	105.2	7.43	1
IPI00910932.1	cDNA FLJ54716, highly similar to Target of Myb protein 1	0.1167	8	1	6	7	29860000	1.349	1		93460000				19490000				2	2	2	2	2	3	0.0463	0.0529	0.0308	1.86	0	0	1.86	454	49.5	5.08	1
IPI01014238.1	cDNA FLJ53963, highly similar to Leukocyte elastase inhibitor	0.1994	2	1	4	5	28570000	1.202	1		42290000				226900000				1	2	2	1	2	2	0.0411	0.0704	0.129	2.22	0	2.91	5.13	341	38.7	6.67	1
IPI00550021.4	60S ribosomal protein L3	0.3151	3	1	12	14	49500000	0.95	1		150900000				277400000				5	5	4	5	5	4	0.1563	0.134	0.1092	0	0	2.98	2.98	403	46.1	10.18	1
IPI01018954.1	cDNA FLJ56214, highly similar to Trifunctional enzyme subunit beta, mitochondrial	0.1504	4	1	6	12	88140000	0.912	1		222100000				82810000				3	3	3	3	5	4	0.0929	0.0885	0.0553	0	0	0	0	452	48.8	9.17	1
IPI00984835.1	16 kDa protein	0.1019	4	1	1	1	39070000	0.885	1		0				0				1			1			0.1019			0			0	157	16.4	5.01	1
IPI00963851.1	23 kDa protein	0.3541	3	1	5	7	44640000	0.881	1		53570000				35120000				2	2	2	2	3	2	0.0957	0.1914	0.1196	0	0	0	0	209	22.6	7.43	1
IPI00013325.4	Protein FAM167B	0.0368	1	1	1	1	30680000	0.873	1		0				0				1			1			0.0368			0			0	163	18.4	5.41	1
IPI00947227.4	plastin-3 isoform 2	0.1095	5	1	5	5	59200000	0.858	1		263400000				75720000				2	1	2	2	1	2	0.0398	0.0199	0.0498	0	0	0	0	603	67.6	5.66	1
IPI00015953.3	Isoform 1 of Nucleolar RNA helicase 2	0.2478	2	2	18	24	836700000	0.856	1		460600000				227500000				9	7	4	11	9	4	0.1252	0.1022	0.0613	0	6.54	0	6.54	783	87.3	9.28	1
IPI00219504.1	Isoform 2 of Ubiquitin carboxyl-terminal hydrolase 15	0.1071	4	2	9	9	22600000	0.85	1		328100000				94520000				2	4	3	2	4	3	0.0221	0.042	0.0431	1.84	0	2.72	4.56	952	109.2	5.15	1
IPI00294610.4	Isoform 1 of DnaJ homolog subfamily A member 3, mitochondrial	0.1333	3	1	5	5	392600000	0.826	1		165500000				44550000				3	1	1	3	1	1	0.0875	0.0292	0.0167	0	0	0	0	480	52.5	9.26	1
IPI00002134.4	26S proteasome non-ATPase regulatory subunit 5	0.1429	2	1	6	8	239600000	0.823	1		240400000				11850000				2	4	2	2	4	2	0.0675	0.0873	0.0615	4.07	0	4.27	8.34	504	56.2	5.48	1
IPI01010320.1	Uncharacterized protein	0.1834	2	1	5	6	235300000	0.822	1		84920000				63940000				2	1	3	2	1	3	0.1073	0.0242	0.0761	2.61	0	0	2.61	289	32.7	4.86	1
IPI00984883.1	probable aminopeptidase NPEPL1 isoform 3	0.08	4	1	4	17	93910000	0.818	1		1081000000				0				3	2		8	9		0.0526	0.0484		0	0		0	475	50.5	6.52	1
IPI01015267.1	Uncharacterized protein	0.0841	2	1	4	6	257000000	0.811	1		49280000				12230000				3	2	1	3	2	1	0.0819	0.0376	0.0155	0	0	0	0	452	50.7	6.1	1
IPI00386755.2	ERO1-like protein alpha	0.1453	2	2	4	6	58730000	0.81	2	19.5	8443000				113300000				3	1	1	4	1	1	0.0855	0.0363	0.0598	1.68	1.74	0	3.42	468	54.4	5.68	1
IPI00456750.2	Isoform 2 of Niban-like protein 1	0.0846	4	1	7	14	31170000	0.781	1		12370000				137100000				2	4	5	4	4	6	0.0423	0.0505	0.0737	2.05	0	0	2.05	733	82.6	6.15	1
IPI00965964.3	Uncharacterized protein	0.0752	4	1	8	12	184400000	0.773	1		65530000				302000000				4	4	1	4	6	2	0.0354	0.0522	0.0062	0	0	0	0	1130	129.1	7.87	1
IPI00082310.1	Isoform 3 of KH domain-containing, RNA-binding, signal transduction-associated protein 1	0.1213	4	1	3	6	291300000	0.767	2	14.1	201900000				0				3	2		4	2		0.1213	0.0891		3.93	0		3.93	404	44	7.28	1
IPI00917192.2	cDNA FLJ58509, highly similar to Cullin-1	0.1622	3	1	10	15	648800000	0.756	1		658200000				567600000				5	3	4	5	6	4	0.0782	0.0398	0.0697	0	0	0	0	703	81.5	7.62	1
IPI00420108.6	Dihydrolipoyllysine-residue succinyltransferase component of 2-oxoglutarate dehydrogenase complex, mitochondrial	0.117	6	1	4	6	1918000000	0.732	1		30600000				0				3	1		5	1		0.0905	0.0265		3.88	0		3.88	453	48.7	8.95	1
IPI00289601.10	Histone deacetylase 2	0.0808	3	1	3	4	11110000	0.71	1		39300000				3113000				1	1	1	1	1	2	0.0292	0.0155	0.0361	0	0	0	0	582	65.5	6.99	1
IPI00246058.10	Programmed cell death 6-interacting protein	0.1417	2	2	8	18	79850000	0.707	1		4379000				198000000				5	2	4	6	6	6	0.1002	0.0346	0.0565	5.66	0	0	5.66	868	96	6.52	1
IPI00646055.3	Uncharacterized protein	0.1997	2	3	11	14	1196000000	0.69	2	1.8	3167000000				71540000				6	1	5	7	1	6	0.1029	0.0215	0.1152	0	0	2.06	2.06	651	74.2	7.87	1
IPI00470658.1	FBRNP	0.2788	4	1	6	10	47140000	0.687	1		37130000				20020000				5	2	3	5	2	3	0.2305	0.1004	0.1561	3.75	0	2.31	6.06	269	29.3	8.29	1
IPI00306960.3	Asparaginyl-tRNA synthetase, cytoplasmic	0.1588	2	2	6	7	45070000	0.684	1		112700000				76950000				3	2	2	3	2	2	0.0657	0.0602	0.0529	0	0	0	0	548	62.9	6.25	1
IPI00010706.1	Glutathione synthetase	0.1097	1	1	5	6	97780000	0.676	1		0				215900000				4		2	4		2	0.0823		0.0633	0		0	0	474	52.4	5.92	1
IPI00744711.2	Polyribonucleotide nucleotidyltransferase 1, mitochondrial	0.1584	3	1	10	15	46200000	0.674	1		24220000				3063000000				5	4	4	5	6	4	0.1009	0.0613	0.0409	3.09	0	0	3.09	783	85.9	7.77	1
IPI00218019.1	Isoform 1 of Basigin	0.1351	4	1	5	8	153600000	0.658	1		0				738300				4		2	5		3	0.0935		0.0597	1.8		0	1.8	385	42.2	5.66	1
IPI00013949.1	Small glutamine-rich tetratricopeptide repeat-containing protein alpha	0.0958	1	1	3	3	115200000	0.657	1		0				0				3			3			0.0958			1.87			1.87	313	34	4.87	1
IPI00796463.3	Isoform 2 of Protein dopey-2	0.0821	2	1	15	23	2313000000	0.644	1		714000000				77000000				7	7	5	7	10	6	0.0436	0.0402	0.031	0	0	0	0	2291	257.2	6.4	1
IPI00985353.1	Uncharacterized protein	0.1377	16	1	9	11	585600000	0.642	1		1821000000				215400000				5	2	3	6	2	3	0.0832	0.0273	0.0445	0	0	0	0	697	76.5	7.05	1
IPI01013382.1	cDNA FLJ53335, highly similar to Cytosolic purine 5'-nucleotidase	0.1241	5	1	8	10	132800000	0.626	1		113700000				0				4	3	2	5	3	2	0.0827	0.0658	0.0564	0	0	0	0	532	61.4	5.74	1
IPI00216172.2	lysosome-associated membrane glycoprotein 2 isoform C precursor	0.0852	4	1	3	5	44220000	0.617	1		69270000				50790000				1	1	3	1	1	3	0.0292	0.0341	0.0852	0	0	0	0	411	45.1	5.91	1
IPI00022479.6	Uncharacterized protein	0.0763	2	1	30	64	3065000000	0.607	1		509500000				496800000				10	16	11	20	25	19	0.0243	0.0422	0.0298	0	2.04	0	2.04	4862	532	6.04	1
IPI00218799.1	Isoform PLD1D of Phospholipase D1	0.1102	4	1	8	14	81370000	0.592	1		98820000				714000000				2	6	4	2	6	6	0.0463	0.07	0.0649	0	0	2.02	2.02	971	112.1	9.09	1
IPI00185398.5	Uncharacterized protein	0.178	3	2	7	8	27790000	0.588	1		4362000				53970000				2	2	4	2	2	4	0.0394	0.0472	0.115	2.7	0	5.19	7.89	635	71.8	7.14	1
IPI00003269.1	Beta-actin-like protein 2	0.2234	2	1	6	51	8696000000	0.587	1		4576000000				4452000000				6	5	3	24	14	13	0.2234	0.1729	0.1197	10.49	13.27	14.7	38.46	376	42	5.59	1
IPI00187011.4	Zinc finger CCCH domain-containing protein 4	0.1243	1	1	15	22	105900000	0.584	1		637900000				460200000				7	5	5	9	6	7	0.0744	0.0399	0.0422	0	0	0	0	1303	140.2	6.27	1
IPI00013847.4	Cytochrome b-c1 complex subunit 1, mitochondrial	0.1229	1	1	3	4	64230000	0.557	1		52860000				0				2	2		2	2		0.0938	0.0625		5.74	0		5.74	480	52.6	6.37	1
IPI00646047.1	cDNA FLJ43095 fis, clone CORDB2000541, highly similar to F-actin capping protein subunit beta	0.2885	4	1	4	6	135800000	0.539	1		90490000				0				2	3	1	2	3	1	0.15	0.1923	0.0769	0	0	0	0	260	29.2	5.99	1
IPI00937682.1	Uncharacterized protein	0.1974	5	1	7	15	250600000	0.531	2	23.2	84090000				6171000				4	3	2	8	5	2	0.1258	0.0868	0.0542	5.69	0	0	5.69	461	52.4	5.2	1
IPI00884341.2	Isoform 2 of Protein diaphanous homolog 1	0.1635	8	1	17	26	303800000	0.53	1		127400000				134200000				11	4	5	14	5	7	0.1226	0.0409	0.0473	0	0	0	0	1248	138.8	5.39	1
IPI00031420.3	UDP-glucose 6-dehydrogenase	0.1903	7	2	8	10	25580000	0.507	1		64110000				175800000				3	2	5	3	2	5	0.0911	0.0506	0.1255	3.55	2.55	2.67	8.77	494	55	7.12	1
IPI00798401.2	cDNA FLJ50992, highly similar to Coronin-1C	0.2243	5	1	8	12	65780000	0.505	1		115500000				55290000				3	3	3	4	5	3	0.0801	0.0526	0.1167	2.03	0	0	2.03	437	49.3	7.02	1
IPI00929553.1	Isoform 2 of ATPase family AAA domain-containing protein 1	0.1882	3	1	5	7	253400000	0.48	1		0				83850000				4		1	5		2	0.1463		0.0418	0		0	0	287	32.4	9.36	1
IPI00013933.2	Isoform DPI of Desmoplakin	0.1278	3	1	34	109	7832000000	0.475	1		26590000000				24580000000				13	18	13	38	47	24	0.0495	0.0724	0.0522	3.66	0	1.67	5.33	2871	331.6	6.81	1
IPI00909914.3	cDNA FLJ50884, highly similar to Beta-hexosaminidase alpha chain	0.1063	2	1	3	3	105200000	0.475	1		7217000				0				2	1		2	1		0.0664	0.0399		0	0		0	301	34.6	4.82	1
IPI00925317.1	Uncharacterized protein	0.1397	8	2	3	4	107600000	0.394	2	74.1	82240000				0				3	1		3	1		0.1397	0.0478		0	0		0	272	29.2	8.09	1
IPI00152981.1	Acyl-CoA dehydrogenase family member 9, mitochondrial	0.0773	2	1	5	8	45390000	0.358	1		594000000				317200000				1	2	2	2	3	3	0.0242	0.0354	0.0386	1.62	0	0	1.62	621	68.7	7.96	1
IPI01015489.1	cDNA FLJ60345, highly similar to Protein transport protein Sec24C	0.0851	3	1	7	12	170400000	0.342	1		1799000				211600000				4	3	2	4	5	3	0.0462	0.0503	0.0236	1.8	0	0	1.8	975	106.5	6.96	1
IPI00220684.1	Isoform 3 of Heterogeneous nuclear ribonucleoprotein D0	0.3137	10	1	7	10	440300000	0.315	1		4082000				195000000				5	1	3	6	1	3	0.2386	0.0523	0.1536	0	0	0	0	306	32.8	8.16	1
IPI00006725.2	Probable ATP-dependent RNA helicase DDX23	0.2085	2	1	22	37	242500000	0.303	1		233000000				318100000				9	8	11	12	9	16	0.122	0.0866	0.1024	0	0	0	0	820	95.5	9.55	1
IPI00790702.1	Uncharacterized protein	0.217	5	1	11	14	988100000	0.299	1		179100000				102800000				5	5	3	6	5	3	0.1159	0.0989	0.0466	2.41	2.26	2.76	7.43	880	98.1	5.24	1
IPI00908582.1	cDNA FLJ50164, highly similar to Protein flightless-1 homolog	0.1107	3	1	11	17	564000000	0.262	1		304500000				1111000000				7	4	4	8	4	5	0.0803	0.0482	0.0321	3.91	0	0	3.91	1183	135.1	6.13	1
IPI00015285.7	Ethanolamine-phosphate cytidylyltransferase	0.1722	3	1	5	8	24690000	0.255	1		60030000				375200000				3	2	2	3	2	3	0.1183	0.0566	0.054	0	0	0	0	389	43.8	6.92	1
IPI01012581.2	Uncharacterized protein	0.2332	5	1	10	19	36390000	0.202	1		87450000				239800000				6	4	2	13	4	2	0.1623	0.0881	0.0967	2.44	0	0	2.44	579	64.7	6.84	1
IPI00792916.2	glucosidase 2 subunit beta isoform 2	0.0876	2	1	5	11	360500000	0.031	1		131400000				0				4	3	2	5	3	3	0.0686	0.0552	0.0324	0	1.97	0	1.97	525	59.1	4.42	1
IPI00000581.6	cDNA FLJ56307, highly similar to Ubiquitin thioesterase protein OTUB1	0.2078	4	1	5	12	337700000				334100000				70560000	0.429	1		4	1	2	5	4	3	0.1591	0.0357	0.0844	0	0	2.09	2.09	308	35.2	5.59	1
IPI00008497.1	Ornithine decarboxylase	0.0759	1	1	4	4	136900000				107300000	0.541	1		0				1	3		1	3		0.0239	0.0521		0	0		0	461	51.1	5.26	1
IPI00009771.6	Lamin-B2	0.1823	1	3	11	22	204700000				18570000	0.628	1		228700000				6	4	6	8	7	7	0.0806	0.0774	0.1242	0	0	0	0	620	69.9	5.59	1
IPI00010604.4	Isoform 1 of 1-phosphatidylinositol-4,5-bisphosphate phosphodiesterase epsilon-1	0.1176	2	1	20	37	994300000				1194000000	16.708	1		322100000				8	12	8	10	13	14	0.051	0.0666	0.045	0	0	0	0	2312	259.8	6.51	1
IPI00011118.2	ribonucleoside-diphosphate reductase subunit M2 isoform 1	0.2249	8	2	7	10	1405000000				647600000				380600000	0.331	1		4	1	5	4	1	5	0.1292	0.0223	0.1537	0	0	4.07	4.07	449	51.1	6.57	1
IPI00011619.4	Bifunctional 3'-phosphoadenosine 5'-phosphosulfate synthase 1	0.0673	1	1	3	4	3878000				3598000	0.393	1		0				2	2		2	2		0.0561	0.0385		2.53	1.95		4.48	624	70.8	6.86	1
IPI00014053.3	Isoform 1 of Mitochondrial import receptor subunit TOM40 homolog	0.0886	1	2	4	9	66240000				107100000				61010000	0.644	1		2	3	3	3	3	3	0.0859	0.0886	0.0859	0	0	0	0	361	37.9	7.25	1
IPI00016801.1	Glutamate dehydrogenase 1, mitochondrial	0.2007	6	2	11	34	152100000				819400000				5192000000	0.522	1		3	4	8	9	11	14	0.0645	0.052	0.1649	0	0	0	0	558	61.4	7.8	1
IPI00022790.2	Microfibrillar-associated protein 1	0.1002	1	1	6	11	365700000				75470000	0.874	1		41300000				4	4	1	6	4	1	0.0866	0.0797	0.0137	0	0	0	0	439	51.9	4.98	1
IPI00024580.4	Methylcrotonoyl-CoA carboxylase subunit alpha, mitochondrial	0.1903	3	1	11	19	847200000				46010000	0.853	1		36480000				5	5	4	8	6	5	0.08	0.0855	0.0676	0	2.27	0	2.27	725	80.4	7.78	1
IPI00024642.2	Isoform 1 of Coiled-coil domain-containing protein 47	0.176	2	1	6	8	46950000				4495000	0.198	1		57540000				4	1	3	4	1	3	0.1325	0.0373	0.0807	0	0	0	0	483	55.8	4.87	1
IPI00026314.1	Isoform 1 of Gelsolin	0.1343	7	1	9	15	754400000				458600000				193700000	0.65	1		2	6	3	2	8	5	0.0281	0.101	0.046	0	0	0	0	782	85.6	6.28	1
IPI00029133.4	ATP synthase subunit b, mitochondrial	0.1484	1	1	3	6	162900000				0				8697000	0.404	1		2		2	4		2	0.0898		0.0898	0		0	0	256	28.9	9.36	1
IPI00029764.1	Splicing factor 3A subunit 3	0.1357	2	1	8	17	462300000				147500000				290700000	0.782	1		2	3	5	2	7	8	0.0379	0.0439	0.0878	0	0	0	0	501	58.8	5.38	1
IPI00032304.2	Plastin-1	0.097	1	1	5	5	239600000				0				2642000	0.445	1		3		2	3		2	0.0445		0.0525	0		1.62	1.62	629	70.2	5.41	1
IPI00063408.8	Probable 2-oxoglutarate dehydrogenase E1 component DHKTD1, mitochondrial	0.1077	3	1	8	16	357900000				18420000				20220000	0.606	1		4	1	5	5	3	8	0.0588	0.0141	0.0871	0	0	0	0	919	103	6.93	1
IPI00090327.1	Vacuolar protein sorting-associated protein 45	0.0982	2	1	5	12	65210000				59580000	0.993	1		19750000				3	4	1	5	6	1	0.0702	0.0877	0.0228	0	0	0	0	570	65	8.24	1
IPI00097321.9	Zinc finger protein 354C	0.0722	1	1	4	6	1091000				170900000				531600000	0.717	1		1	3	2	1	3	2	0.0307	0.0415	0.0397	0	0	0	0	554	64.8	8.05	1
IPI00099650.2	Protein jagged-1	0.0755	2	1	10	24	31560000				1217000000				39360000	1.935	1		2	6	4	3	10	11	0.0156	0.055	0.0501	0	0	0	0	1218	133.7	6.06	1
IPI00103630.3	Isoform 2 of Protein phosphatase 1E	0.0927	3	1	7	10	1004000				212000000	1.094	1		27300000				1	5	3	1	6	3	0.0185	0.0702	0.0344	0	0	0	0	755	83.9	5.01	1
IPI00178649.9	Isoform 4 of MMS19 nucleotide excision repair protein homolog	0.0697	6	1	5	5	1310000000				287600000				23090000	0.609	1		1	1	3	1	1	3	0.015	0.0118	0.0429	0	0	0	0	932	102.6	6.4	1
IPI00184262.6	Isoform 3 of Epithelial splicing regulatory protein 1	0.1846	9	2	9	9	62780000				95020000				131800000	0.684	2	25.7	2	3	4	2	3	4	0.0295	0.0635	0.1034	0	0	2.21	2.21	677	75.1	6.58	1
IPI00184330.5	DNA replication licensing factor MCM2	0.135	3	1	12	20	1006000000				45790000	0.581	1		234500000				6	5	5	9	6	5	0.0653	0.0542	0.0597	0	0	0	0	904	101.8	5.52	1
IPI00217143.4	Uncharacterized protein	0.1272	5	1	7	13	117200000				110500000	1.658	1		175700000				3	4	3	3	5	5	0.0617	0.106	0.0809	0	2.03	0	2.03	519	56.6	7.5	1
IPI00218570.6	Phosphoglycerate mutase 2	0.3478	7	1	7	13	43700000				231700000	0.69	1		96190000				3	6	3	3	7	3	0.1462	0.3083	0.1858	1.81	2.51	2.29	6.61	253	28.7	8.88	1
IPI00219065.2	Isoform 5 of Glycogen debranching enzyme	0.0469	3	1	9	15	264400000				46480000	0.719	1		27350000				4	4	4	5	4	6	0.0257	0.029	0.0271	0	2.56	0	2.56	1515	172.5	6.71	1
IPI00219970.3	Isoform 4 of Uncharacterized protein C20orf26	0.0442	5	1	6	6	60910000				0				327000000	1.038	1		2		4	2		4	0.0195		0.0331	0		0	0	1177	134.5	6.15	1
IPI00220271.3	Alcohol dehydrogenase [NADP+]	0.1385	1	2	3	3	12000000				0				13290000	0.775	1		1		2	1		2	0.0369		0.1015	0		4.13	4.13	325	36.5	6.79	1
IPI00220967.1	Isoform 1 of Ribosome-binding protein 1	0.1365	5	1	14	21	126800000				183100000				150300000	0.738	1		7	6	5	7	7	7	0.0654	0.0618	0.054	0	1.82	5.24	7.06	1407	152.1	8.66	1
IPI00221285.5	Ankyrin repeat domain-containing protein 50	0.14	2	1	15	17	32270000				5347000000				1011000000	6.076	1		2	5	8	2	5	10	0.021	0.0525	0.0665	0	0	0	0	1429	155.8	6.6	1
IPI00260715.5	Fus-like protein (Fragment)	0.2008	4	1	8	27	229400000				314000000	0.891	1		242400000				5	5	4	8	14	5	0.1458	0.1591	0.0928	0	0	0	0	528	53.3	9.42	1
IPI00291419.6	cDNA FLJ53975, highly similar to Acetyl-CoA acetyltransferase, cytosolic	0.108	2	1	5	8	60240000				66200000	1.014	1		54160000				2	3	2	2	3	3	0.054	0.0845	0.0516	0	2.08	0	2.08	426	44.6	8.46	1
IPI00293350.3	Translin-associated protein X	0.4414	1	1	11	26	140000000				571300000	0.346	1		809000000				7	4	5	10	9	7	0.2483	0.1621	0.2241	0	0	0	0	290	33.1	6.55	1
IPI00297084.7	Dolichyl-diphosphooligosaccharide--protein glycosyltransferase 48 kDa subunit	0.1316	2	1	3	3	64250000				0				69050000	0.557	1		2		1	2		1	0.1075		0.0241	2.98		0	2.98	456	50.8	6.55	1
IPI00299177.4	Isoform 1 of Cat eye syndrome critical region protein 5	0.1221	3	2	4	6	1485000				71620000	0.438	2	38.9	29820000				1	3	2	1	3	2	0.0331	0.0941	0.0611	0	0	1.8	1.8	393	43.6	6.9	1
IPI00306661.3	E3 ubiquitin-protein ligase KCMF1	0.0919	1	1	3	4	2807000				12060000	2.166	1		1314000000				1	2	1	1	2	1	0.0184	0.0551	0.0367	0	2.3	0	2.3	381	41.9	5.66	1
IPI00334174.3	Isoform 2 of Ras-related protein Rab-1A	0.3121	6	1	3	5	88830000				108300000	0.601	1		53120000				1	2	2	1	2	2	0.1064	0.2057	0.2057	0	2.35	2.27	4.62	141	15.3	8.13	1
IPI00334291.9	Lon protease homolog	0.1289	2	1	11	11	13580000				935900000	0.801	1		32120000				2	6	3	2	6	3	0.0314	0.0813	0.0325	0	0	0	0	923	103	6.67	1
IPI00395817.1	Isoform 2 of Uncharacterized protein C9orf9	0.1548	2	1	3	18	5525000000				4002000000				5336000000	0.244	1		2	3	2	5	6	7	0.1429	0.1548	0.1429	0	0	0	0	168	19.3	7.52	1
IPI00410693.4	SERPINE1 mRNA binding protein 1, isoform CRA_d	0.3183	4	1	11	18	26930000				79590000				596000000	0.391	1		4	5	3	6	7	5	0.1183	0.1376	0.1011	0	0	5.6	5.6	465	50.9	9.33	1
IPI00418497.1	Isoform 2 of Mitochondrial import inner membrane translocase subunit TIM50	0.1908	2	1	7	10	549000000				100800000	0.427	1		84900000				5	2	2	6	2	2	0.125	0.057	0.0614	0	0	0	0	456	50.4	9.42	1
IPI00419531.2	Cleavage and polyadenylation specificity factor subunit 2	0.156	1	1	11	26	171400000				1035000000	1.469	1		816300000				4	7	4	5	12	9	0.0754	0.1189	0.046	0	0	0	0	782	88.4	5.11	1
IPI00427586.4	Isoform Alpha of cGMP-dependent protein kinase 1	0.1788	2	1	9	27	793100000				434900000	0.867	1		408800000				5	6	7	7	9	11	0.0984	0.1148	0.1341	0	0	0	0	671	76.3	6.04	1
IPI00429689.3	Serine/threonine-protein phosphatase 2A catalytic subunit beta isoform	0.1683	5	2	5	5	1978000000				38890000	0.538	1		200400000				2	2	1	2	2	1	0.0453	0.0809	0.0421	0	0	0	0	309	35.6	5.43	1
IPI00445401.4	Isoform 2 of E3 ubiquitin-protein ligase HUWE1	0.0936	5	1	33	55	1139000000				423700000				1589000000	0.584	1		15	11	15	19	16	20	0.0431	0.0307	0.0441	0	0	0	0	4358	479.9	5.24	1
IPI00446834.2	Isoform 2 of Sulfotransferase 1A3/1A4	0.0812	2	1	1	2	56190000				0				31450000	1.11	1		1		1	1		1	0.0812		0.0812	2.15		2.18	4.33	197	22.1	6.92	1
IPI00465167.2	Isoform 2 of Arf-GAP with coiled-coil, ANK repeat and PH domain-containing protein 3	0.1555	2	1	11	12	126700000				95610000	0.869	1		490400000				2	4	5	2	5	5	0.0316	0.0646	0.0751	0	0	0	0	759	84.6	7.06	1
IPI00479654.2	Immunoglobulin superfamily containing leucine-rich repeat protein 2	0.0805	2	1	4	12	418700000				184800000	0.032	1		527400000				3	2	2	7	2	3	0.0711	0.0443	0.0362	1.83	2.02	0	3.85	745	78.9	5.29	1
IPI00514234.4	Ladinin-1	0.2147	2	1	11	26	684000000				96430000				552500000	0.807	1		7	4	6	11	5	10	0.1315	0.1006	0.1122	0	0	0	0	517	57.1	9.67	1
IPI00551024.5	Bifunctional ATP-dependent dihydroxyacetone kinase/FAD-AMP lyase (cyclizing)	0.2209	2	1	7	8	24660000				38200000				44770000	0.531	1		2	3	3	2	3	3	0.0661	0.0957	0.1148	0	0	0	0	575	58.9	7.49	1
IPI00641064.1	Uncharacterized protein	0.2959	6	1	6	8	235300000				634600000				684600000	0.954	1		2	2	3	2	2	4	0.1837	0.1837	0.1735	0	0	0	0	98	11.3	7.97	1
IPI00642944.1	Uncharacterized protein	0.265	16	1	14	25	263100000				150600000	0.889	1		320500000				9	7	5	11	8	6	0.1984	0.1772	0.1171	15.43	13.2	8.78	37.41	615	67.9	9.45	1
IPI00645171.1	Isoform 2 of Dipeptidyl peptidase 3	0.2839	8	1	6	6	68590000				42010000				156000000	0.5	1		2	1	3	2	1	3	0.1167	0.0379	0.1293	0	0	3.75	3.75	317	35.5	5.62	1
IPI00646304.4	Peptidyl-prolyl cis-trans isomerase B	0.2778	1	1	6	10	123900000				49830000				121500000	0.678	1		2	2	3	3	2	5	0.1204	0.0787	0.1667	0	0	0	0	216	23.7	9.41	1
IPI00747005.3	Isoform 2 of Protein arginine N-methyltransferase 8	0.1039	10	1	3	8	2513000				204300000	0.867	1		1469000000				1	3	1	1	5	2	0.039	0.1039	0.039	0	0	0	0	385	44.1	6.47	1
IPI00784067.6	zinc finger protein 821 isoform 1	0.068	3	1	4	4	75840000				370600000	0.759	1		534300000				2	1	1	2	1	1	0.0388	0.0267	0.0267	0	0	0	0	412	46.8	6.55	1
IPI00787169.3	Chromosome 2 open reading frame 27, isoform CRA_a	0.08	1	1	2	3	34040000				49810000	0.537	1		0				1	2		1	2		0.048	0.08		0	0		0	375	42.5	8.03	1
IPI00789225.3	Isoform 3 of NudC domain-containing protein 1	0.0403	3	1	2	2	115600000				0				51130000	1.064	1		1		1	1		1	0.0181		0.0222	0		0	0	496	56.6	5.11	1
IPI00790203.2	Uncharacterized protein	0.1175	4	1	6	9	282400000				25520000				52070000	0.456	1		4	2	3	4	2	3	0.0869	0.063	0.063	1.96	2.68	1.8	6.44	587	66.8	6.7	1
IPI00797525.1	Isoform 1 of Tudor domain-containing protein 12	0.0926	1	1	7	11	568300000				822200000				264300000	2.015	1		2	1	5	4	1	6	0.0323	0.0119	0.0578	0	0	0	0	1177	132.5	6.74	1
IPI00816461.1	Isoform 4 of Myosin-VI	0.1346	7	1	18	36	699000000				547200000				3373000000	0.41	1		5	9	11	7	12	17	0.049	0.0817	0.0926	0	2.04	2.94	4.98	1285	148.6	8.56	1
IPI00828098.2	protein ALO17 isoform 1	0.0919	3	1	43	75	1482000000				2523000000	1.822	1		1446000000				19	24	12	24	32	19	0.0445	0.0518	0.0274	4.11	2.38	2.23	8.72	5256	596.1	6.43	1
IPI00873472.1	Isoform 1 of Protein transport protein Sec24A	0.0887	1	2	7	11	25880000				51390000	0.628	1		39780000				4	3	3	4	3	4	0.0522	0.032	0.0366	0	2.67	2.6	5.27	1093	119.7	7.66	1
IPI00879002.1	Uncharacterized protein	0.0896	3	1	4	5	5348000000				54650000	0.38	1		0				2	2		3	2		0.0377	0.0519		0	0		0	636	73.5	5.54	1
IPI00908588.1	cDNA FLJ59206, highly similar to Eukaryotic translation initiation factor 4B	0.2147	5	1	10	12	136700000				2860000000	0.669	1		102900000				3	6	2	4	6	2	0.063	0.1482	0.0409	0	0	0	0	587	66.1	5.71	1
IPI00910977.1	3-mercaptopyruvate sulfurtransferase isoform 1	0.1356	4	1	4	4	69550000				1521000000	0.769	1		0				1	3		1	3		0.0505	0.1262		0	0		0	317	35.2	6.61	1
IPI00917978.1	CDNA: FLJ22921 fis, clone KAT06711	0.1049	18	1	3	6	2860000				31190000				73900000	0.731	1		1	1	1	1	1	4	0.0197	0.0361	0.0689	0	0	0	0	305	34.9	5.03	1
IPI00924544.1	35 kDa protein	0.0747	5	1	2	6	23380000				31050000	0.804	1		33090000				1	2	2	1	2	3	0.0357	0.0747	0.0747	0	0	0	0	308	34.6	6.54	1
IPI00925850.2	cDNA FLJ54572, highly similar to Lysosomal alpha-mannosidase	0.1589	3	2	11	13	195000000				1566000000	0.713	1		72810000				4	5	2	4	6	3	0.0653	0.0716	0.0337	0	7.97	0	7.97	950	107.4	7.02	1
IPI00926312.1	2-oxoglutarate dehydrogenase, mitochondrial isoform 3 precursor	0.0972	5	1	8	9	0				125200000				19620000	0.238	1		1	5	3	1	5	3	0.0128	0.0608	0.0363	0	0	1.67	1.67	1019	115.4	7.02	1
IPI00929676.1	phosphatidylinositol-5-phosphate 4-kinase type-2 gamma isoform b	0.1935	5	1	5	6	69380000				22240000	0.837	1		124400000				3	1	2	3	1	2	0.1166	0.0347	0.067	0	2.29	0	2.29	403	45	6.48	1
IPI00942186.1	Isoform 1 of A-kinase anchor protein 1, mitochondrial	0.0543	3	1	4	4	244500000				64990000	0.657	1		20750000				1	2	1	1	2	1	0.01	0.0365	0.0078	0	0	0	0	903	97.3	4.94	1
IPI00944640.1	aspartyl/asparaginyl beta-hydroxylase isoform f	0.1056	2	1	8	10	128200000				60570000				3643000000	0.62	1		4	2	2	4	4	2	0.0576	0.0233	0.0343	0	0	0	0	729	83.2	4.92	1
IPI00945507.1	succinyl-CoA ligase [GDP-forming] subunit beta, mitochondrial isoform 1 precursor	0.1659	4	1	6	12	753100000				36790000	0.834	1		133900000				4	1	3	7	1	4	0.1091	0.0341	0.0886	0	1.76	0	1.76	440	47.7	6.43	1
IPI00946597.1	Uncharacterized protein	0.1472	3	1	4	5	1776000000				0				36740000	0.53	1		3		1	4		1	0.0838		0.0635	0		3.12	3.12	394	43.8	6.34	1
IPI00947537.1	Uncharacterized protein	0.2222	1	1	3	6	145800000				49750000				36120000	0.955	1		2	2	2	2	2	2	0.2222	0.2222	0.2099	0	0	0	0	162	17.9	5.35	1
IPI00955456.1	Isoform 2 of E3 UFM1-protein ligase 1	0.1619	2	1	9	10	29390000				338400000	0.564	1		572500000				2	3	5	2	3	5	0.0329	0.0741	0.0741	0	3.29	0	3.29	729	82	6.96	1
IPI00964886.1	mitochondrial import inner membrane translocase subunit Tim8 B	0.1837	2	1	2	4	37890000				63930000	1.423	1		0				2	1		2	2		0.1837	0.1122		0	0		0	98	11.1	8.1	1
IPI00966466.1	Uncharacterized protein	0.2222	3	1	4	5	53980000				8703000	0.858	1		115200000				1	1	2	2	1	2	0.0359	0.0621	0.1242	0	2.07	0	2.07	306	34.2	7.05	1
IPI00978402.1	Uncharacterized protein	0.1811	3	1	10	15	202000000				311300000				118800000	0.815	1		3	5	3	3	5	7	0.0638	0.09	0.0478	0	2.34	0	2.34	878	98.1	5.62	1
IPI01009266.1	cDNA FLJ57525, highly similar to Cell division cycle protein 27 homolog	0.0682	4	1	6	6	209800000				1124000				15980000	0.718	1		2	1	3	2	1	3	0.0275	0.0131	0.038	0	0	0	0	763	84.8	7.31	1
IPI01009501.1	Uncharacterized protein	0.8323	21	1	6	28	430300000				649100000				36400000	0.979	3	18.4	3	4	4	11	9	8	0.3851	0.4224	0.5839	0	0	2.27	2.27	161	18.2	8.32	1
IPI01009610.1	cDNA FLJ57998, highly similar to Homo sapiens myo-inositol 1-phosphate synthase A1 (ISYNA1), mRNA	0.0702	4	1	3	5	19820000				13880000	0.771	1		18050000				3	1	1	3	1	1	0.0702	0.0365	0.0365	0	0	0	0	356	38.8	5.4	1
IPI01011073.2	Uncharacterized protein	0.1785	2	1	14	19	36200000				241000000				371500000	0.67	1		5	5	7	5	7	7	0.067	0.0733	0.085	1.6	0	0	1.6	941	106.7	7.03	1
IPI01014578.1	Serine/threonine-protein phosphatase (Fragment)	0.1921	4	1	8	12	1295000000				181000000				20710000	0.784	1		2	5	4	3	5	4	0.0558	0.1364	0.0682	0	0	4.42	4.42	484	55.1	6.2	1
IPI00414442.4	Isoform 1 of CDK5 regulatory subunit-associated protein 3	0.081	1	1	3	3	0				464400000	0.558	1		0					3			3			0.081			2.42		2.42	506	56.9	4.75	1
IPI00639961.2	Uncharacterized protein	0.1138	2	1	2	4	0				5654000				40610000	0.912	1			1	2		1	3		0.0554	0.1138		0	0	0	325	34.7	9.39	1
IPI00963963.1	Uncharacterized protein	0.25	4	1	2	2	0				137100000				45410000	0.809	1			1	1		1	1		0.25	0.2321		0	0	0	56	6.6	8.68	1
IPI00974544.1	Isoform SV of 14-3-3 protein epsilon	0.1416	4	1	3	3	0				30080000	0.268	1		0					3			3			0.1416			0		0	233	26.5	4.87	1
IPI00978005.1	cDNA FLJ51754, highly similar to Apoptosis inhibitor 5	0.152	6	1	8	9	0				4402000000				249900000	1.221	1			2	6		2	7		0.039	0.1131		0	2.51	2.51	513	57.9	8.57	1
IPI00978288.1	proteasome subunit beta type-2 isoform 2	0.2102	3	1	3	3	0				205500000	0.682	1		124600000					2	1		2	1		0.1591	0.0511		0	0	0	176	20.2	7.44	1
IPI01009589.1	Uncharacterized protein	0.6563	1	1	2	2	0				926000000	0.844	1		3736000					1	1		1	1		0.3125	0.6563		0	0	0	32	3.6	8.24	1
IPI01021199.1	29 kDa protein	0.1116	6	1	2	2	0				106300				9897000	0.635	1			1	1		1	1		0.0359	0.0757		0	3.21	3.21	251	28.9	8.5	1
IPI00555954.1	Calcium/calmodulin-dependent protein kinase II gamma isoform 6 variant (Fragment)	0.0516	1	1	1	1	0				0				17550000	0.673	1				1			1			0.0516			0	0	155	16.8	5.14	1
IPI00000211.1	Hydroxycarboxylic acid receptor 1	0.0723	1	1	3	10	12760000				162300000				502200000				2	2	1	4	5	1	0.0694	0.0434	0.0405	0	0	0	0	346	39.3	8.84	0
IPI00001999.2	Protein Mis18-beta	0.1572	1	1	2	2	20130000				82570000				0				1	1		1	1		0.048	0.1092		0	0		0	229	24.7	7.37	0
IPI00002313.3	Caspase recruitment domain-containing protein 10	0.1279	4	1	12	19	477500000				870400000				592500000				6	4	5	6	6	7	0.0882	0.0407	0.0475	1.63	0	0	1.63	1032	115.9	5.95	0
IPI00002580.2	Phosphatidylinositol-4-phosphate 3-kinase C2 domain-containing subunit alpha	0.1257	2	1	15	19	790800000				132700000				77910000				6	5	5	7	5	7	0.0516	0.0427	0.0368	2.3	1.78	0	4.08	1686	190.6	8.02	0
IPI00003421.3	T-box brain protein 1	0.0938	1	1	6	7	1736000000				67480000				97800000				4	2	1	4	2	1	0.0557	0.0425	0.0176	0	0	0	0	682	74	7.33	0
IPI00003824.1	Isoform 1 of Peptidyl-prolyl cis-trans isomerase-like 2	0.1385	2	1	8	12	987000000				78870000				961800000				5	2	5	5	2	5	0.1019	0.0404	0.0904	1.75	0	0	1.75	520	58.8	8.78	0
IPI00004358.4	Glycogen phosphorylase, brain form	0.07	1	1	6	11	423300000				369400000				4439000				4	4	1	6	4	1	0.0569	0.0688	0.013	4.32	4.33	0	8.65	843	96.6	6.86	0
IPI00004569.2	Isoform MZF1A of Myeloid zinc finger 1	0.1744	3	1	10	14	1311000000				248200000				76020000				4	3	5	4	3	7	0.0722	0.0545	0.0886	0	0	0	0	734	82	8.19	0
IPI00004977.2	Isoform 3 of Guanine nucleotide exchange factor VAV2	0.1311	4	1	11	14	261000000				143800000				370300000				3	5	5	3	6	5	0.0441	0.0739	0.0536	0	0	0	0	839	97	6.9	0
IPI00005149.3	Isoform 1 of tRNA guanosine-2'-O-methyltransferase TRM13 homolog	0.2308	1	1	10	16	49350000				258600000				48330000				3	6	3	3	7	6	0.0728	0.1435	0.0873	0	0	0	0	481	54.2	8.09	0
IPI00005743.1	Isoform a of Ataxin-7	0.1121	3	1	9	12	32610000				147500000				308000000				2	4	3	3	4	5	0.0235	0.0594	0.0348	0	0	0	0	892	95.4	9.85	0
IPI00005794.2	Uncharacterized protein	0.0963	1	1	6	24	151600000				26360000				115500000				3	4	4	5	10	9	0.0593	0.0704	0.0333	0	0	0	0	540	59.7	7.93	0
IPI00006054.1	Isoform 2 of Syntaphilin	0.1041	1	1	5	10	75940000				61960000				230700000				1	2	4	3	3	4	0.0242	0.0502	0.1041	0	0	0	0	538	58	5.94	0
IPI00007051.1	Tumor necrosis factor receptor superfamily member EDAR	0.0848	2	1	3	6	74870000				47350000				96800000				2	3	1	2	3	1	0.058	0.0848	0.0223	0	1.96	0	1.96	448	48.6	5.17	0
IPI00007798.1	Thyrotropin-releasing hormone-degrading ectoenzyme	0.1162	1	1	9	9	182300000				163700000				37940000				5	3	1	5	3	1	0.0479	0.0615	0.0313	0	0	0	0	1024	116.9	6.99	0
IPI00008552.6	Glutaredoxin-3	0.1552	1	2	4	11	46220000				44760000				42660000				4	2	2	5	3	3	0.1552	0.0836	0.0687	4.7	2.49	4.94	12.13	335	37.4	5.39	0
IPI00009865.4	Keratin, type I cytoskeletal 10	0.4538	7	13	23	68	346700000				1106000000				701700000				18	13	14	27	21	20	0.4315	0.3014	0.2997	64.32	53.79	55.83	173.94	584	58.8	5.21	0
IPI00012007.6	Adenosylhomocysteinase	0.2106	2	1	7	11	335200000				236700000				608600000				4	3	2	5	4	2	0.1111	0.0995	0.0741	2.01	0	0	2.01	432	47.7	6.34	0
IPI00012463.4	Isoform 1 of Putative deoxyribonuclease TATDN1	0.1178	6	1	4	12	73510000				382800000				103200000				2	3	2	4	3	5	0.0741	0.0808	0.0808	0	0	0	0	297	33.6	6.96	0
IPI00013678.2	Isoform 1 of Metaxin-1	0.1953	2	1	5	25	49430000				200500000				317600000				2	4	4	8	10	7	0.0708	0.1609	0.1652	0	0	0	0	466	51.4	9.79	0
IPI00014925.1	ATP-dependent DNA helicase Q4	0.0935	1	1	11	20	140400000				990700000				116600000				4	5	6	8	5	7	0.0364	0.0472	0.0464	0	0	0	0	1208	133	8.09	0
IPI00016513.5	Ras-related protein Rab-10	0.385	1	1	7	23	376600000				96360000				264700000				5	4	2	10	6	7	0.325	0.2	0.105	0	0	0	0	200	22.5	8.38	0
IPI00017494.1	cDNA FLJ10079 fis, clone HEMBA1001896, weakly similar to DIMETHYLGLYCINE DEHYDROGENASE	0.1091	3	1	4	16	2933000000				0				806800000				4	1	1	9	5	2	0.1091	0.0261	0.0261	0	0	0	0	614	69.8	5.87	0
IPI00018387.1	Furin	0.1146	1	1	4	4	10310000				83640000				0				3	1		3	1		0.097	0.0176		0	0		0	794	86.6	6.47	0
IPI00019051.4	Isoform 1 of Nuclear receptor subfamily 2 group C member 1	0.0879	2	1	5	7	165300000				90940000				101800000				1	3	2	2	3	2	0.0249	0.0464	0.0415	0	0	0	0	603	67.3	6.32	0
IPI00019359.4	Keratin, type I cytoskeletal 9	0.2231	1	5	9	20	413900000				388700000				101900000				7	5	4	8	7	5	0.1942	0.1445	0.1027	10.62	8.5	0	19.12	623	62	5.24	0
IPI00019407.1	Sterol-4-alpha-carboxylate 3-dehydrogenase, decarboxylating	0.1394	2	1	6	8	67840000				194800000				349000000				3	1	2	3	1	4	0.0858	0.0429	0.0617	0	0	0	0	373	41.9	8.06	0
IPI00019472.4	Neutral amino acid transporter B(0)	0.0407	2	1	2	3	32360000				0				25210000				1		2	1		2	0.024		0.0407	0		0	0	541	56.6	5.48	0
IPI00019501.1	Ephrin-B3	0.0853	1	1	3	8	147900000				1495000000				392800000				3	2	2	3	3	2	0.0853	0.0559	0.0588	0	0	0	0	340	35.8	8.6	0
IPI00019884.1	Alpha-actinin-2	0.2114	12	1	22	44	386300000				388600000				471400000				7	14	9	10	21	13	0.0928	0.1588	0.0962	6.18	1.79	1.75	9.72	894	103.8	5.45	0
IPI00021304.1	Keratin, type II cytoskeletal 2 epidermal	0.3783	8	6	22	32	2431000000				1160000000				1590000000				12	9	10	12	10	10	0.2589	0.2062	0.2326	7.41	3.69	2.17	13.27	645	65.8	8	0
IPI00021935.3	Sialic acid-binding Ig-like lectin 5	0.1071	1	1	3	3	1893000				0				49650000				2		1	2		1	0.0889		0.0181	0		0	0	551	60.7	7.27	0
IPI00022200.4	Isoform 1 of Collagen alpha-3(VI) chain	0.0737	4	1	18	22	829000000				96350000				261100000				10	6	4	10	8	4	0.0428	0.0239	0.0205	0	0	0	0	3177	343.5	6.68	0
IPI00023084.2	Zinc finger protein 319	0.1838	1	1	9	28	9753000000				5752000000				4669000000				6	5	6	7	8	13	0.1186	0.11	0.122	0	0	0	0	582	65.5	8.37	0
IPI00023505.4	Isoform 1 of Low affinity immunoglobulin gamma Fc region receptor II-a	0.2871	2	1	4	12	813000000				1828000000				943800000				3	1	2	5	3	4	0.2082	0.082	0.1609	2.69	4.61	2.88	10.18	317	35	6.68	0
IPI00024293.2	Exostosin-like 1	0.0917	1	1	4	6	986100000				72690000				0				4	1		5	1		0.0917	0.0104		0	0		0	676	74.6	8.19	0
IPI00025753.2	Desmoglein-1	0.0705	1	1	5	12	277300000				185100000				395100000				3	5	1	4	6	2	0.0515	0.0705	0.0181	0	0	0	0	1049	113.7	5.03	0
IPI00026317.3	Zinc finger and BTB domain-containing protein 7A	0.161	1	1	7	10	88850000				2306000000				1073000000				3	5	1	3	6	1	0.0565	0.1438	0.0188	0	0	0	0	584	61.4	5.19	0
IPI00027658.3	Isoform 1 of Diacylglycerol kinase gamma	0.1593	6	1	11	19	63980000				1238000000				59410000				3	8	3	6	8	5	0.0455	0.1201	0.0468	0	0	0	0	791	89.1	6.8	0
IPI00027803.2	Isoform 1 of Poly [ADP-ribose] polymerase 9	0.1756	4	1	12	94	3346000000				2772000000				3977000000				7	7	4	30	33	31	0.123	0.0984	0.0585	36.18	42.95	45.14	124.27	854	96.3	7.91	0
IPI00028955.4	Ribosome biogenesis protein BOP1	0.122	3	1	10	18	1112000000				52680000				115400000				3	3	5	6	5	7	0.0375	0.0362	0.0831	0	0	0	0	746	83.6	6.19	0
IPI00029046.1	Malectin	0.1884	2	1	5	5	32870000				289300000				15490000				1	3	1	1	3	1	0.0342	0.1199	0.0616	0	0	0	0	292	32.2	5.41	0
IPI00029662.1	Isoform 1 of Potassium voltage-gated channel subfamily H member 2	0.1182	4	1	9	15	8450000000				429000000				52890000				6	5	2	7	6	2	0.063	0.0733	0.0285	0	0	0	0	1159	126.6	7.93	0
IPI00030209.1	Similar to Forkhead box protein D1	0.0342	1	1	1	2	0				0				29110000				1		1	1		1	0.0342		0.0342	0		0	0	497	49	7.24	0
IPI00031131.4	Isoform 1 of Adipocyte plasma membrane-associated protein	0.2236	2	1	4	9	40670000				9641000				254700000				1	2	2	3	2	4	0.0625	0.1154	0.125	2.24	1.63	0	3.87	416	46.5	6.16	0
IPI00032406.1	DnaJ homolog subfamily A member 2	0.0874	1	1	4	5	127900				0				20500000				2		2	3		2	0.0413		0.0461	0		0	0	412	45.7	6.48	0
IPI00032936.4	ETS domain-containing transcription factor ERF	0.0912	2	1	5	20	0				284100000				51460000000				1	3	3	4	9	7	0.0219	0.0547	0.0602	0	0	0	0	548	58.7	7.3	0
IPI00043735.3	Isoform 1 of Zinc finger protein 599	0.1037	2	1	6	10	259000000				417400000				489700000				3	1	5	4	1	5	0.0612	0.0238	0.085	0	0	0	0	588	67.4	8.37	0
IPI00059169.4	Coiled-coil domain-containing protein 102A	0.1982	1	1	12	17	280900000				1852000000				10370000				8	5	4	8	5	4	0.1327	0.0927	0.0855	0	0	0	0	550	62.6	5.58	0
IPI00062344.6	Uncharacterized protein	0.2418	3	1	5	6	8649000				28220000				76800000				1	3	2	1	3	2	0.0507	0.1731	0.0955	1.69	0	1.73	3.42	335	37.7	9.33	0
IPI00063781.6	Retina and anterior neural fold homeobox protein 2	0.0707	3	1	1	4	71320000				0				3216000				1	1	1	2	1	1	0.0707	0.0707	0.0707	0	0	0	0	184	20.1	9.45	0
IPI00065501.4	Junctional sarcoplasmic reticulum protein 1	0.281	1	1	8	13	72390000				52190000				175600000				4	1	4	8	1	4	0.1601	0.0665	0.1208	0	0	0	0	331	36.3	9.38	0
IPI00069232.4	G-protein coupled receptor-associated sorting protein 2	0.0334	1	1	3	7	34460000				0				207400000				2		2	4		3	0.0191		0.0263	0		0	0	838	93.7	5.01	0
IPI00070943.4	Isoform 1 of Phosphatidylinositol 4-kinase alpha	0.1008	2	1	16	19	234600000				234000000				246200000				7	4	7	7	4	8	0.046	0.021	0.0553	0	0	0	0	2044	231.2	6.87	0
IPI00103104.3	N(6)-adenine-specific DNA methyltransferase 2	0.1075	1	1	3	7	250000000				323700000				267800000				2	3	1	3	3	1	0.1075	0.1075	0.0561	0	0	0	0	214	24.5	4.55	0
IPI00104050.3	Thyroid hormone receptor-associated protein 3	0.2545	1	1	25	40	789300000				2603000000				185600000				15	12	7	18	14	8	0.1654	0.1288	0.1005	0	0	0	0	955	108.6	10.15	0
IPI00140449.5	Isoform 2 of ELAV-like protein 3	0.1667	2	1	4	6	3131000				8935000				78310000				2	1	2	2	1	3	0.0833	0.0417	0.0861	0	0	0	0	360	38.8	9.28	0
IPI00152881.5	Isoform 1 of Protein Shroom3	0.1002	2	1	15	23	1575000000				61190000				238600000				6	6	7	8	7	8	0.0341	0.0366	0.0566	2.09	1.95	3.66	7.7	1996	216.7	7.8	0
IPI00155475.5	BTB/POZ domain-containing protein KCTD19	0.0853	1	1	4	4	56800000				354300				234600000				2	1	1	2	1	1	0.0443	0.0119	0.0292	0	0	0	0	926	104.9	6.21	0
IPI00155729.6	Plexin-B3	0.0529	2	1	7	8	32000000				42080000				27140000				3	2	3	3	2	3	0.0325	0.01	0.0241	0	0	0	0	1909	206.7	6.4	0
IPI00160131.5	Isoform 2 of Myosin-IXa	0.1518	4	1	34	53	492900000				693900000				301700000				18	14	10	22	19	12	0.0807	0.0704	0.0455	2.26	1.61	0	3.87	2529	290.2	8.91	0
IPI00166033.1	Isoform 1 of T-cell activation Rho GTPase-activating protein	0.0657	2	1	6	25	886300000				947400000				3048000000				4	5	2	7	12	6	0.0465	0.0506	0.0301	0	0	0	0	731	80.7	6.47	0
IPI00166294.1	Uncharacterized protein C10orf85	0.125	1	1	1	2	27700000				41940000				0				1	1		1	1		0.125	0.125		0	0		0	128	13.3	7.75	0
IPI00166825.5	Isoform 1 of MPN domain-containing protein	0.1231	1	1	4	5	402900000				188200000				47530000				2	2	1	2	2	1	0.0616	0.0616	0.0403	0	0	0	0	471	50.6	5.72	0
IPI00167305.6	Isoform 1 of Ankyrin repeat domain-containing protein 13B	0.1006	2	1	7	12	140000000				251900000				144400000				4	3	3	5	4	3	0.0607	0.0447	0.0463	0	0	0	0	626	70.2	6.93	0
IPI00167918.2	Cyclic nucleotide-binding domain-containing protein 1	0.1147	1	1	5	5	39110000				31260000				0				2	3		2	3		0.0573	0.0894		0	0		0	436	50.2	9.07	0
IPI00168769.19	Isoform 2 of Exophilin-5	0.1609	4	1	25	40	1104000000				185200000				775900000				17	10	8	18	13	9	0.107	0.0661	0.055	0	0	0	0	1982	221.6	7.87	0
IPI00168810.2	Isoform 1 of Zinc finger protein 397	0.1124	1	1	6	10	135200000				128800000				234200000				4	1	4	4	1	5	0.0936	0.0206	0.0637	0	0	0	0	534	61.1	7.27	0
IPI00168908.4	Isoform 3 of Telomerase reverse transcriptase	0.1833	1	1	16	20	1247000000				374400000				66210000				8	6	4	9	6	5	0.1123	0.0674	0.0402	0	0	0	0	1069	120	10.71	0
IPI00171156.2	cDNA FLJ55903, highly similar to Probable G-protein coupled receptor 161	0.1621	1	1	7	14	1568000000				894000000				582700000				5	4	3	6	5	3	0.1257	0.0965	0.0692	0	0	0	0	549	60.6	8.66	0
IPI00171516.2	Plasmalemma vesicle-associated protein	0.1742	1	1	6	7	26260000				158600000				240600000				2	3	2	2	3	2	0.0792	0.0747	0.0566	1.66	0	1.61	3.27	442	50.6	8.79	0
IPI00176388.1	Zinc finger protein 248	0.1209	1	1	8	12	205900000				214000000				151100000				5	2	4	5	2	5	0.0812	0.0345	0.0708	0	0	0	0	579	67	8.25	0
IPI00176706.1	Splicing factor 45	0.207	5	1	6	6	178500000				386700				18010000				1	1	4	1	1	4	0.0474	0.0349	0.1247	1.94	0	0	1.94	401	44.9	5.97	0
IPI00176829.2	Isoform 1 of Ras association domain-containing protein 3	0.3361	2	1	6	10	1140000000				408000000				645900000				1	4	2	3	5	2	0.1303	0.2941	0.0672	2.3	0	0	2.3	238	27.5	7.44	0
IPI00178066.6	Isoform 3 of Deleted in lung and esophageal cancer protein 1	0.0574	1	1	9	27	393400000				4126000000				132600000				6	4	4	11	9	7	0.0354	0.0242	0.0315	0	0	0	0	1778	197.8	6.46	0
IPI00180128.4	Isoform 2 of Basic leucine zipper and W2 domain-containing protein 1	0.1473	8	1	4	6	1006000000				1040000000				31380000				2	2	1	3	2	1	0.0453	0.0482	0.0737	0	0	2.61	2.61	353	40.5	6.46	0
IPI00182967.7	Isoform 1 of Sterile alpha motif domain-containing protein 13	0.1148	1	1	1	1	168200000				0				0				1			1			0.1148			0			0	122	13.6	5.06	0
IPI00186299.7	Isoform IIb of Synapsin-2	0.1423	4	1	4	10	2508000				367800000				39460000				1	2	2	1	5	4	0.0377	0.0607	0.0607	0	0	0	0	478	52.1	7.72	0
IPI00216252.5	Isoform 2 of Kinesin-like protein KIF1B	0.1339	4	1	24	41	684400000				783800000				261800000				13	6	12	18	9	14	0.0746	0.048	0.074	4.57	6.36	4.25	15.18	1770	199.1	5.55	0
IPI00216367.1	Isoform 4 of Granulocyte colony-stimulating factor receptor	0.0587	5	1	3	12	34120000				2080000000				33190000				3	2	2	3	6	3	0.0587	0.0332	0.0332	0	0	0	0	783	86.6	6.43	0
IPI00217461.1	Isoform 3 of Apoptotic protease-activating factor 1	0.1424	7	1	12	20	412400000				267300000				211500000				7	4	7	8	5	7	0.0863	0.0494	0.0745	0	0	0	0	1194	135.9	6.44	0
IPI00218188.1	Isoform Beta of Signal transducer and activator of transcription 1-alpha/beta	0.0801	3	1	7	10	17510000				2523000000				103700000				2	3	3	2	5	3	0.0365	0.0337	0.0239	0	0	0	0	712	83	6.42	0
IPI00218494.3	Isoform 1 of 3 beta-hydroxysteroid dehydrogenase/Delta 5-->4-isomerase type 2	0.1935	3	1	4	4	85570000				0				9398000				2		2	2		2	0.129		0.0672	0		0	0	372	42	8.03	0
IPI00218571.1	Isoform 1 of Phosphorylase b kinase regulatory subunit beta	0.1052	4	1	9	10	161200000				23490000				76010000				4	3	2	5	3	2	0.0476	0.0421	0.0156	0	0	0	0	1093	124.8	6.95	0
IPI00218758.1	Isoform 3 of Arginine decarboxylase	0.1602	5	1	5	11	161600000				80760000				63270000				3	3	2	3	6	2	0.1326	0.1105	0.0276	0	0	0	0	362	39.3	6.62	0
IPI00219001.1	Isoform Short of Atrial natriuretic peptide receptor 2	0.0784	7	1	9	10	98490000				3543000				194200000				4	2	4	4	2	4	0.0402	0.0191	0.0392	0	0	0	0	995	111.1	6.77	0
IPI00219185.1	Isoform L-APP696 of Amyloid beta A4 protein (Fragment)	0.1279	5	1	10	11	304300000				62430000				188800000				3	4	4	3	4	4	0.0575	0.0776	0.046	0	0	0	0	696	78.8	4.83	0
IPI00219249.4	Contactin-associated protein 1	0.0614	1	1	8	11	503900000				354100000				248700000				3	3	3	5	3	3	0.026	0.0246	0.021	0	0	0	0	1384	156.2	7.05	0
IPI00220327.4	Keratin, type II cytoskeletal 1	0.4037	28	9	23	66	5761000000				4631000000				4082000000				14	12	14	22	17	27	0.2531	0.2081	0.3075	7.89	9.07	12.88	29.84	644	66	8.12	0
IPI00220460.1	Isoform 2 of Oxysterol-binding protein-related protein 2	0.1218	2	1	6	13	2259000000				3270000000				919400000				3	4	3	4	5	4	0.0962	0.1004	0.0748	0	2.17	0	2.17	468	53.9	6.62	0
IPI00241886.3	Dendrin	0.1125	1	1	7	8	402400000				2176000000				1535000000				2	4	1	2	4	2	0.0366	0.0647	0.0239	1.79	0	0	1.79	711	75.9	10.17	0
IPI00242841.2	Isoform 1 of WD repeat-containing protein 59	0.0729	3	1	5	6	163600000				104400000				851100000				2	2	2	2	2	2	0.0257	0.0287	0.0349	1.68	0	0	1.68	974	109.7	7.91	0
IPI00289914.1	MutS protein homolog 4	0.0833	1	1	8	23	170200000				17360000				122800000				4	4	3	8	9	6	0.0363	0.0267	0.0598	0	0	0	0	936	104.7	7.37	0
IPI00290938.7	Zinc finger MYND domain-containing protein 12	0.1123	2	1	2	3	0				0				36610000				1		2	1		2	0.0849		0.1123	0		0	0	365	41.8	6.23	0
IPI00291761.4	Isoform 1 of Zinc finger protein neuro-d4	0.3237	14	1	9	13	2839000000				326500000				12080000				4	6	2	4	7	2	0.1816	0.1947	0.0711	0	0	0	0	380	42.5	6.86	0
IPI00292836.4	Isoform 1 of Uncharacterized protein C9orf174	0.1403	3	1	21	35	18490000000				387800000				606900000				9	9	7	9	17	9	0.0711	0.0717	0.0553	0	0	0	0	1646	191	6.04	0
IPI00296099.6	Thrombospondin-1	0.1094	1	1	10	26	6889000000				332500000				80860000				2	9	3	7	13	6	0.0359	0.0991	0.0462	0	0	0	0	1170	129.3	4.94	0
IPI00296337.2	Isoform 1 of DNA-dependent protein kinase catalytic subunit	0.1519	1	1	58	80	2087000000				540100000				7523000000				29	20	21	33	23	24	0.0739	0.0652	0.0555	10.64	9.02	5.12	24.78	4128	468.8	7.12	0
IPI00296432.1	Isoform 1 of Protein IWS1 homolog	0.199	3	1	13	26	135300000				178300000				786800000				7	5	5	10	9	7	0.1221	0.0708	0.0684	0	0	0	0	819	91.9	4.69	0
IPI00296563.3	Translation factor GUF1, mitochondrial	0.2063	1	1	9	12	123100000				40340000				110500000				4	3	4	4	3	5	0.0897	0.0777	0.1271	0	1.93	2.27	4.2	669	74.3	8.59	0
IPI00296869.5	Proteinase-activated receptor 1	0.0565	1	1	1	1	9273000				0				0				1			1			0.0565			0			0	425	47.4	8.27	0
IPI00297572.6	157 kDa protein	0.0746	2	1	12	18	743500000				226100000				291500000				3	7	7	3	7	8	0.0185	0.0429	0.0532	0	0	0	0	1353	156.8	7.05	0
IPI00298306.5	Serine-protein kinase ATM	0.1116	1	1	33	79	419300000				399600000				690900000				16	14	21	22	24	33	0.0589	0.0533	0.0681	1.7	3.73	1.93	7.36	3056	350.5	6.81	0
IPI00298447.3	Probable methyltransferase TARBP1	0.0697	1	1	8	11	188300000				318500000				243500000				2	5	3	3	5	3	0.0167	0.0376	0.0315	0	0	0	0	1621	181.6	7.05	0
IPI00301163.1	Protein O-glucosyltransferase 1	0.148	1	1	5	11	1034000000				688600000				6721000				2	3	1	5	3	3	0.0485	0.0995	0.023	0	0	0	0	392	46.2	8.72	0
IPI00302895.6	Isoform 1 of Ubiquitin thioesterase OTUB2	0.1795	2	1	4	40	2264000000				58400000000				19610000000				4	1	3	16	15	9	0.1795	0.0427	0.0769	0	0	0	0	234	27.2	6.23	0
IPI00304666.4	Solute carrier family 25 member 38	0.1382	1	1	3	3	74070000				338600000				0				2	1		2	1		0.0855	0.0526		0	0		0	304	33.5	9.51	0
IPI00307656.2	Hippocampus abundant transcript 1 protein	0.0755	1	1	3	4	147500000				405700000				0				2	1		2	2		0.0633	0.0122		0	0		0	490	53	8.4	0
IPI00328885.3	Uncharacterized protein	0.1834	2	1	42	123	1294000000				2042000000				1359000000				18	22	18	29	45	49	0.0758	0.1006	0.0863	0	5.6	3.51	9.11	3708	383.6	5.99	0
IPI00332371.9	Isoform 1 of 6-phosphofructokinase, liver type	0.1141	3	1	7	12	1059000000				100700000				900100000				4	1	3	8	1	3	0.0679	0.0103	0.05	3.86	0	1.61	5.47	780	85	7.5	0
IPI00334400.2	Isoform 2 of Plakophilin-4	0.1027	2	1	10	40	121600000				1100000000				483300000				6	5	6	15	11	14	0.0653	0.0557	0.0696	5.99	1.93	4.44	12.36	1149	127.1	8.95	0
IPI00335509.3	Dihydropyrimidinase-related protein 5	0.1578	1	1	5	27	72340000				680700000				262800000				5	2	1	9	10	8	0.1578	0.078	0.0585	2.51	0	0	2.51	564	61.4	7.2	0
IPI00374208.3	Isoform 2 of Cullin-associated NEDD8-dissociated protein 2	0.0733	2	1	9	10	128300000				46400000				65120000				4	3	3	4	3	3	0.0393	0.0268	0.0268	0	0	0	0	1119	122.6	5.87	0
IPI00374272.3	UPF0600 protein C5orf51	0.1871	1	1	4	4	10030000				0				1467000				3		1	3		1	0.1327		0.0544	1.65		0	1.65	294	33.6	5.26	0
IPI00375339.2	Isoform 1 of Sodium/potassium-transporting ATPase subunit alpha-4	0.1011	2	1	10	172	37380000000				34380000000				3091000000				5	6	5	52	58	62	0.0534	0.0729	0.0573	14.74	21.52	11.2	47.46	1029	114.1	6.64	0
IPI00375575.4	cDNA FLJ53804, highly similar to Nucleoside diphosphate-linked moiety X motif 16	0.3176	1	1	2	4	0				185700000				2092000				1	1	1	1	2	1	0.2365	0.0811	0.2365	0	0	0	0	148	16.1	8.22	0
IPI00375881.1	Polycystic kidney disease protein 1-like 3	0.0341	1	1	3	6	3999000				6682000				370900				2	2	1	2	3	1	0.0237	0.0214	0.0104	0	0	0	0	1732	195.8	8.48	0
IPI00376197.2	Complement C1q-like protein 2	0.1045	1	1	2	8	74120000				74280000				19770000				1	2	1	1	4	3	0.1045	0.1045	0.1045	0	0	0	0	287	29.4	5.81	0
IPI00376215.2	Isoform 2 of DNA-dependent protein kinase catalytic subunit	0.1504	1	1	57	79	2114000000				540100000				7523000000				29	18	20	35	21	23	0.0742	0.0598	0.0535	8.96	6.7	5.12	20.78	4097	465.2	7.17	0
IPI00382423.1	Ig lambda chain V-II region TOG	0.1532	1	1	1	1	18450000				0				0				1			1			0.1532			0			0	111	11.7	8.48	0
IPI00382490.1	Ig heavy chain V-III region BUR	0.1849	1	1	2	5	439700000				329400000				69990000				1	2	1	1	3	1	0.0924	0.1849	0.0924	0	0	0	0	119	13	9.6	0
IPI00384217.1	Envelope glycoprotein	0.0513	1	1	3	8	64260000				217300000				52700000				1	2	1	3	3	2	0.0191	0.0323	0.0191	0	0	0	0	682	77.1	8.69	0
IPI00384219.1	Gag protein	0.195	1	1	5	9	420100000				59710000				56670000				1	2	3	1	2	6	0.0306	0.0841	0.1013	0	0	0	0	523	59	7.14	0
IPI00385569.1	PMS2L5 protein (Fragment)	0.3333	4	1	5	7	26070000				100100000				343900000				2	3	2	2	3	2	0.307	0.1491	0.2193	1.82	0	1.65	3.47	114	12.1	9.79	0
IPI00385784.1	Protein-serine/threonine kinase (Fragment)	0.4752	1	1	3	37	79350000				524100000				120800000				2	2	2	14	12	11	0.3069	0.3069	0.3465	0	0	0	0	101	11.5	8.16	0
IPI00386897.6	MAP7 domain-containing protein 3 isoform 2	0.2121	4	1	18	28	282900000				250200000				859600000				7	7	9	7	8	13	0.0641	0.0944	0.1189	0	0	0	0	858	96.7	9.32	0
IPI00395401.3	Isoform 3 of Cdc42-interacting protein 4	0.3035	5	1	15	29	243100000				1108000000				1233000000				4	7	10	6	9	14	0.0708	0.1669	0.2293	0	0	0	0	593	67.6	6.25	0
IPI00395444.7	Isoform 1 of Calmodulin-regulated spectrin-associated protein 1	0.1779	3	1	27	38	133200000				75490000				63840000				15	9	10	16	11	11	0.1211	0.073	0.0568	0	0	0	0	1602	177.9	6.73	0
IPI00395527.2	Isoform 4 of MYC-induced nuclear antigen	0.1185	3	1	5	17	31730000				934300000				4144000				2	4	1	4	9	4	0.0496	0.1056	0.0366	0	0	0	0	464	52.6	6.7	0
IPI00398020.7	Teneurin-3	0.0667	1	1	15	18	194600000				849700000				368000000				8	4	5	8	4	6	0.04	0.0245	0.0215	0	0	0	0	2699	300.8	6.42	0
IPI00402215.3	Isoform 3 of Collagen alpha-1(XIV) chain	0.0723	3	1	9	11	42880000				2492000000				467600000				4	3	3	4	4	3	0.037	0.0176	0.0241	1.88	0	0	1.88	1701	183	5.29	0
IPI00409651.1	Cortexin-1	0.2317	1	1	1	2	0				0				0				1		1	1		1	0.2317		0.2317	0		0	0	82	9	5.24	0
IPI00410436.5	Uncharacterized protein C2orf55	0.132	1	1	9	13	103300000				220300000				87920000				4	3	5	4	3	6	0.0717	0.0343	0.0811	0	0	0	0	962	102.1	7.96	0
IPI00412650.2	Isoform 1 of Supervillin	0.1396	3	1	24	36	552400000				116700000				277600000				6	11	11	9	13	14	0.0325	0.0718	0.07	0	0	0	0	2214	247.6	6.98	0
IPI00412898.2	Isoform 2 of SPARC-related modular calcium-binding protein 1	0.1471	2	1	6	7	71920000				63700000				210100000				1	3	3	1	3	3	0.0276	0.1011	0.0483	0	0	0	0	435	48.2	8.22	0
IPI00412941.4	Isoform 4 of UPF0636 protein C4orf41	0.0943	5	1	8	10	30420000				43680000				14540000000				5	2	3	5	2	3	0.0472	0.0206	0.0511	0	0	0	0	1018	115.9	6.96	0
IPI00413365.3	Isoform 1 of Zinc finger protein 318	0.1387	1	1	28	42	1847000000				1162000000				914200000				18	8	7	22	11	9	0.0864	0.0452	0.0439	0	0	0	0	2279	251	7.2	0
IPI00419541.4	Guanylate-binding protein 4	0.1109	1	1	6	8	301300000				425100000				165100000				3	3	2	3	3	2	0.0594	0.0422	0.0516	0	0	0	0	640	73.1	6.02	0
IPI00437751.1	Isoform Somatic-1 of Angiotensin-converting enzyme	0.075	4	1	8	17	416600000				46240000				3757000000				3	3	6	4	6	7	0.0299	0.036	0.0505	0	0	0	0	1306	149.6	6.39	0
IPI00438229.2	Isoform 1 of Transcription intermediary factor 1-beta	0.1377	2	1	10	13	111100000				78680000				190300000				5	2	5	6	2	5	0.0826	0.0347	0.0838	2.21	0	0	2.21	835	88.5	5.77	0
IPI00441473.3	Protein arginine N-methyltransferase 5	0.1429	8	1	9	13	453600000				1186000000				59910000				5	3	3	7	3	3	0.0816	0.0534	0.0565	2.18	0	0	2.18	637	72.6	6.29	0
IPI00442752.1	CDNA FLJ26767 fis, clone PRS02825	0.3657	1	1	4	6	100800000				300400000				390800000				1	3	2	1	3	2	0.0746	0.2836	0.194	0	0	0	0	134	15.2	9.92	0
IPI00444016.1	Conserved hypothetical protein	0.1628	1	1	2	23	3333000				3686000				1079000				2	2	1	7	9	7	0.1628	0.1628	0.1318	0	0	0	0	129	14.4	5.08	0
IPI00455190.2	Isoform 2 of Cytochrome c oxidase assembly protein COX15 homolog	0.0876	2	1	4	10	1052000000				872000000				270500000				2	2	3	3	4	3	0.0541	0.0567	0.0593	0	0	0	0	388	43.8	9.64	0
IPI00465016.7	Isoform 2 of Sulfhydryl oxidase 1	0.0464	2	1	2	15	10470000000				9530000000				4751000000				1	1	2	3	4	8	0.0248	0.0248	0.0464	0	1.89	3.91	5.8	604	66.8	8.56	0
IPI00465427.2	Isoform 1 of Transcription factor EB	0.0861	6	1	4	4	1395000000				79130000				71550000				1	1	2	1	1	2	0.0336	0.0168	0.0357	0	0	0	0	476	52.8	6.29	0
IPI00478631.6	cDNA, FLJ78910, highly similar to Zinc finger protein 512	0.2067	3	1	14	24	360100000				206100000				192100000				6	4	6	13	5	6	0.1007	0.076	0.0936	0	0	0	0	566	64.6	9.76	0
IPI00479143.3	Isoform 1 of Pericentrin	0.1838	2	1	58	83	4398000000				2492000000				1075000000				23	27	23	25	31	27	0.0722	0.0983	0.0842	2.29	6.33	8.44	17.06	3336	377.8	5.55	0
IPI00549348.2	Isoform D1 of DNA damage-binding protein 2	0.0462	3	1	1	2	175600000				397900000				0				1	1		1	1		0.0462	0.0462		0	0		0	238	26.7	9.61	0
IPI00549676.1	Isoform 2 of Centrosomal protein of 70 kDa	0.1047	7	1	5	6	87310000				47160000				272100000				1	2	2	2	2	2	0.0217	0.0415	0.0415	0	0	0	0	554	64.8	6.27	0
IPI00550385.3	Isoform 1 of Microtubule-actin cross-linking factor 1, isoforms 1/2/3/5	0.1094	2	1	66	89	327700000				1716000000				3204000000				23	32	26	24	37	28	0.0407	0.0547	0.044	0	1.66	1.85	3.51	7388	837.8	5.39	0
IPI00552214.1	Uncharacterized protein	0.0959	2	1	2	4	139200000				80570000				315500000				2	1	1	2	1	1	0.0959	0.0548	0.0548	0	1.82	0	1.82	219	24.9	5.02	0
IPI00553211.1	Isoform 2 of Ermin	0.1077	4	1	4	5	87180000				17060000				8353000000				2	1	1	2	1	2	0.0505	0.0572	0.037	0	0	0	0	297	34.3	4.92	0
IPI00555769.1	Calcium/calmodulin-dependent protein kinase I variant (Fragment)	0.1232	1	1	2	13	378100000				397300000				261300000				1	2	2	3	4	6	0.0725	0.1232	0.1232	0	0	0	0	138	15.9	6.14	0
IPI00556588.3	Isoform 2 of Transient receptor potential cation channel subfamily V member 6	0.0952	2	1	4	69	2848000000				130800000				2073000000				2	2	3	24	23	22	0.0592	0.0431	0.079	0	0	0	0	557	64.3	8.07	0
IPI00640104.2	Uncharacterized protein	0.1708	7	1	6	7	27660000				173000000				108800000				1	3	2	1	4	2	0.0159	0.0638	0.0911	0	2.56	0	2.56	439	48.8	5.43	0
IPI00640529.2	dual specificity protein kinase TTK isoform 2	0.1355	2	1	11	17	280700000				242200000				398300000				5	4	5	6	5	6	0.0806	0.0339	0.0584	2.47	0	0	2.47	856	96.9	8.16	0
IPI00640632.1	Uncharacterized protein	0.046	7	1	1	1	46960000				0				0				1			1			0.046			0			0	457	49.5	8.82	0
IPI00640922.1	Isoform 2 of Large proline-rich protein BAG6	0.0577	8	1	5	7	311400000				3317000				38790000				3	1	2	4	1	2	0.0329	0.0142	0.0249	0	0	0	0	1126	118.6	5.6	0
IPI00642046.1	RSL1D1 protein	0.2515	2	1	14	32	410500000				104400000				154100000				9	6	6	10	10	12	0.1779	0.1022	0.1595	0	0	0	0	489	54.8	10.13	0
IPI00642069.4	Uncharacterized protein	0.2432	5	1	5	15	1664000000				1646000000				1722000000				4	3	3	6	5	4	0.2387	0.1892	0.1892	0	1.67	1.68	3.35	222	24.3	8.25	0
IPI00645050.3	FLJ00189 protein (Fragment)	0.1324	4	1	4	8	939000000				372300000				2059000000				2	2	2	3	2	3	0.0835	0.0855	0.0896	0	0	0	0	491	53.6	7.34	0
IPI00646142.1	Protein	0.1029	2	1	3	27	3540000000				188700000				811600000				2	1	2	12	6	9	0.0514	0.0418	0.0932	0	0	0	0	311	34.4	6.87	0
IPI00651638.1	Isoform 2 of Angiomotin-like protein 1	0.1424	4	1	12	24	2886000000				952300000				826000000				7	3	5	7	9	8	0.1015	0.0309	0.0497	0	0	0	0	906	101.1	7.33	0
IPI00655760.1	Envelope polyprotein	0.0451	1	1	2	2	412400000				346800000				0				1	1		1	1		0.0271	0.018		0	0		0	665	73.9	6.96	0
IPI00657725.2	Isoform 2 of Sodium-dependent phosphate transport protein 2B	0.0958	2	1	5	17	534700000				127200000				6864000				3	4	1	7	6	4	0.0493	0.0784	0.0218	0	0	0	0	689	75.6	8.21	0
IPI00738303.4	Putative uncharacterized protein (Fragment)	0.4308	1	1	5	17	287400000				14600000				188900000				3	2	3	5	4	8	0.4	0.2462	0.2154	0	0	0	0	65	7.3	8.57	0
IPI00742241.5	Putative cyclin-Y-like protein 3	0.1744	1	1	5	5	93190000				165800000				224400000				1	2	2	1	2	2	0.0262	0.064	0.0843	0	0	0	0	344	39.1	7.53	0
IPI00742656.1	Similar to SubName: Full=Predicted protein;	0.2554	1	1	5	6	202600000				74000000				65410000				3	1	1	3	1	2	0.1515	0.0476	0.0563	0	0	0	0	231	25.7	8.6	0
IPI00745230.2	Isoform 2 of DNA polymerase zeta catalytic subunit	0.1101	3	1	25	57	2802000000				4082000000				1439000000				14	13	10	22	19	16	0.0554	0.0596	0.0518	2.19	0	2.12	4.31	3052	343.9	8.47	0
IPI00746365.1	Similar to Glycosyltransferase	0.5299	1	1	6	21	52450000				70900000				59530000				2	4	2	4	11	6	0.1343	0.5299	0.2239	4.18	4.46	6.02	14.66	134	15.4	11.28	0
IPI00746684.4	Isoform 1 of Dedicator of cytokinesis protein 5	0.123	2	1	19	33	10900000000				914500000				2760000000				9	9	6	12	11	10	0.0551	0.0572	0.0406	0	0	1.97	1.97	1870	215.2	7.96	0
IPI00748886.3	Disintegrin and metalloproteinase domain-containing protein 32	0.061	3	1	4	6	65230000				40720000				114300000				2	2	2	2	2	2	0.0241	0.0368	0.0241	0	0	0	0	787	87.9	5.55	0
IPI00783238.2	Isoform 1 of DENN domain-containing protein 5B	0.0683	2	1	7	8	31280000000				0				251100000				3	1	3	4	1	3	0.0251	0.0078	0.0463	0	0	0	0	1274	144.9	6.73	0
IPI00783995.3	Isoform 1 of EF-hand domain-containing family member B	0.2305	3	1	19	34	1270000000				1351000000				1229000000				13	5	8	18	6	10	0.1417	0.0684	0.1285	0	0	0	0	833	93.7	7.58	0
IPI00784161.1	Isoform 1 of Transcription elongation factor SPT6	0.1373	2	1	20	38	1027000000				297300000				166900000				9	9	9	12	13	13	0.0666	0.0649	0.0672	0	0	0	0	1726	198.9	4.91	0
IPI00788666.3	lipoxygenase homology domain-containing protein 1 isoform 1	0.1226	3	1	26	38	329700000				149800000				2810000000				11	9	13	12	9	17	0.0642	0.0416	0.0656	0	0	0	0	2211	252.4	5.43	0
IPI00788750.4	cDNA FLJ56473, highly similar to Zinc finger and BTB domain-containing protein 38	0.143	3	1	15	83	2942000000				754900000				2966000000				9	5	8	27	25	31	0.0753	0.0585	0.0786	16.62	20.4	26.58	63.6	1196	134.2	8.03	0
IPI00788829.1	Uncharacterized protein	0.1548	6	1	5	6	26890000				99350000				983900000				2	2	1	2	3	1	0.0397	0.0714	0.0437	0	0	0	0	252	28.5	9.76	0
IPI00790032.2	cDNA FLJ53135, highly similar to Choline-phosphate cytidylyltransferase A	0.253	3	1	7	14	737700000				151400000				154400000				2	4	4	3	6	5	0.0793	0.1646	0.128	0	2.03	0	2.03	328	37.3	7.81	0
IPI00790579.1	Uncharacterized protein	0.3701	7	1	2	6	595800000				0				2138000000				1		2	2		4	0.1181		0.3701	0		0	0	127	13.2	9.86	0
IPI00790611.4	Uncharacterized protein	0.25	1	1	1	1	372300				0				0				1			1			0.25			0			0	128	13.8	6.77	0
IPI00790636.1	HLA-B associated transcript 1	0.1365	20	1	7	8	508400				331400000				2079000000				1	2	4	1	2	5	0.0447	0.0471	0.0894	0	0	0	0	425	48.8	7.08	0
IPI00791564.2	Enolase	0.2046	11	1	5	127	728100000				644600000				788500000				3	4	4	44	40	43	0.1407	0.1637	0.1816	77.11	85.21	73.91	236.23	391	42.7	5.12	0
IPI00794082.2	cDNA FLJ57650, highly similar to Bleomycin hydrolase	0.0788	2	1	3	3	12450000				13500000				0				1	2		1	2		0.038	0.0408		1.78	0		1.78	368	42.4	6.25	0
IPI00795046.1	Uncharacterized protein	0.3873	1	1	4	11	103600000				3958000000				0				3	2		5	6		0.2746	0.1972		0	0		0	142	16.2	11.63	0
IPI00795979.1	Uncharacterized protein	0.1925	2	1	7	7	220400000				81760000				17030000				3	2	2	3	2	2	0.0807	0.0538	0.0807	0	0	0	0	483	53.1	5.24	0
IPI00796528.4	cDNA FLJ34959 fis, clone NTONG2003454, highly similar to cGMP-dependent 3',5'-cyclic phosphodiesterase	0.0878	1	1	5	16	196900000				73300000				0				2	4		3	13		0.0293	0.0751		0	0		0	786	87.2	5.63	0
IPI00797574.3	Biorientation of chromosomes in cell division protein 1-like	0.1347	1	1	41	56	404000000				395700000				720100000				13	13	21	15	17	24	0.0492	0.0508	0.08	1.67	0	0	1.67	3051	330.3	5.08	0
IPI00827896.6	Isoform 3 of Microtubule-associated serine/threonine-protein kinase 4	0.1331	6	1	32	53	165800000				1788000000				132800000				16	15	11	19	19	15	0.0686	0.0645	0.0518	0	0	0	0	2434	265.2	8.73	0
IPI00829765.1	Zinc finger protein 440	0.2588	1	1	18	54	667800000				396100000				91690000				10	7	8	21	16	17	0.158	0.1462	0.1244	0	0	0	0	595	69.1	9.14	0
IPI00847415.1	Isoform 4 of Dual specificity protein kinase CLK3	0.1724	4	1	10	16	2232000000				101200000				1693000000				6	3	4	9	3	4	0.0987	0.0611	0.0658	0	2.75	2.95	5.7	638	73.5	9.92	0
IPI00852584.3	Isoform 1 of RNA-binding protein 33	0.0983	3	1	14	22	219700000				51860000				709400000				11	3	5	13	3	6	0.0812	0.0188	0.0573	2.28	0	0	2.28	1170	129.9	6.93	0
IPI00852637.2	cDNA FLJ60126, highly similar to Homo sapiens protein phosphatase 2A, regulatory subunit B', transcript variant 5, mRNA	0.2292	2	1	5	6	316300000				52540000				51000000				3	1	2	3	1	2	0.1385	0.0655	0.0907	0	0	3.81	3.81	397	43.9	7.65	0
IPI00853191.2	HCG1775942, isoform CRA_a	0.2673	3	1	22	32	3020000000				92870000				75920000				11	4	10	15	5	12	0.13	0.0582	0.1709	0	0	0	0	1100	127.8	8.78	0
IPI00854629.2	Isoform 5 of Obscurin	0.1061	5	2	68	93	2010000000				3310000000				2297000000				21	37	23	23	44	26	0.0409	0.052	0.0387	1.64	3.53	1.63	6.8	8483	924.4	5.97	0
IPI00855957.3	Isoform 2 of Far upstream element-binding protein 2	0.1282	5	1	9	12	233300000				1957000000				0				4	7		4	8		0.0648	0.0944		0	0		0	710	72.9	7.9	0
IPI00856012.1	Isoform 1 of Collagen alpha-6(VI) chain	0.0857	2	1	14	20	82290000				302000000				345600000				5	6	5	6	8	6	0.0437	0.0389	0.0314	0	0	0	0	2263	247	6.89	0
IPI00869068.1	Similar to Heterogeneous nuclear ribonucleoprotein A1 isoform a	0.1511	1	1	4	13	40380000				34920000				2028000000				3	2	3	3	5	5	0.1079	0.0935	0.1367	1.72	2.62	0	4.34	278	30.3	5.66	0
IPI00871660.1	Deleted in azoospermia-like	0.078	1	1	2	4	0				1015000000				0				1	2		1	3		0.0508	0.078		0	0		0	295	33.2	8.76	0
IPI00872161.1	Isoform 2 of Protein FAM98A	0.1506	3	1	5	12	383700000				15310000				16450000				2	2	4	4	4	4	0.0579	0.0579	0.1313	0	0	0	0	518	55.2	8.95	0
IPI00873010.1	Isoform 2 of Caytaxin	0.1347	6	1	4	6	1480000000				14360000				0				4	1		5	1		0.1347	0.0287		1.7	0		1.7	349	39.7	4.77	0
IPI00874238.3	Calpain-8	0.1038	1	1	4	5	71510000				459100000				0				3	2		3	2		0.0626	0.0612		0	0		0	703	79.1	5.22	0
IPI00878830.1	Uncharacterized protein	0.2893	1	1	1	3	0				3344000				0				1	1	1	1	1	1	0.2893	0.2893	0.2893	0	0	0	0	121	13.4	6.06	0
IPI00878912.1	Uncharacterized protein	0.1306	3	1	9	14	96090000				108600000				67870000				4	4	4	4	5	5	0.0747	0.0778	0.0607	1.97	0	1.94	3.91	643	70.8	8.05	0
IPI00879004.1	Isoform 4 of DNA topoisomerase 2-alpha	0.1563	5	1	24	42	239100000				2176000000				372200000				13	8	9	16	12	14	0.0912	0.0496	0.0639	0	0	0	0	1612	182.6	8.63	0
IPI00879999.1	Isoform 1 of ATP-dependent RNA helicase DDX54	0.0897	2	1	6	8	113700000				20000000				40710000				1	3	4	1	3	4	0.0114	0.0454	0.0681	0	2.15	2.63	4.78	881	98.5	10.02	0
IPI00884447.1	zinc finger protein 250 isoform b	0.2414	3	1	8	25	216400000				1826000000				261200000				4	2	4	12	3	10	0.0973	0.0685	0.1838	0	2.5	0	2.5	555	62.9	8.28	0
IPI00892850.2	Krueppel-like factor 11 isoform b	0.1495	2	1	5	70	118400000				1395000000				102500000				3	2	3	22	26	22	0.1273	0.0545	0.0768	0	0	0	0	495	53.3	8.32	0
IPI00893833.1	ATP-binding cassette sub-family B member 5 isoform 1	0.0939	2	1	10	14	407600000				229800000				1313000000				7	2	3	7	3	4	0.0668	0.0215	0.0342	0	0	0	0	1257	138.6	7.53	0
IPI00902654.2	cDNA FLJ54583, highly similar to Galectin-3-binding protein	0.1505	4	1	5	5	68940000				667000000				49410000				2	2	1	2	2	1	0.0866	0.0433	0.0206	0	0	0	0	485	54.6	5.49	0
IPI00902830.1	cDNA FLJ32673 fis, clone TESTI1000138, highly similar to Proprotein convertase subtilisin/kexin type 4	0.0899	1	1	3	20	778200				863900				60800000				2	2	3	5	3	12	0.0899	0.0899	0.0899	0	0	0	0	378	40.6	8.75	0
IPI00909083.1	eukaryotic peptide chain release factor GTP-binding subunit ERF3A isoform 2	0.0849	3	2	4	5	123700000				904800000				0				2	3		2	3		0.0535	0.0708		0	0		0	636	68.5	5.33	0
IPI00909355.1	cDNA FLJ59140	0.165	1	1	2	5	296800000				0				0				2		2	3		2	0.165		0.165	0		0	0	200	23.3	6.39	0
IPI00914953.1	G-rich sequence factor 1 isoform 2	0.1918	7	1	5	9	515700000				23470000				90200000				3	2	2	5	2	2	0.1226	0.0943	0.0692	2.4	2.97	1.69	7.06	318	36.6	5.69	0
IPI00916444.2	R27328_2	0.121	1	1	4	10	21740000				31060000				28410000				2	3	2	2	4	4	0.0815	0.121	0.079	0	0	0	0	405	46.4	7.03	0
IPI00917215.1	Uncharacterized protein	0.1349	2	1	14	25	63210000				149400000				435500000				4	8	6	6	9	10	0.0574	0.0961	0.0775	0	0	0	0	1394	155.6	8.57	0
IPI00917605.1	Uncharacterized protein	0.396	2	1	3	4	21270000				40010000				4778000000				1	1	2	1	1	2	0.1386	0.1386	0.2574	1.77	0	0	1.77	101	11.3	9.66	0
IPI00920945.1	Conserved hypothetical protein	0.1395	1	1	1	1	0				0				0				1			1			0.1395			0			0	86	9.7	10.21	0
IPI00921441.1	Similar to SLIT-ROBO Rho GTPase activating protein 2 isoform b	0.352	1	1	3	4	81110000				570500000				0				1	2	1	1	2	1	0.152	0.224	0.128	1.75	0	2.57	4.32	125	13.4	9.42	0
IPI00922219.1	cDNA FLJ52086	0.1525	1	1	9	13	92830000				199900000				12600000000				5	3	4	6	3	4	0.1151	0.0553	0.0553	0	0	0	0	669	74.6	8.88	0
IPI00925844.1	EGF-like-domain, multiple 10	0.0655	1	1	3	5	406700000				271700000				36780000				2	1	1	2	2	1	0.0403	0.0185	0.0252	0	0	0	0	595	66	4.88	0
IPI00926773.1	Protein	0.2388	1	1	2	5	1069000000				123900000				1519000000				1	2	1	2	2	1	0.1045	0.2388	0.1343	0	0	0	0	67	8.1	7.42	0
IPI00927049.1	Uncharacterized protein	0.1007	1	1	1	2	92880000				0				0				1			2			0.1007			0			0	149	16.4	8.51	0
IPI00927793.1	Uncharacterized protein	0.3523	1	1	2	20	121100000				7627000000				55030000				2	2	2	4	8	8	0.3523	0.3523	0.3523	0	0	0	0	88	9.9	4.78	0
IPI00927799.1	cDNA FLJ57878, highly similar to Beta-catenin	0.1344	2	1	7	10	14480000				19040000				287700000				2	3	5	2	3	5	0.053	0.0556	0.0917	0	0	0	0	774	84.7	5.92	0
IPI00939198.1	Isoform 2 of Receptor-interacting serine/threonine-protein kinase 1	0.2688	2	1	13	17	420700000				380600000				93840000				5	6	3	6	8	3	0.0912	0.1248	0.0912	0	0	0	0	625	70.7	6.19	0
IPI00939680.1	Uncharacterized protein	0.229	1	1	11	28	103600000				34240000000				310000000				7	5	5	9	9	10	0.1663	0.1155	0.1174	0	0	0	0	511	58.6	8.95	0
IPI00940615.1	Uncharacterized protein	0.1298	5	1	31	37	531500000				921000000				650000000				14	8	10	15	12	10	0.0583	0.032	0.0525	0	0	0	0	3121	343.5	6.39	0
IPI00941553.2	Isoform 4 of Splicing factor 1	0.1369	9	1	6	10	75070000				58910000				30460000				2	3	3	2	5	3	0.0675	0.0547	0.0547	2.22	0	0	2.22	548	59.7	9.5	0
IPI00941659.1	Isoform 1 of Zinc finger homeobox protein 4	0.0704	4	1	23	25	282000000				294800000				89580000				8	10	6	8	11	6	0.0227	0.035	0.0199	0	0	0	0	3567	393.5	6.37	0
IPI00942126.1	Uncharacterized protein	0.125	4	1	3	7	198300000				280800000				24660000				2	2	1	3	3	1	0.0743	0.1014	0.0507	4.05	3.87	1.99	9.91	296	33	6.87	0
IPI00942344.2	cDNA FLJ54106, moderately similar to Synaptic vesicle membrane protein VAT-1 homolog	0.1692	4	2	4	7	72440000				290100000				81080000				1	2	1	2	2	3	0.0431	0.1169	0.0523	0	0	0	0	325	34.9	5.78	0
IPI00942873.1	Uncharacterized protein	0.1711	3	1	19	81	1480000000				1546000000				664000000				13	9	8	26	30	25	0.1339	0.1045	0.1088	6.5	4.49	4.19	15.18	1397	151.7	9.16	0
IPI00946085.1	Protein	0.1155	1	1	18	23	31640000				189200000				306500000				5	9	5	7	10	6	0.0284	0.0614	0.0378	0	1.68	0	1.68	1481	169.1	7.68	0
IPI00946848.1	Uncharacterized protein	0.1013	1	1	1	4	1044000000				961700000				887300000				1	1	1	1	1	2	0.1013	0.1013	0.1013	0	0	0	0	79	9	9.57	0
IPI00953925.1	Aryl hydrocarbon receptor interacting protein	0.3205	4	1	8	11	3601000				2218000000				3272000000				2	5	3	2	5	4	0.0682	0.2285	0.1543	0	0	0	0	337	38.5	6.84	0
IPI00955882.1	Zinc finger BED domain-containing protein 6	0.1001	1	1	11	17	4212000				2137000000				66170000				1	8	4	1	12	4	0.0123	0.0705	0.046	0	0	0	0	979	109.9	6.55	0
IPI00964399.1	Uncharacterized protein	0.1777	6	1	2	3	31920000				26150000				0				2	1		2	1		0.1777	0.0702		0	0		0	242	25.5	8.92	0
IPI00965904.1	Uncharacterized protein	0.0404	1	1	1	62	16850000000				60700000				16550000000				1	1	1	16	20	26	0.0404	0.0404	0.0404	0	0	0	0	223	25.3	4.86	0
IPI00966829.1	69 kDa protein	0.1705	11	4	12	23	2669000000				712600000				829500000				9	3	3	17	3	3	0.1242	0.0546	0.0679	3.68	0	0	3.68	604	69.2	6.37	0
IPI00966895.1	Ubiquitin carboxyl-terminal hydrolase	0.0339	3	1	4	13	1127000000				202700000				213700000				3	3	2	4	6	3	0.0319	0.0339	0.0209	0	0	0	0	1004	113.1	6.43	0
IPI00966995.1	Protein	0.3559	2	1	1	2	150700000				141100000				0				1	1		1	1		0.3559	0.3559		1.67	1.89		3.56	59	6.2	9.99	0
IPI00967421.1	cDNA FLJ61614, highly similar to TBC1 domain family member 1	0.1044	3	1	9	12	268000000				54020000				320100000				5	2	3	6	3	3	0.044	0.0198	0.0518	0	0	0	0	1159	131.3	7.58	0
IPI00967572.2	toll-like receptor 10 isoform b	0.1104	2	1	9	10	170700000				386600000				214400000				6	2	2	6	2	2	0.0866	0.0238	0.0238	0	0	0	0	797	92.8	6.68	0
IPI00968057.1	Uncharacterized protein	0.1209	4	1	13	51	20640000000				11270000000				11300000000				3	7	7	16	16	19	0.0194	0.0575	0.0731	0	0	0	0	1340	150.8	8.22	0
IPI00968165.1	Uncharacterized protein	0.1112	2	1	10	22	33630000				199800000				65270000				4	5	6	8	7	7	0.0365	0.0626	0.0747	0	0	0	0	1151	130.6	7.97	0
IPI00973763.1	Uncharacterized protein	0.1693	1	1	3	3	7894000				0				38740000				1		2	1		2	0.0767		0.0927	0		0	0	313	35.2	6.21	0
IPI00978965.1	Protein	0.0619	1	1	1	3	11770000				0				16620000				1		1	1		2	0.0619		0.0619	0		0	0	194	21	6.51	0
IPI00979371.2	DNA-directed RNA polymerase	0.0884	3	1	18	47	1752000000				2383000000				959200000				9	9	4	20	22	5	0.0512	0.0413	0.0238	0	0	0	0	1935	213.1	7.28	0
IPI00980134.1	Conserved hypothetical protein	0.3197	1	1	3	3	311800000				14510000				0				1	2		1	2		0.1557	0.1639		0	0		0	122	14.2	9.47	0
IPI00981773.1	cDNA FLJ53377, highly similar to Procollagen-lysine, 2-oxoglutarate 5-dioxygenase 1	0.1319	3	1	7	9	1188000000				442000000				260000				6	1	1	6	2	1	0.1116	0.0145	0.0203	1.94	0	0	1.94	690	79.3	7.02	0
IPI00981993.1	Uncharacterized protein	0.2182	1	1	2	3	264100000				1236000000				0				1	1		1	2		0.1152	0.103		0	0		0	165	18.1	4.7	0
IPI00983445.1	cDNA, FLJ79081, highly similar to Squalene synthetase	0.2363	8	1	7	10	51460000				171600000				919100				3	4	1	4	5	1	0.0928	0.1561	0.0232	0	1.6	0	1.6	474	53.4	7.27	0
IPI00983542.1	Ataxin 3 variant e	0.2716	1	1	1	8	3357000				872100				4564000				1	1	1	2	2	4	0.2716	0.2716	0.2716	0	0	0	0	81	9.2	4.55	0
IPI00983777.1	protein FAM27E2-like	0.1846	1	1	6	12	180500000				33730000				1220000000				3	4	2	5	4	3	0.1282	0.1744	0.1128	0	0	0	0	195	22.4	11.87	0
IPI00984437.1	Uncharacterized protein	0.3933	1	1	4	10	2649000000				67620000				0				3	3	1	5	4	1	0.34	0.2667	0.1333	0	0	0	0	150	15.8	9.94	0
IPI00985458.1	Uncharacterized protein	0.1204	3	1	42	85	304400000				2157000000				685800000				20	19	17	34	25	26	0.0626	0.0592	0.0535	0	3.64	1.78	5.42	4410	503	5.9	0
IPI01009440.1	cDNA FLJ61314, highly similar to Receptor-type tyrosine-protein phosphatase alpha	0.1109	7	1	7	24	79270000				109600000				40250000				6	3	2	11	7	6	0.1094	0.0562	0.0517	1.65	0	1.74	3.39	658	75.8	7.72	0
IPI01010498.1	secernin-1 isoform c	0.1098	7	1	3	4	22370000				26160000				0				2	1		3	1		0.078	0.0318		2.73	0		2.73	346	38.8	4.7	0
IPI01011513.1	208 kDa protein	0.1078	6	1	22	31	769400000				202300000				117600000				9	8	9	12	9	10	0.0598	0.0497	0.0491	0	0	0	0	1873	207.7	6.67	0
IPI01012519.1	Uncharacterized protein	0.1684	1	1	2	4	143800000				1700000				0				2	1		3	1		0.1684	0.0714		0	0		0	196	21.6	7.31	0
IPI01013717.1	Uncharacterized protein	0.0734	3	1	3	9	6596000				179000000				0				1	3	1	3	5	1	0.0253	0.0734	0.0253	0	0	0	0	395	44.6	8.6	0
IPI01015673.1	Uncharacterized protein	0.0961	6	1	8	57	181600000				86460000				1406000000				5	4	5	22	13	22	0.0535	0.0605	0.0674	0	0	0	0	1009	115.5	7.55	0
IPI01016054.1	Putative uncharacterized protein DKFZp686P12272	0.192	2	1	5	12	71240000				47920000				0				3	4		5	7		0.096	0.1627		0	2.28		2.28	375	41.6	8.27	0
IPI01020792.1	20 kDa protein	0.1818	2	1	2	5	0				30640000				0				1	1	1	2	1	2	0.0852	0.0966	0.0852	0	0	0	0	176	20.1	7.08	0
IPI01022464.1	14 kDa protein	0.2344	2	1	4	4	9377000				1223000000				32990000				2	1	1	2	1	1	0.1328	0.0469	0.0781	0	0	0	0	128	14.3	9.92	0
IPI01025806.1	signal transducer and activator of transcription 2 isoform 2	0.1169	4	1	8	9	496400000				118100000				75210000				3	4	2	3	4	2	0.0519	0.0531	0.026	0	0	0	0	847	97.4	5.49	0
IPI01025809.1	23 kDa protein	0.1787	7	1	3	6	81240000				40340000				0				3	1		5	1		0.1787	0.0628		0	0		0	207	22.8	10.2	0
IPI00001539.8	3-ketoacyl-CoA thiolase, mitochondrial	0.0504	1	1	1	2	0				13190000				36940000					1	1		1	1		0.0504	0.0504		0	0	0	397	41.9	8.09	0
IPI00014230.1	Complement component 1 Q subcomponent-binding protein, mitochondrial	0.1064	1	1	3	3	0				19800000				15330000					2	1		2	1		0.0851	0.0213		3.5	0	3.5	282	31.3	4.84	0
IPI00019771.1	Fractalkine	0.1662	1	1	6	9	0				1322000000				111700000					3	3		4	5		0.1008	0.0655		0	0	0	397	42.2	6.52	0
IPI00029263.2	Isoform 1 of Tyrosine-protein kinase Fer	0.1533	2	1	9	9	0				32810000				244300000					5	4		5	4		0.0852	0.0681		0	0	0	822	94.6	7.14	0
IPI00032561.1	Calcium-binding protein 39	0.132	1	1	4	4	0				37310000				31600000					3	1		3	1		0.0938	0.0381		0	0	0	341	39.8	6.89	0
IPI00168691.8	SHC SH2 domain-binding protein 1	0.0521	1	1	3	3	0				569000				190700000					1	2		1	2		0.0283	0.0432		0	0	0	672	75.6	4.75	0
IPI00171291.1	F-box only protein 6	0.1638	1	1	3	4	0				41580000				0					3			4			0.1638			3.38		3.38	293	33.9	6.09	0
IPI00178273.6	Uncharacterized protein	0.051	1	1	2	8	0				96830000				88200000					1	2		3	5		0.017	0.051		0	0	0	529	57.9	7.06	0
IPI00219678.3	Eukaryotic translation initiation factor 2 subunit 1	0.1746	3	1	4	6	0				35690000				35330000					1	3		1	5		0.0476	0.127		2.27	0	2.27	315	36.1	5.08	0
IPI00291704.2	Histone deacetylase complex subunit SAP25	0.1859	1	1	2	4	0				8043000				2516000					2	1		3	1		0.1859	0.0854		0	0	0	199	20.9	7.72	0
IPI00448880.2	cDNA FLJ52338, highly similar to Calpain-9	0.0766	3	1	3	3	0				18800000				34940000					1	2		1	2		0.0335	0.0431		0	0	0	627	72.3	5.54	0
IPI00640483.1	Uncharacterized protein	0.0917	1	1	1	2	0				13490000				53060000					1	1		1	1		0.0917	0.0917		0	0	0	229	25.7	6.74	0
IPI00815665.12	Trypsin-2	0.1498	6	1	3	3	0				1013000000				84000000					2	1		2	1		0.1093	0.0688		0	0	0	247	26.5	4.92	0
IPI00924836.1	25 kDa protein	0.0568	1	1	1	1	0				74580000				0					1			1			0.0568			0		0	229	24.7	5.8	0
IPI00967302.1	Isoform 2 of Zinc finger and SCAN domain-containing protein 10	0.0959	2	1	4	6	0				80960000				197900000					2	3		2	4		0.0233	0.0959		0	0	0	386	43.9	10.11	0
IPI00967724.1	16 kDa protein	0.1293	1	1	1	1	0				58080000				0					1			1			0.1293			0		0	147	16.2	8.81	0
IPI00007618.1	Gap junction delta-2 protein	0.0872	1	1	1	1	0				0				37720000						1			1			0.0872			0	0	321	36.1	8.68	0
IPI00449036.1	Isoform 3 of Homeobox protein DLX-4	0.1667	2	1	1	1	0				0				513700						1			1			0.1667			0	0	114	12.7	9.8	0
IPI00843804.1	Cyclin D3 variant (Fragment)	0.0451	1	1	1	1	0				0				271600000						1			1			0.0451			0	0	288	31.5	7.8	0
